# Supplementary material for: Enantiodivergent reduction of α-keto amides catalyzed by high valent, chiral oxido-vanadium(v) complexes
Source: Royal Society of Chemistry journal article supplement (doi:10.1039/c9qo01304k), 2020-01-01
Supplement: c9qo01304k1.pdf [file c9qo01304k1.pdf]

## Enantiodivergent Reduction of $\alpha$ -Keto Amides Catalyzed by High Valent, Chiral Oxido-Vanadium (V) Complexes

Rachit Agarwal, Yiya Liao, Dai-Jen Lin, Zhen-Xing Yang, Chien-Fu Lai and Chien-Tien Chen\*  
Department of chemistry, National Tsing Hua University, No. 101, Section 2, Kuang-Fu Road,  
Hsinchu 30013, Taiwan, E-mail: [ctchen@mx.nthu.edu.tw](mailto:ctchen@mx.nthu.edu.tw)

### Table of contents

|                                                                                                           |          |
|-----------------------------------------------------------------------------------------------------------|----------|
| 1. General materials and methods.....                                                                     | S2       |
| 2. General Synthetic procedure and characterization data for oxo-vanadium(V) complexes <b>1a-1e</b> ..... | S3-S5    |
| 3. Synthetic procedure and characterization data of oxo-vanadium(V) complex <b>1f</b> .....               | S6       |
| 4. General reaction procedure for the asymmetric reduction of $\alpha$ -keto-amides.....                  | S7       |
| 5. General synthetic procedure of starting materials.....                                                 | S7-S19   |
| 6. Table S1-S4: Effect of additives on the asymmetric reduction.....                                      | S21-S22  |
| 7. X-ray data.....                                                                                        | S23      |
| 8. References.....                                                                                        | S26      |
| 9. HPLC spectra .....                                                                                     | S28-S55  |
| 10. $^1\text{H}$ and $^{13}\text{C}$ NMR spectra .....                                                    | S56-S149 |

## 1. General materials and methods:

$^1\text{H}$  NMR and  $^{13}\text{C}$  NMR spectra were recorded on 400 MHz  $^1\text{H}$  (100 MHz  $^{13}\text{C}$ ) spectrometers in deuterio chloroform with chloroform or deuterio methanol with methanol as an internal reference unless otherwise stated. Chemical shifts are reported in ppm ( $\delta$ ). Coupling constants,  $J$ , are reported in Hz. The abbreviations s, d, t, pent, quint, sext, dd, ddd, dt, and m stand for the resonance multiplicities singlet, doublet, triplet, pentet, quintet, sextet, doublet of doublets, doublet of doublet of doublets, doublet of triplets, and multiplet, respectively. Mass spectra were recorded with an ionization voltage of 70 or 20 eV unless otherwise stated. Elemental analyses were obtained by the Department of Chemistry, National Tsing Hua University, Taiwan or Department of Photonics, National Chiao Tung University, Taiwan. Fast atom bombardment (FAB) and electrospray ionization (ESI) mass spectra were recorded with data reported in the form  $m/e$  (intensity relative to base peak). Analytical TLC was performed on silica gel plates. Visualization was accomplished with UV light (254 nm) or with  $\text{KMnO}_4$  staining agents. Column (flash) chromatography was performed using 40-60  $\mu\text{m}$  silica gel. Analytical high pressure liquid chromatography (HPLC) was performed with a built-in photometric detector ( $\lambda = 220 \text{ nm}$  or  $254 \text{ nm}$ ) using a Diacel AS-H, AD-H (0.46 cm  $\times$  25cm). Solvents for HPLC analyses were of spectroscopic grade and filtered before use. All enantiomeric excess determinations for optically enriched products were correlated with the corresponding racemic samples by HPLC analyses on chiral columns. Solvents for extraction and chromatography were reagent grade. Optical rotations are reported as follows:  $[\alpha]_D^{25}$  ( $c = \text{g}/100\text{mL}$ , solvent). Toluene, Tetrahydrofuran (THF) and 1,2-Dimethoxyethane (DME) were dried over sodium benzophenone-ketyl intermediate under  $\text{N}_2$  atmosphere and distilled before use. Dichloromethane (DCM) were dried over  $\text{CaH}_2$ . Chlorobenzene was distilled from anhydrous  $\text{K}_2\text{CO}_3$ . 4,4,5,5-Tetramethyl-1,3,2-dioxaborolane (Pinacolborane) and Catecholborane are brought from Acros Organics and are used as such without any further purification. Benzyl isocyanide was purchased from ACROS and used as received.  $\text{SiCl}_4$  was purchased from Sigma Aldrich and used as received. All reaction products were isolated as chromatographically pure materials. All the other chemicals are bought from Sigma Aldrich or Acros Organics and are used as such without any purification. Catalysts were synthesized according our previously reported procedure.<sup>1</sup> Compound **3h-j**, **3n** are new compounds which were prepared according to method-b.<sup>3</sup>

### List of Abbreviations:

HPLC - high performance liquid chromatography, FT-IR – Fourier transform infrared, HRMS (ESI<sup>+</sup>) – High resolution mass spectra (electrospray ionization), ee - enantiomeric excess, THF- Tetrahydrofuran, TLC - Thin layer chromatography, DME - 1,2 Dimethoxyethane, DCM- Dichloromethane, TBME - *tert*-Butyl methyl ether, HB(pin) - Pinacolborane, HB(Cat) - Catecholborane, Ar – Argon,

## 2. General Synthetic procedure and characterization data of oxo-vanadium(V) complexes 1a-1e.<sup>1</sup>

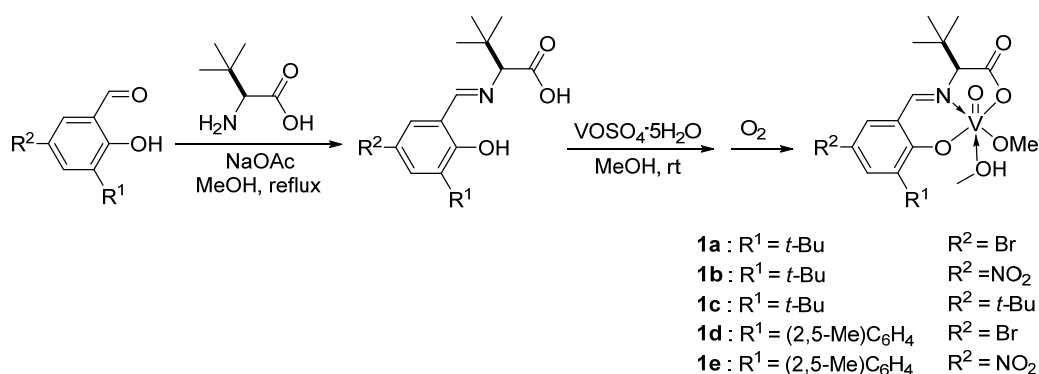

In a 50-mL, two-necked, round-bottomed flask was placed L-*tert*-leucine (5 mmol) and NaOAc·5·H<sub>2</sub>O (1.17 g, 10 mmol) in degassed methanol (10 mL). After having been stirred at 60 °C for 10 min to affect their complete dissolution, the reaction mixture was treated dropwise with a solution of respective 2-hydroxy-benzaldehyde derivatives (5 mmol) in degassed methanol (12.5 mL). The reaction mixture became homogeneous by heating at 80 °C for 15 min and then gradually cooled to ambient temperature for 2 h. To the resultant Schiff base was added a solution of vanadyl (IV) sulfate trihydrate (1.08 g, 5 mmol) in degassed methanol (20 mL). Dark green complex started crashing out in 15 min. The reaction mixture was stirred for 2h and then concentrated to half of the original solvent volume. The crude vanadyl(IV) complex collected by filtration was washed sequentially with water (5 × 25 mL) and cold ether (5 × 25 mL) and then dried *in vacuo* to furnish pure vanadyl(IV) catalyst. The corresponding analytically pure oxo-vanadium (V) complexes were obtained by re-crystallization from oxygen-saturated MeOH and were used for asymmetric

reduction experiments.

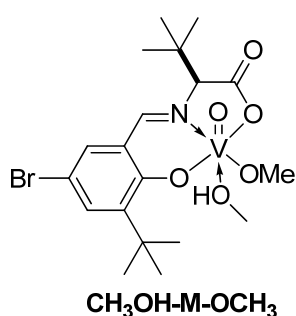

**Data for complex 1a:**  $^1\text{H NMR}$  ( $\text{CD}_3\text{OD}$ , 400 MHz)  $\delta$  8.54 (bs, 1H), 7.66 (d,  $J = 2.5$  Hz, 1H), 7.63 (d,  $J = 2.5$  Hz, 1H), 4.15 (s, 1H), 3.35 (s, OCH<sub>3</sub>), 1.45 (s, 9H), 1.20 (s, 9H);  $^{51}\text{V NMR}$  ( $\text{CD}_3\text{OD}$ , 105 MHz)  $\delta$  -567.3;  $^{13}\text{C NMR}$  ( $\text{CD}_3\text{OD}$ , 100 MHz)  $\delta$  167.7, 142.3, 137.0, 136.3, 135.1, 134.7, 123.8, 111.9, 84.7, 49.8, 38.3, 36.3, 29.9, 28.0; **IR (KBr)** 2965 (s), 2913 (m), 2869 (m), 1663 (s), 1615 (s, C=N), 1578 (m), 1548 (m, COO), 1480 (w), 1429 (m), 1368 (m), 1320 (m), 1297 (s), 1181 (m), 1055 (w), 1031 (w), 993 (m, V=O); M.W. (**M**:  $\text{C}_{17}\text{H}_{22}\text{BrNO}_4\text{V}$ ) 434; **MS (ESI)** 450 ( $\text{MOH-1}^+$ , 100);  $[\alpha]_{\text{D}}^{34}$  306.53 ( $c$  0.1,  $\text{CH}_3\text{OH}$ ); **TLC**  $R_f$  0.20 ( $\text{MeOH}/\text{CH}_2\text{Cl}_2$ , 1/9); Anal. Calcd. For  $[(\text{H}_2\text{O})\text{MOH}]$ : C, 43.42; H, 5.36; N, 2.98. Found: C, 43.54; H, 5.13; N, 3.41.

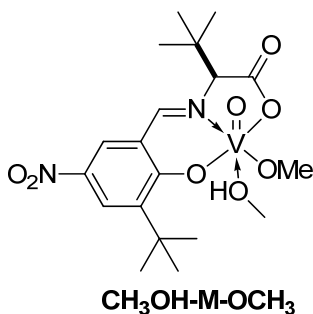

**Data for complex 1b:**  $^1\text{H NMR}$  ( $\text{CD}_3\text{OD}$ , 400 MHz)  $\delta$  8.71 (bs, 1H), 8.54 (d,  $J = 2.6$  Hz, 1H), 8.39 (d,  $J = 2.5$  Hz, 1H), 4.24 (s, 1H), 3.31 (s, OCH<sub>3</sub>), 1.49 (s, 9H), 1.22 (s, 9H);  $^{51}\text{V NMR}$  ( $\text{CD}_3\text{OD}$ , 105 MHz)  $\delta$  -549.8, -568.8;  $^{13}\text{C NMR}$  ( $\text{CD}_3\text{OD}$ , 100 MHz)  $\delta$  168.0, 140.5, 139.1, 130.1, 130.0, 128.4, 127.6, 121.5, 84.9, 38.3, 36.5, 29.7, 28.0; **IR (KBr)** 2965 (w), 2916 (w), 2879 (w), 1627 (m, C=N), 1598 (m, COO), 1509 (w), 1326 (m), 1326 (w), 1225 (w), 1187 (w), 1113 (w), 1034 (w), 990 (w), 927 (w, V=O); M.W. (**M**:  $\text{C}_{17}\text{H}_{22}\text{N}_2\text{O}_6\text{V}$ ) 401.3; **MS (ESI)** 850 ( $\text{M}_2\text{O}+\text{H}_2\text{O}^+$ , 90), 419 ( $\text{MOH}+\text{H}^+$ , 9), 417 ( $\text{MOH-1}^+$ , 100);  $[\alpha]_{\text{D}}^{34}$  83.93 ( $c$  0.1,  $\text{CH}_3\text{OH}$ ); **TLC**  $R_f$  0.30 ( $\text{MeOH}/\text{CH}_2\text{Cl}_2$ , 1/4); Anal. Calcd. For  $[(\text{H}_2\text{O})\text{MOH}]$ : C, 46.80; H, 5.78; N, 6.42. Found: C, 45.57; H, 5.83; N, 6.15.

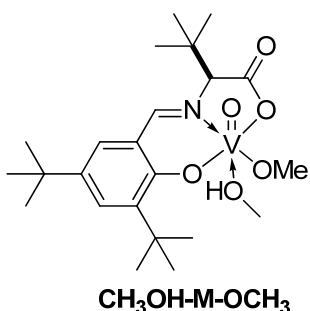

**Data for 1c :**  $^1\text{H NMR}$  ( $\text{CD}_3\text{OD}$ , 400 MHz)  $\delta$  8.60 (bs, 1H), 7.68 (d,  $J = 2.3$  Hz, 1H), 7.48 (d,  $J = 2.3$  Hz, 1H), 4.14 (s, 1H), 3.35 (s, OCH<sub>3</sub>), 1.47 (s, 9H), 1.35 (s, 9H), 1.20 (s, 9H);  $^{51}\text{V NMR}$  ( $\text{CD}_3\text{OD}$ , 105 MHz)  $\delta$  -563.2;  $^{13}\text{C NMR}$  ( $\text{CD}_3\text{OD}$ , 100 MHz)  $\delta$  180.1, 168.9, 161.7, 143.5, 138.6, 132.4, 129.4, 121.9, 84.7, 38.3, 36.3, 35.3, 31.8, 30.3, 28.1; **IR (KBr)** 2958 (m), 2913 (w), 2868 (w), 1699 (m), 1612 (s, C=N), 1559

(w, COO), 1474 (w), 1459 (m), 1436 (w), 1418 (w), 1395 (w), 1363 (w), 1275 (w), 1260 (w), 1210 (w), 1183 (w), 1000 (w, V=O); M.W. (**M**: C<sub>21</sub>H<sub>31</sub>NO<sub>4</sub>V) 412.4; MS (ESI) 881 (**M**<sub>2</sub>O+H<sub>2</sub>O+Na<sup>+</sup>, 6), 460 ([H<sub>2</sub>OMOCH<sub>3</sub>]<sup>+</sup>, 77), 444 ([MOCH<sub>3</sub>+H]<sup>+</sup>, 13), 413 (**M**+H<sup>+</sup>, 100); [ $\alpha$ ]<sub>D</sub><sup>34</sup> 262.87 (*c* 0.1, CH<sub>3</sub>OH); TLC R<sub>f</sub> 0.37 (MeOH/CH<sub>2</sub>Cl<sub>2</sub>, 1/8); Anal. Calcd. For [(H<sub>2</sub>O)MOH]: C, 56.37; H, 7.66; N, 3.13. Found: C, 55.72; H, 7.32; N, 2.71.

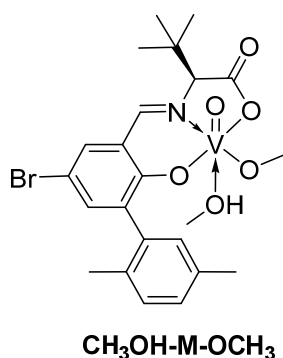

**Data for 1d:** <sup>1</sup>H NMR (CD<sub>3</sub>OD, 400 MHz).  $\delta$  8.61 (s, 1H), 7.79 (s, 1H), 7.52 (s, 1H), 7.14 (d, *J* = 7.6 Hz, 1H), 7.07 (d, *J* = 7.6 Hz, 1H), 6.97 (s, 1H), 4.17 (s, 1H), 3.33 (s, OCH<sub>3</sub>), 2.30 (s, 3H), 2.22 (s, 3H), 1.19 (s, 9H); <sup>51</sup>V NMR (CD<sub>3</sub>OD, 105 MHz)  $\delta$  -559.3; <sup>13</sup>C NMR (CD<sub>3</sub>OD, 100 MHz)  $\delta$  167.3, 140.4, 137.6, 136.1, 135.9, 135.0, 131.8, 130.7, 129.6, 123.4, 111.4, 84.6, 38.3, 28.0, 21.0, 19.8; IR (KBr) 3446 (br, w, NH), 2961 (m), 1687 (m), 1616 (s), 1553 (s), 1432 (s), 1314 (s), 1002 (m, V=O); [ $\alpha$ ]<sub>D</sub><sup>25</sup> 236.43 (*c* 0.1, CH<sub>3</sub>OH); TLC R<sub>f</sub> 0.28 (*i*PrOH/Hexanes, 1/5); HRMS (ESI) [M+H]<sup>+</sup> Calcd for C<sub>22</sub>H<sub>26</sub>BrNO<sub>5</sub>V: 514.0434, found: 514.0434.

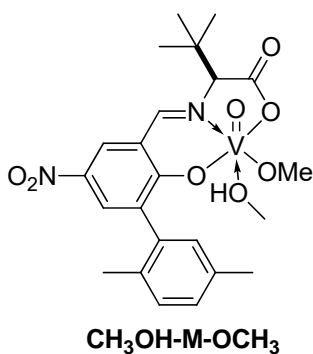

**Data for 1e:** <sup>1</sup>H NMR (CD<sub>3</sub>OD, 400 MHz)  $\delta$  8.79 (bs, 1H), 8.67 (d, *J* = 2.9 Hz, 1H), 8.28 (d, *J* = 2.8 Hz, 1H), 7.21 (d, *J* = 7.8 Hz, 1H), 7.15 (dd, *J* = 1.3, 7.8 Hz, 1H), 7.05 (s, 1H), 3.35 (s, OCH<sub>3</sub>), 4.25 (s, 1H), 3.35 (s, OCH<sub>3</sub>), 2.36 (s, 3H, CH<sub>3</sub>), 2.25 (s, 3H, CH<sub>3</sub>), 1.23 (s, 9H); <sup>51</sup>V NMR (105 MHz, CD<sub>3</sub>OD)  $\delta$  -559.6; <sup>13</sup>C NMR (100 MHz, CD<sub>3</sub>OD)  $\delta$  178.8, 167.8, 166.2, 140.6, 137.2, 136.3, 135.1, 134.3, 132.1, 131.8, 130.8, 130.1, 121.2, 85.0, 38.4, 28.1, 21.0, 19.8; IR (KBr) 3005(w), 2975 (w), 1628 (m, C=N), 1599 (m), 1509 (m), 1456 (w), 1434 (w), 1326 (s), 1276 (s), 1260 (m), 1100 (m), 999 (w, V=O); [ $\alpha$ ]<sub>D</sub><sup>34</sup> 150.73 (*c* 0.1, CH<sub>3</sub>OH); TLC R<sub>f</sub> 0.25 (MeOH/CH<sub>2</sub>Cl<sub>2</sub>, 1/9). M.W. (**M**: C<sub>21</sub>H<sub>22</sub>N<sub>2</sub>O<sub>6</sub>V, 449.4); MS (ESI) calcd. For C<sub>22</sub>H<sub>25</sub>N<sub>2</sub>O<sub>7</sub>V+1: 481.1101(**M**+OCH<sub>3</sub>+1); found.481.1173 (**M**+OCH<sub>3</sub>+1, 100);

### 3. Synthetic procedure and characterization data of oxo-vanadium(V) complex **1f**.

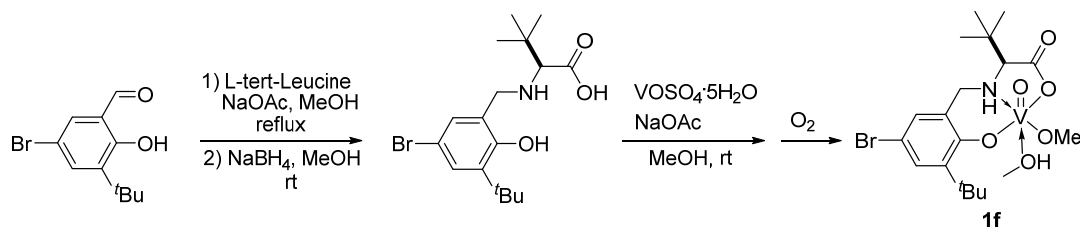

In a 50-mL, two-necked, round-bottomed flask was placed L-tert-leucine (5 mmol) and NaOAc·5·H<sub>2</sub>O (643.5 mg, 5.5 mmol) in degassed methanol (10 mL). After having been stirred at 60 °C for 10 min to affect their complete dissolution, the reaction mixture was treated dropwise with a solution of 5-bromo-3-(tert-butyl)-2-hydroxybenzaldehyde (5 mmol) in degassed MeOH (12.5 mL). The reaction mixture refluxed at 80 °C for 20 hours and then gradually cooled to ambient temperature. To this mixture sodiumborohydride (5 mmol) was added. After 10 mins, under ice bath 1 N aqueous solution of HCl was added to make the pH = 2, white solid was precipitated, washed with distilled water and dried to give compound **5**. A solution of vanadyl (IV) sulfate trihydrate (1.08 g, 5 mmol) and NaOAc·5·H<sub>2</sub>O (643.5 mg, 5.5 mmol) in degassed methanol (5 mL) was added to compound **5**. The reaction mixture was stirred for 4h and then concentrated to half of the original solvent volume. The crude vanadyl(IV) complex collected by filtration was washed sequentially with water (5 × 25 mL) and cold ether (5 × 25 mL) and then dried *in vacuo* to furnish pure vanadyl(IV) catalyst. The corresponding analytically pure oxo-vanadium (V) complexes were obtained by re-crystallization from oxygen-saturated MeOH to obtain dark brown crystals of **1f** in 47% yield.

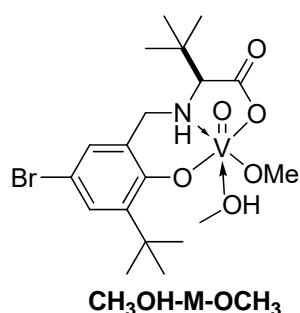

Data for complex **1f**: <sup>1</sup>H NMR (400 MHz, CD<sub>3</sub>OD) δ 7.40 (d, *J* = 2.2 Hz, 1H), 7.26 (d, *J* = 2.2 Hz, 1H), 4.57 (bs, 1H), 3.95 (d, *J* = 11.8 Hz, 1H); 3.73 (d, *J* = 11.9 Hz, 1H), 3.35 (s, OCH<sub>3</sub>), 3.28 (s, 1H), 1.48 (s, 9H), 1.21 (s, 9H); <sup>13</sup>C NMR (100 MHz, CD<sub>3</sub>OD) δ 164.8, 140.4, 130.9, 130.4, 128.4, 126.5, 113.3, 76.0, 53.6, 49.8, 37.2, 36.2, 30.6, 27.2; <sup>51</sup>V NMR (105 MHz, CD<sub>3</sub>OD) δ -512.0, -525.1; IR 3449(br, w, NH), 2958 (m), 2872 (m), 1654(s), 1463 (m), 1434 (s), 1409 (m), 1340 (m), 1267(s), 1247(s), 1053(s), 970(m, V=O); [α]<sub>D</sub><sup>25</sup> 562.00 (*c* 0.1, CH<sub>3</sub>OH); TLC R<sub>f</sub> 0.1 (MeOH/CH<sub>2</sub>Cl<sub>2</sub>, 1/10).

## 4. General reaction procedure for the asymmetric reduction of

### *N*-benzyl- $\alpha$ -keto-amides.

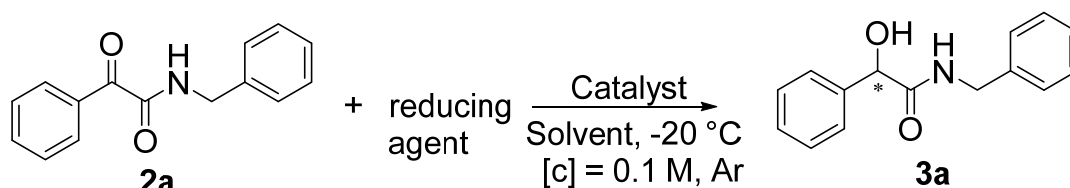

In a dried Schlenk tube was placed *N*-benzyl  $\alpha$ -keto-amide (47.9 mg, 0.2 mmol) and vanadyl catalyst (9.4 mg, 0.02 mmol, 10 mol%) in anhydrous toluene (1.75 mL) under argon atmosphere. After having been stirred at ambient temperature for 30 min, the Schlenk tube was cooled to -20 °C for 30 min. A solution of HBpin or HBCat (64  $\mu$ L, 0.6 mmol, 3 equiv) in anhydrous toluene (186  $\mu$ L) was cooled to -20 °C and then added to the reaction mixture thru a gas-tight microsyringe. After having been complete as checked by TLC, the reaction was quenched by deionized water (2.5 mL) at -20 °C (10 min) and then gradually warmed to ambient temperature for 30 min. The reaction mixture was extracted with EtOAc (10 mL  $\times$  3). The combined organic extracts were dried (MgSO<sub>4</sub>, 1-1.2 g), filtered, and evaporated. The crude residue was purified by column chromatography (eluent: ethyl acetate in hexane) on silica gel to provide *N*-benzyl  $\alpha$ -hydroxy-amide (46.9 mg, 98% yield).

## 5. General synthetic procedure for starting materials:

### 5.1 Method (a)<sup>2</sup>

#### *N*-Benzyl-2-oxo-2-phenylacetamide (**2a**)<sup>1</sup>

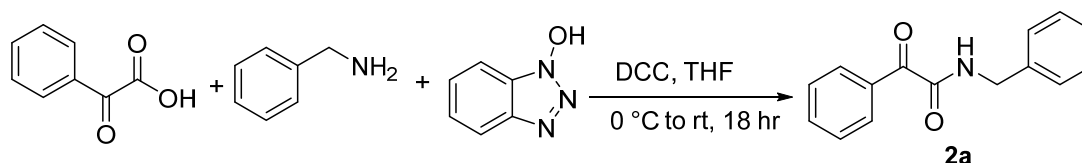

In a 250 mL, two-necked, round bottomed flask was placed phenylglyoxylic (1.5 g, 10.0 mmol, 1.0 equiv), benzylamine (1.1 mL, 10.0 mmol, 1.0 equiv) and *N,N*-dicyclohexylcarbodiimide (DCC, 2.1 g, 10.0 mmol, 1.0 equiv) in 100 mL anhydrous THF. To this reaction mixture was added hydroxybenzotriazole (HOBt, 1.4 g, 10.0 mmol, 1.0 equiv) and stirred at room temperature for 18 hours. The resulting DCU was filtered off with suction filter and the organic filtrate was dried over anhydrous MgSO<sub>4</sub> (3.0 g), and then evaporated to dryness. The crude product was recrystallized from hot diethyl ether to give **2a** (1.93 g, 80% yield).

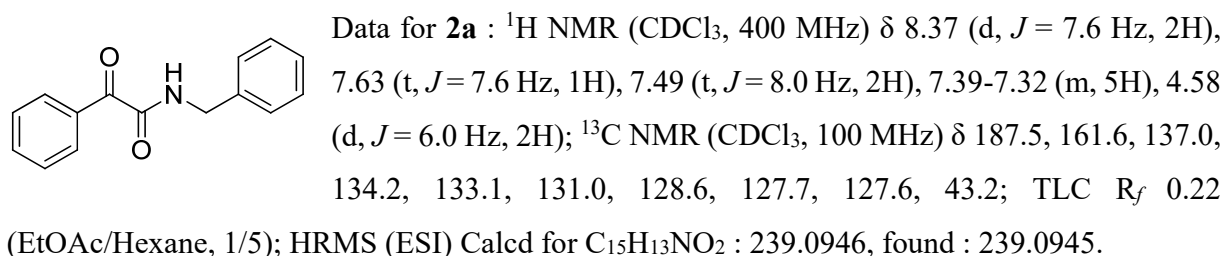

#### *N*-Benzyl-2-hydroxy-2-phenylacetamide (**3a**)<sup>1</sup>

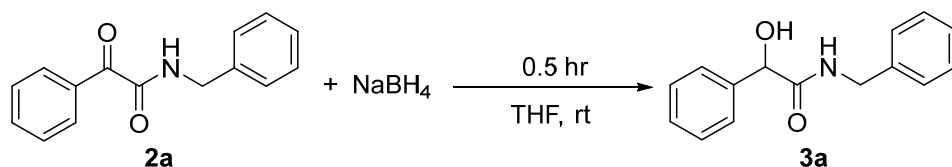

In a 25 mL, two-necked, round bottomed flask was placed compound **2a** (224 mg, 0.94 mmol, 1.0 eq.) in anhydrous THF (9.0 mL). Sodium borohydride (36 mg, 0.94 mmol) was then added and the reaction mixture was stirred at ambient temperature for 30 minutes. The reaction mixture was quenched with deionized water (8 mL) and then extracted with ethyl acetate (8 mL × 3). The



combined extracts were dried over anhydrous MgSO<sub>4</sub>, filtered, evaporated. The crude product was purified by column chromatography (ethyl acetate/hexane) on silica gel.

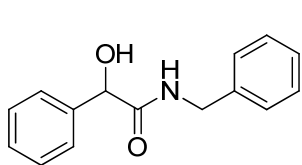

**Data for 3a** : <sup>1</sup>H NMR (CDCl<sub>3</sub>, 400 MHz) δ 7.39-7.27 (m, 8H), 7.18-7.16 (m, 2H), 6.50 (bs, 1H, NH), 5.05 (d, *J* = 3.2 Hz, 1H), 4.48-4.37 (m, 2H), 3.64 (d, *J* = 3.2 Hz, 1H, OH); <sup>13</sup>C NMR (CDCl<sub>3</sub>, 100 MHz) δ 172.3, 139.4, 137.4, 128.5, 128.3, 127.4, 126.6, 73.9, 43.1; **TLC** R<sub>f</sub> 0.28

(EtOAc/hexane, 1/2); **HPLC conditions for 3a** : *t<sub>R</sub>* 17.04 min (*R*-isomer), 27.90 min (*S*-isomer) (Chiralpak AD-H, hexane/*i*-PrOH, 92/8, 1.0 mL/min, λ = 254 nm); **HRMS (ESI)** Calcd for C<sub>15</sub>H<sub>15</sub>NO<sub>2</sub> : 241.1103, found : 241.1103.

## 5.2 Method (b) (3b-r):<sup>3</sup>

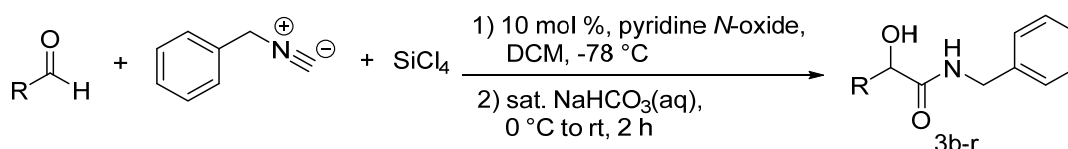

In a 100 mL, three-necked, round bottomed flask was placed pyridine *N*-oxide (38 mg, 0.4 mmol, 0.1 equiv) in 12 ml of anhydrous CH<sub>2</sub>Cl<sub>2</sub>. To this reaction mixture, respective aldehyde (4.0 mmol, 1.0 equiv) was added. Benzyl isocyanide (585 μl, 4.8 mmol, 1.2 equiv) in 10 mL of CH<sub>2</sub>Cl<sub>2</sub> was added dropwise through addition funnel at -78 °C, and then silicon tetrachloride (SiCl<sub>4</sub>, 504 μl, 4.4 mmol, 1.1 equiv) was slowly added to the reaction. After the reaction was completed, a sat. aqueous solution of NaHCO<sub>3</sub> (30 mL) was added under ice bath and stirred for two hours. A white precipitate of SiO<sub>2</sub> was formed, and the mixture was filtered through Celite to remove white solid. The resulting filtrate was extracted with CH<sub>2</sub>Cl<sub>2</sub> (30 mL × 3), dried (MgSO<sub>4</sub>), and evaporated to give a crude product. The crude product was purified by column chromatography on silica gel with EtOAc/hexanes as eluents. The purified product was recrystallized from hot benzene (20 mL) to give *N*-benzyl- $\alpha$ -hydroxy-amide derivatives in 48–92% yields.

## *N*-Benzyl-2-hydroxy-2-*p*-tolyl-acetamide (3b) <sup>1</sup>

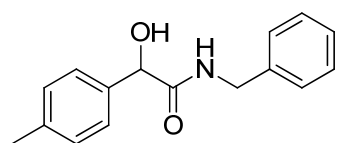

**Data for 3b** : <sup>1</sup>H NMR (CDCl<sub>3</sub>, 400 MHz) δ 7.33-7.28 (m, 5H), 7.20-7.17 (m, 4H), 6.35 (bs, 1H, NH), 5.06 (d, *J* = 3.3 Hz, 1H), 4.52-4.39 (m, 2H), 3.43 (d, *J* = 3.4 Hz, 1H), 2.35 (s, 1H); <sup>13</sup>C NMR

(CDCl<sub>3</sub>, 100 MHz)  $\delta$  172.6, 138.0, 137.6, 136.4, 129.2, 128.5, 127.4, 127.3, 126.5, 73.8, 43.0, 21.0; TLC R<sub>f</sub> 0.2 (EtOAc/hexane, 1/4); HPLC conditions for **3b** : t<sub>R</sub> 16.35 min (*R*-isomer), 28.10 min (*S*-isomer) (Chiralpak AD-H, hexane/*i*-PrOH, 92/8, 1.0 mL/min,  $\lambda$  = 254 nm); HRMS (ESI) Calcd for C<sub>16</sub>H<sub>17</sub>NO<sub>2</sub> : 255.1059, found : 255.1258.

### ***N*-Benzyl-2-hydroxy-2-(4'-methoxyphenyl)-acetamide (3c) <sup>1</sup>**

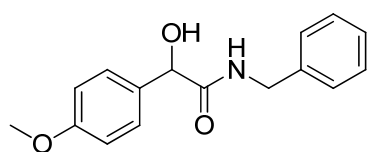

Data for **3c** : <sup>1</sup>H NMR (CDCl<sub>3</sub>, 400 MHz)  $\delta$  7.32-7.26 (m, 5H), 7.19 (d, *J* = 6.8 Hz, 2H), 6.88 (d, *J* = 8.6 Hz, 2H), 6.47 (bs, 1H, NH), 5.01 (d, *J* = 2.8 Hz, 1H), 4.49-4.37 (m, 2H), 4.38 (s, 1H), 3.54 (d, *J* = 3.2 Hz, 1H, OH); <sup>13</sup>C NMR (CDCl<sub>3</sub>, 100 MHz)  $\delta$  172.3, 159.8, 137.7, 131.5, 128.6, 128.1, 127.5, 114.2, 73.7, 55.2, 43.4; TLC R<sub>f</sub> 0.075 (EtOAc/hexane, 2/5); HPLC conditions for **3c** : t<sub>R</sub> 12.21 min (*R*-isomer), 21.55 min (*S*-isomer) (Chiralpak AD-H, hexane/*i*-PrOH, 85/15, 1.0 mL/min,  $\lambda$  = 254 nm); HRMS (ESI) Calcd for C<sub>16</sub>H<sub>17</sub>NO<sub>3</sub> : 271.1208, found : 271.1211.

### ***N*-Benzyl-2-hydroxy-2-(4'-chlorophenyl)-acetamide (3d) <sup>1</sup>**

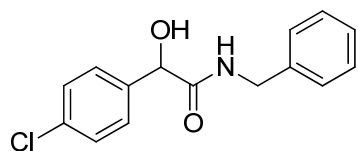

Data for **3d** : <sup>1</sup>H NMR (CDCl<sub>3</sub>, 400 MHz)  $\delta$  8.36 (d, *J* = 8.8 Hz, 2H), 7.46 (d, *J* = 8.5 Hz, 2H), 7.42 (bs, 1H, NH), 7.39-7.29 (m, 5H), 4.56 (d, *J* = 6.0 Hz, 2H); <sup>13</sup>C NMR (CDCl<sub>3</sub>, 100 MHz)  $\delta$  172.2, 137.9, 137.3, 133.9, 128.5, 128.4, 127.8, 127.4, 1327.3, 73.1, 43.0; TLC R<sub>f</sub> 0.175 (EtOAc/hexane, 1/2); HPLC conditions for **3d** : t<sub>R</sub> 14.30 min (*R*-isomer), 29.31 min (*S*-isomer) (Chiralpak AD-H, hexane/*i*-PrOH, 92/8, 1.0 mL/min,  $\lambda$  = 254 nm); HRMS (ESI) Calcd for C<sub>15</sub>H<sub>14</sub>ClNO<sub>2</sub> : 275.0713, found : 275.0716.

### ***N*-Benzyl-2-hydroxy-2-(4'-bromophenyl)-acetamide (3e) <sup>1</sup>**

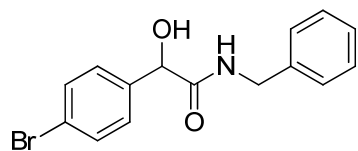

Data for **3e** : <sup>1</sup>H NMR (CDCl<sub>3</sub>, 400 MHz)  $\delta$  7.49 (d, *J* = 8.4 Hz, 2H), 7.36-7.26 (m, 5H), 7.18 (d, *J* = 7.2 Hz, 2H), 6.54 (bs, 1H, NH), 5.03 (d, *J* = 3.6 Hz, 1H), 4.47-4.37 (m, 2H), 3.59 (d, *J* = 3.6 Hz, 1H, OH); <sup>13</sup>C NMR (CDCl<sub>3</sub>, 100 MHz)  $\delta$  171.6, 138.3, 137.4, 131.7, 128.7, 128.3, 127.6, 127.5, 122.5, 73.4, 43.3; TLC R<sub>f</sub> 0.07 (EtOAc/hexane, 1/4); HPLC conditions for **3e** : t<sub>R</sub> 16.71 min (*R*-isomer), 36.24 min (*S*-isomer) (Chiralpak AD-H, hexane/*i*-PrOH, 92/8, 1.0 mL/min,  $\lambda$  = 254 nm); HRMS (ESI) Calcd for C<sub>15</sub>H<sub>14</sub>BrNO<sub>2</sub> : 319.0208, found :

319.0207.

### ***N*-Benzyl-2-hydroxy-2-naphthalen-2-yl-acetamide (3f)<sup>1</sup>**

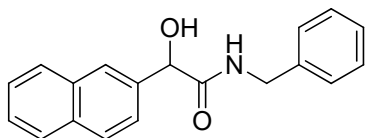

**Data for 3f :** <sup>1</sup>H NMR (DMSO-d<sub>6</sub>, 400 MHz) δ 8.63 (t, *J* = 6.0 Hz, 1H), 7.92-7.86 (m, 4H), 7.58 (d, *J* = 4.2 Hz, 1H), 7.63-7.47 (m, 2H), 7.27-7.18 (m, 5H), 6.38 (d, *J* = 3.6 Hz, 1H, NH), 5.14 (d, *J* = 3.5 Hz, 1H, OH), 4.34-4.24 (m, 2H); <sup>13</sup>C NMR (DMSO-d<sub>6</sub>, 100 MHz) δ 172.2, 139.6, 138.9, 132.6, 132.5, 128.2, 127.5, 127.5, 126.7, 126.2, 125.9, 125.3, 124.8, 73.7, 41.8; **TLC** R<sub>f</sub> 0.05 (EtOAc/hexane, 1/3); **HPLC conditions for 3f :** *t*<sub>R</sub> 10.39 min (*R*-isomer), 18.26 min (*S*-isomer) (Chiralpak AD-H, hexane/*i*-PrOH, 80/20, 1.0 mL/min, λ = 254 nm); **HRMS (ESI)** Calcd for C<sub>19</sub>H<sub>17</sub>NO<sub>2</sub> : 291.1259, found : 291.1258.

### ***N*-Benzyl-2-hydroxy-2-*m*-tolyl-acetamide (3g)<sup>4</sup>**

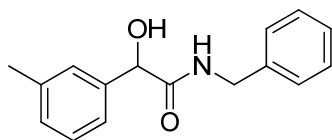

**Data for 3g :** <sup>1</sup>H NMR (CDCl<sub>3</sub>, 400 MHz) δ 7.33-7.23 (m, 4H), 7.20-7.13 (m, 5H), 6.45 (bs, 1H, NH), 5.02 (d, *J* = 3.2 Hz, 1H), 4.50-4.38 (m, 2H), 3.59 (d, *J* = 3.4 Hz, 1H), 2.34 (s, 1H); <sup>13</sup>C NMR (CDCl<sub>3</sub>, 100 MHz) δ 172.2, 139.3, 138.5, 137.7, 129.3, 128.6, 127.5, 127.4, 123.8, 74.1, 43.3, 21.3; **TLC** R<sub>f</sub> 0.15 (EtOAc/hexane, 1/2); **HPLC conditions for 3g :** *t*<sub>R</sub> 13.50 min (*R*-isomer), 22.21 min (*S*-isomer) (Chiralpak AD-H, hexane/*i*-PrOH, 92/8, 1.0 mL/min, λ = 254 nm); **HRMS (ESI)** Calcd for C<sub>16</sub>H<sub>18</sub>NO<sub>2</sub> : 256.1337 ([M+H]<sup>+</sup>), found : 256.1333 ([M+H]<sup>+</sup>).

### ***N*-Benzyl-2-hydroxy-2-(3'-methoxyphenyl)-acetamide (3h)**

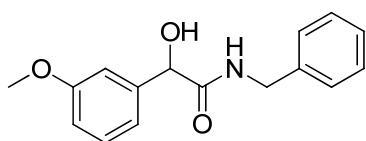

**Data for 3h :** <sup>1</sup>H NMR (CDCl<sub>3</sub>, 400 MHz) δ 7.32-7.24 (m, 4H), 7.18 (d, *J* = 1.7 Hz, 2H), 7.16 (s, 1H), 6.97 (d, *J* = 7.6 Hz, 1H), 6.93 (t, *J* = 2.2 Hz, 1H), 6.88-6.85 (m, 1H), 6.51 (bs, 1H, NH), 5.01 (d, *J* = 2.8 Hz, 1H), 4.48-4.36 (m, 2H), 3.77 (s, 3H), 3.75 (d, *J* = 3.2 Hz, 1H, OH); <sup>13</sup>C NMR (CDCl<sub>3</sub>, 100 MHz) δ 172.1, 159.8, 140.9, 137.6, 129.7, 128.6, 127.4, 119.0, 114.3, 111.9, 73.9, 55.1, 43.3; **TLC** R<sub>f</sub> 0.18 (EtOAc/hexane, 1/2); **HPLC conditions for 3h :** *t*<sub>R</sub> 12.06 min (*R*-isomer), 16.55 min (*S*-isomer) (Chiralpak AD-H, hexane/*i*-PrOH, 85/15, 1.0 mL/min, λ = 254 nm); **HRMS (ESI)** Calcd for C<sub>16</sub>H<sub>18</sub>NO<sub>3</sub> : 272.1286 ([M+H]<sup>+</sup>), found : 272.1288 ([M+H]<sup>+</sup>).

### ***N*-Benzyl-2-hydroxy-2-(3'-bromophenyl)-acetamide (3i)**

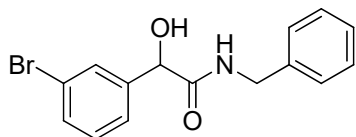

**Data for 3i :**  $^1\text{H NMR}$  ( $\text{CDCl}_3$ , 400 MHz)  $\delta$  7.58 (s, 1H), 7.47 (td,  $J = 8.0$  Hz, 0.8 Hz, 1H), 7.36-7.18 (m, 7H), 6.49 (bs, 1H, NH), 5.05 (d,  $J = 3.6$  Hz, 1H), 4.49-4.40 (m, 2H), 3.51 (d,  $J = 3.7$  Hz, 1H);  $^{13}\text{C NMR}$  ( $\text{CDCl}_3$ , 100 MHz)  $\delta$  171.4, 141.5, 137.4, 131.6, 130.2, 129.6, 128.6, 127.6, 127.5, 125.3, 122.7, 73.4, 43.4; **TLC**  $R_f$  0.08 (EtOAc/hexane, 1/3); **HPLC conditions for 3i :**  $t_R$  14.02 min (*R*-isomer), 21.79 min (*S*-isomer) (Chiralpak AD-H, hexane/*i*-PrOH, 92/8, 1.0 mL/min,  $\lambda = 254$  nm); **HRMS (ESI)** Calcd for  $\text{C}_{15}\text{H}_{15}\text{BrNO}_2$  : 320.0286 ( $[\text{M}+\text{H}]^+$ ), found : 320.0282 ( $[\text{M}+\text{H}]^+$ ).

### ***N*-Benzyl-2-hydroxy-2-(3',4'-dichlorophenyl)-acetamide (3j)**

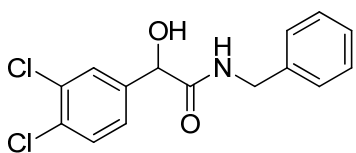

**Data for 3j :**  $^1\text{H NMR}$  ( $\text{CDCl}_3$ , 400 MHz)  $\delta$  7.53 (d,  $J = 2.0$  Hz, 1H), 7.43 (d,  $J = 8.2$  Hz, 1H), 7.35-7.19 (m, 6H), 6.62 (bs, 1H, NH), 5.04 (d,  $J = 3.8$  Hz, 1H), 4.47-4.36 (m, 2H), 3.57 (d,  $J = 4.0$  Hz, 1H, OH);  $^{13}\text{C NMR}$  ( $\text{CDCl}_3$ , 100 MHz)  $\delta$  171.1, 139.4, 137.3, 132.8, 132.5, 130.5, 128.7, 128.5, 127.7, 127.5, 125.9, 72.8, 43.4; **TLC**  $R_f$  0.08 (hexane/EtOAc, 3/1); **HPLC conditions for 3j :**  $t_R$  12.59 min (*R*-isomer), 24.86 min (*S*-isomer) (Chiralpak AD-H, hexane/*i*-PrOH, 92/8, 1.0 mL/min,  $\lambda = 254$  nm); **HRMS (ESI)** Calcd for  $\text{C}_{15}\text{H}_{14}\text{Cl}_2\text{NO}_2$  : 310.0396 ( $[\text{M}+\text{H}]^+$ ), found : 310.0401 ( $[\text{M}+\text{H}]^+$ ).

### ***N*-Benzyl-2-hydroxy-2-furan-2-yl -acetamide (3k) <sup>1</sup>**

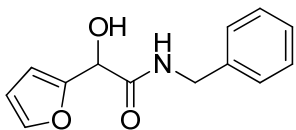

**Data for 3k :**  $^1\text{H NMR}$  ( $\text{CDCl}_3$ , 400 MHz)  $\delta$  7.38 (d,  $J = 1.6$  Hz, 1H), 7.34-7.22 (m, 5H), 6.70 (bs, 1H, NH), 6.38 (d,  $J = 3.2$  Hz, 1H), 6.35 (dd,  $J = 1.8$  Hz, 3.2 Hz, 1H), 5.14 (s, 1H), 4.53-4.43 (m, 2H), 3.84 (s, 1H);  $^{13}\text{C NMR}$  ( $\text{CDCl}_3$ , 100MHz)  $\delta$  169.9, 151.5, 142.9, 137.4, 128.7, 127.6, 127.5, 110.6, 108.7, 67.7, 43.5; **TLC**  $R_f$  0.1 (EtOAc/hexane, 1/2); **HPLC conditions for 3k :**  $t_R$  22.06 min (*R*-isomer), 28.14 min (*S*-isomer) (Chiralpak AD-H, hexane/*i*-PrOH, 92/8, 1.0 mL/min,  $\lambda = 254$  nm); **HRMS (ESI)** Calcd for  $\text{C}_{13}\text{H}_{14}\text{NO}_3$  : 232.0973 ( $[\text{M}+\text{H}]^+$ ), found : 232.0973 ( $[\text{M}+\text{H}]^+$ ).

### ***N*-Benzyl-2-hydroxy-2-thiophen-2-yl -acetamide (3l) <sup>1</sup>**

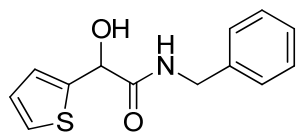

**Data for 3l :** <sup>1</sup>H NMR (CDCl<sub>3</sub>, 400 MHz) δ 7.34-7.21 (m, 6H), 7.12 (d, *J* = 3.6 Hz, 1H), 6.98 (dd, *J* = 3.5 Hz, 5.0 Hz, 1H), 6.53 (bs, 1H, NH), 5.37 (d, *J* = 4.0 Hz, 1H), 4.53-4.43 (m, 2H), 3.66 (d, *J* = 4.4 Hz, 1H, OH); <sup>13</sup>C NMR (CDCl<sub>3</sub>, 100 MHz) δ 171.1, 142.3, 137.4, 128.6, 127.5, 126.8, 126.0, 126.0, 70.1, 43.5; TLC R<sub>f</sub> 0.075 (EtOAc/hexane, 1/3); **HPLC conditions for 3l :** *t<sub>R</sub>* 18.51 min (*R*-isomer), 27.42 min (*S*-isomer) (Chiralpak AD-H, hexane/*i*-PrOH, 92/8, 1.0 mL/min, λ = 254 nm); **HRMS (ESI)** Calcd for C<sub>13</sub>H<sub>13</sub>NO<sub>2</sub>S : 247.0667, found : 247.0667.

### **2-Hydroxy-4-phenyl-but-3-enoic acid methylamide (3m) <sup>1</sup>**

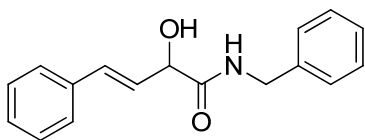

**Data for 3m :** <sup>1</sup>H NMR (CDCl<sub>3</sub>, 400 MHz) δ 7.40-7.26 (m, 10H), 6.75 (d, *J* = 15.7 Hz, 1H), 6.54 (bs, 1H, NH), 6.31 (dd, *J* = 7.0 Hz, 15.8 Hz, 1H), 4.77 (d, *J* = 6.8 Hz, 1H), 4.55-4.44 (m, 2H), 3.19 (bs, 1H, NH); <sup>13</sup>C NMR (CDCl<sub>3</sub>, 100 MHz) δ 171.6, 137.6, 135.7, 133.5, 128.7, 128.6, 128.2, 127.7, 127.6, 126.7, 126.6, 72.9, 43.6; TLC R<sub>f</sub> 0.2 (EtOAc/hexane, 2/5); **HPLC conditions for 3m :** *t<sub>R</sub>* 18.40 min (*R*-isomer), 26.94 min (*S*-isomer) (Chiralpak AD-H, hexane/*i*-PrOH, 92/8, 1.0 mL/min, λ = 254 nm); **HRMS (ESI)** Calcd for C<sub>17</sub>H<sub>17</sub>NO<sub>2</sub> : 267.1259, found : 267.1260.

### **2-Hydroxy-4-(4-methoxy-phenyl)-but-3-enoic acid methylamide (3n)**

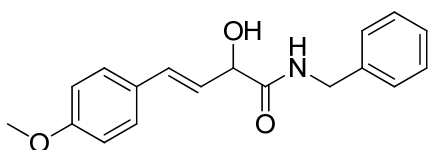

**Data for 3n :** <sup>1</sup>H NMR (CDCl<sub>3</sub>, 400 MHz) δ 7.36-7.27 (m, 7H), 6.85 (d, *J* = 8.7 Hz, 1H), 6.69 (d, *J* = 15.8 Hz, 1H), 6.54 (bs, 1H, NH), 6.15 (dd, *J* = 7.3 Hz, 15.8 Hz, 1H), 4.73 (dd, *J* = 3.5 Hz, 7.2 Hz, 1H), 4.54-4.43 (m, 2H), 3.81 (s, 1H), 3.21 (d, *J* = 3.7 Hz, 1H); <sup>13</sup>C NMR (CDCl<sub>3</sub>, 100 MHz) δ 171.9, 159.6, 137.6, 133.3, 128.7, 128.5, 127.9, 127.7, 127.6, 124.3, 114.0, 73.1, 55.2, 43.5 ; **TLC R<sub>f</sub>** 0.2 (EtOAc/hexane, 1/1); **HPLC conditions for 3n :** *t<sub>R</sub>* 18.32 min (*R*-isomer), 23.28 min (*S*-isomer) (Chiralpak AD-H, hexane/*i*-PrOH, 88/12, 1.0 mL/min, λ = 254 nm); **HRMS (ESI)** Calcd for C<sub>18</sub>H<sub>20</sub>NO<sub>3</sub> : 298.1443 ([M+H]<sup>+</sup>), found : 298.1440 ([M+H]<sup>+</sup>).

### ***N*-Benzyl-2-hydroxy-2-*o*-tolyl-acetamide (3o) <sup>1</sup>**

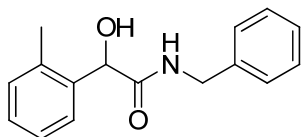

**Data for 3o :** <sup>1</sup>H NMR (CDCl<sub>3</sub>, 400 MHz) δ 7.34-7.27 (m, 4H), 7.24-7.17 (m, 5H), 6.37 (bs, 1H, NH), 5.27 (d, *J* = 3.0 Hz, 1H), 4.53-4.41 (m, 2H), 3.40 (d, *J* = 3.0 Hz, 1H), 2.40 (s, 3H); <sup>13</sup>C NMR (CDCl<sub>3</sub>, 100 MHz) δ 172.4, 137.7, 137.2, 136.8, 131.1, 128.6, 127.7, 127.6, 127.5, 126.3, 72.2, 43.4, 19.2; **TLC** *R<sub>f</sub>* 0.16 (EtOAc/hexane, 1/3); **HPLC conditions for 3o :** *t<sub>R</sub>* 16.11 min (*R*-isomer), 23.57 min (*S*-isomer) (Chiralpak AD-H, hexane/*i*-PrOH, 92/8, 1.0 mL/min, λ = 254 nm); **HRMS (ESI)** Calcd for C<sub>16</sub>H<sub>17</sub>NO<sub>2</sub> : 256.1337 ([M+H]<sup>+</sup>), found : 256.1336 ([M+H]<sup>+</sup>).

### ***N*-Benzyl-2-hydroxy-2-(2'-methoxyphenyl)-acetamide (3p) <sup>1</sup>**

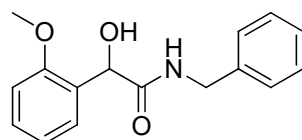

**Data for 3p :** <sup>1</sup>H NMR (CDCl<sub>3</sub>, 400 MHz) δ 7.48 (dd, *J* = 1.6 Hz, 7.4 Hz, 1H), 7.32-7.25 (m, 4H), 7.14 (d, *J* = 7.1 Hz, 2H), 7.03 (td, *J* = 1.6 Hz, 7.5 Hz, 1H), 6.91 (d, *J* = 8.2 Hz, 1H), 6.90 (bs, 1H, NH), 5.44 (d, *J* = 5.2 Hz, 1H), 4.53-4.37 (m, 2H), 4.16 (d, *J* = 5.2 Hz, 1H, OH), 3.81 (s, 3H); <sup>13</sup>C NMR (CDCl<sub>3</sub>, 100 MHz) δ: 172.7, 155.7, 137.8, 129.2, 128.6, 128.2, 127.4, 127.2, 121.6, 110.8, 68.2, 55.6, 43.6; **TLC** *R<sub>f</sub>* 0.25 (EtOAc/hexane, 1/2); **HPLC conditions for 3p :** *t<sub>R</sub>* 19.98 min (*R*-isomer), 25.78 min (*S*-isomer) (Chiralpak AD-H, hexane/*i*-PrOH, 88/12, 1.0 mL/min, λ = 254 nm); **HRMS (ESI)** Calcd for C<sub>16</sub>H<sub>17</sub>NO<sub>3</sub> : 271.1208, found : 271.1209.

### ***N*-Benzyl-2-hydroxy-2-(2'-chlorophenyl)-acetamide (3q) <sup>1</sup>**

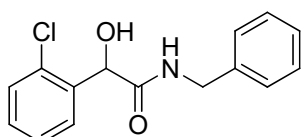

**Data for 3q :** <sup>1</sup>H NMR (CDCl<sub>3</sub>, 400 MHz) δ 7.48 (dd, *J* = 1.7 Hz, 7.4 Hz, 1H), 7.38 (dd, *J* = 1.2 Hz, 7.3 Hz, 1H), 7.33-7.26 (m, 5H), 7.18-7.16 (m, 2H), 6.47 (bs, 1H, NH), 5.56 (d, *J* = 3.6 Hz, H), 4.56-4.40 (m, 2H), 4.03 (d, *J* = 3.8 Hz, 1H); <sup>13</sup>C NMR (CDCl<sub>3</sub>, 100 MHz) δ 171.5, 137.4, 137.2, 132.6, 129.7, 128.6, 127.5, 127.5, 127.4, 70.2, 43.7; **TLC** *R<sub>f</sub>* 0.15 (EtOAc/hexane, 1/3); **HPLC conditions for 3q :** *t<sub>R</sub>* 21.18 min (*R*-isomer), 27.33 min (*S*-isomer) (Chiralpak AD-H, hexane/*i*-PrOH, 92/8, 1.0 mL/min, λ = 254 nm); **HRMS (ESI)** Calcd for C<sub>15</sub>H<sub>15</sub>ClNO<sub>2</sub> : 276.0791 ([M+H]<sup>+</sup>), found : 276.0789 ([M+H]<sup>+</sup>).

### ***N*-Benzyl-2-hydroxy-2-(2'-bromophenyl)-acetamide (3r) <sup>4</sup>**

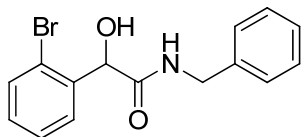

**Data for 3r :** <sup>1</sup>H NMR (CDCl<sub>3</sub>, 400 MHz) δ 7.55 (dd, *J* = 0.8 Hz, 8.0 Hz, 1H), 7.45 (dd, *J* = 1.7 Hz, 7.7 Hz, 1H), 7.36-7.26 (m, 4H), 7.21-7.16 (m, 3H), 6.56 (bs, 1H, NH), 5.54 (d, *J* = 4.4 Hz, 1H), 4.54-4.39 (m, 2H), 4.13 (d, *J* = 4.4 Hz, 1H, OH); <sup>13</sup>C NMR (CDCl<sub>3</sub>, 100 MHz) δ 171.4, 138.9, 137.3, 132.9, 130.0, 128.7, 128.2, 127.6, 127.3, 122.8, 72.3, 43.7; TLC *R<sub>f</sub>* 0.15 (EtOAc/hexane, 1/3); **HPLC conditions for 3r :** *t<sub>R</sub>* 24.57 min (*R*-isomer), 28.22 min (*S*-isomer) (Chiralpak AD-H, hexane/*i*-PrOH, 92/8, 1.0 mL/min, λ = 254 nm); **HRMS (ESI)** Calcd for C<sub>15</sub>H<sub>14</sub>BrNO<sub>2</sub> : 319.0208, found : 319.0207.

## *N*-Benzyl 2-Oxo-Benzeneacetamide Derivatives (2b-r)

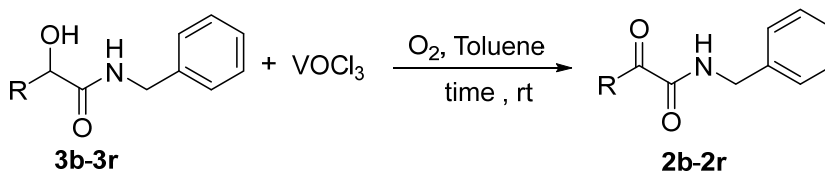

In a 100 ml double-neck round bottomed flask was placed respective *N*-benzyl,  $\alpha$ -hydroxy-amide derivative (3.0 mmol, 1.0 eq.) in oxygen saturated toluene (30 mL). VOCl<sub>3</sub> (Vanadium(V) oxychloride, 28 1, 0.3 mmol, 0.1 eq.) was added slowly to the reaction mixture and stirred at room temperature. After the completion of reaction, solvent was evaporated under reduced pressure and the crude mixture directly loaded on column chromatography. Ethyl acetate/hexane, 1/10 mixture was used as eluents to get the product and recrystallized from hot diethyl ether to get *N*-benzyl- $\alpha$ - keto-amide derivatives.

### *N*-Benzyl-2-oxo-2-*p*-tolyl-acetamide (2b) <sup>1</sup>

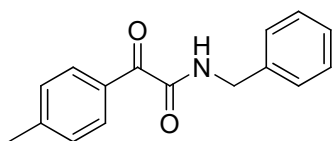

**Data for 2b :** <sup>1</sup>H NMR (CDCl<sub>3</sub>, 400 MHz)  $\delta$  8.29 (d, *J* = 8.0 Hz, 2H), 7.40 (bs, 1H, NH), 7.38-7.27 (m, 7H), 4.56 (d, *J* = 6.0 Hz, 2H), 2.43 (s, 1H); <sup>13</sup>C NMR (CDCl<sub>3</sub>, 100 MHz)  $\delta$  187.0, 161.8, 145.6, 137.1, 131.3, 130.7, 129.1, 128.7, 127.7, 127.6, 43.3, 21.8; **TLC R<sub>f</sub>**

0.2 (EtOAc/hexane, 1/10; **HRMS (ESI)** Calcd for C<sub>16</sub>H<sub>15</sub>NO<sub>2</sub> : 253.1103, found : 253.1102.

### *N*-Benzyl-2-oxo-2-(4'-methoxyphenyl)acetamide (2c) <sup>1</sup>

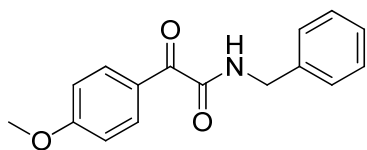

**Data for 2c :** <sup>1</sup>H NMR (CDCl<sub>3</sub>, 400 MHz)  $\delta$  8.43 (d, *J* = 9.2 Hz, 2H), 7.38 (bs, 1H, NH), 7.37-7.29 (m, 5H), 6.94 (d, *J* = 9.2 Hz, 2H), 4.56 (d, *J* = 6.4 Hz, 2H), 3.89 (s, 1H); <sup>13</sup>C NMR (CDCl<sub>3</sub>, 100 MHz)  $\delta$  185.4, 164.6, 162.0, 137.2, 133.9, 128.7, 127.8, 127.7,

126.3, 113.8, 55.5, 43.3; **TLC R<sub>f</sub>** 0.36 (EtOAc/hexane, 3/1); **HRMS (ESI)** Calcd for C<sub>16</sub>H<sub>15</sub>NO<sub>3</sub> : 269.1052, found : 269.1050 ([M+H]<sup>+</sup>).



### ***N*-Benzyl-2-oxo-2-(4'-chlorophenyl)-acetamide (2d) <sup>1</sup>**

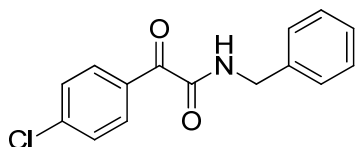

**Data for 2d :** <sup>1</sup>H NMR (CDCl<sub>3</sub>, 400 MHz) δ 8.36 (d, *J* = 8.5 Hz, 2H), 7.46 (d, *J* = 8.5 Hz, 2H), 7.42 (bs, 1H, NH), 4.56 (d, *J* = 6.0 Hz, 2H); <sup>13</sup>C NMR (CDCl<sub>3</sub>, 100 MHz) δ 186.0, 161.1, 141.1, 136.9, 132.6, 131.5, 128.7, 127.7, 43.4; TLC R<sub>f</sub> 0.525 (EtOAc/hexane, 1/3); HRMS (ESI) Calcd for C<sub>15</sub>H<sub>12</sub>ClNO<sub>2</sub> : 273.0557, found : 273.0556([M+H]<sup>+</sup>).

### ***N*-Benzyl-2-oxo-2-(4'-bromophenyl)-acetamide (2e) <sup>1</sup>**

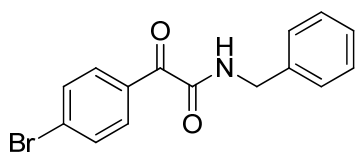

**Data for 2e :** <sup>1</sup>H NMR (CDCl<sub>3</sub>, 400 MHz) δ 8.28 (d, *J* = 8.8 Hz, 2H), 7.63 (d, *J* = 8.4 Hz, 2H), 7.41 (bs, 1H, NH), 7.41-7.30 (m, 5H), 4.56 (d, *J* = 6.0 Hz, 2H); <sup>13</sup>C NMR (CDCl<sub>3</sub>, 100 MHz) δ 186.3, 161.0, 136.9, 132.7, 132.0, 131.8, 130.1, 128.8, 127.8, 43.5; TLC R<sub>f</sub> 0.15 (EtOAc/hexane, 1/10); HRMS (ESI) Calcd for C<sub>15</sub>H<sub>12</sub>BrNO<sub>2</sub> : 317.0051 found : 317.0051.

### ***N*-Benzyl-2-oxo-2-naphthalen-2-yl-acetamide (2f) <sup>1</sup>**

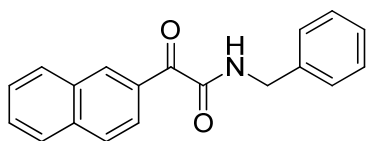

**Data for 2f :** <sup>1</sup>H NMR (CDCl<sub>3</sub>, 400 MHz) δ 9.25 (s, 1H), 8.21 (dd, *J* = 1.6 Hz, 8.6 Hz, 1H), 8.02 (d, *J* = 8.4 Hz, 1H), 7.90 (d, *J* = 8.8 Hz, 1H), 7.87 (d, *J* = 8.0 Hz, 1H), 7.64 (ddd, *J* = 1.2 Hz, 6.0 Hz, 7.0 Hz, 1H), 7.56 (ddd, *J* = 1.2 Hz, 6.0 Hz, 7.0 Hz, 1H), 7.55 (bs, 1H, NH), 7.40-7.30 (m, 5H), 4.62 (d, *J* = 6.0 Hz, 2H); <sup>13</sup>C NMR (CDCl<sub>3</sub>, 100 MHz) δ 187.0, 161.7, 137.1, 136.1, 135.0, 132.3, 130.5, 130.3, 129.3, 128.8, 128.3, 127.8, 127.8, 127.7, 126.8, 125.2, 43.5; TLC R<sub>f</sub> 0.44 (EtOAc/hexane, 1/3); HRMS (ESI) Calcd for C<sub>19</sub>H<sub>15</sub>NO<sub>2</sub> : 289.1103, found : 289.1103.

### ***N*-Benzyl-2-oxo-2-*m*-tolyl-acetamide (2g)<sup>4</sup>**

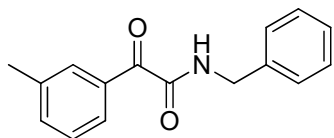

**Data for 2g :** <sup>1</sup>H NMR (CDCl<sub>3</sub>, 400 MHz) δ 8.18 (s, 1H), 8.16 (s, 1H), 7.44 (d, *J* = 7.6 Hz, 1H), 7.39-7.28 (m, 7H), 4.57 (d, *J* = 6.0 Hz, 2H), 2.42 (s, 1H); <sup>13</sup>C NMR (CDCl<sub>3</sub>, 100 MHz) δ 187.7, 161.6, 138.3, 137.1, 135.2, 133.3, 131.5, 128.8, 128.4, 128.4, 127.8, 127.8, 43.4, 21.3; TLC R<sub>f</sub> 0.2 (EtOAc/hexane, 10/1); HRMS (ESI) Calcd for C<sub>16</sub>H<sub>16</sub>NO<sub>2</sub> : 254.1181 ([M+H]<sup>+</sup>), found : 254.1178 ([M+H]<sup>+</sup>).

### ***N*-Benzyl-2-oxo-2-(3'-methoxyphenyl)-acetamide (2h)**

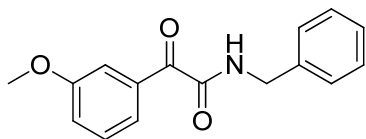

**Data for 2h :**  $^1\text{H NMR}$  ( $\text{CDCl}_3$ , 400 MHz)  $\delta$  8.02 (dt,  $J = 7.6$  Hz, 1.2 Hz, 1H), 7.86 (dd,  $J = 1.5$  Hz, 2.6 Hz, 1H), 7.42-7.31 (m, 7H), 7.18 (ddd,  $J = 8.2$  Hz, 2.7 Hz, 0.9 Hz, 1H), 4.57 (d,  $J = 6.0$  Hz, 2H), 3.86 (s, 3H);  $^{13}\text{C NMR}$  ( $\text{CDCl}_3$ , 100 MHz)  $\delta$  187.2, 161.5, 159.5, 137.0, 134.4, 129.5, 128.8, 127.8, 124.1, 121.5, 114.7, 55.4, 43.4; **TLC**  $R_f$  0.22 (EtOAc/hexane, 1/6); **HRMS (ESI)** Calcd for  $\text{C}_{16}\text{H}_{16}\text{NO}_3$  : 270.1130 ( $[\text{M}+\text{H}]^+$ ), found : 270.1133 ( $[\text{M}+\text{H}]^+$ ).

### ***N*-Benzyl-2-oxo-2-(3'-bromophenyl)-acetamide (2i)<sup>6</sup>**

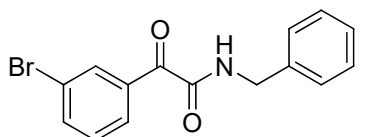

**Data for 2i :**  $^1\text{H NMR}$  ( $\text{CDCl}_3$ , 400 MHz)  $\delta$  8.51 (s, 1H), 8.34 (dd,  $J = 0.8$  Hz, 7.6 Hz, 1H), 7.75 (td,  $J = 1.0$  Hz, 7.8 Hz, 1H), 7.39-7.27 (m, 7H, NH), 4.57 (d,  $J = 6.0$  Hz, 2H);  $^{13}\text{C NMR}$  ( $\text{CDCl}_3$ , 100 MHz)  $\delta$  186.0, 160.8, 137.2, 136.8, 134.9, 133.9, 130.0, 129.8, 128.8, 127.9, 122.6, 43.5; **TLC**  $R_f$  0.5 (EtOAc/hexane, 1/3); **HRMS (ESI)** Calcd for  $\text{C}_{15}\text{H}_{13}\text{BrNO}_2$  : 318.0127 ( $[\text{M}+\text{H}]^+$ ), found : 318.0127 ( $[\text{M}+\text{H}]^+$ ).

### ***N*-Benzyl-2-oxo-2-(3',4'-dichlorophenyl)-acetamide (2j)**

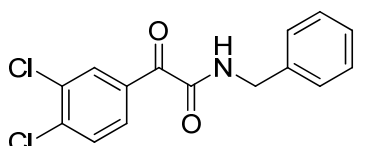

**Data for 2j :**  $^1\text{H NMR}$  ( $\text{CDCl}_3$ , 400 MHz)  $\delta$  8.54 (d,  $J = 1.9$  Hz, 1H), 8.27 (dd,  $J = 2.0$  Hz, 8.4 Hz, 1H), 7.56 (d,  $J = 8.4$  Hz, 1H), 7.43 (bs, 1H, NH), 7.39-7.29 (m, 5H), 4.56 (d,  $J = 6.0$  Hz, 2H);  $^{13}\text{C NMR}$  ( $\text{CDCl}_3$ , 100 MHz)  $\delta$  184.9, 160.6, 139.3, 136.7, 133.1, 133.0, 132.7, 130.6, 130.3, 128.8, 127.9, 127.8, 43.5; **TLC**  $R_f$  0.35 (EtOAc/hexane, 1/6); **HRMS (ESI)** Calcd for  $\text{C}_{15}\text{H}_{12}\text{Cl}_2\text{NO}_2$  : 308.0245 ( $[\text{M}+\text{H}]^+$ ), found : 308.0241 ( $[\text{M}+\text{H}]^+$ ).

### ***N*-Benzyl-2-oxo-2-furan-2-yl -acetamide (2k)<sup>1</sup>**

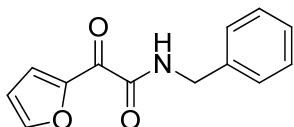

**Data for 2k :**  $^1\text{H NMR}$  ( $\text{CDCl}_3$ , 400 MHz)  $\delta$  8.22 (d,  $J = 3.5$  Hz, 1H), 7.76 (d,  $J = 3.5$  Hz, 1H), 7.60 (bs, 1H, NH), 7.37-7.30 (m, 5H), 6.63 (dd,  $J = 1.6$  Hz, 3.7 Hz, 1H), 4.54 (d,  $J = 6.0$  Hz, 2H);  $^{13}\text{C NMR}$  ( $\text{CDCl}_3$ , 100 MHz)  $\delta$  173.4, 159.9, 149.4, 136.8, 128.8, 127.8, 126.9, 113.1, 43.3; **TLC**  $R_f$  0.45 (EtOAc/hexane, 1/2); **HRMS (ESI)** Calcd for  $\text{C}_{13}\text{H}_{11}\text{NO}_3$  : 229.0739, found : 229.0739.

### ***N*-Benzyl-2-oxo-2-thiophen-2-yl -acetamide (2l) <sup>1</sup>**

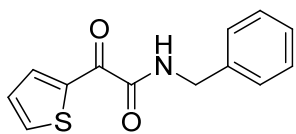

**Data for 15 :** <sup>1</sup>H NMR (CDCl<sub>3</sub>, 400 MHz) δ 8.42 (dd, *J* = 1.0 Hz, 3.5 Hz, 1H), 7.84 (dd, *J* = 1.1 Hz, 4.8 Hz, 1H), 7.62 (bs, 1H, NH), 7.38-7.28 (m, 5H), 7.19 (dd, *J* = 4.7 Hz, 4.0 Hz, 1H), 4.56 (d, *J* = 6.0 Hz, 2H); <sup>13</sup>C NMR (CDCl<sub>3</sub>, 100 MHz) δ 178.1, 160.5, 138.6, 138.0, 136.9, 136.7, 128.7, 128.1, 127.8, 127.7, 43.4; TLC R<sub>f</sub> 0.44 (EtOAc/hexane, 1/3); HRMS (ESI) Calcd for C<sub>13</sub>H<sub>11</sub>NO<sub>2</sub>S : 245.0510, found : 245.0509.

### **2-Oxo-4-phenyl-but-3-enoic acid methylamide (2m) <sup>1</sup>**

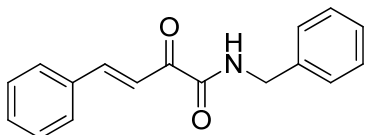

**Data for 2m :** <sup>1</sup>H NMR (CDCl<sub>3</sub>, 400 MHz) δ 7.96 (d, *J* = 16.4 Hz, 1H), 7.81 (d, *J* = 16.0 Hz, 1H), 7.68 (dd, *J* = 1.6 Hz, 7.4 Hz, 2H), 7.49 (bs, 1H, NH), 7.47-7.28 (m, 9H), 4.54 (d, *J* = 6.0 Hz, 2H); <sup>13</sup>C NMR (CDCl<sub>3</sub>, 100 MHz) δ 185.3, 161.1, 148.1, 137.0, 134.3, 131.4, 129.1, 129.0, 128.8, 127.8, 127.8, 118.6, 43.5; TLC R<sub>f</sub> 0.23 (EtOAc/hexane, 1/10); HRMS (ESI) Calcd for C<sub>17</sub>H<sub>15</sub>NO<sub>2</sub> : 265.1103, found : 265.1103.

### **2-oxo-4-(4-methoxy-phenyl)-but-3-enoic acid methylamide (2n)**

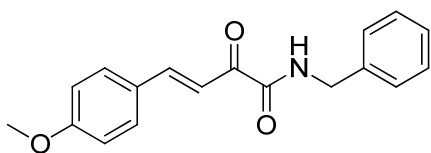

**Data for 2n :** <sup>1</sup>H NMR (CDCl<sub>3</sub>, 400 MHz) δ 7.93 (d, *J* = 16.0 Hz, 1H), 7.68 (d, *J* = 16.0 Hz, 1H), 7.64 (dd, *J* = 7.1 Hz, 1.9 Hz, 2H), 7.51 (bs, 1H, NH), 7.37-7.30 (m, 5H), 6.93 (dd, *J* = 6.9 Hz, 1.9 Hz, 2H), 4.54 (d, *J* = 6.1 Hz, 2H), 3.86 (s, 3H); <sup>13</sup>C NMR (CDCl<sub>3</sub>, 100 MHz) δ 185.0, 162.5, 161.4, 148.0, 137.1, 131.1, 128.8, 127.8, 127.7, 127.2, 116.5, 114.5, 55.4, 43.5; TLC R<sub>f</sub> 0.15 (EtOAc/hexane, 1/6); HRMS (ESI) Calcd for C<sub>18</sub>H<sub>18</sub>NO<sub>3</sub> : 296.1286, found : 296.1286 ([M+H]<sup>+</sup>).

### ***N*-Benzyl-2-oxo-2-*o*-tolyl-acetamide (2o) <sup>1</sup>**

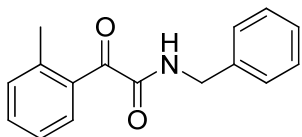

**Data for 2o :** <sup>1</sup>H NMR (CDCl<sub>3</sub>, 400 MHz) δ 7.97 (d, *J* = 7.8 Hz, 1H), 7.45 (td, *J* = 1.3 Hz, 8.7 Hz, 1H), 7.39-7.27 (m, 8H), 4.57 (d, *J* = 6.0 Hz, 2H), 2.50 (s, 3H); <sup>13</sup>C NMR (CDCl<sub>3</sub>, 100 MHz) δ 191.0, 161.8, 140.1, 137.1, 132.7, 132.6, 132.0, 131.6, 128.8, 127.8, 127.7, 125.3, 43.5, 20.8; TLC R<sub>f</sub> 0.45 (EtOAc/hexane, 1/3); HRMS (ESI) Calcd for C<sub>16</sub>H<sub>15</sub>NO<sub>2</sub> : 253.1103, found : 253.1102 ([M+H]<sup>+</sup>).

### ***N*-Benzyl-2-oxo-2-(2'-methoxyphenyl)-acetamide (2p)<sup>1</sup>**

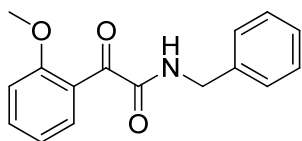

**Data for 2p :** <sup>1</sup>H NMR (CDCl<sub>3</sub>, 400 MHz) δ 7.68 (dd, *J* = 2.0 Hz, 7.6 Hz, 2H), 7.41 (ddd, *J* = 1.6 Hz, 7.4 Hz, 8.5 Hz, 1H), 7.38-7.28 (m, 5H), 7.03 (td, *J* = 0.8 Hz, 7.6 Hz, 1H), 6.97 (d, *J* = 8.0 Hz, 2H), 4.56 (d, *J* = 6.0 Hz, 2H), 3.79 (s, 3H); <sup>13</sup>C NMR (CDCl<sub>3</sub>, 100 MHz) δ 191.4, 163.0, 159.5, 137.4, 134.6, 131.0, 128.7, 127.8, 127.6, 124.6, 120.7, 111.9, 56.0, 43.3; TLC R<sub>f</sub> 0.35 (EtOAc/hexane, 1/2); HRMS (ESI) Calcd for C<sub>16</sub>H<sub>15</sub>NO<sub>3</sub> : 269.1052, found : 269.1050.

### ***N*-Benzyl-2-oxo-2-(2'-chlorophenyl)-acetamide (2q)<sup>1</sup>**

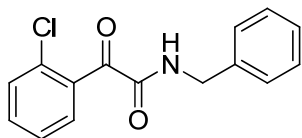

**Data for 2q :** <sup>1</sup>H NMR (CDCl<sub>3</sub>, 400 MHz) δ 7.71-7.69 (m, 1H), 7.50-7.44 (m, 3H), 7.39-7.32 (m, 6H, NH), 4.58 (d, *J* = 6.0 Hz, 2H); <sup>13</sup>C NMR (CDCl<sub>3</sub>, 100 MHz) δ 189.9, 160.5, 136.8, 133.9, 133.0, 131.2, 130.3, 128.7, 127.8, 127.8, 126.5, 43.6; TLC R<sub>f</sub> 0.4 (EtOAc/hexane, 1/3); HRMS (ESI) Calcd for C<sub>15</sub>H<sub>12</sub>ClNO<sub>2</sub> : 273.0557, found : 273.0557.

### ***N*-Benzyl-2-oxo-2-(2'-bromophenyl)-acetamide (2r)<sup>4</sup>**

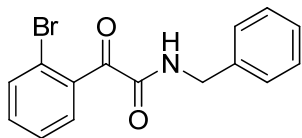

**Data for 2r :** <sup>1</sup>H NMR (CDCl<sub>3</sub>, 400 MHz) δ 7.66-7.63 (m, 2H), 7.44-7.30 (m, 8H), 4.57 (d, *J* = 6.4 Hz, 2H); <sup>13</sup>C NMR (CDCl<sub>3</sub>, 100 MHz) δ 190.5, 160.1, 136.8, 135.9, 133.45, 132.9, 131.1, 127.9, 127.8, 127.0, 120.8, 43.7; TLC R<sub>f</sub> 0.4 (EtOAc/hexane, 1/3); HRMS (ESI) Calcd for C<sub>15</sub>H<sub>12</sub>BrNO<sub>2</sub> : 317.0051, found : 317.0052.

### ***N*-Benzyl-2-oxo-2-naphthanlen-1-yl-acetamide (2s)<sup>1</sup>**

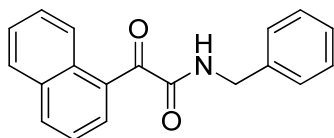

**Data for 2s :** <sup>1</sup>H NMR (CDCl<sub>3</sub>, 400 MHz) δ 8.58 (d, *J* = 8.4 Hz, 1H), 8.36 (dd, *J* = 1.2 Hz, 7.2 Hz, 1H), 8.08 (d, *J* = 8.4 Hz, 1H), 7.91 (dd, *J* = 0.8 Hz, 8.8 Hz, 1H), 7.64-7.53 (m, 3H), 7.52 (bs, 1H, NH), 7.44-7.31 (m, 5H), 4.63 (d, *J* = 6 Hz, 2H); <sup>13</sup>C NMR (CDCl<sub>3</sub>, 100 MHz) δ 190.1, 161.9, 137.1, 134.6, 133.8, 133.2, 131.1, 129.5, 128.8, 128.6, 128.4, 127.9, 127.8, 126.5, 124.2, 43.7; TLC R<sub>f</sub> 0.36 (EtOAc/hexane, 1/4); HRMS (ESI) Calcd for C<sub>19</sub>H<sub>15</sub>NO<sub>2</sub> : 289.1103, found : 289.1101.

## 6. Table S1: Effect of additives on the asymmetric reduction.

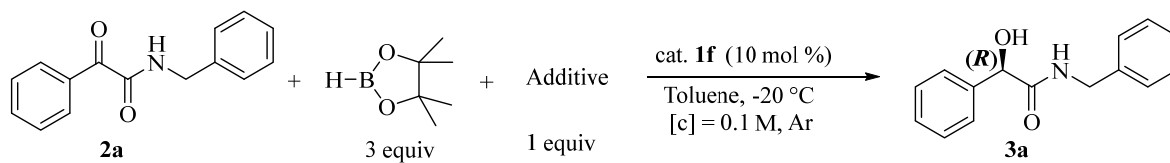

| Entry | Reducing Agent | Additive                            | Time (h) | Yield (%) | Ee (%)          |
|-------|----------------|-------------------------------------|----------|-----------|-----------------|
| 1     | PinB-H         | —                                   | 96       | 65        | 88 ( <i>R</i> ) |
| 2     | PinB-H         | MeOH                                | 96       | 40        | 99 ( <i>R</i> ) |
| 3     | PinB-H         | CCl <sub>3</sub> CH <sub>2</sub> OH | 96       | 47        | 91 ( <i>R</i> ) |
| 4     | PinB-H         | CF <sub>3</sub> CH <sub>2</sub> OH  | 96       | 22        | 96 ( <i>R</i> ) |
| 5     | CatB-H         | —                                   | 14       | 99        | 64 ( <i>S</i> ) |
| 6     | CatB-H         | MeOH                                | 14       | 92        | 47 ( <i>S</i> ) |
| 7     | CatB-H         | CCl <sub>3</sub> CH <sub>2</sub> OH | 14       | 86        | 58 ( <i>S</i> ) |
| 8     | CatB-H         | CF <sub>3</sub> CH <sub>2</sub> OH  | 14       | 84        | 62 ( <i>S</i> ) |

## Table S2: Solvent Screening with HBPIn:

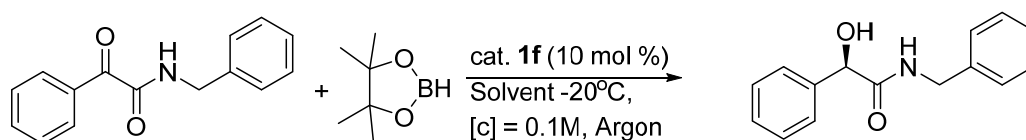

| entry     | Solvent        | Time(h)  | Yield(%) | ee%             |
|-----------|----------------|----------|----------|-----------------|
| 1 (final) | toluene        | 24+24+48 | 65       | 88 ( <i>R</i> ) |
| 2         | MeOH           | 24+24+48 | 35       | 52 ( <i>R</i> ) |
| 3         | <i>i</i> -PrOH | 24+24+48 | 43       | 56 ( <i>R</i> ) |
| 4         | 1,4-dioxane    | 24+24+48 | 21       | 36 ( <i>R</i> ) |

|   |                    |          |    |                 |
|---|--------------------|----------|----|-----------------|
| 5 | CH <sub>3</sub> CN | 24+24+48 | 28 | 38 ( <i>R</i> ) |
| 6 | DMSO (r.t.)        | 24+24+48 | 52 | 12 ( <i>R</i> ) |
| 7 | DMF                | 24+24+48 | 19 | 24 ( <i>R</i> ) |

**Table S3: Solvent Screening with HBCat:**

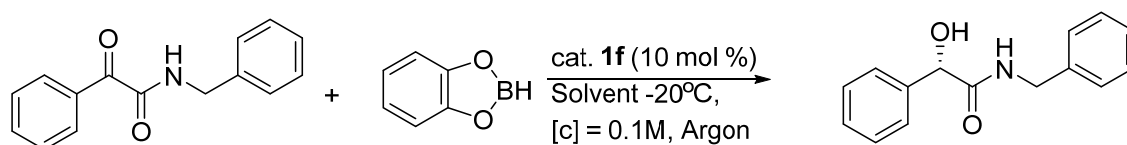

| entry     | Solvent                         | Time(h) | Yield(%) | ee%             |
|-----------|---------------------------------|---------|----------|-----------------|
| 1 (final) | toluene                         | 12      | 99       | 64 ( <i>S</i> ) |
| 2         | CH <sub>2</sub> Cl <sub>2</sub> | 12      | 97       | 2 ( <i>R</i> )  |
| 3         | PhCl                            | 14      | 95       | 57 ( <i>S</i> ) |
| 4         | THF                             | 12      | 98       | 35 ( <i>S</i> ) |
| 5         | <i>t</i> -BuOMe                 | 15      | 87       | 4 ( <i>R</i> )  |

**Table S4**

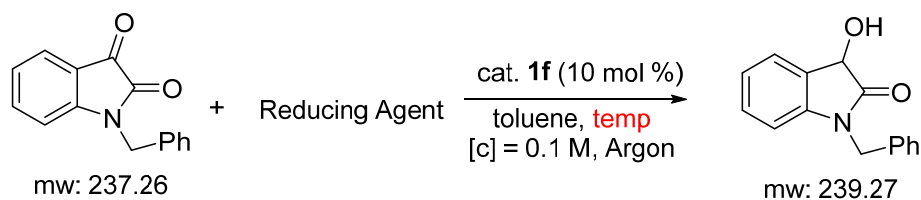

| reducing agent | temperature, °C | Yield, % | ee, % |
|----------------|-----------------|----------|-------|
|----------------|-----------------|----------|-------|

|       |         |       |         |
|-------|---------|-------|---------|
| HBPIn | -20/-40 | 99/0  | 0/---   |
| HBCat | -20/-40 | 92/28 | 2/8 (S) |

## 7. X-ray data of Catalyst 1f:

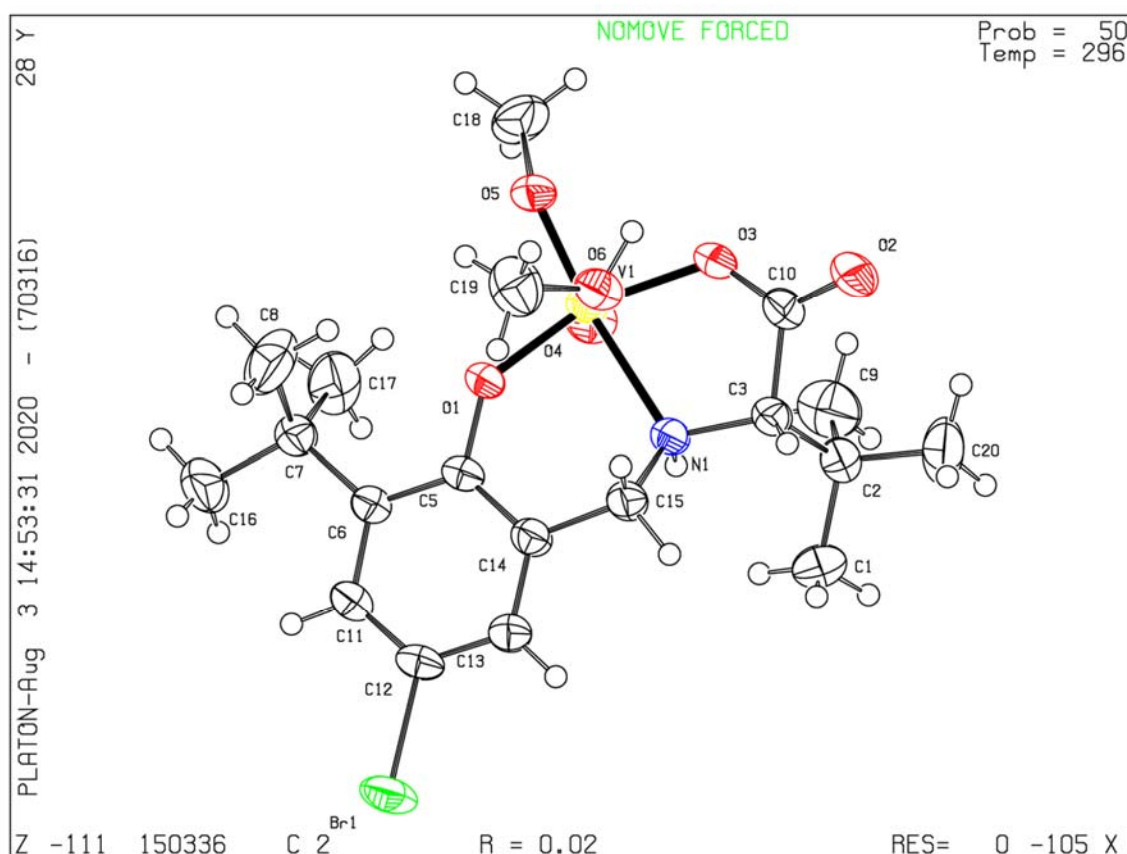

Figure S1. X-ray ORTEP drawing of catalyst **1f** (thermal ellipsoid is scaled to the 50% probability level).

Table 1. Crystal data and structure refinement for 150336.

|                     |                                                       |
|---------------------|-------------------------------------------------------|
| Identification code | 150336                                                |
| Empirical formula   | C <sub>19</sub> H <sub>31</sub> Br N O <sub>6</sub> V |
| Formula weight      | 500.30                                                |
| Temperature         | 296(2) K                                              |
| Wavelength          | 0.71073 Å                                             |

|                                   |                                             |                              |
|-----------------------------------|---------------------------------------------|------------------------------|
| Crystal system                    | Monoclinic                                  |                              |
| Space group                       | C 2                                         |                              |
| Unit cell dimensions              | a = 27.3247(8) Å                            | $\alpha = 90^\circ$ .        |
|                                   | b = 7.3295(2) Å                             | $\beta = 102.472(2)^\circ$ . |
|                                   | c = 11.7690(3) Å                            | $\gamma = 90^\circ$ .        |
| Volume                            | 2301.43(11) Å <sup>3</sup>                  |                              |
| Z                                 | 4                                           |                              |
| Density (calculated)              | 1.444 Mg/m <sup>3</sup>                     |                              |
| Absorption coefficient            | 2.199 mm <sup>-1</sup>                      |                              |
| F(000)                            | 1032                                        |                              |
| Crystal size                      | 0.15 x 0.15 x 0.12 mm <sup>3</sup>          |                              |
| Theta range for data collection   | 1.526 to 26.394°.                           |                              |
| Index ranges                      | -34 ≤ h ≤ 34, -9 ≤ k ≤ 9, -14 ≤ l ≤ 14      |                              |
| Reflections collected             | 10084                                       |                              |
| Independent reflections           | 4260 [R(int) = 0.0237]                      |                              |
| Completeness to theta = 25.242°   | 99.9 %                                      |                              |
| Absorption correction             | Semi-empirical from equivalents             |                              |
| Max. and min. transmission        | 0.9485 and 0.742                            |                              |
| Refinement method                 | Full-matrix least-squares on F <sup>2</sup> |                              |
| Data / restraints / parameters    | 4260 / 1 / 262                              |                              |
| Goodness-of-fit on F <sup>2</sup> | 0.558                                       |                              |
| Final R indices [I > 2σ(I)]       | R1 = 0.0249, wR2 = 0.0711                   |                              |
| R indices (all data)              | R1 = 0.0275, wR2 = 0.0762                   |                              |
| Absolute structure parameter      | 0.013(10)                                   |                              |
| Extinction coefficient            | n/a                                         |                              |
| Largest diff. peak and hole       | 0.561 and -0.339 e.Å <sup>-3</sup>          |                              |



## Datablock: 150336

Bond precision: C-C = 0.0058 Å Wavelength=0.71073  
Cell: a=27.3247(8) b=7.3295(2) c=11.7690(3)  
alpha=90 beta=102.472(2) gamma=90

Temperature: 296 K

|                        | Calculated        | Reported          |
|------------------------|-------------------|-------------------|
| Volume                 | 2301.43(11)       | 2301.43(11)       |
| Space group            | C 2               | C 2               |
| Hall group             | C 2y              | C 2y              |
| Moiety formula         | C19 H31 Br N O6 V | ?                 |
| Sum formula            | C19 H31 Br N O6 V | C19 H31 Br N O6 V |
| Mr                     | 500.29            | 500.30            |
| Dx, g cm <sup>-3</sup> | 1.444             | 1.444             |
| Z                      | 4                 | 4                 |
| Mu (mm <sup>-1</sup> ) | 2.199             | 2.199             |
| F000                   | 1032.0            | 1032.0            |
| F000'                  | 1032.50           |                   |
| h,k,lmax               | 34,9,14           | 34,9,14           |
| Nref                   | 4727[ 2556]       | 4260              |
| Tmin,Tmax              | 0.726,0.768       | 0.742,0.948       |
| Tmin'                  | 0.712             |                   |

Correction method= # Reported T Limits: Tmin=0.742  
Tmax=0.948 AbsCorr = MULTI-SCAN  
Data completeness= 1.67/0.90 Theta(max)= 26.394  
R(reflections)= 0.0249( 3926) wR2(reflections)= 0.0762( 4260)  
S = 0.558 Npar= 262

The following ALERTS were generated. Each ALERT has the format

**test-name\_ALERT\_alert-type\_alert-level.**

Click on the hyperlinks for more details of the test.

### Alert level B

[GOODF01\\_ALERT\\_2\\_B](#) The least squares goodness of fit parameter lies  
outside the range 0.60 <> 4.00  
Goodness of fit given = 0.558

### Alert level C

[PLAT242\\_ALERT\\_2\\_C](#) Low 'MainMol' Ueq as Compared to Neighbors of C2  
Check  
[PLAT242\\_ALERT\\_2\\_C](#) Low 'MainMol' Ueq as Compared to Neighbors of C7  
Check  
[PLAT420\\_ALERT\\_2\\_C](#) D-H Without Acceptor N1 --H1 . Please  
Check  
[PLAT911\\_ALERT\\_3\\_C](#) Missing FCF Refl Between Thmin & STh/L= 0.600 2  
Report  
[PLAT915\\_ALERT\\_3\\_C](#) No Flack x Check Done: Low Friedel Pair Coverage 79  
%

|                                   |                                                        |       |
|-----------------------------------|--------------------------------------------------------|-------|
| <a href="#">PLAT915_ALERT_3_C</a> | No Flack x Check Done: Low Friedel Pair Coverage %     | 79    |
| <a href="#">PLAT918_ALERT_3_C</a> | Reflection(s) with I(obs) much Smaller I(calc) . Check | 1     |
| <a href="#">PLAT939_ALERT_3_C</a> | Large Value of Not (SHELXL) Weight Optimized S . Check | 15.00 |

---

### ● Alert level G

|                                   |                                                         |        |
|-----------------------------------|---------------------------------------------------------|--------|
| <a href="#">PLAT007_ALERT_5_G</a> | Number of Unrefined Donor-H Atoms .....                 | 2      |
| <a href="#">PLAT128_ALERT_4_G</a> | Alternate Setting for Input Space Group C2 Note         | 12     |
| <a href="#">PLAT169_ALERT_4_G</a> | The CIF-Embedded .res File Contains AFIX 1 Recds Report | 1      |
| <a href="#">PLAT791_ALERT_4_G</a> | Model has Chirality at N1 (Sohnke SpGr) Verify          | R      |
| <a href="#">PLAT791_ALERT_4_G</a> | Model has Chirality at C3 (Sohnke SpGr) Verify          | S      |
| <a href="#">PLAT794_ALERT_5_G</a> | Tentative Bond Valency for V1 (V) . Info                | 5.18   |
| <a href="#">PLAT883_ALERT_1_G</a> | No Info/Value for _atom_sites_solution_primary . Do !   | Please |
| <a href="#">PLAT912_ALERT_4_G</a> | Missing # of FCF Reflections Above STh/L= 0.600 Note    | 8      |
| <a href="#">PLAT913_ALERT_3_G</a> | Missing # of Very Strong Reflections in FCF .... Note   | 1      |
| <a href="#">PLAT941_ALERT_3_G</a> | Average HKL Measurement Multiplicity .....              | 4.0    |
| <a href="#">PLAT965_ALERT_2_G</a> | The SHELXL WEIGHT Optimisation has not Converged Check  | Please |
| <a href="#">PLAT978_ALERT_2_G</a> | Number C-C Bonds with Positive Residual Density. Info   | 4      |

---

0 **ALERT level A** = Most likely a serious problem - resolve or explain  
1 **ALERT level B** = A potentially serious problem, consider carefully  
8 **ALERT level C** = Check. Ensure it is not caused by an omission or oversight  
12 **ALERT level G** = General information/check it is not something unexpected

1 ALERT type 1 CIF construction/syntax error, inconsistent or missing data  
6 ALERT type 2 Indicator that the structure model may be wrong or deficient  
7 ALERT type 3 Indicator that the structure quality may be low  
5 ALERT type 4 Improvement, methodology, query or suggestion  
2 ALERT type 5 Informative message, check

---

## 8. References

1. S. S. Weng, M. W. Shen, J. Q. Kao, Y. S. Munot, C. T. Chen, Chiral N-Salicylidene Vanadyl Carboxylate-Catalyzed Enantioselective Aerobic Oxidation of  $\alpha$ -Hydroxy Esters and Amides, *Proc. Natl. Acad. Sci. U S A* **2006**, *103*, 3522-3527.
2. S. E.; Denmark, Y. Fan, The First Catalytic, Asymmetric  $\alpha$ -Additions of Isocyanides. Lewis-Base-Catalyzed, Enantioselective Passerini-Type Reactions., *J. Am. Chem. Soc.* **2003**, *125*, 7825-

7827.

3. I. Shin, M. R. Lee, J. Lee, M. Jung, W. Lee and J. Yoon, Synthesis of Optically Active Phthaloyl D-Aminooxy Acids from L-Amino Acids or L-Hydroxy Acids as Building Blocks for the Preparation of Aminooxy Peptides, *J. Org. Chem* **2000**, *65*, 7667.

4. G. Gu, T. Yang, O. Yu, H. Qian, J. Wang, J. Wen, L. Dang and X. Zhang, Enantioselective Iridium-Catalyzed Hydrogenation of  $\alpha$ -Keto Amides to  $\alpha$ -Hydroxy Amides, *Org. Lett.*, 2017, **19**, 5920–5923.

5. Y.-K. Zhang and B. Wang, European, Synthesis of  $\alpha$ -Ketoamides from  $\beta$ -Ketonitriles and Primary Amines: A Catalyst-Free Oxidative Decyanation–Amidation Reaction, *J. Org. Chem.*, 2019, **2019**, 5732–5735.

6. Q. W. Tan, P. Chovatia and M. C. Willis, Copper-Catalysed Synthesis of Alkylidene 2-Pyrrolinone Derivatives from the Combination of  $\alpha$ -Keto Amides and Alkynes, *Org. Biomol. Chem.*, 2018, **16**, 7797–7800.

## 9. HPLC chromatograms:

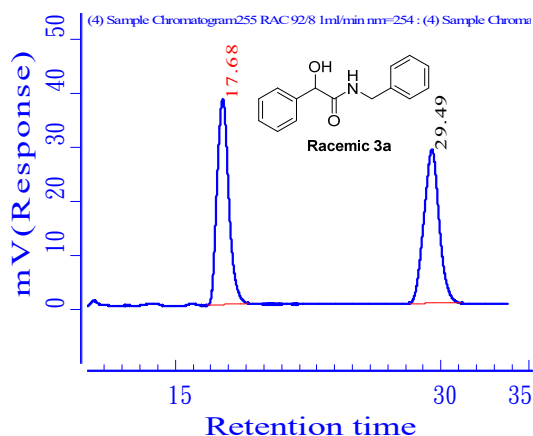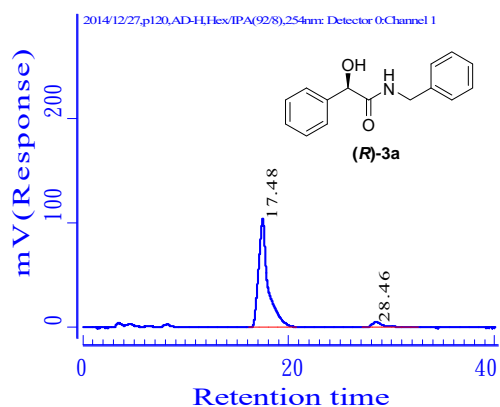

| # | Peak name | x/min (min) | Area    | Area % | Assay % |
|---|-----------|-------------|---------|--------|---------|
| 0 |           | 17.682      | 1761.21 | 50.72  | 0.00    |
| 1 |           | 29.485      | 1711.11 | 49.28  | 0.00    |

| # | Peak name | x/min (min) | Area    | Area % | Assay % |
|---|-----------|-------------|---------|--------|---------|
| 0 |           | 17.484      | 6668.31 | 94.05  | 0.00    |
| 1 |           | 28.462      | 421.77  | 5.95   | 0.00    |

HPLC conditions for **3a** :  $t_R$  17.68 min (major **R**-iosmer), 29.49 min (**S**-isomer)  
(Chiralpak AD-H, hexane/*i*-PrOH, 92/8, 1.0 ml/min,  $\lambda = 254$  nm) for 88% ee (**R**)

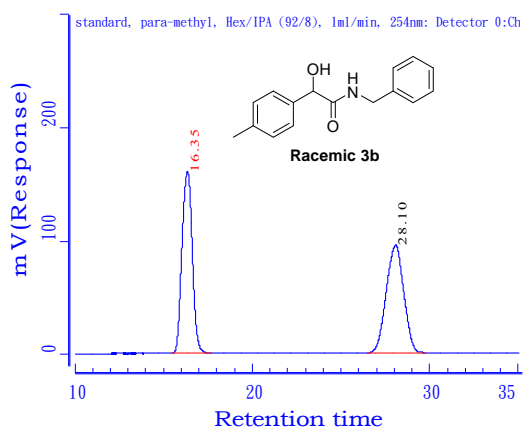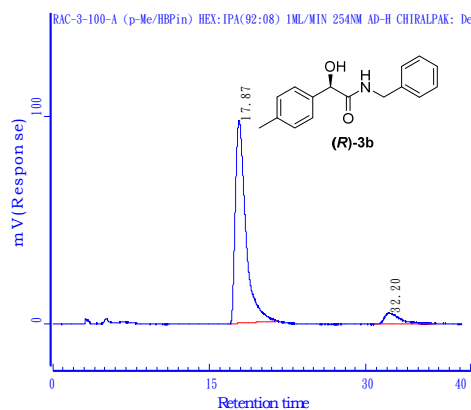

| # | Peak name | max/min (min) | Area    | Area % | Assay % |
|---|-----------|---------------|---------|--------|---------|
| 0 |           | 16.354        | 6491.10 | 49.87  | 0.00    |
| 1 |           | 28.096        | 6524.62 | 50.13  | 0.00    |

| # | Peak name | ax/min (min) | Area    | Area % | Assay % |
|---|-----------|--------------|---------|--------|---------|
| 0 |           | 17.866       | 6814.76 | 92.32  | 0.00    |
| 1 |           | 32.201       | 566.64  | 7.68   | 0.00    |

HPLC conditions for **3b** :  $t_R$  16.35 min (major **R**-iosmer), 28.10 min (**S**-isomer)  
(Chiralpak AD-H, hexane/*i*-PrOH, 92/8, 1.0 ml/min,  $\lambda = 254$  nm) for 85% ee (**R**).

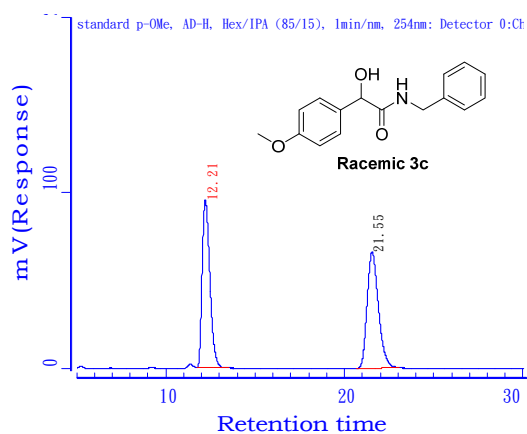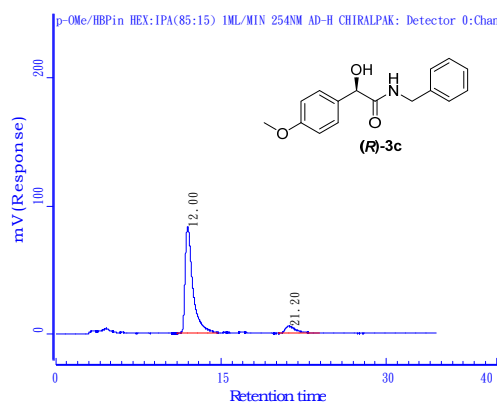

| # | Peak name | max/min (min) | Area    | Area % | Assay % |
|---|-----------|---------------|---------|--------|---------|
| 0 |           | 12.212        | 2869.52 | 49.68  | 0.00    |
| 1 |           | 21.554        | 2906.32 | 50.32  | 0.00    |

| # | Peak name | ax/min (min) | Area    | Area % | Assay % |
|---|-----------|--------------|---------|--------|---------|
| 0 |           | 11.995       | 4028.13 | 91.04  | 0.00    |
| 1 |           | 21.201       | 396.56  | 8.96   | 0.00    |

HPLC conditions for **3c** :  $t_R$  12.21 min (major **R**-iosmer), 21.55 min (**S**-isomer)  
(Chiralpak AD-H, hexane/*i*-PrOH, 85/15, 1.0 ml/min,  $\lambda = 254$  nm) for 82% ee (**R**).

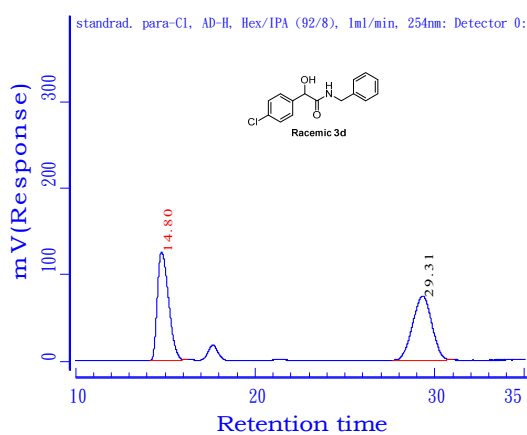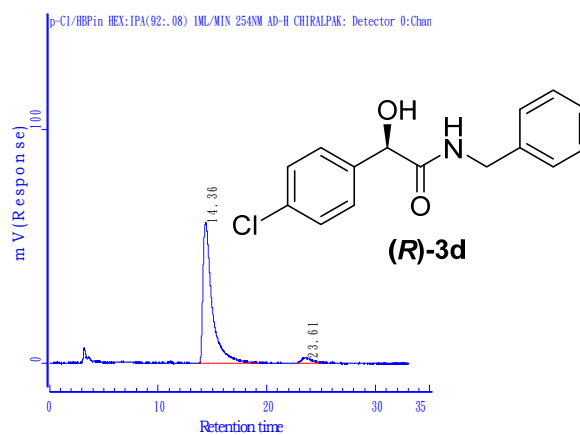

| # | Peak name | max/min (min) | Area    | Area % | Assay % |
|---|-----------|---------------|---------|--------|---------|
| 0 |           | 14.800        | 5462.06 | 49.93  | 0.00    |
| 1 |           | 29.312        | 5478.30 | 50.07  | 0.00    |

| # | Peak name | ax/min (min) | Area    | Area % | Assay % |
|---|-----------|--------------|---------|--------|---------|
| 0 |           | 14.358       | 3538.19 | 96.27  | 0.00    |
| 1 |           | 23.606       | 137.24  | 3.73   | 0.00    |

HPLC conditions for **3d** :  $t_R$  14.30 min (major **R**-iosmer), 29.31 min (**S**-isomer)  
(Chiralpak AD-H, hexane/*i*-PrOH, 92/8, 1.0 ml/min,  $\lambda = 254$  nm) for 93% ee (**R**).

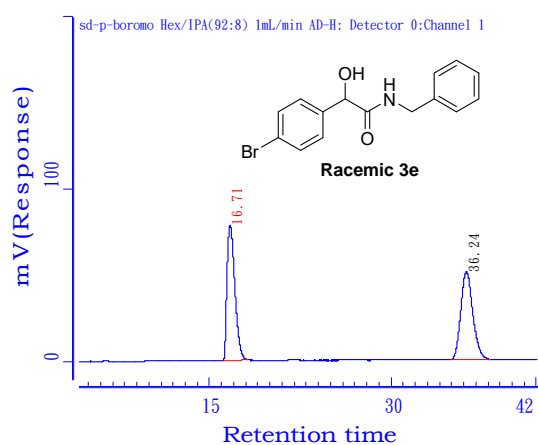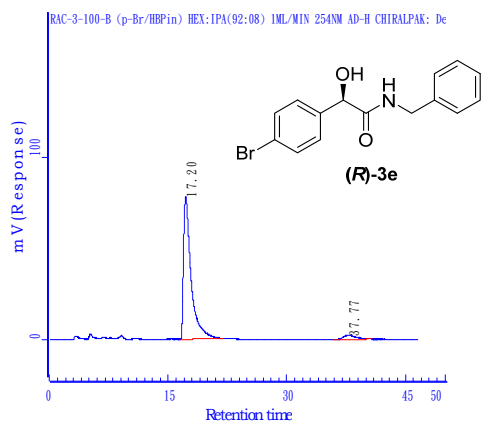

| # | Peak name | ax/min (min) | Area    | Area % | Assay % | # | Peak name | ax/min (min) | Area    | Area % | Assay % |
|---|-----------|--------------|---------|--------|---------|---|-----------|--------------|---------|--------|---------|
| 0 |           | 16.712       | 3511.85 | 49.93  | 0.00    | 0 |           | 17.197       | 5247.14 | 95.67  | 0.00    |
| 1 |           | 36.236       | 3522.01 | 50.07  | 0.00    | 1 |           | 37.770       | 237.55  | 4.33   | 0.00    |

HPLC conditions for **3e** :  $t_R$  16.71 min (major **R**-iosmer), 36.24 min (**S**-isomer) (Chiralpak AD-H, hexane/*i*-PrOH, 92/8, 1.0 ml/min,  $\lambda = 254$  nm) for 91% ee (**R**).

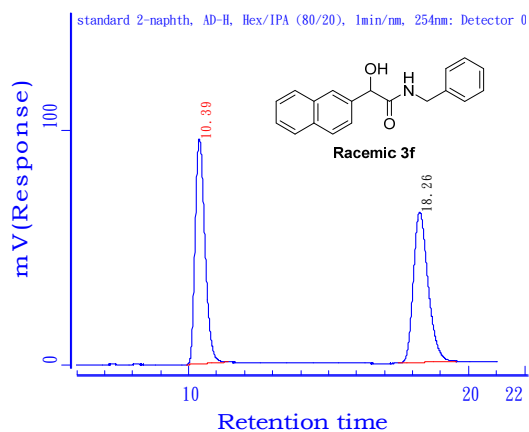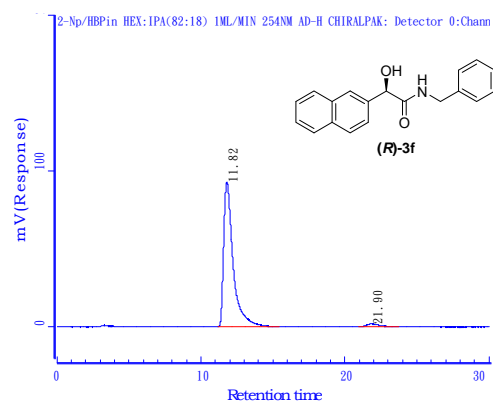

| # | Peak name | ax/min (min) | Area    | Area % | Assay % | # | Peak name | ax/min (min) | Area    | Area % | Assay % |
|---|-----------|--------------|---------|--------|---------|---|-----------|--------------|---------|--------|---------|
| 0 |           | 10.388       | 2339.20 | 50.02  | 0.00    | 0 |           | 11.817       | 4249.61 | 97.15  | 0.00    |
| 1 |           | 18.259       | 2337.73 | 49.98  | 0.00    | 1 |           | 21.898       | 124.78  | 2.85   | 0.00    |

HPLC conditions for **3f** :  $t_R$  10.39 min (major **R**-iosmer), 18.26 min (**S**-isomer) (Chiralpak AD-H, hexane/*i*-PrOH, 80/20, 1.0 ml/min,  $\lambda = 254$  nm) for 94% ee (**R**).

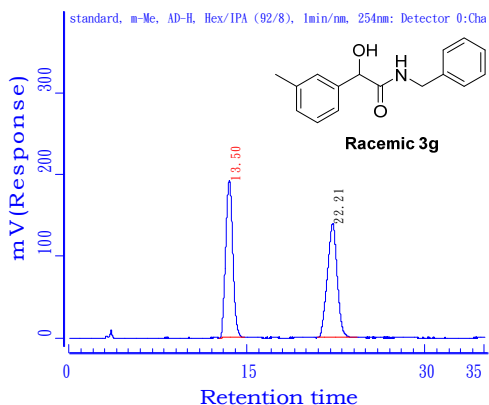

| # | Peak name | max/min (min) | Area    | Area % | Assay % |
|---|-----------|---------------|---------|--------|---------|
| 0 |           | 13.501        | 8072.94 | 49.88  | 0.00    |
| 1 |           | 22.210        | 8112.04 | 50.12  | 0.00    |

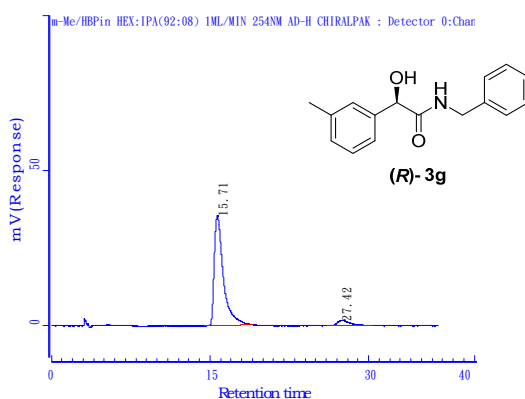

| # | Peak name | ax/min (min) | Area    | Area % | Assay % |
|---|-----------|--------------|---------|--------|---------|
| 0 |           | 15.715       | 2137.57 | 93.23  | 0.00    |
| 1 |           | 27.420       | 155.19  | 6.77   | 0.00    |

HPLC conditions for **3g** :  $t_R$  13.50 min (major **R**-iosmer), 22.21 min (**S**-isomer) (Chiralpak AD-H, hexane/*i*-PrOH, 92/8, 1.0 ml/min,  $\lambda = 254$  nm) for 86% ee (**R**).

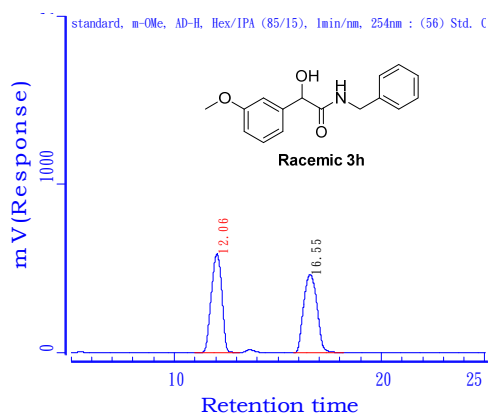

| # | Peak name | max/min (min) | Area     | Area % | Assay % |
|---|-----------|---------------|----------|--------|---------|
| 0 |           | 12.058        | 20649.21 | 49.89  | 0.00    |
| 1 |           | 16.553        | 20737.65 | 50.11  | 0.00    |

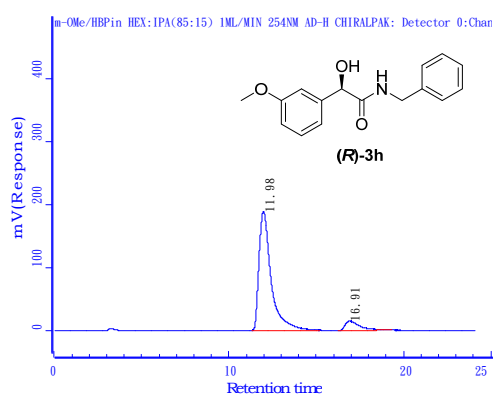

| # | Peak name | ax/min (min) | Area    | Area % | Assay % |
|---|-----------|--------------|---------|--------|---------|
| 0 |           | 11.983       | 9155.65 | 91.41  | 0.00    |
| 1 |           | 16.911       | 860.30  | 8.59   | 0.00    |

HPLC conditions for **3h** :  $t_R$  12.06 min (major **R**-iosmer), 16.55 min (**S**-isomer) (Chiralpak AD-H, hexane/*i*-PrOH, 85/15, 1.0 ml/min,  $\lambda = 254$  nm) for 83% ee (**R**).

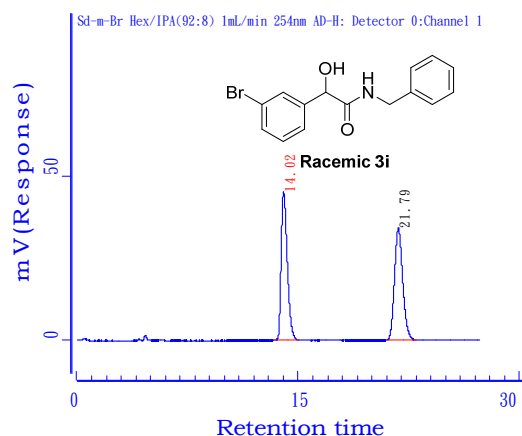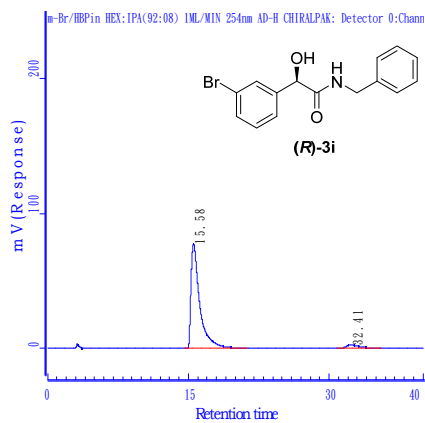

| # | Peak name | α/min (min) | Area    | Area % | Assay % |
|---|-----------|-------------|---------|--------|---------|
| 0 |           | 14.022      | 1308.88 | 49.52  | 0.00    |
| 1 |           | 21.789      | 1334.19 | 50.48  | 0.00    |

| # | Peak name | α/min (min) | Area    | Area % | Assay % |
|---|-----------|-------------|---------|--------|---------|
| 0 |           | 15.577      | 5073.37 | 95.49  | 0.00    |
| 1 |           | 32.406      | 239.47  | 4.51   | 0.00    |

HPLC conditions for **3i** :  $t_R$  14.02 min (major **R**-iosmer), 21.79 min (**S**-isomer) (Chiralpak AD-H, hexane/*i*-PrOH, 92/8, 1.0 ml/min,  $\lambda = 254$  nm) for 91% ee (**R**).

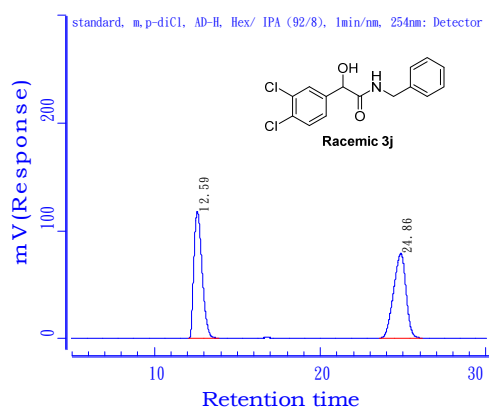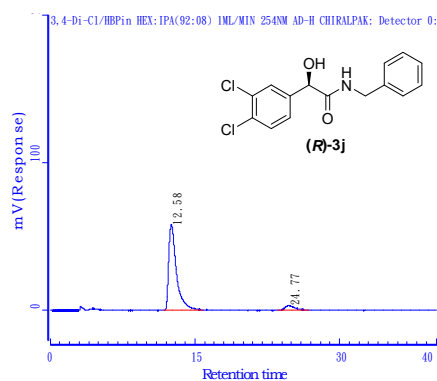

| # | Peak name | max/min (min) | Area    | Area % | Assay % |
|---|-----------|---------------|---------|--------|---------|
| 0 |           | 12.586        | 4074.42 | 49.80  | 0.00    |
| 1 |           | 24.858        | 4106.63 | 50.20  | 0.00    |

| # | Peak name | α/min (min) | Area    | Area % | Assay % |
|---|-----------|-------------|---------|--------|---------|
| 0 |           | 12.576      | 3250.54 | 93.27  | 0.00    |
| 1 |           | 24.768      | 234.55  | 6.73   | 0.00    |

HPLC conditions for **3j** :  $t_R$  12.59 min (major **R**-iosmer), 24.86 min (**S**-isomer) (Chiralpak AD-H, hexane/*i*-PrOH, 92/8, 1.0 ml/min,  $\lambda = 254$  nm) for 87% ee.



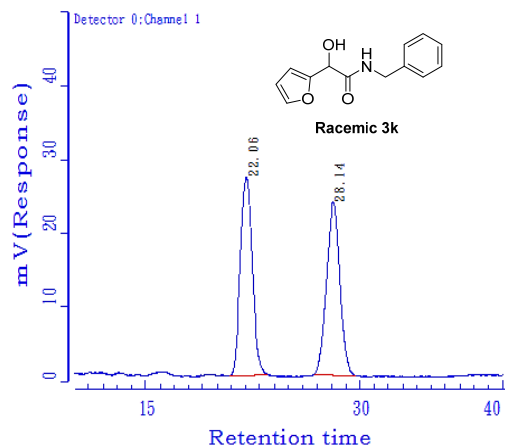

| # | Peak name | x/min (min) | Area    | Area % | Assay % |
|---|-----------|-------------|---------|--------|---------|
| 0 |           | 22.065      | 1560.10 | 50.33  | 0.00    |
| 1 |           | 28.144      | 1539.55 | 49.67  | 0.00    |

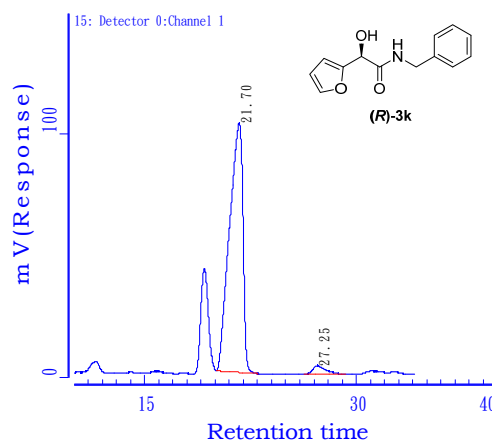

| # | Peak name | x/min (min) | Area    | Area % | Assay % |
|---|-----------|-------------|---------|--------|---------|
| 0 |           | 21.704      | 6793.19 | 96.85  | 0.00    |
| 1 |           | 27.245      | 220.89  | 3.15   | 0.00    |

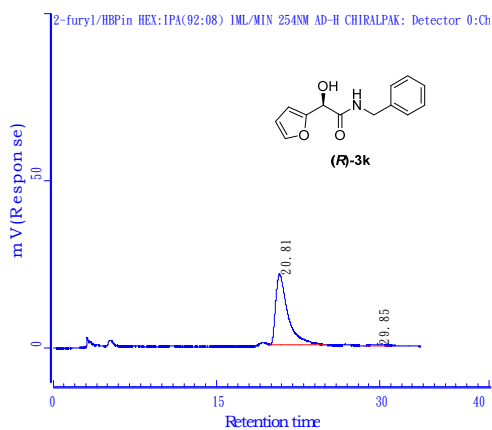

| # | Peak name | ax/min (min) | Area    | Area % | Assay % |
|---|-----------|--------------|---------|--------|---------|
| 0 |           | 20.815       | 1650.71 | 98.01  | 0.00    |
| 1 |           | 29.852       | 33.54   | 1.99   | 0.00    |

HPLC conditions for **3k** :  $t_R$  22.06 min (major **R**-iosmer), 28.14 min (**S**-isomer) (Chiralpak AD-H, hexane/*i*-PrOH, 92/8, 1.0 ml/min,  $\lambda = 254$  nm) for 94% ee (**R**) and 96% ee (**R**).

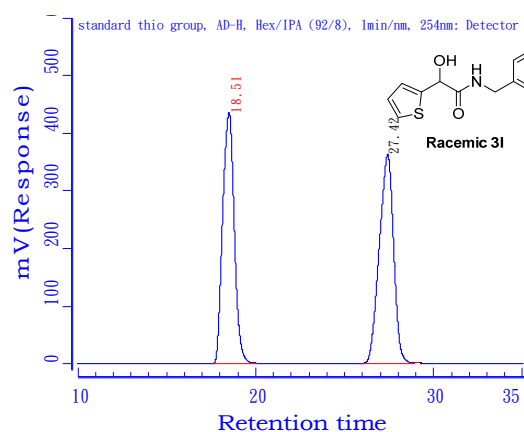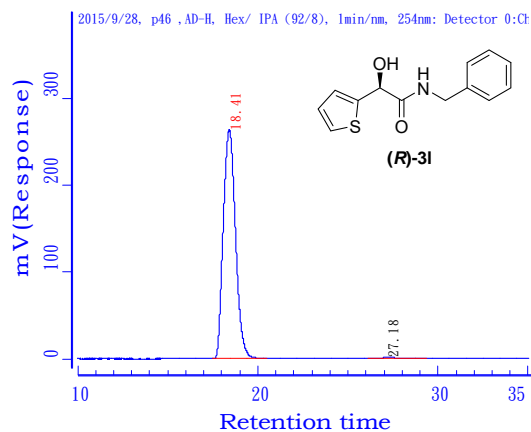

| # | Peakname | max/min (min) | Area     | Area % | Assay % | # | Peakname | max/min (min) | Area     | Area % | Assay % |
|---|----------|---------------|----------|--------|---------|---|----------|---------------|----------|--------|---------|
| 0 |          | 18.508        | 19638.88 | 49.29  | 0.00    | 0 |          | 18.414        | 12423.07 | 99.62  | 0.00    |
| 1 |          | 27.419        | 20202.77 | 50.71  | 0.00    | 1 |          | 27.179        | 47.99    | 0.38   | 0.00    |

HPLC conditions for **3I** :  $t_R$  18.51 min (major **R**-iosmer), 27.42 min (**S**-isomer)  
(Chiralpak AD-H, hexane/*i*-PrOH, 92/8, 1.0 ml/min,  $\lambda = 254$  nm) for 99% ee (**R**).

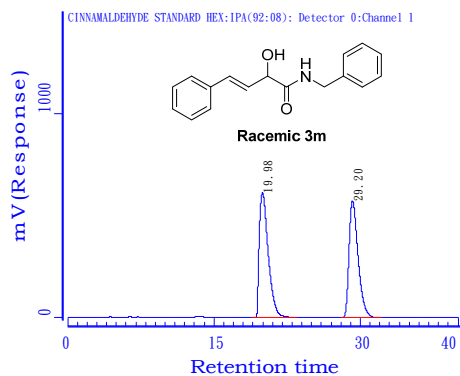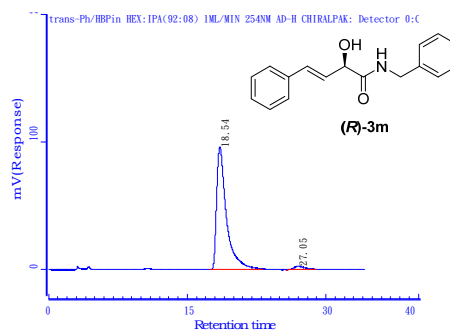

| # | Peak name | ax/min (min) | Area     | Area % | Assay % | # | Peak name | ax/min (min) | Area    | Area % | Assay % |
|---|-----------|--------------|----------|--------|---------|---|-----------|--------------|---------|--------|---------|
| 0 |           | 19.984       | 39344.14 | 51.41  | 0.00    | 0 |           | 18.539       | 7085.97 | 97.03  | 0.00    |
| 1 |           | 29.205       | 37185.57 | 48.59  | 0.00    | 1 |           | 27.047       | 216.80  | 2.97   | 0.00    |

HPLC conditions for **3m** :  $t_R$  19.98 min (major **R**-iosmer), 29.20 min (**S**-isomer)  
(Chiralpak AD-H, hexane/*i*-PrOH, 92/8, 1.0 ml/min,  $\lambda = 254$  nm) for 93% ee (**R**).

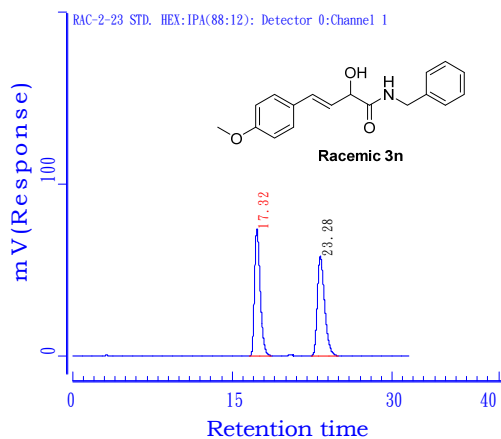

| # | Peak name | α/min (min) | Area    | Area % | Assay % |
|---|-----------|-------------|---------|--------|---------|
| 0 |           | 17.321      | 2758.72 | 49.86  | 0.00    |
| 1 |           | 23.284      | 2774.73 | 50.14  | 0.00    |

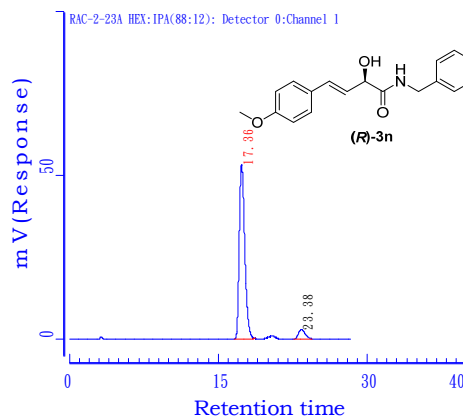

| # | Peak name | α/min (min) | Area    | Area % | Assay % |
|---|-----------|-------------|---------|--------|---------|
| 0 |           | 17.364      | 2061.16 | 93.52  | 0.00    |
| 1 |           | 23.378      | 142.73  | 6.48   | 0.00    |

HPLC conditions for **3n** :  $t_R$  18.32 min (major **R**-iosmer), 23.28 min (**S**-isomer) (Chiralpak AD-H, hexane/*i*-PrOH, 88/12, 1.0 ml/min,  $\lambda = 254$  nm) for 87% ee.

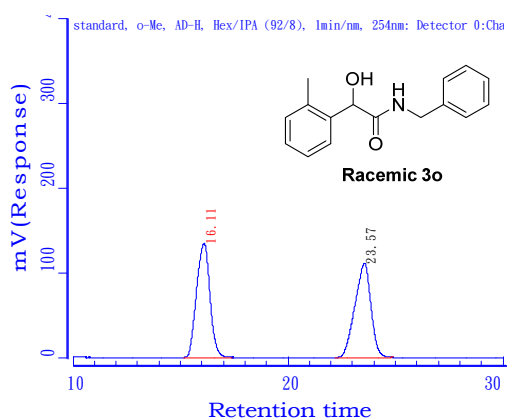

| # | Peak name | max/min (min) | Area    | Area % | Assay % |
|---|-----------|---------------|---------|--------|---------|
| 0 |           | 16.110        | 5815.39 | 50.37  | 0.00    |
| 1 |           | 23.570        | 5731.04 | 49.63  | 0.00    |

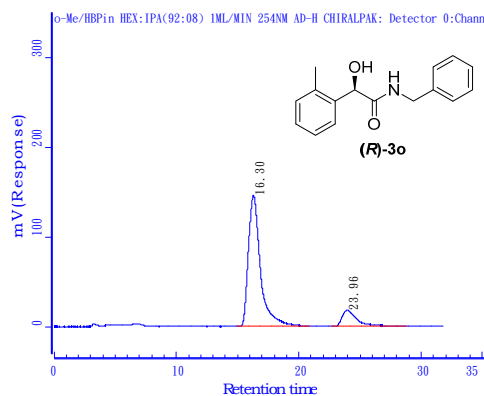

| # | Peak name | ax/min (min) | Area     | Area % | Assay % |
|---|-----------|--------------|----------|--------|---------|
| 0 |           | 16.298       | 10030.24 | 86.80  | 0.00    |
| 1 |           | 23.964       | 1525.81  | 13.20  | 0.00    |

HPLC conditions for **3o** :  $t_R$  16.11 min (major **R**-iosmer), 23.57 min (**S**-isomer) (Chiralpak AD-H, hexane/*i*-PrOH, 92/8, 1.0 ml/min,  $\lambda = 254$  nm) for 74% ee.

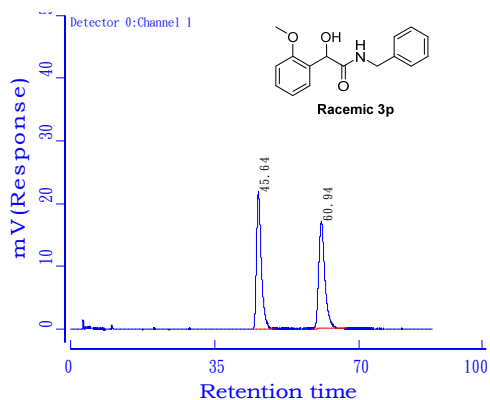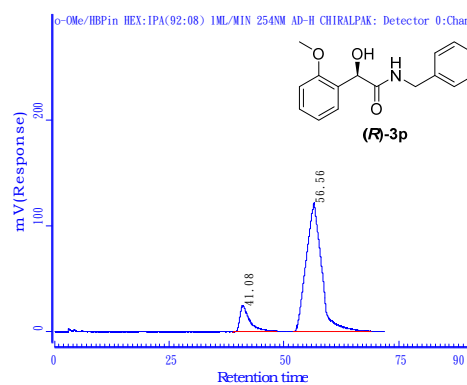

| # | Peak name | α/min (min) | Area    | Area % | Assay % |
|---|-----------|-------------|---------|--------|---------|
| 0 |           | 45.639      | 1758.72 | 50.01  | 0.00    |
| 1 |           | 60.939      | 1758.36 | 49.99  | 0.00    |

| # | Peak name | αx/min (min) | Area     | Area % | Assay % |
|---|-----------|--------------|----------|--------|---------|
| 0 |           | 41.079       | 3594.86  | 11.30  | 0.00    |
| 1 |           | 56.565       | 28206.65 | 88.70  | 0.00    |

HPLC conditions for **3p** :  $t_R$  16.11 min (**R**-iosmer), 23.57 min (major **S**-isomer) (Chiralpak AD-H, hexane/*i*-PrOH, 92/8, 1.0 ml/min,  $\lambda = 254$  nm) for 77% ee.

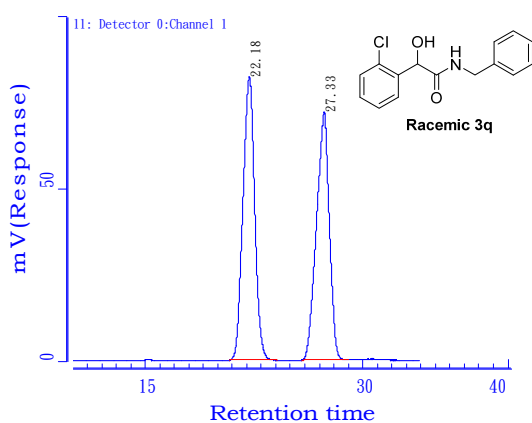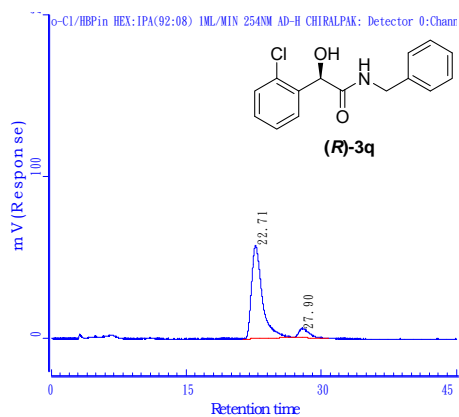

| # | Peak name | α/min (min) | Area    | Area % | Assay % |
|---|-----------|-------------|---------|--------|---------|
| 0 |           | 22.177      | 4579.48 | 50.87  | 0.00    |
| 1 |           | 27.333      | 4422.92 | 49.13  | 0.00    |

| # | Peak name | αx/min (min) | Area    | Area % | Assay % |
|---|-----------|--------------|---------|--------|---------|
| 0 |           | 22.714       | 4752.32 | 91.30  | 0.00    |
| 1 |           | 27.899       | 452.94  | 8.70   | 0.00    |

HPLC conditions for **3q** :  $t_R$  22.18 min (major **R**-iosmer), 27.33 min (**S**-isomer) (Chiralpak AD-H, hexane/*i*-PrOH, 92/8, 1.0 ml/min,  $\lambda = 254$  nm) for 83% ee.

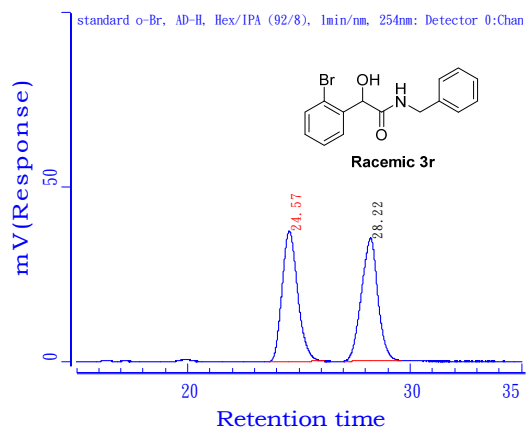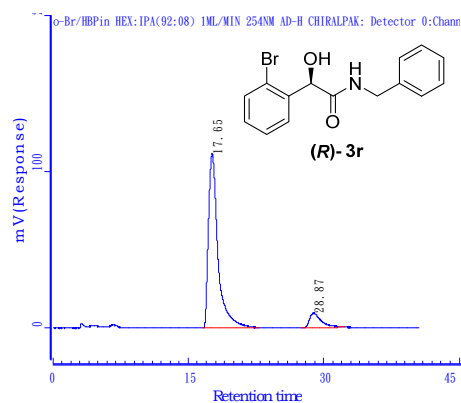

| # | Peak name | ax/min (min) | Area    | Area % | Assay % |
|---|-----------|--------------|---------|--------|---------|
| 0 |           | 24.568       | 1821.72 | 50.12  | 0.00    |
| 1 |           | 28.224       | 1813.33 | 49.88  | 0.00    |

| # | Peak name | ax/min (min) | Area    | Area % | Assay % |
|---|-----------|--------------|---------|--------|---------|
| 0 |           | 17.653       | 8145.64 | 90.50  | 0.00    |
| 1 |           | 28.871       | 855.09  | 9.50   | 0.00    |

HPLC conditions for **3r** :  $t_R$  24.57 min (major **R**-iosmer), 28.22 min (**S**-isomer) (Chiralpak AD-H, hexane/*i*-PrOH, 92/8, 1.0 ml/min,  $\lambda = 254$  nm) for 81% ee.

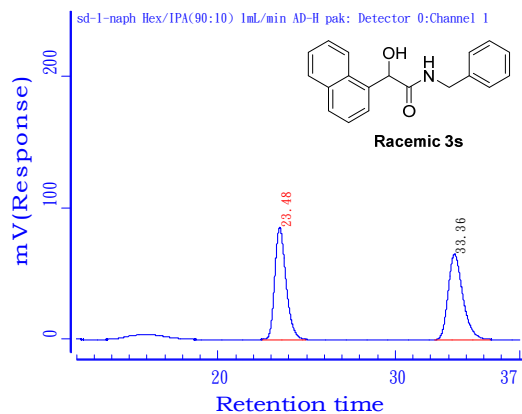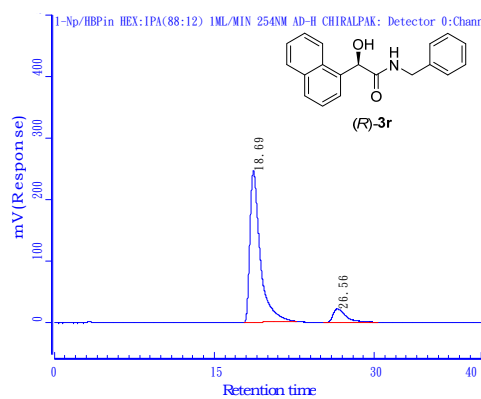

| # | Peak name | ax/min (min) | Area    | Area % | Assay % |
|---|-----------|--------------|---------|--------|---------|
| 0 |           | 23.483       | 3753.35 | 49.97  | 0.00    |
| 1 |           | 33.357       | 3757.27 | 50.03  | 0.00    |

| # | Peak name | ax/min (min) | Area     | Area % | Assay % |
|---|-----------|--------------|----------|--------|---------|
| 0 |           | 18.686       | 16666.70 | 89.57  | 0.00    |
| 1 |           | 26.557       | 1941.26  | 10.43  | 0.00    |

HPLC conditions for **3s** :  $t_R$  23.48 min (major **R**-isomer), 33.36 min (**S**-isomer) (Chiralpak AD-H, hexane/*i*-PrOH, 90/10, 1.0 mL/min,  $\lambda = 254$  nm) for 79% ee.

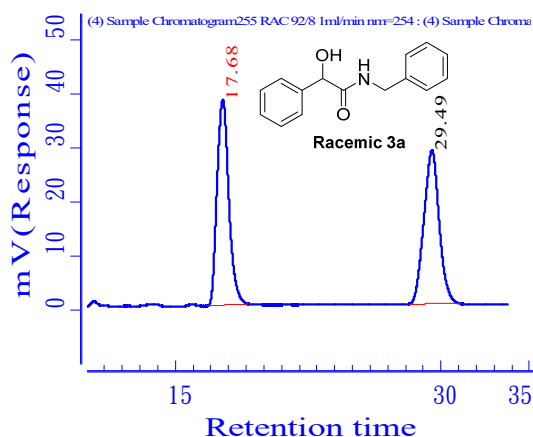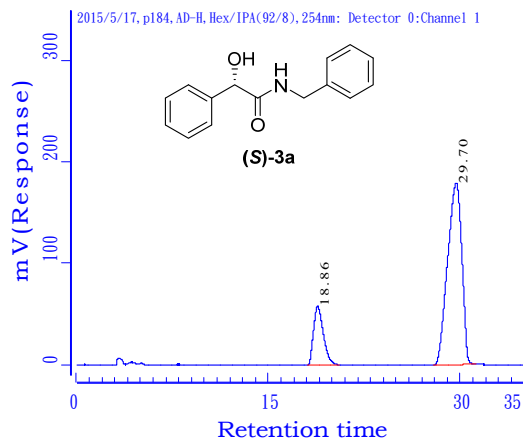

| # | Peak name | α/min (min) | Area    | Area % | Assay % | # | Peak name | x/min (min) | Area     | Area % | Assay % |
|---|-----------|-------------|---------|--------|---------|---|-----------|-------------|----------|--------|---------|
| 0 |           | 17.682      | 1761.21 | 50.72  | 0.00    | 0 |           | 18.859      | 3097.18  | 18.20  | 0.00    |
| 1 |           | 29.485      | 1711.11 | 49.28  | 0.00    | 1 |           | 29.701      | 13919.38 | 81.80  | 0.00    |

HPLC conditions for **3a** :  $t_R$  17.68 min (*R*-iosmer), 29.49 min (major *S*-isomer) (Chiralpak AD-H, hexane/*i*-PrOH, 92/8, 1.0 ml/min,  $\lambda = 254$  nm) for 64% ee.

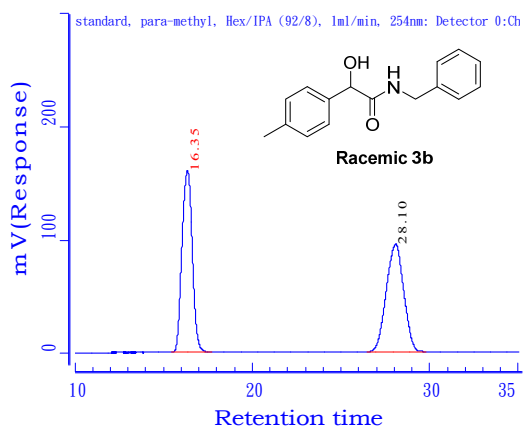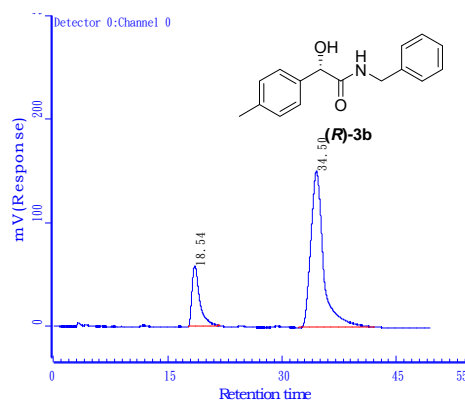

| # | Peak name | max/min (min) | Area    | Area % | Assay % | # | Peak name | ax/min (min) | Area     | Area % | Assay % |
|---|-----------|---------------|---------|--------|---------|---|-----------|--------------|----------|--------|---------|
| 0 |           | 16.354        | 6491.10 | 49.87  | 0.00    | 0 |           | 18.536       | 3997.59  | 18.70  | 0.00    |
| 1 |           | 28.096        | 6524.62 | 50.13  | 0.00    | 1 |           | 34.504       | 17377.08 | 81.30  | 0.00    |

HPLC conditions for **3b** :  $t_R$  16.35 min (*R*-iosmer), 28.10 min (major *S*-isomer) (Chiralpak AD-H, hexane/*i*-PrOH, 92/8, 1.0 ml/min,  $\lambda = 254$  nm) for 63% ee.

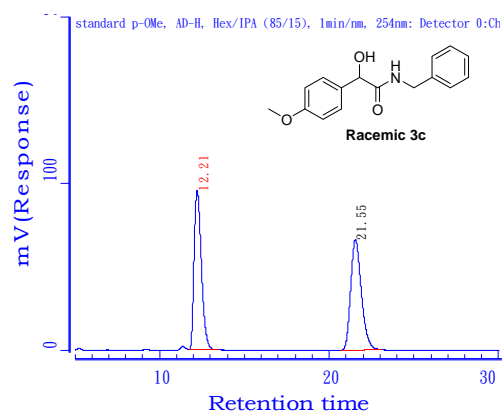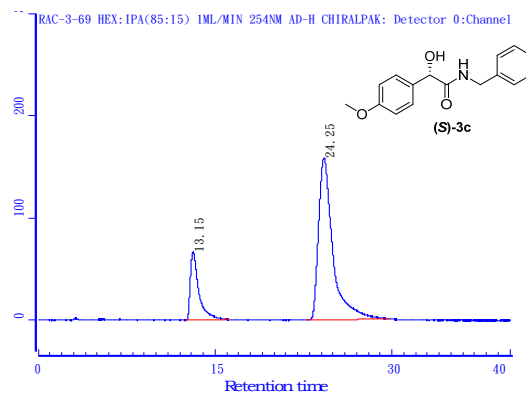

| # | Peak name | max/min (min) | Area    | Area % | Assay % |
|---|-----------|---------------|---------|--------|---------|
| 0 |           | 12.212        | 2869.52 | 49.68  | 0.00    |
| 1 |           | 21.554        | 2906.32 | 50.32  | 0.00    |

| Peak name | ax/min (min) | Area     | Area % | Assay % |
|-----------|--------------|----------|--------|---------|
|           | 13.148       | 3302.90  | 19.78  | 0.00    |
|           | 24.253       | 13398.16 | 80.22  | 0.00    |

HPLC conditions for **3c** :  $t_R$  12.21 min (*R*-iosmer), 21.55 min (major *S*-isomer) (Chiralpak AD-H, hexane/*i*-PrOH, 85/15, 1.0 ml/min,  $\lambda = 254$  nm) for 60% ee.

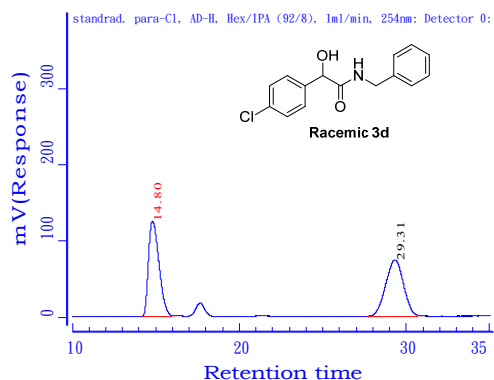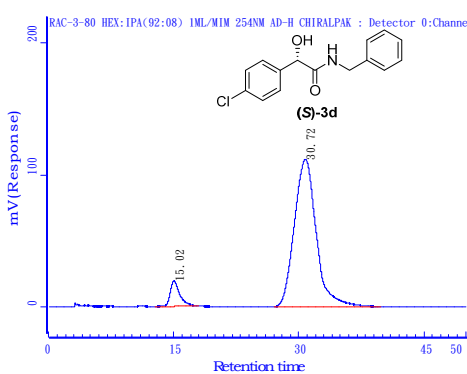

| # | Peak name | max/min (min) | Area    | Area % | Assay % |
|---|-----------|---------------|---------|--------|---------|
| 0 |           | 14.800        | 5462.06 | 49.93  | 0.00    |
| 1 |           | 29.312        | 5478.30 | 50.07  | 0.00    |

| # | Peak name | ax/min (min) | Area     | Area % | Assay % |
|---|-----------|--------------|----------|--------|---------|
| 0 |           | 15.023       | 1547.37  | 7.05   | 0.00    |
| 1 |           | 30.724       | 20394.67 | 92.95  | 0.00    |

HPLC conditions for **3d** :  $t_R$  14.30 min (*R*-iosmer), 29.31 min (major *S*-isomer) (Chiralpak AD-H, hexane/*i*-PrOH, 92/8, 1.0 ml/min,  $\lambda = 254$  nm) for 86% ee.

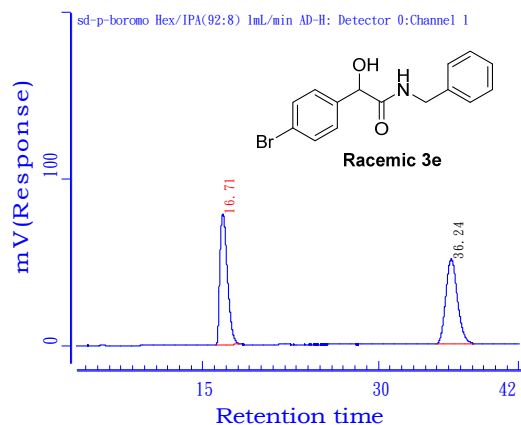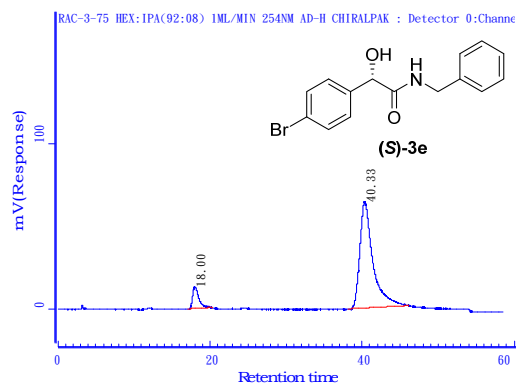

| # | Peak name | ax/min (min) | Area    | Area % | Assay % |
|---|-----------|--------------|---------|--------|---------|
| 0 |           | 16.712       | 3511.85 | 49.93  | 0.00    |
| 1 |           | 36.236       | 3522.01 | 50.07  | 0.00    |

  

| # | Peak name | ax/min (min) | Area    | Area % | Assay % |
|---|-----------|--------------|---------|--------|---------|
| 0 |           | 18.005       | 713.61  | 8.53   | 0.00    |
| 1 |           | 40.333       | 7648.40 | 91.47  | 0.00    |

HPLC conditions for **3e** :  $t_R$  16.71 min (*R*-iosmer), 36.24 min (major *S*-isomer) (Chiralpak AD-H, hexane/*i*-PrOH, 92/8, 1.0 ml/min,  $\lambda = 254$  nm) for 83% ee.

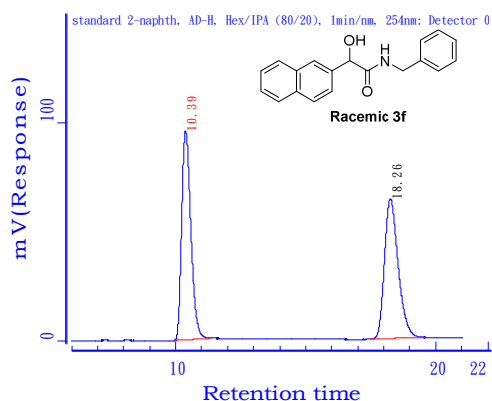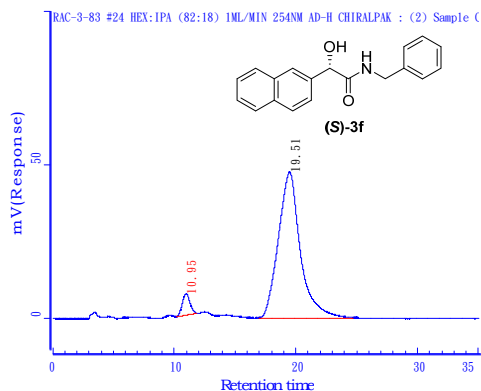

| # | Peak name | ax/min (min) | Area    | Area % | Assay % |
|---|-----------|--------------|---------|--------|---------|
| 0 |           | 10.388       | 2339.20 | 50.02  | 0.00    |
| 1 |           | 18.259       | 2337.73 | 49.98  | 0.00    |

  

| # | Peak name | ax/min (min) | Area    | Area % | Assay % |
|---|-----------|--------------|---------|--------|---------|
| 0 |           | 10.948       | 309.20  | 4.97   | 0.00    |
| 1 |           | 19.513       | 5914.63 | 95.03  | 0.00    |

HPLC conditions for **3f** :  $t_R$  10.39 min (*R*-iosmer), 18.26 min (major *S*-isomer) (Chiralpak AD-H, hexane/*i*-PrOH, 80/20, 1.0 ml/min,  $\lambda = 254$  nm) for 90% ee.



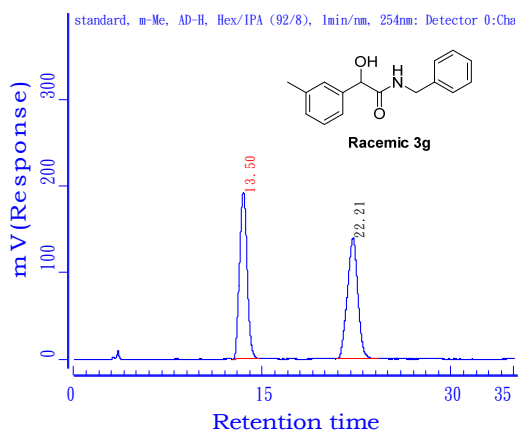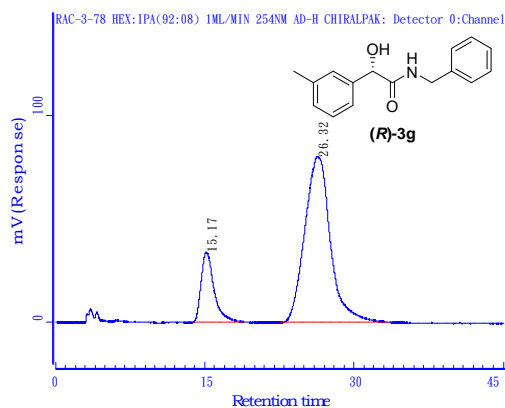

| # | Peak name | max/min (min) | Area    | Area % | Assay % |
|---|-----------|---------------|---------|--------|---------|
| 0 |           | 13.501        | 8072.94 | 49.88  | 0.00    |
| 1 |           | 22.210        | 8112.04 | 50.12  | 0.00    |

  

| # | Peak name | ax/min (min) | Area     | Area % | Assay % |
|---|-----------|--------------|----------|--------|---------|
| 0 |           | 15.174       | 3087.54  | 17.68  | 0.00    |
| 1 |           | 26.317       | 14375.21 | 82.32  | 0.00    |

HPLC conditions for **3g** :  $t_R$  13.50 min (**R**-iosmer), 22.21 min (major **S**-isomer) (Chiralpak AD-H, hexane/*i*-PrOH, 92/8, 1.0 ml/min,  $\lambda = 254$  nm) for 65% ee.

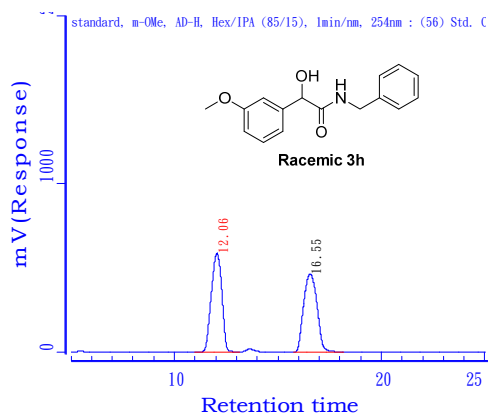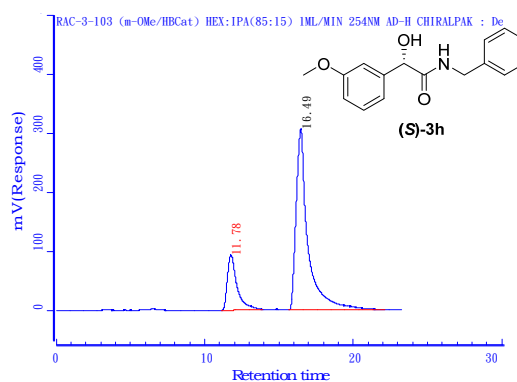

| # | Peak name | max/min (min) | Area     | Area % | Assay % |
|---|-----------|---------------|----------|--------|---------|
| 0 |           | 12.058        | 20649.21 | 49.89  | 0.00    |
| 1 |           | 16.553        | 20737.65 | 50.11  | 0.00    |

  

| # | Peak name | ax/min (min) | Area     | Area % | Assay % |
|---|-----------|--------------|----------|--------|---------|
| 0 |           | 11.783       | 4209.42  | 19.85  | 0.00    |
| 1 |           | 16.487       | 16999.30 | 80.15  | 0.00    |

HPLC conditions for **3h** :  $t_R$  12.06 min (**R**-iosmer), 16.55 min (major **S**-isomer) (Chiralpak AD-H, hexane/*i*-PrOH, 85/15, 1.0 ml/min,  $\lambda = 254$  nm) for 60% ee (**S**).

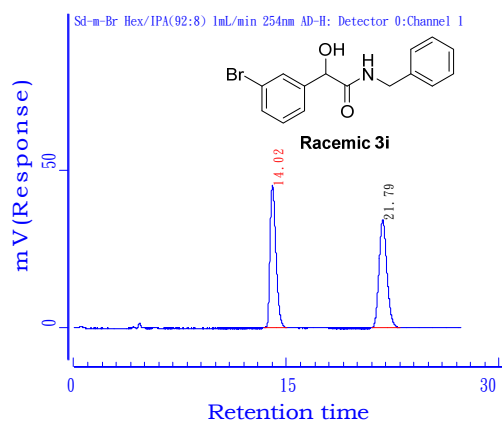

| # | Peak name | ax/min (min) | Area    | Area % | Assay % |
|---|-----------|--------------|---------|--------|---------|
| 0 |           | 14.022       | 1308.88 | 49.52  | 0.00    |
| 1 |           | 21.789       | 1334.19 | 50.48  | 0.00    |

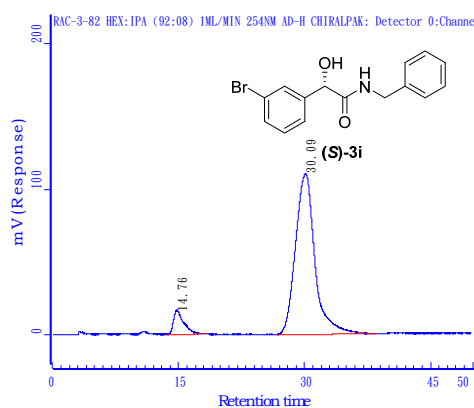

| # | Peak name | ax/min (min) | Area     | Area % | Assay % |
|---|-----------|--------------|----------|--------|---------|
| 0 |           | 14.759       | 1422.15  | 7.40   | 0.00    |
| 1 |           | 30.090       | 17803.85 | 92.60  | 0.00    |

HPLC conditions for **3i** :  $t_R$  14.02 min (**R**-iosmer), 21.79 min (major **S**-isomer) (Chiralpak AD-H, hexane/*i*-PrOH, 92/8, 1.0 ml/min,  $\lambda = 254$  nm) for 85% ee (**R**).

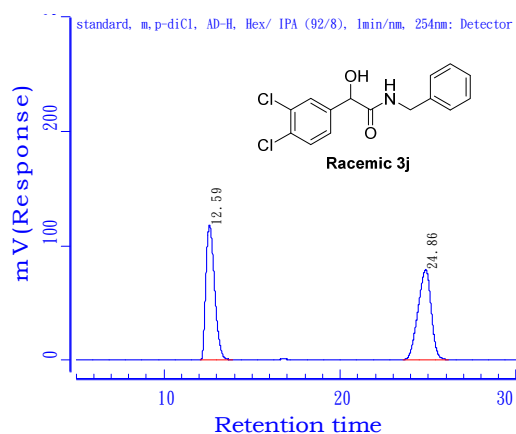

| # | Peak name | max/min (min) | Area    | Area % | Assay % |
|---|-----------|---------------|---------|--------|---------|
| 0 |           | 12.586        | 4074.42 | 49.80  | 0.00    |
| 1 |           | 24.858        | 4106.63 | 50.20  | 0.00    |

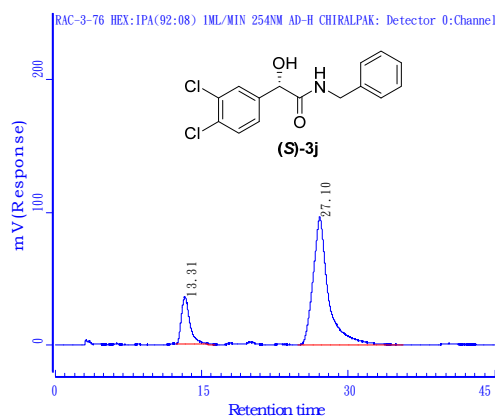

| # | Peak name | ax/min (min) | Area     | Area % | Assay % |
|---|-----------|--------------|----------|--------|---------|
| 0 |           | 13.308       | 2156.12  | 17.05  | 0.00    |
| 1 |           | 27.101       | 10488.94 | 82.95  | 0.00    |

HPLC conditions for **3j** :  $t_R$  12.59 min (**R**-iosmer), 24.86 min (major **S**-isomer) (Chiralpak AD-H, hexane/*i*-PrOH, 92/8, 1.0 ml/min,  $\lambda = 254$  nm) for 66% ee.

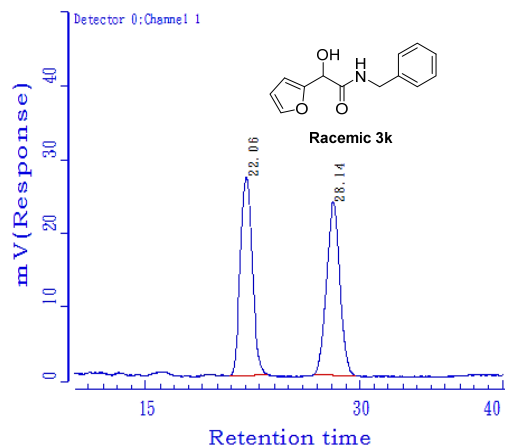

| # | Peak name | rt/min (min) | Area    | Area % | Assay % |
|---|-----------|--------------|---------|--------|---------|
| 0 |           | 22.065       | 1560.10 | 50.33  | 0.00    |
| 1 |           | 28.144       | 1539.55 | 49.67  | 0.00    |

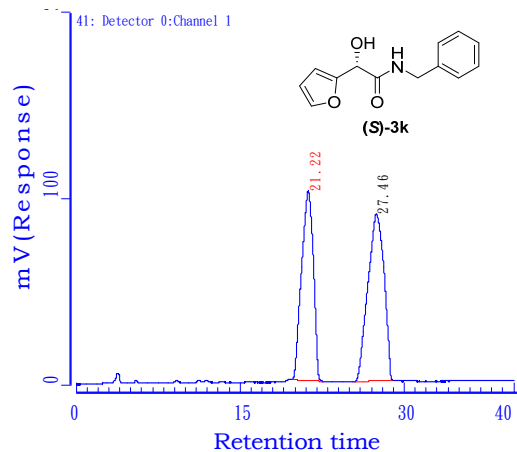

| # | Peak name | rt/min (min) | Area    | Area % | Assay % |
|---|-----------|--------------|---------|--------|---------|
| 0 |           | 21.221       | 7651.67 | 45.28  | 0.00    |
| 1 |           | 27.455       | 9247.44 | 54.72  | 0.00    |

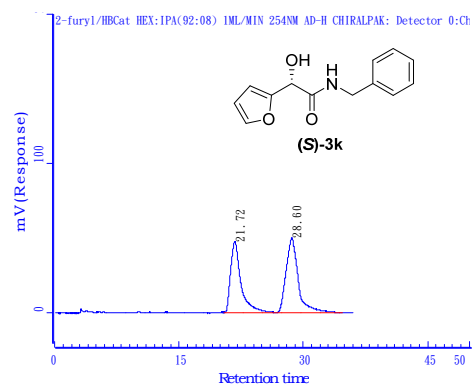

| # | Peak name | rt/min (min) | Area    | Area % | Assay % |
|---|-----------|--------------|---------|--------|---------|
| 0 |           | 21.723       | 4076.55 | 44.75  | 0.00    |
| 1 |           | 28.603       | 5032.30 | 55.25  | 0.00    |

HPLC conditions for **3k** :  $t_R$  22.06 min (*R*-iosmer), 28.14 min (major *S*-isomer) (Chiralpak AD-H, hexane/*i*-PrOH, 92/8, 1.0 ml/min,  $\lambda = 254$  nm) for 10% ee (*S*) and 11% ee (*S*).

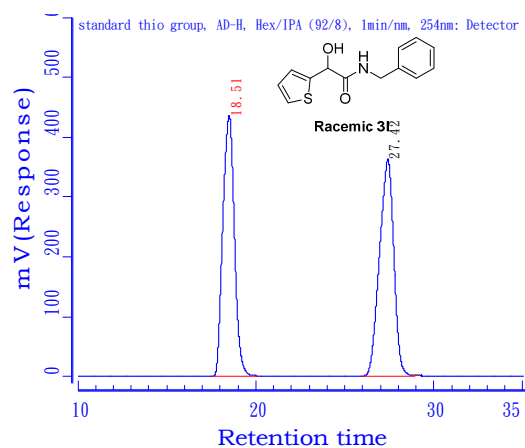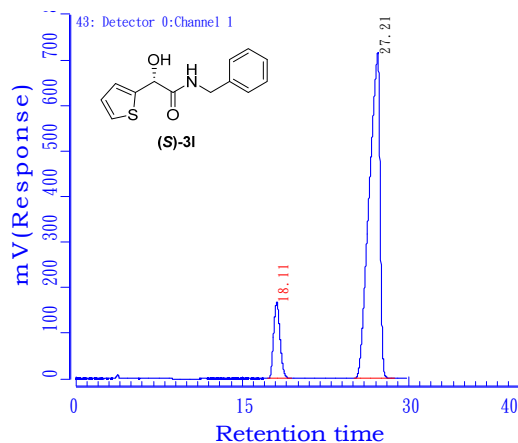

| # | Peak name | max/min (min) | Area     | Area % | Assay % | # | Peak name | max/min (min) | Area     | Area % | Assay % |
|---|-----------|---------------|----------|--------|---------|---|-----------|---------------|----------|--------|---------|
| 0 |           | 18.508        | 19638.88 | 49.29  | 0.00    | 0 |           | 18.114        | 6808.47  | 12.29  | 0.00    |
| 1 |           | 27.419        | 20202.77 | 50.71  | 0.00    | 1 |           | 27.208        | 48576.18 | 87.71  | 0.00    |

HPLC conditions for **3n** :  $t_R$  18.51 min (**R**-iosmer), 27.42 min (major **S**-isomer)  
(Chiralpak AD-H, hexane/*i*-PrOH, 92/8, 1.0 ml/min,  $\lambda = 254$  nm) for 75% ee.

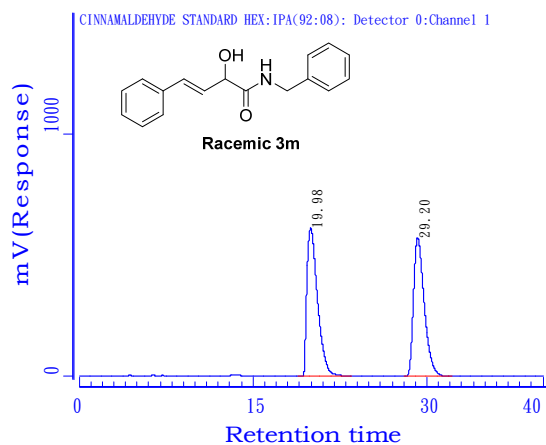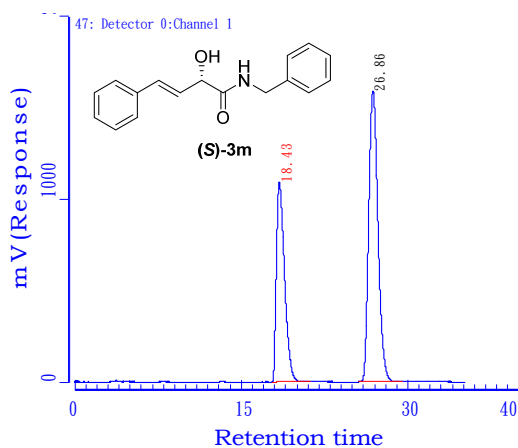

| # | Peak name | max/min (min) | Area     | Area % | Assay % | # | Peak name | max/min (min) | Area     | Area % | Assay % |
|---|-----------|---------------|----------|--------|---------|---|-----------|---------------|----------|--------|---------|
| 0 |           | 19.984        | 39344.14 | 51.41  | 0.00    | 0 |           | 18.433        | 55928.74 | 37.74  | 0.00    |
| 1 |           | 29.205        | 37185.57 | 48.59  | 0.00    | 1 |           | 26.856        | 92266.18 | 62.26  | 0.00    |

HPLC conditions for **3m** :  $t_R$  19.98 min (**R**-iosmer), 29.20 min (major **S**-isomer)  
(Chiralpak AD-H, hexane/*i*-PrOH, 92/8, 1.0 ml/min,  $\lambda = 254$  nm) for 25% ee.

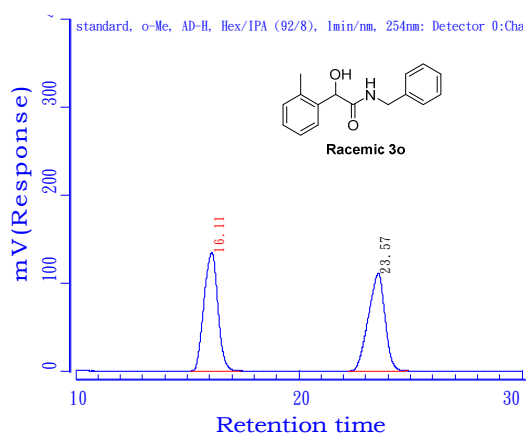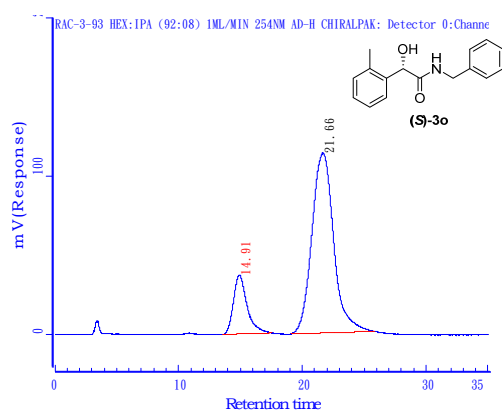

| # | Peak name | max/min (min) | Area    | Area % | Assay % |
|---|-----------|---------------|---------|--------|---------|
| 0 |           | 16.110        | 5815.39 | 50.37  | 0.00    |
| 1 |           | 23.570        | 5731.04 | 49.63  | 0.00    |

  

| # | Peak name | ax/min (min) | Area     | Area % | Assay % |
|---|-----------|--------------|----------|--------|---------|
| 0 |           | 14.906       | 2833.79  | 16.94  | 0.00    |
| 1 |           | 21.664       | 13892.88 | 83.06  | 0.00    |

HPLC conditions for **3o** :  $t_R$  16.11 min (*R*-iosmer), 23.57 min (major *S*-isomer)  
 (Chiralpak AD-H, hexane/*i*-PrOH, 92/8, 1.0 ml/min,  $\lambda = 254$  nm) for 66% ee.

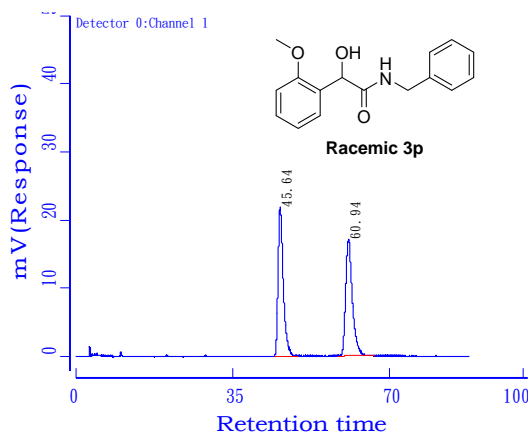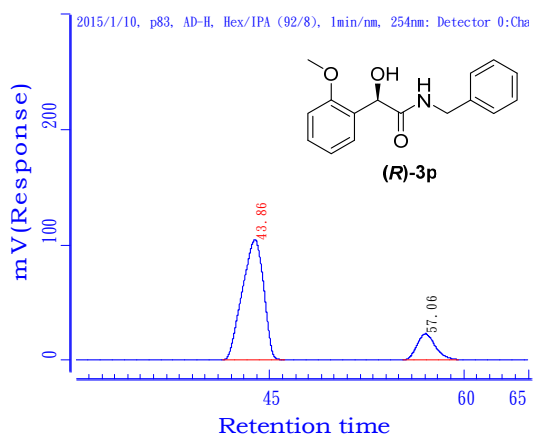

| # | Peak name | α/min (min) | Area    | Area % | Assay % | # | Peak name | max/min (min) | Area     | Area % | Assay % |
|---|-----------|-------------|---------|--------|---------|---|-----------|---------------|----------|--------|---------|
| 0 |           | 45.639      | 1758.72 | 50.01  | 0.00    | 0 |           | 43.862        | 12017.23 | 84.35  | 0.00    |
| 1 |           | 60.939      | 1758.36 | 49.99  | 0.00    | 1 |           | 57.057        | 2229.99  | 15.65  | 0.00    |

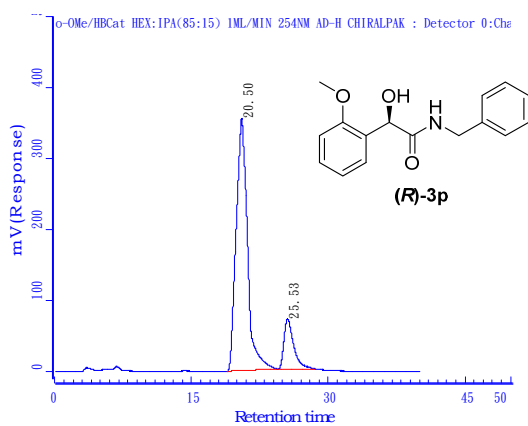

| # | Peak name | ax/min (min) | Area     | Area % | Assay % |
|---|-----------|--------------|----------|--------|---------|
| 0 |           | 20.503       | 30523.28 | 85.43  | 0.00    |
| 1 |           | 25.534       | 5206.17  | 14.57  | 0.00    |

HPLC conditions for **3p** :  $t_R$  43.86 min (major **R**-iosmer), 57.06 min (**S**-isomer) (Chiralpak AD-H, hexane/*i*-PrOH, 92/8, 1.0 ml/min,  $\lambda = 254$  nm) for 69% ee (**R**) and 71% ee (**R**).

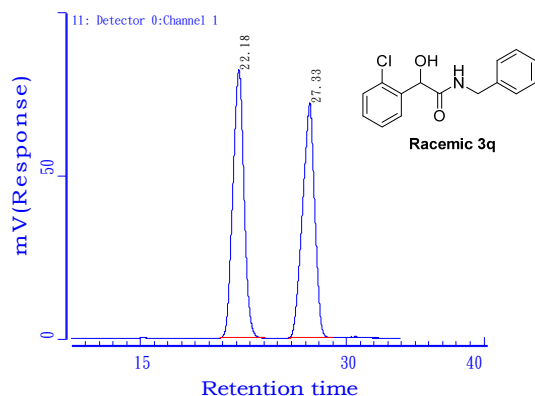

| # | Peak name | ax/min (min) | Area    | Area % | Assay % |
|---|-----------|--------------|---------|--------|---------|
| 0 |           | 22.177       | 4579.48 | 50.87  | 0.00    |
| 1 |           | 27.333       | 4422.92 | 49.13  | 0.00    |

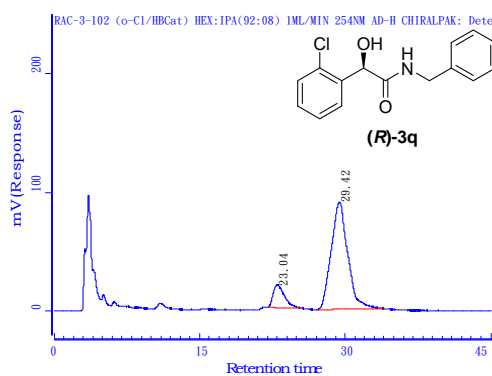

| # | Peak name | ax/min (min) | Area     | Area % | Assay % |
|---|-----------|--------------|----------|--------|---------|
| 0 |           | 23.044       | 1568.23  | 12.76  | 0.00    |
| 1 |           | 29.423       | 10721.67 | 87.24  | 0.00    |

HPLC conditions for **3q** :  $t_R$  22.18 min (**R**-iosmer), 27.33 min (major **S**-isomer) (Chiralpak AD-H, hexane/*i*-PrOH, 92/8, 1.0 ml/min,  $\lambda = 254$  nm) for 75% ee.

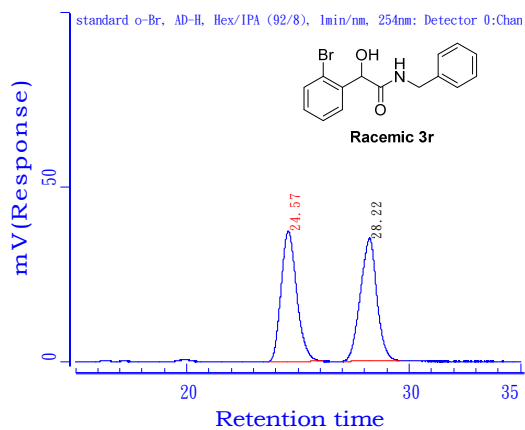

| # | Peak name | max/min (min) | Area    | Area % | Assay % |
|---|-----------|---------------|---------|--------|---------|
| 0 |           | 24.568        | 1821.72 | 50.12  | 0.00    |
| 1 |           | 28.224        | 1813.33 | 49.88  | 0.00    |

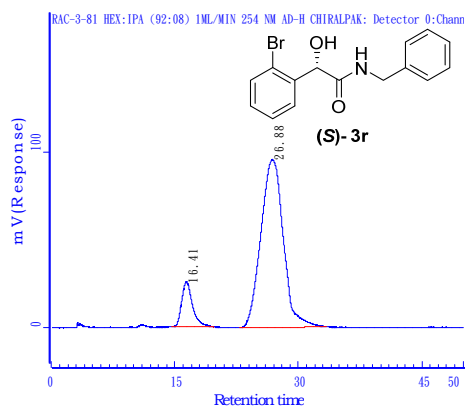

| # | Peak name | ax/min (min) | Area     | Area % | Assay % |
|---|-----------|--------------|----------|--------|---------|
| 0 |           | 16.407       | 2336.90  | 11.42  | 0.00    |
| 1 |           | 26.876       | 18130.53 | 88.58  | 0.00    |

HPLC conditions for **3r** :  $t_R$  24.57 min (**R**-iosmer), 28.22 min (major **S**-isomer) (Chiralpak AD-H, hexane/*i*-PrOH, 92/8, 1.0 ml/min,  $\lambda = 254$  nm) for 77% ee.

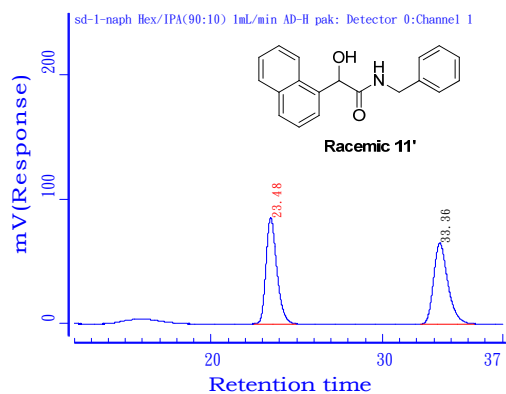

| # | Peak name | rt/min (min) | Area    | Area % | Assay % |
|---|-----------|--------------|---------|--------|---------|
| 0 |           | 23.483       | 3753.35 | 49.97  | 0.00    |
| 1 |           | 33.357       | 3757.27 | 50.03  | 0.00    |

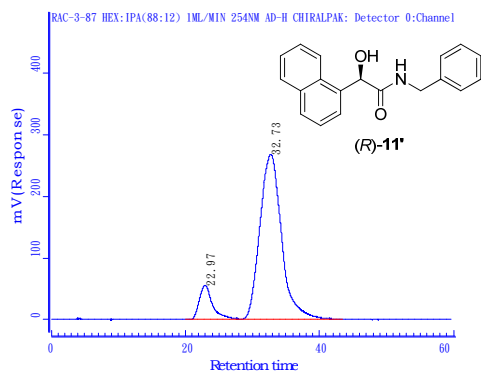

| # | Peak name | rt/min (min) | Area     | Area % | Assay % |
|---|-----------|--------------|----------|--------|---------|
| 0 |           | 22.971       | 7474.71  | 11.09  | 0.00    |
| 1 |           | 32.734       | 59912.84 | 88.91  | 0.00    |

HPLC conditions for **11'**:  $t_R$  23.48 min (*R*-isomer), 33.36 min (major *S*-isomer) (Chiralpak AD-H, hexane/*i*-PrOH, 90/10, 1.0 mL/min,  $\lambda = 254$  nm) for 78% ee.



Table S1

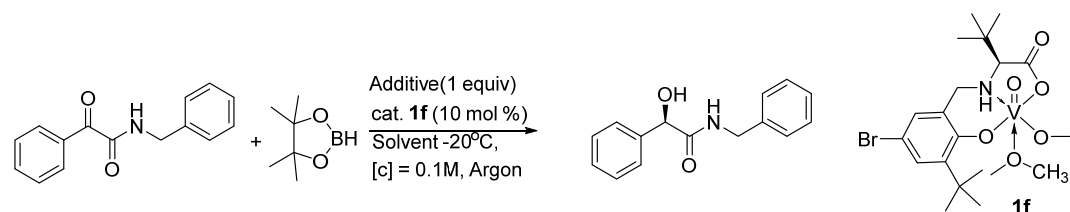

| Entry | Reducing Agent | Additive                            | Time (h) | Yield (%) | Ee (%)          |
|-------|----------------|-------------------------------------|----------|-----------|-----------------|
| 1     | PinB-H         | —                                   | 96       | 65        | 88 ( <i>R</i> ) |
| 2     | PinB-H         | MeOH                                | 96       | 40        | 99 ( <i>R</i> ) |
| 3     | PinB-H         | CCl <sub>3</sub> CH <sub>2</sub> OH | 96       | 47        | 91 ( <i>R</i> ) |
| 4     | PinB-H         | CF <sub>3</sub> CH <sub>2</sub> OH  | 96       | 22        | 96 ( <i>R</i> ) |
| 5     | CatB-H         | —                                   | 14       | 99        | 64 ( <i>S</i> ) |
| 6     | CatB-H         | MeOH                                | 14       | 92        | 47 ( <i>S</i> ) |
| 7     | CatB-H         | CCl <sub>3</sub> CH <sub>2</sub> OH | 14       | 86        | 58 ( <i>S</i> ) |
| 8     | CatB-H         | CF <sub>3</sub> CH <sub>2</sub> OH  | 14       | 84        | 62 ( <i>S</i> ) |

Entry 2 Table S1

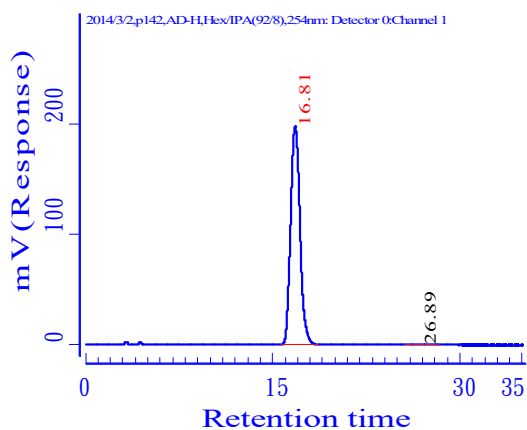

| # | Peak name | x/min (min) | Area     | Area % | Assay % |
|---|-----------|-------------|----------|--------|---------|
| 0 |           | 16.805      | 10363.80 | 99.87  | 0.00    |
| 1 |           | 26.893      | 13.15    | 0.13   | 0.00    |

Entry 3 Table S1

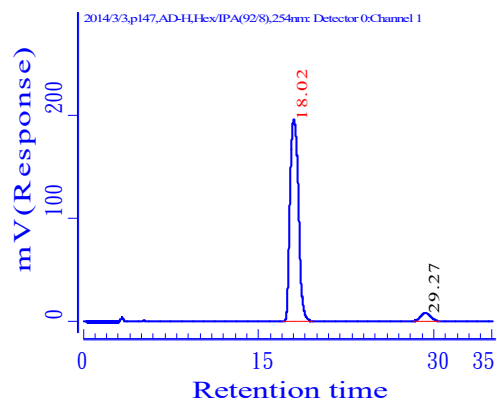

| # | Peak name | x/min (min) | Area    | Area % | Assay % |
|---|-----------|-------------|---------|--------|---------|
| 0 |           | 18.025      | 9871.17 | 95.53  | 0.00    |
| 1 |           | 29.275      | 461.69  | 4.47   | 0.00    |

Entry 4 Table S1

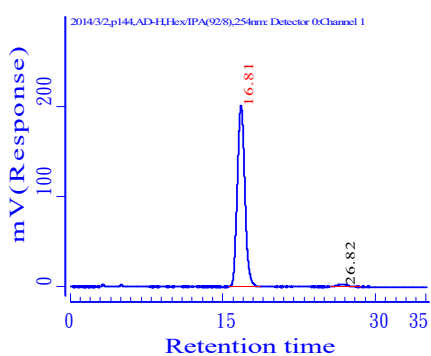

| # | Peak name | x/min (mim) | Area     | Area % | Assay % |
|---|-----------|-------------|----------|--------|---------|
| 0 |           | 16.809      | 10396.77 | 98.46  | 0.00    |
| 1 |           | 26.821      | 162.78   | 1.54   | 0.00    |

Entry 6 Table S1

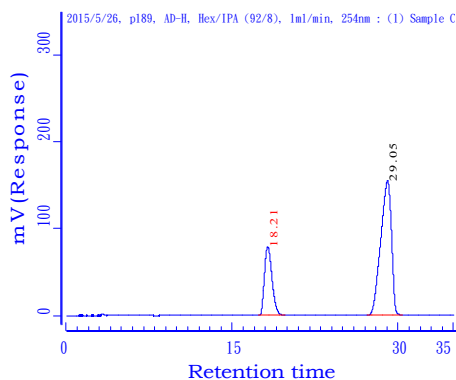

| # | Peak name | max/min (mim) | 面积       | Area % | Assay % |
|---|-----------|---------------|----------|--------|---------|
| 0 |           | 18.208        | 3746.65  | 26.24  | 0.00    |
| 1 |           | 29.045        | 10529.06 | 73.76  | 0.00    |

Entry 7 Table S1

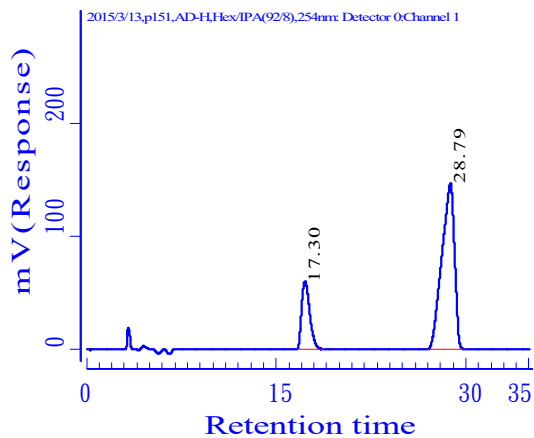

| # | Peak name | x/min (mim) | Area     | Area % | Assay % |
|---|-----------|-------------|----------|--------|---------|
| 0 |           | 17.300      | 2711.52  | 21.06  | 0.00    |
| 1 |           | 28.789      | 10163.16 | 78.94  | 0.00    |

Entry 8 Table S1

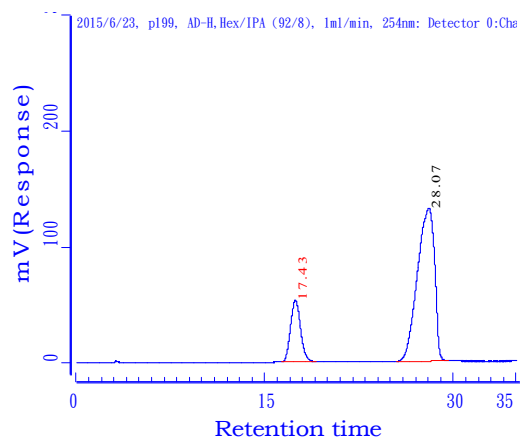

| # | Peak name | max/min (mim) | 面积       | Area % | Assay % |
|---|-----------|---------------|----------|--------|---------|
| 0 |           | 17.429        | 2950.49  | 19.02  | 0.00    |
| 1 |           | 28.065        | 12558.30 | 80.98  | 0.00    |

Table S2

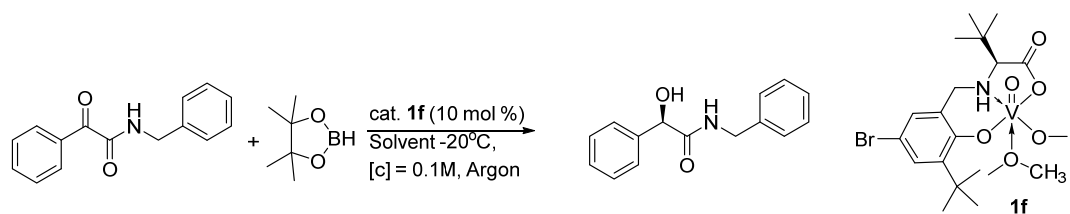

| entry     | Solvent            | Time(h)  | Yield(%) | ee%             |
|-----------|--------------------|----------|----------|-----------------|
| 1 (final) | toluene            | 24+24+48 | 65       | 88 ( <i>R</i> ) |
| 2         | MeOH               | 24+24+48 | 35       | 52 ( <i>R</i> ) |
| 3         | <i>i</i> -PrOH     | 24+24+48 | 43       | 56 ( <i>R</i> ) |
| 4         | 1,4-dioxane        | 24+24+48 | 21       | 36 ( <i>R</i> ) |
| 5         | CH <sub>3</sub> CN | 24+24+48 | 28       | 38 ( <i>R</i> ) |
| 6         | DMSO (r.t.)        | 24+24+48 | 52       | 12 ( <i>R</i> ) |
| 7         | DMF                | 24+24+48 | 19       | 24 ( <i>R</i> ) |

Entry 2 Table S2

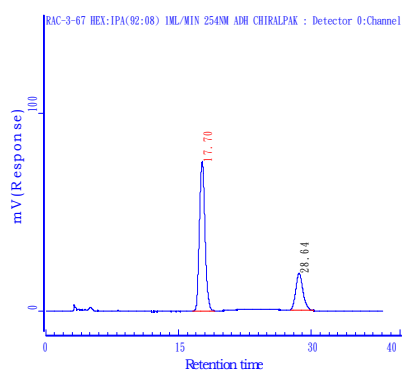

| # | Peak name | α/min (min) | Area    | Area % | Assay % |
|---|-----------|-------------|---------|--------|---------|
| 0 |           | 17.696      | 3321.98 | 75.88  | 0.00    |
| 1 |           | 28.641      | 1055.82 | 24.12  | 0.00    |

Entry 3 Table S2

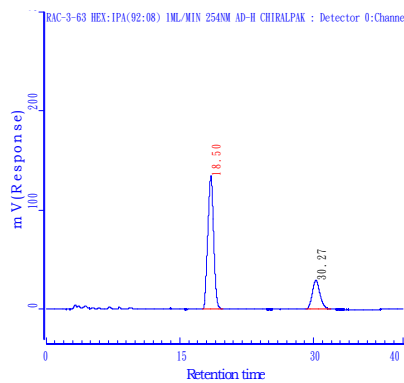

| # | Peak name | α/min (min) | Area    | Area % | Assay % |
|---|-----------|-------------|---------|--------|---------|
| 0 |           | 18.502      | 6143.29 | 78.02  | 0.00    |
| 1 |           | 30.272      | 1730.47 | 21.98  | 0.00    |

### Entry 4 Table S2

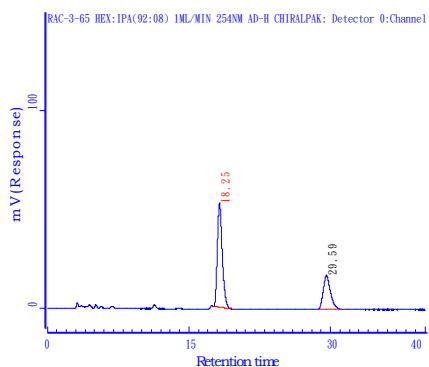

| # | Peak name | $\alpha$ /min (min) | Area    | Area % | Assay % |
|---|-----------|---------------------|---------|--------|---------|
| 0 |           | 18.252              | 1895.46 | 67.85  | 0.00    |
| 1 |           | 29.587              | 898.09  | 32.15  | 0.00    |

### Entry 5 Table S2

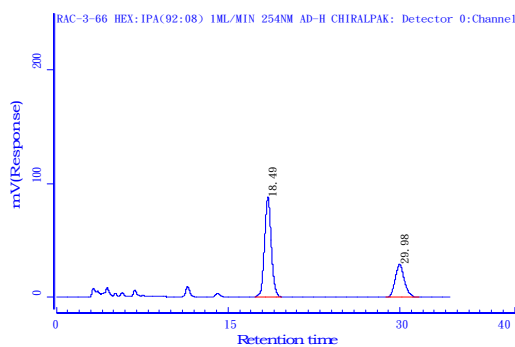

| # | Peak name | $\alpha$ /min (min) | Area    | Area % | Assay % |
|---|-----------|---------------------|---------|--------|---------|
| 0 |           | 18.489              | 3596.96 | 68.99  | 0.00    |
| 1 |           | 29.983              | 1616.70 | 31.01  | 0.00    |

### Entry 6 Table S2

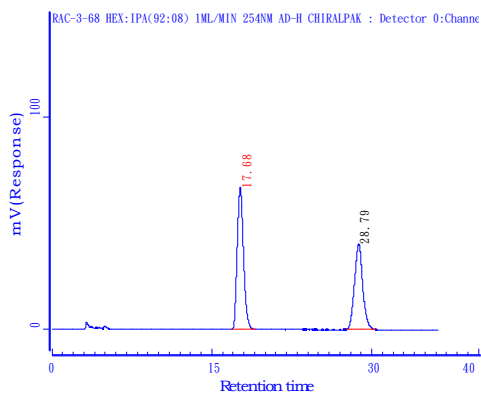

| # | Peak name | $\alpha$ /min (min) | Area    | Area % | Assay % |
|---|-----------|---------------------|---------|--------|---------|
| 0 |           | 17.683              | 2750.27 | 55.82  | 0.00    |
| 1 |           | 28.792              | 2176.45 | 44.18  | 0.00    |

### Entry 7 Table S2

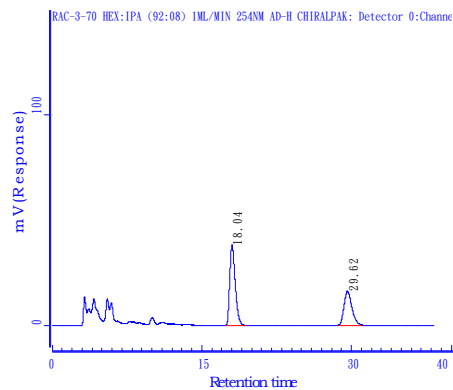

| # | Peak name | $\alpha$ /min (min) | Area    | Area % | Assay % |
|---|-----------|---------------------|---------|--------|---------|
| 0 |           | 18.044              | 1441.29 | 62.20  | 0.00    |
| 1 |           | 29.617              | 876.03  | 37.80  | 0.00    |

Table S3

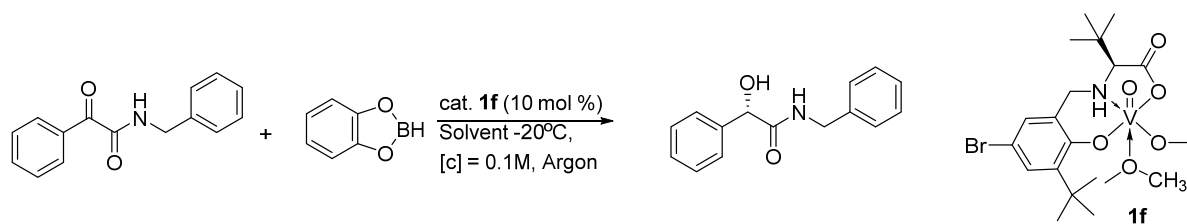

| entry     | Solvent                         | Time(h) | Yield(%) | ee%    |
|-----------|---------------------------------|---------|----------|--------|
| 1 (final) | toluene                         | 12      | 99       | 64 (S) |
| 2         | CH <sub>2</sub> Cl <sub>2</sub> | 12      | 97       | 2 (R)  |
| 3         | PhCl                            | 14      | 95       | 57 (S) |
| 4         | THF                             | 12      | 98       | 35 (S) |
| 5         | <i>t</i> -BuOMe                 | 15      | 87       | 4 (R)  |

Entry 2 Table S3

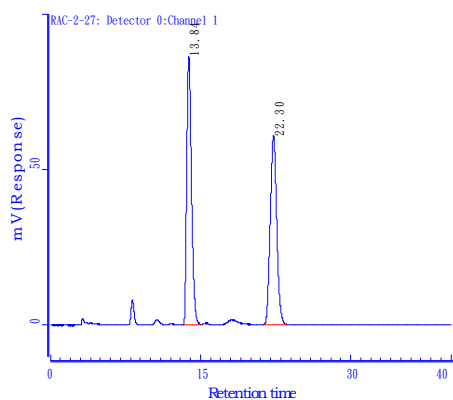

| # | Peak name | α/min (min) | Area    | Area % | Assay % |
|---|-----------|-------------|---------|--------|---------|
| 0 |           | 13.839      | 2849.17 | 51.18  | 0.00    |
| 1 |           | 22.305      | 2717.27 | 48.82  | 0.00    |

Entry 3 Table S3

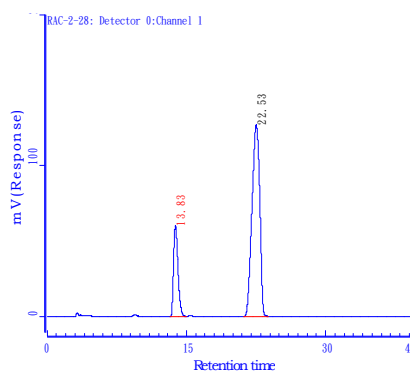

| # | Peak name | α/min (min) | Area    | Area % | Assay % |
|---|-----------|-------------|---------|--------|---------|
| 0 |           | 13.834      | 2003.39 | 21.34  | 0.00    |
| 1 |           | 22.534      | 7384.36 | 78.66  | 0.00    |

Entry 4 Table S3

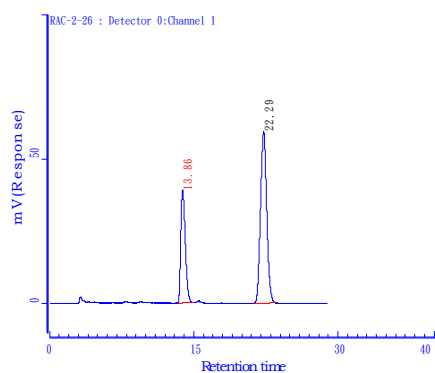

| # | Peak name | ax/min (min) | Area    | Area % | Assay % |
|---|-----------|--------------|---------|--------|---------|
| 0 |           | 13.860       | 1277.85 | 32.42  | 0.00    |
| 1 |           | 22.289       | 2663.32 | 67.58  | 0.00    |

Entry 5 Table S3

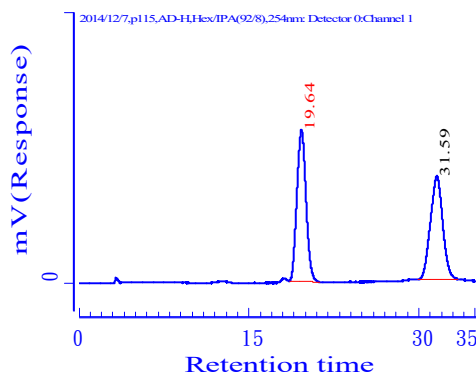

| # | Peak name | ax/min (min) | Area    | Area % | Assay % |
|---|-----------|--------------|---------|--------|---------|
| 0 |           | 19.642       | 3133.66 | 52.16  | 0.00    |
| 1 |           | 31.586       | 2873.65 | 47.84  | 0.00    |

Table S4

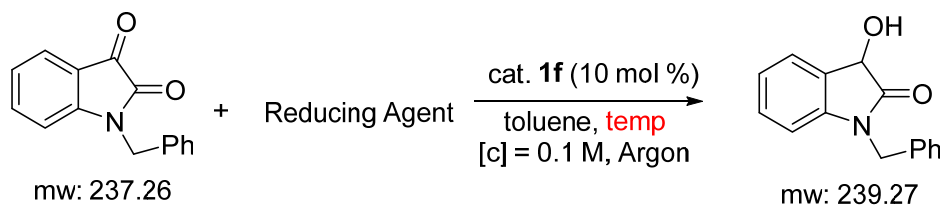

| reducing agent | temperature, °C | Yield, % | ee, %   |
|----------------|-----------------|----------|---------|
| HBPIn          | -20/-40         | 99/0     | 0/---   |
| HBCat          | -20/-40         | 92/28    | 2/8 (S) |

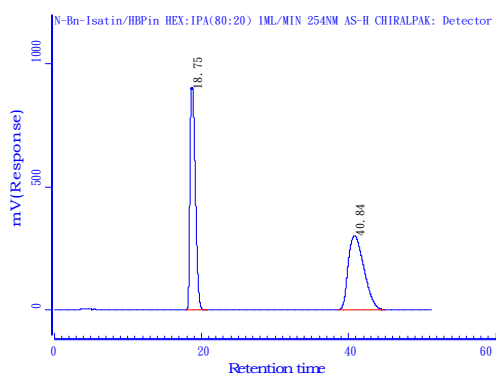

| # | Peak name | ax/min (min) | Area     | Area % | Assay % |
|---|-----------|--------------|----------|--------|---------|
| 0 |           | 18.753       | 45594.00 | 50.36  | 0.00    |
| 1 |           | 40.842       | 44942.66 | 49.64  | 0.00    |

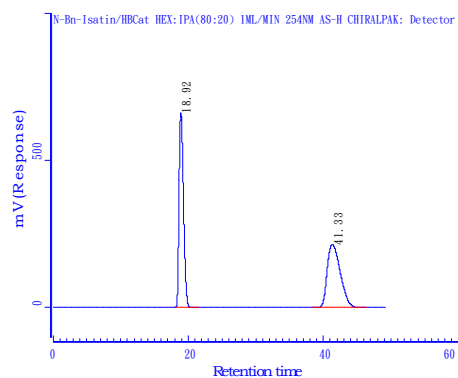

| # | Peak name | ax/min (min) | Area     | Area % | Assay % |
|---|-----------|--------------|----------|--------|---------|
| 0 |           | 18.917       | 30101.72 | 50.96  | 0.00    |
| 1 |           | 41.334       | 28965.59 | 49.04  | 0.00    |

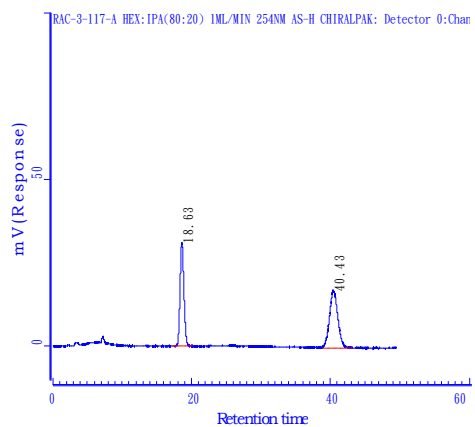

| # | Peak name | ax/min (min) | Area    | Area % | Assay % |
|---|-----------|--------------|---------|--------|---------|
| 0 |           | 18.625       | 1223.93 | 46.08  | 0.00    |
| 1 |           | 40.425       | 1432.16 | 53.92  | 0.00    |

# 7.<sup>1</sup>H and <sup>13</sup>C NMR spectra

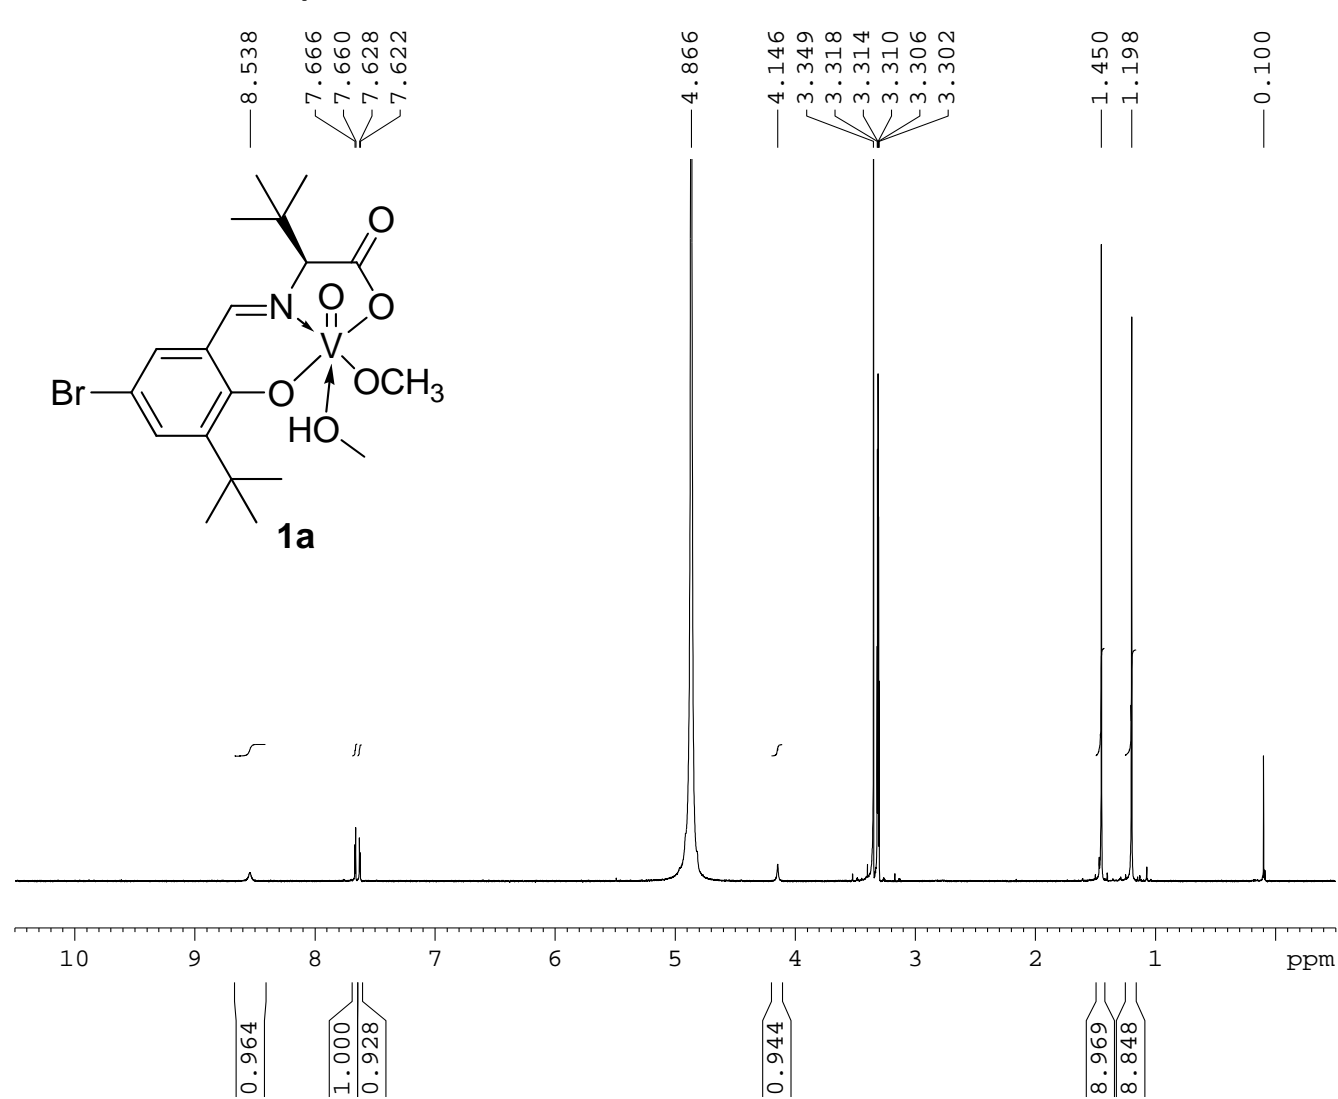

```

NAME          other
EXPNO         31
PROCNO        1
Date_         20120829
Time          16.01
INSTRUM       spect
PROBHD        5 mm DUL 13C-1
PULPROG       zg30
TD            32768
SOLVENT       MeOD
NS            8
DS            0
SWH           6410.256 Hz
FIDRES        0.195625 Hz
AQ            2.5559540 sec
RG            4
DW            78.000 usec
DE            6.00 usec
TE            300.0 K
D1            2.00000000 sec
TD0           1
    
```

```

===== CHANNEL f1 =====
NUC1          1H
P1            10.00 usec
PL1           -2.40 dB
SFO1          400.1528010 MHz
SI            16384
SF            400.1500067 MHz
WDW           EM
SSB           0
LB            0.00 Hz
GB            0
PC            1.00
    
```



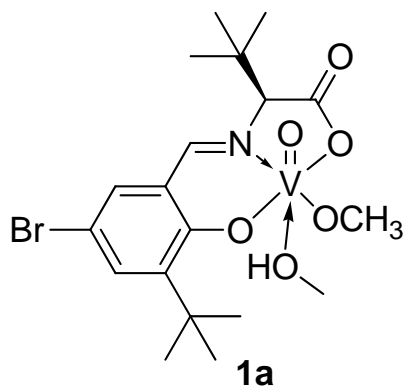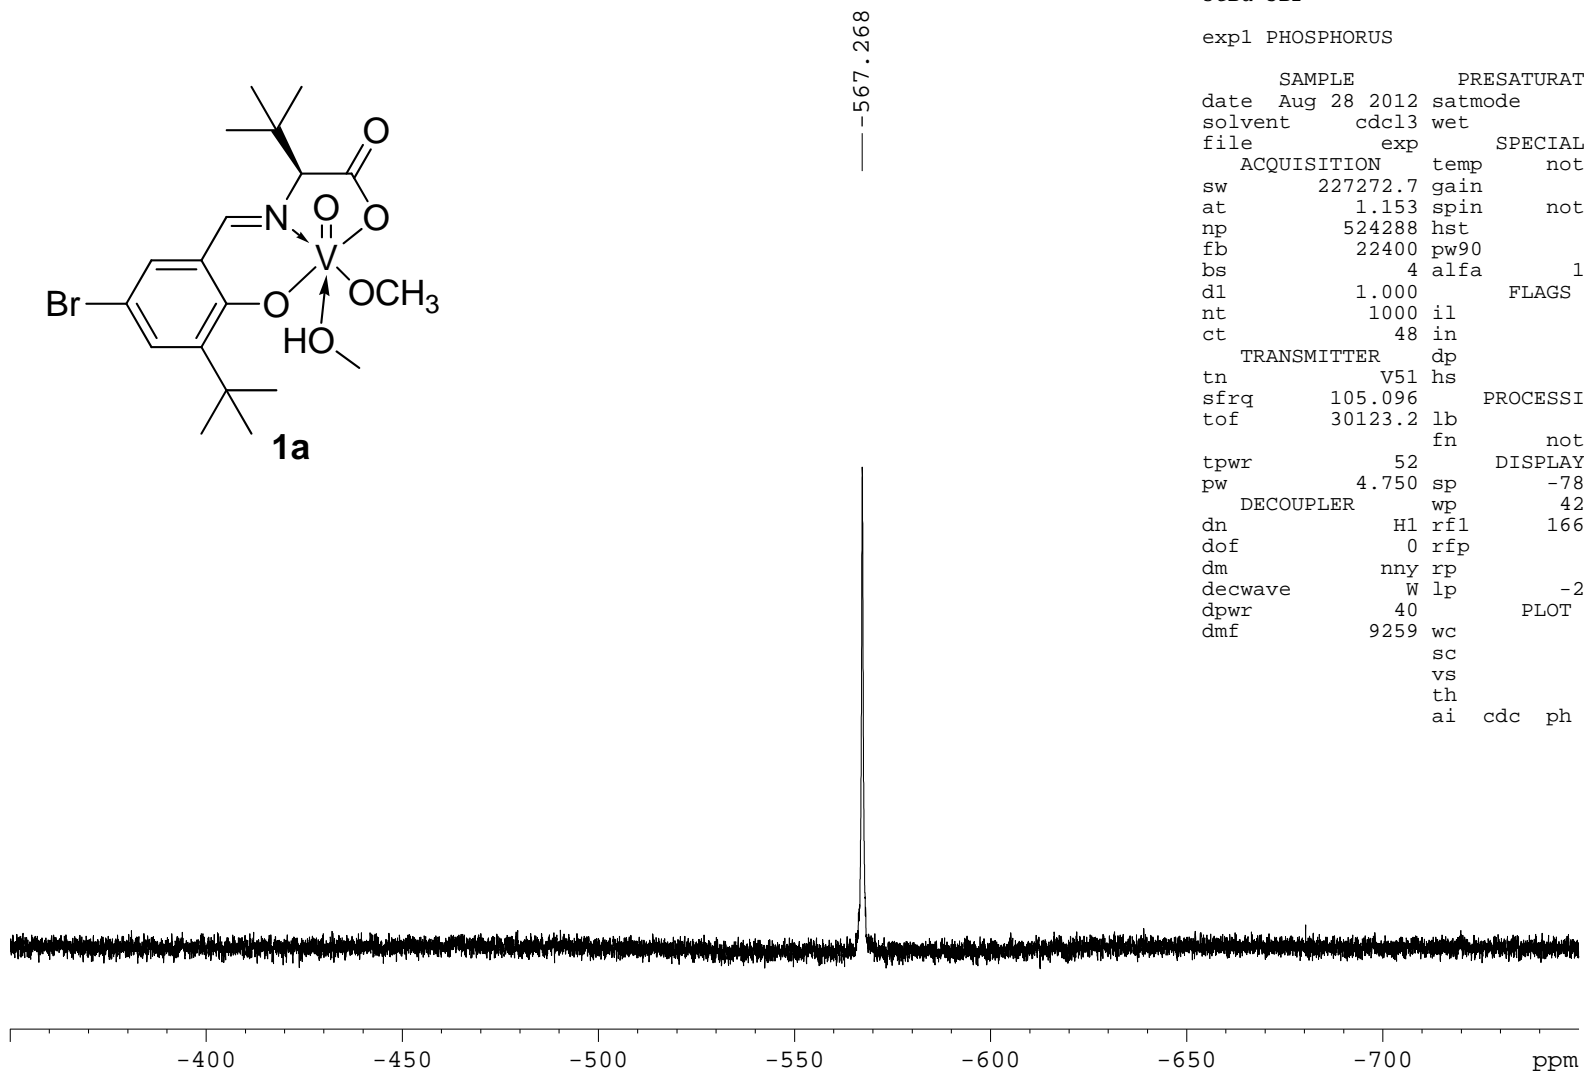

3tBu-5Br

exp1 PHOSPHORUS

| SAMPLE      |             | PRESATURATION |          |
|-------------|-------------|---------------|----------|
| date        | Aug 28 2012 | satmode       | n        |
| solvent     | cdcl3       | wet           | n        |
| file        | exp         | SPECIAL       |          |
| ACQUISITION |             | temp          |          |
| sw          | 227272.7    | gain          | 50       |
| at          | 1.153       | spin          | not used |
| np          | 524288      | hst           | 0.008    |
| fb          | 22400       | pw90          | 9.500    |
| bs          | 4           | alfa          | 10.000   |
| dl          | 1.000       | FLAGS         |          |
| nt          | 1000        | il            | n        |
| ct          | 48          | in            | n        |
| TRANSMITTER |             | dp            |          |
| tn          | V51         | hs            | nn       |
| sfrq        | 105.096     | PROCESSING    |          |
| toF         | 30123.2     | lb            | 3.00     |
|             |             | fn            | not used |
| tpwr        | 52          | DISPLAY       |          |
| pw          | 4.750       | sp            | -78862.8 |
| DECOUPLER   |             | wp            | 42059.6  |
| dn          | H1          | rf1           | 166678.9 |
| dof         | 0           | rfp           | 0        |
| dm          | nny         | rp            | -37.1    |
| decwave     | W           | lp            | -2861.6  |
| dpwr        | 40          | PLOT          |          |
| dmf         | 9259        | wc            | 240      |
|             |             | sc            | 0        |
|             |             | vs            | 754      |
|             |             | th            | 13       |
|             |             | ai            | cdc ph   |

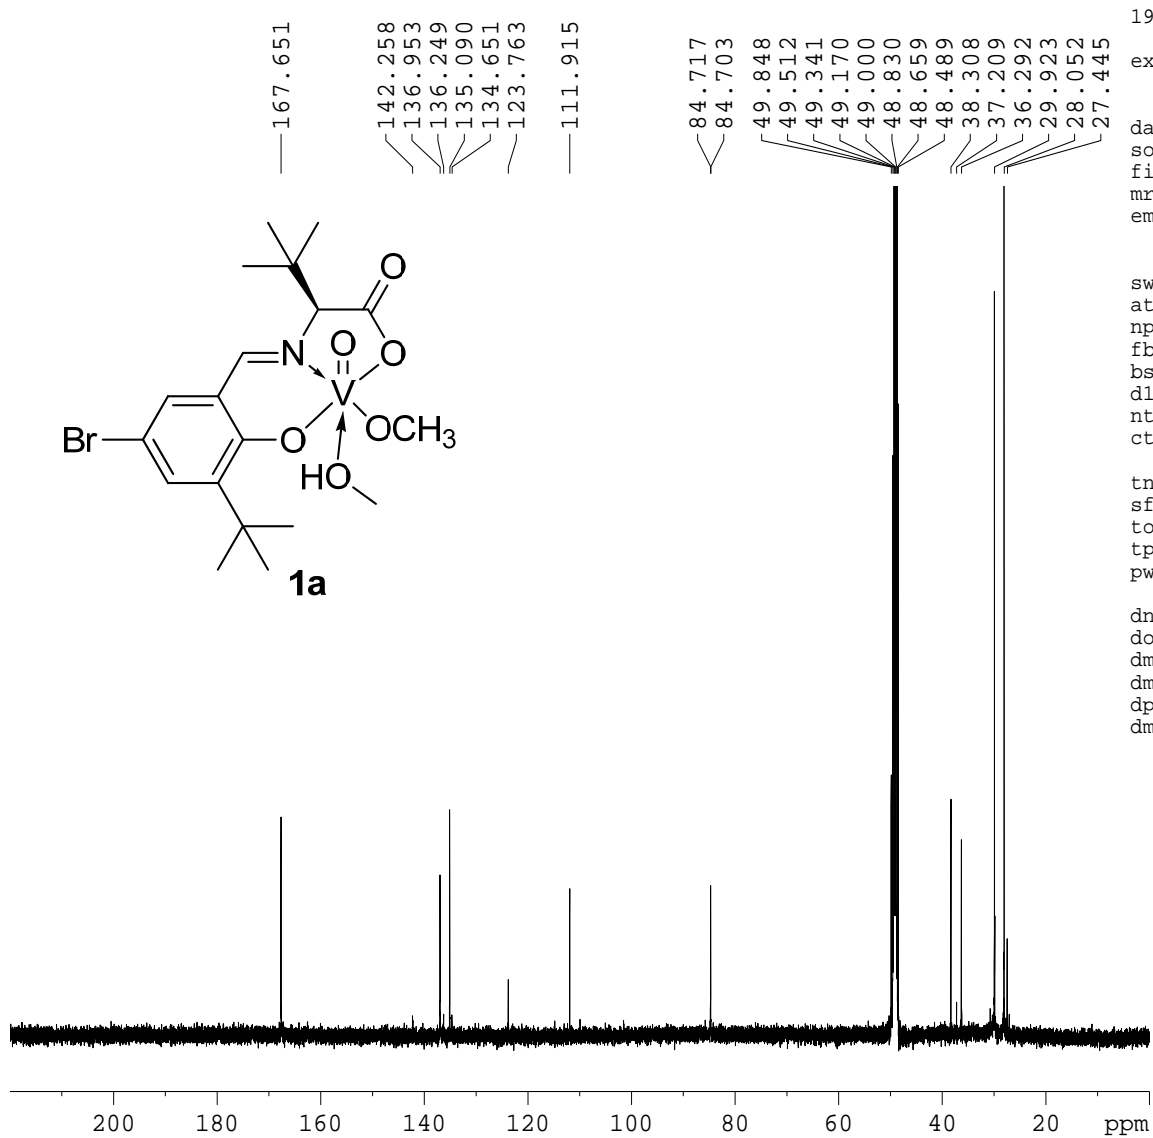

197

exp33 Carbon

| SAMPLE              |                | SPECIAL |          |
|---------------------|----------------|---------|----------|
| date                | Jun 16 2014    | temp    | not used |
| solvent             | cd3od          | gain    | not used |
| file                | /home/oper/vn~ | spin    | not used |
| mrsys/data/NTHU_ch~ |                | hst     | 0.008    |
| em/CHEN/chen140616~ |                | pw90    | 12.500   |
| .001C.fid           | alfa           |         | 10.000   |

| ACQUISITION |          | FLAGS      |          |
|-------------|----------|------------|----------|
| sw          | 36363.6  | il         | n        |
| at          | 0.511    | in         | n        |
| np          | 37172    | dp         | y        |
| fb          | not used | hs         | nn       |
| bs          | 16       | PROCESSING |          |
| d1          | 2.000    | lb         | 3.00     |
| nt          | 30000    | fn         | not used |
| ct          | 22944    | DISPLAY    |          |

| TRANSMITTER |         |     |         |
|-------------|---------|-----|---------|
| tn          | C13     | sp  | -0.9    |
| sfrq        | 125.692 | wp  | 27647.8 |
| tof         | 3140.4  | rfl | 9114.2  |
| tpwr        | 55      | rpf | 6158.1  |
| pw          | 6.250   | rp  | -26.4   |
| DECOUPLER   |         | lp  | -145.6  |

|      |       | PLOT |     |
|------|-------|------|-----|
| dn   | H1    |      |     |
| dof  | 0     | wc   | 250 |
| dm   | YYY   | sc   | 0   |
| dmm  | w     | vs   | 443 |
| dpwr | 38    | th   | 2   |
| dmf  | 11299 | nm   | ph  |

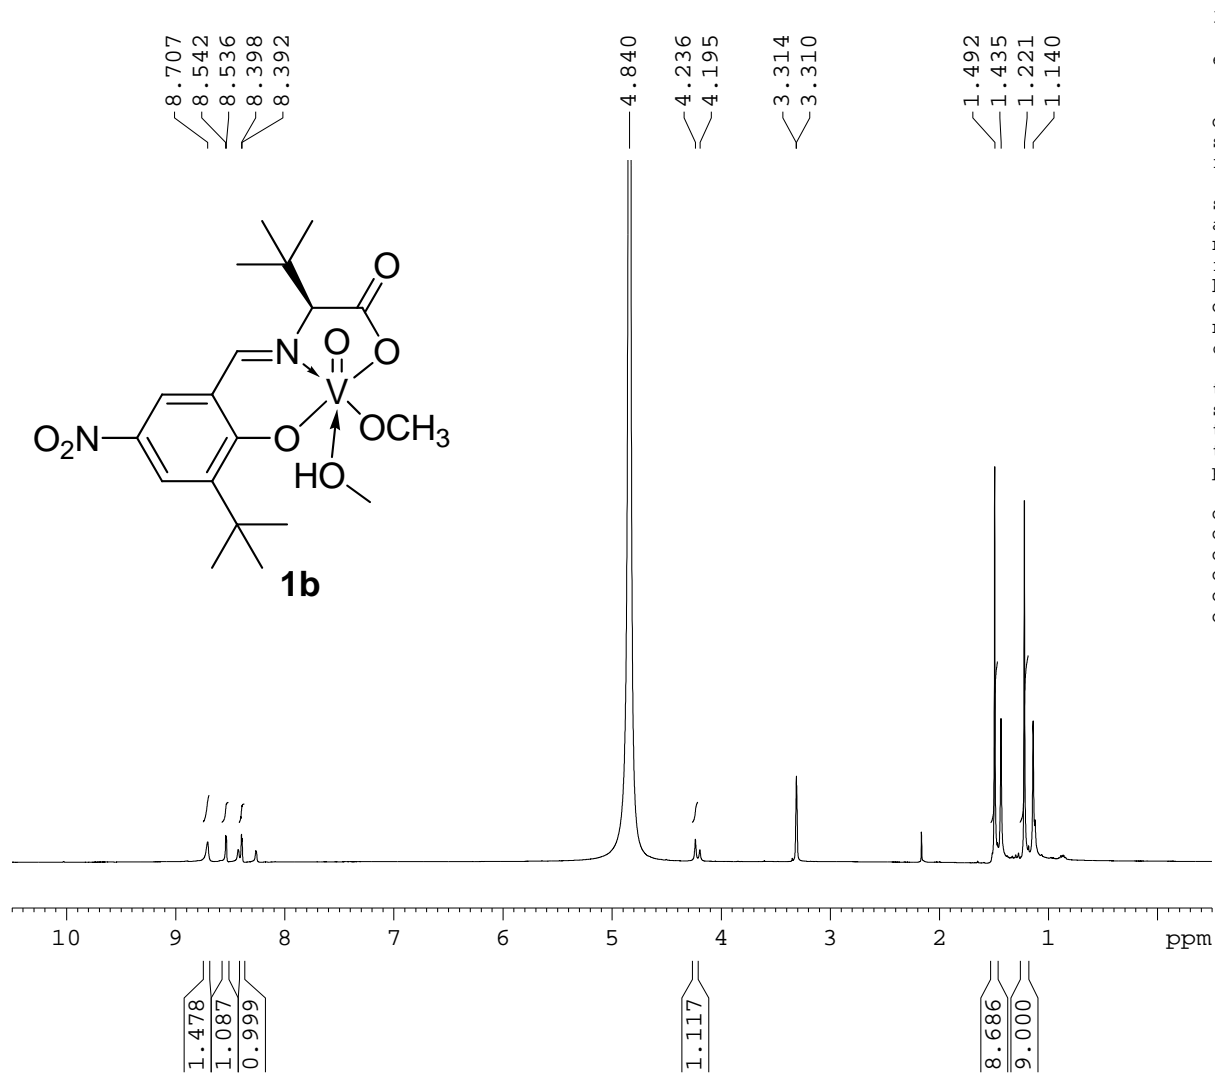

3tert5no2H

expl PROTON

| SAMPLE      |             | PRESATURATION |          |
|-------------|-------------|---------------|----------|
| date        | Jun 24 2014 | satmode       | n        |
| solvent     | cd3od       | wet           | n        |
| file        | exp         | SPECIAL       |          |
| ACQUISITION |             | temp          |          |
| sw          | 6410.3      | gain          | not used |
| at          | 2.556       | spin          | not used |
| np          | 32768       | hst           | 0.008    |
| fb          | 4000        | pw90          | 14.000   |
| bs          | 4           | alfa          | 10.000   |
| d1          | 1.000       | FLAGS         |          |
| nt          | 1000        | il            | n        |
| ct          | 100         | in            | n        |
| TRANSMITTER |             | dp            |          |
| tn          | H1          | hs            | nn       |
| sfrq        | 399.766     | PROCESSING    |          |
| tof         | 399.7       | fn            | not used |
| tpwr        | 61          | DISPLAY       |          |
| pw          | 7.000       | sp            | -160.4   |
| DECOUPLER   |             | wp            | 3837.4   |
| dn          | C13         | rfl           | 2121.4   |
| dof         | 0           | rpf           | 1323.2   |
| dm          | nnn         | rp            | -156.1   |
| decwave     | W40_atb     | lp            | 0        |
| dpwr        | 39          | PLOT          |          |
| dmf         | 29412       | wc            | 215      |
|             |             | sc            | 35       |
|             |             | vs            | 156      |
|             |             | th            | 1        |
|             |             | ai            | cdc ph   |

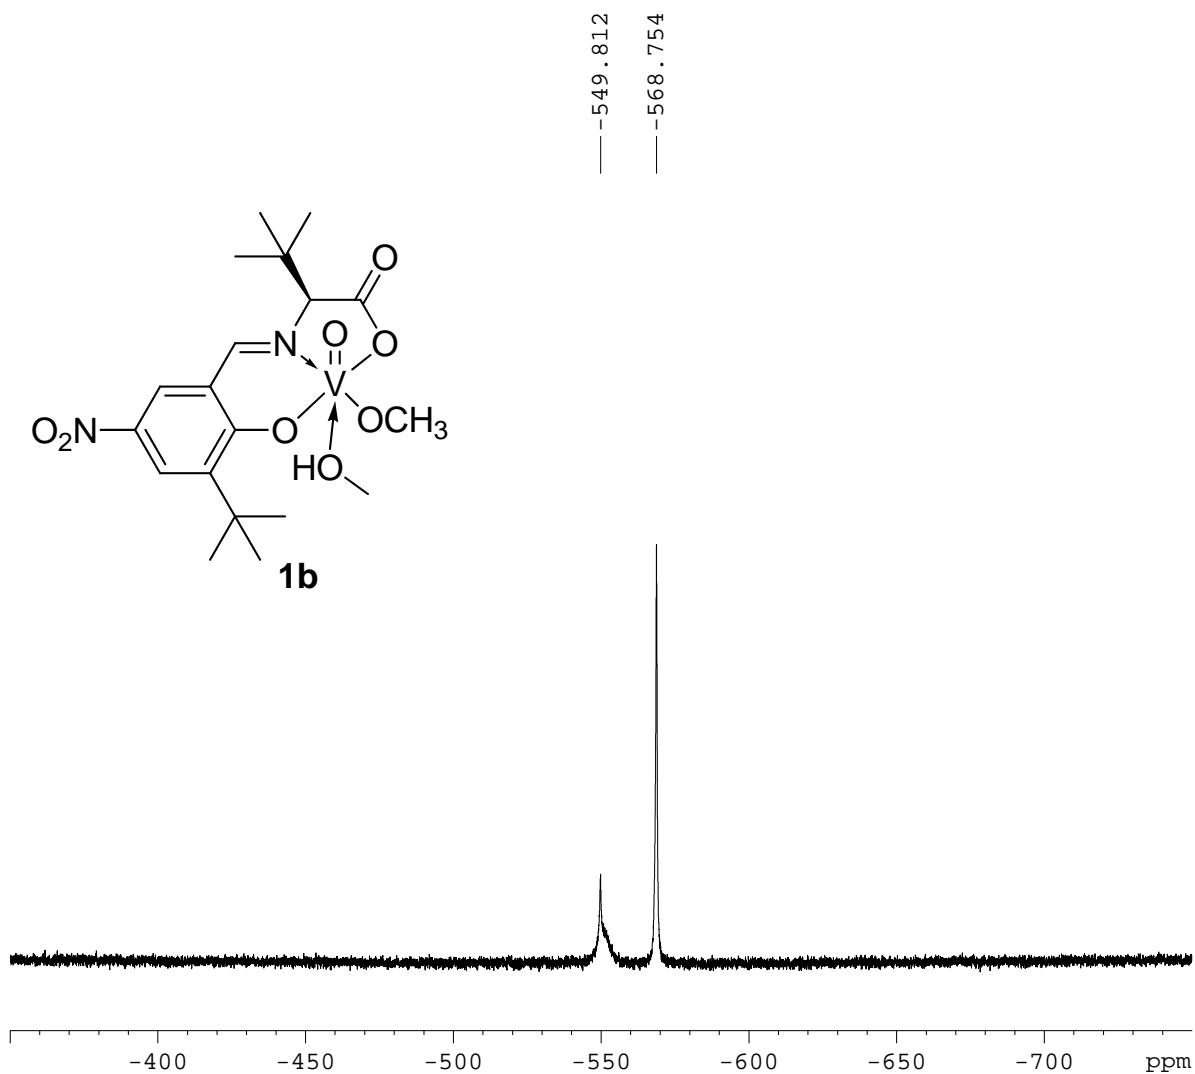

NO2tertV

exp2 PHOSPHORUS

| SAMPLE      |             | PRESATURATION |          |
|-------------|-------------|---------------|----------|
| date        | Apr 12 2014 | satmode       | n        |
| solvent     | cd3od       | wet           | n        |
| file        | exp         | SPECIAL       |          |
| ACQUISITION |             | temp          |          |
| sw          | 227272.7    | gain          | not used |
| at          | 0.577       | spin          | 50       |
| np          | 262144      | hst           | not used |
| fb          | 22400       | pw90          | 0.008    |
| bs          | 4           | alfa          | 9.500    |
| d1          | 1.000       | 10.000        |          |
|             |             | FLAGS         |          |
| nt          | 1000        | il            | n        |
| ct          | 164         | in            | n        |
| TRANSMITTER |             | dp            |          |
| tn          | V51         | hs            | nn       |
| sfrq        | 105.088     | PROCESSING    |          |
| tof         | 22089.8     | lb            | 3.00     |
|             |             | fn            | not used |
| tpwr        | 52          | DISPLAY       |          |
| pw          | 4.750       | sp            | -78862.8 |
| DECOUPLER   |             | wp            | 42058.8  |
| dn          | H1          | rfl           | 174712.3 |
| dof         | 0           | rpf           | 0        |
| dm          | nny         | rp            | -106.7   |
| decwave     | W           | lp            | -923.0   |
| dpwr        | 40          | PLOT          |          |
| dmf         | 8889        | wc            | 215      |
|             |             | sc            | 0        |
|             |             | vs            | 2517     |
|             |             | th            | 14       |
|             |             | ai            | cdc ph   |

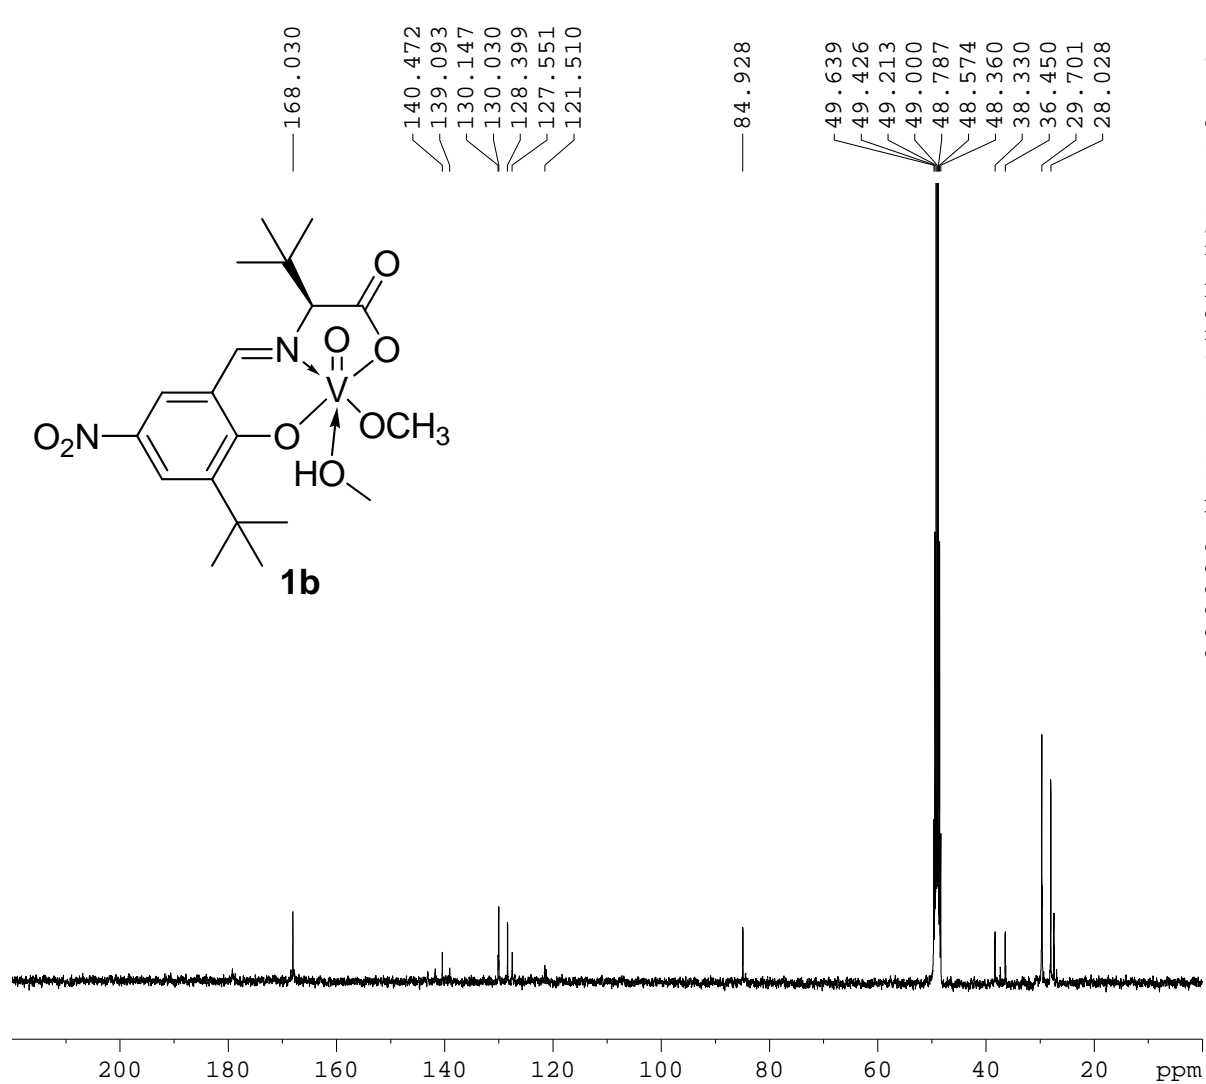

3tert5no2C

exp33 CARBON

| SAMPLE      |             | PRESATURATION |          |
|-------------|-------------|---------------|----------|
| date        | Jun 24 2014 | satmode       | n        |
| solvent     | cd3od       | wet           | n        |
| file        | exp         | SPECIAL       |          |
| ACQUISITION |             | temp          |          |
| sw          | 25510.2     | gain          | 30       |
| at          | 1.285       | spin          | not used |
| np          | 65536       | hst           | 0.008    |
| fb          | 17000       | pw90          | 9.800    |
| bs          | 4           | alfa          | 10.000   |
| dl          | 1.000       | FLAGS         |          |
| nt          | 100000      | il            | n        |
| ct          | 988         | in            | n        |
| TRANSMITTER |             | dp            |          |
| tn          | C13         | hs            | nn       |
| sfrq        | 100.532     | PROCESSING    |          |
| tof         | 1530.7      | fn            | not used |
| tpwr        | 60          | DISPLAY       |          |
| pw          | 4.900       | sp            | -0.9     |
| DECOUPLER   |             | wp            | 22114.3  |
| dn          | H1          | rfl           | 6483.4   |
| dof         | 0           | rpf           | 4925.5   |
| dm          | yyy         | rp            | -90.2    |
| decwave     | W           | lp            | 14.0     |
| dpwr        | 41          | PLOT          |          |
| dmf         | 10695       | wc            | 250      |
|             |             | sc            | 0        |
|             |             | vs            | 405      |
|             |             | th            | 5        |
|             |             | nm            | cdc ph   |

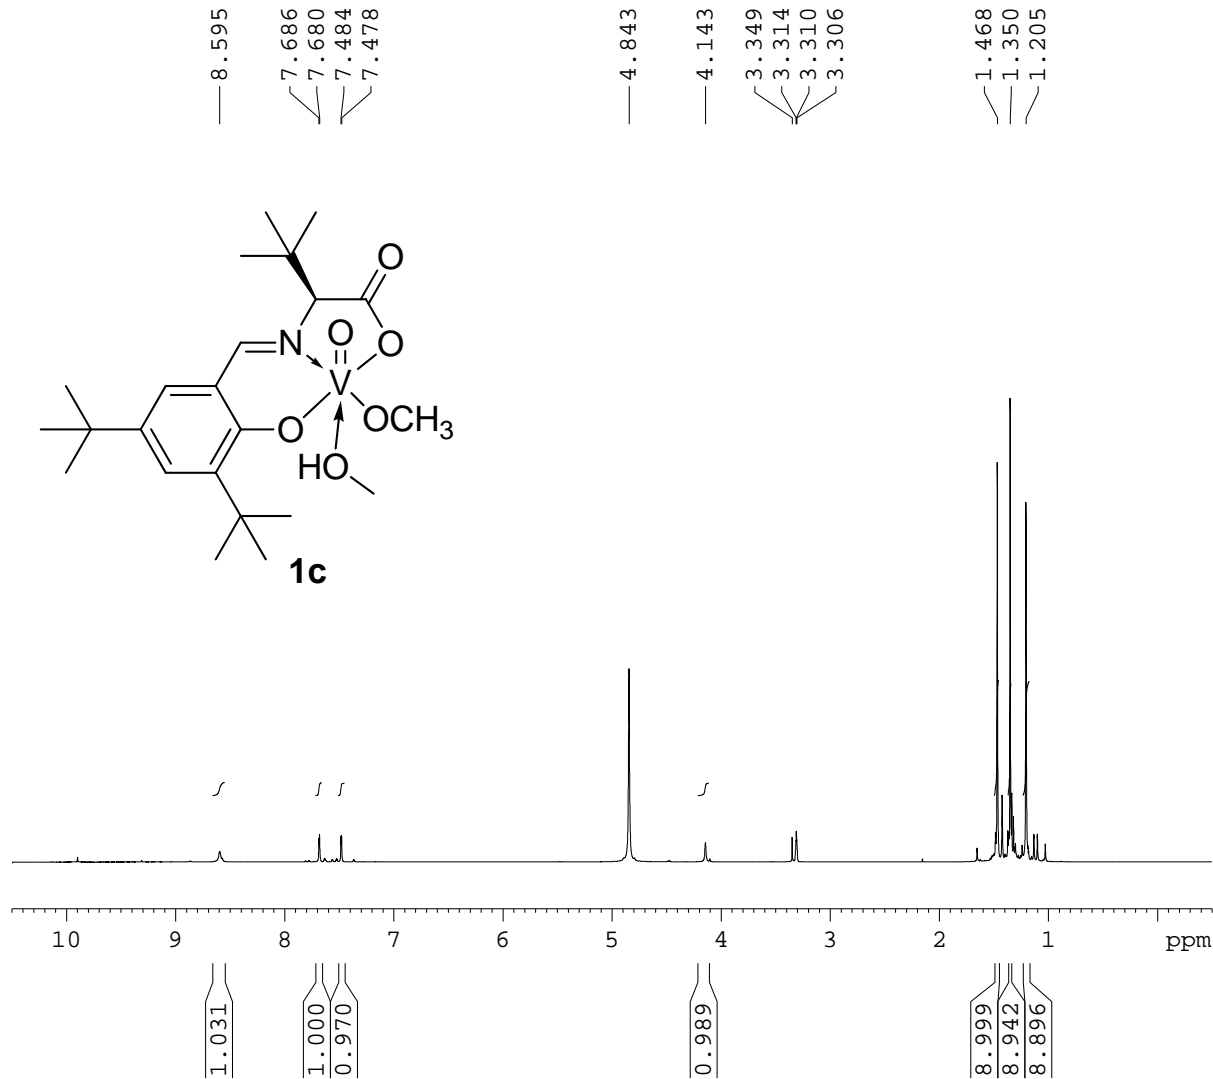

ditertH

exp33 PROTON

| SAMPLE      |             | PRESATURATION |          |
|-------------|-------------|---------------|----------|
| date        | Jun 25 2014 | satmode       | n        |
| solvent     | cd3od       | wet           | n        |
| file        | exp         | SPECIAL       |          |
| ACQUISITION |             | temp          |          |
| sw          | 6410.3      | gain          | not used |
| at          | 2.556       | spin          | not used |
| np          | 32768       | hst           | 0.008    |
| fb          | 4000        | pw90          | 14.000   |
| bs          | 4           | alfa          | 10.000   |
| d1          | 1.000       | FLAGS         |          |
| nt          | 1000        | il            | n        |
| ct          | 104         | in            | n        |
| TRANSMITTER |             | dp            |          |
| tn          | H1          | hs            | nn       |
| sfrq        | 399.766     | PROCESSING    |          |
| tof         | 399.7       | fn            | not used |
| tpwr        | 61          | DISPLAY       |          |
| pw          | 7.000       | sp            | -199.9   |
| DECOUPLER   |             | wp            | 4197.3   |
| dn          | C13         | rfl           | 2121.4   |
| dof         | 0           | rpf           | 1323.2   |
| dm          | nnn         | rp            | -155.5   |
| decwave     | W40_atb     | lp            | 2.9      |
| dpwr        | 39          | PLOT          |          |
| dmf         | 29412       | wc            | 215      |
|             |             | sc            | 35       |
|             |             | vs            | 945      |
|             |             | th            | 15       |
|             |             | ai            | cdc ph   |

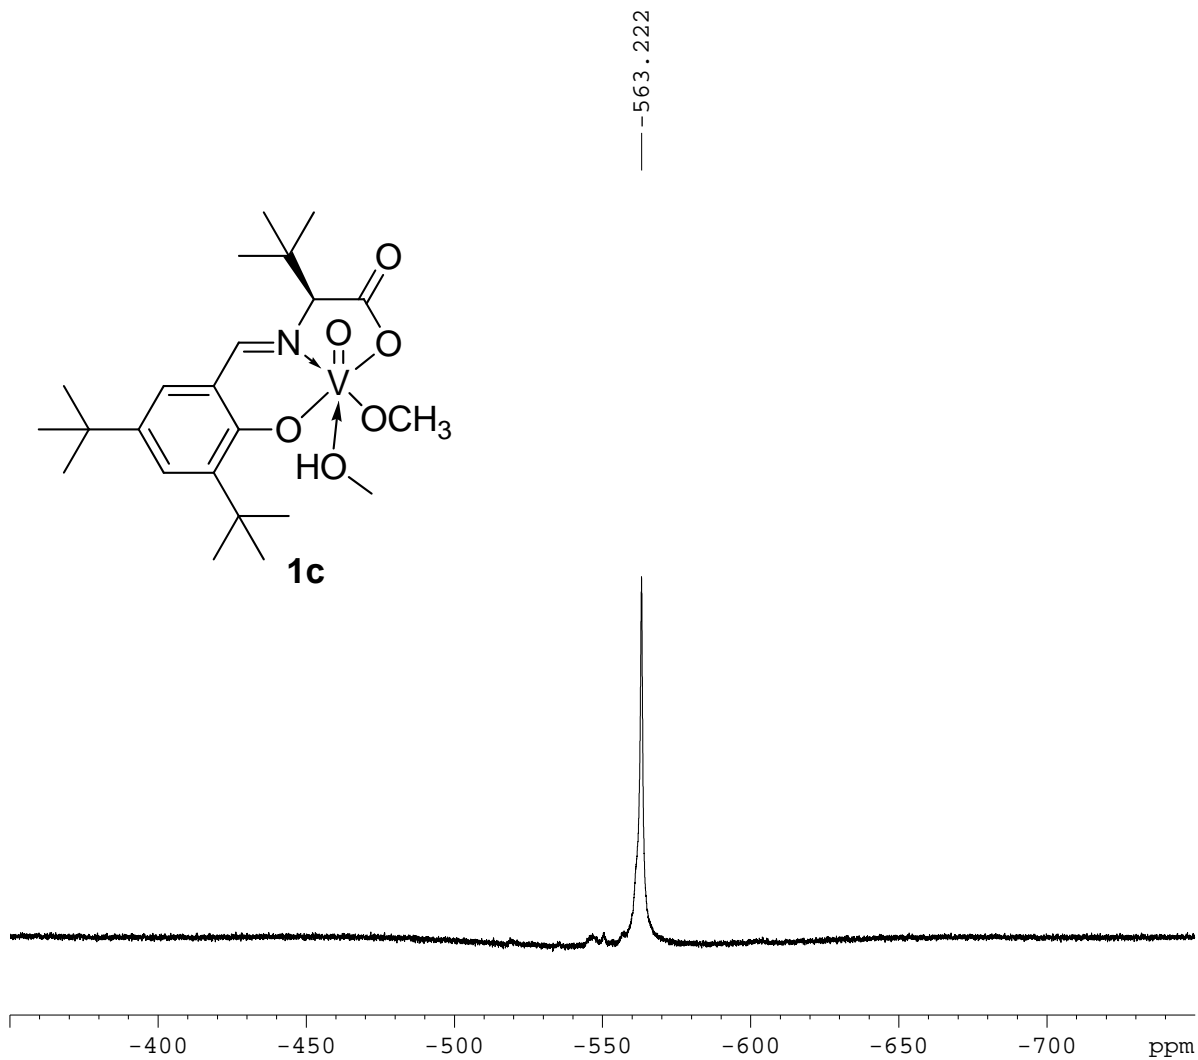

ditertV

exp2 PHOSPHORUS

|         | SAMPLE      | PRESATURATION |          |
|---------|-------------|---------------|----------|
| date    | Mar 19 2014 | satmode       | n        |
| solvent | cd3od       | wet           | n        |
| file    | exp         | SPECIAL       |          |
|         | ACQUISITION | temp          | not used |
| sw      | 227272.7    | gain          | 50       |
| at      | 0.577       | spin          | not used |
| np      | 262144      | hst           | 0.008    |
| fb      | 22400       | pw90          | 9.500    |
| bs      | 4           | alfa          | 10.000   |
| dl      | 1.000       | FLAGS         |          |
| nt      | 1000        | il            | n        |
| ct      | 164         | in            | n        |
|         | TRANSMITTER | dp            | y        |
| tn      | V51         | hs            | nn       |
| sfrq    | 105.088     | PROCESSING    |          |
| tof     | 22089.8     | lb            | 3.00     |
|         |             | fn            | not used |
| tpwr    | 52          | DISPLAY       |          |
| pw      | 4.750       | sp            | -78862.8 |
|         | DECOUPLER   | wp            | 42058.8  |
| dn      | H1          | rfl           | 174712.3 |
| dof     | 0           | rfp           | 0        |
| dm      | nny         | rp            | -106.7   |
| decwave | W           | lp            | -923.0   |
| dpwr    | 40          | PLOT          |          |
| dmf     | 8889        | wc            | 215      |
|         |             | sc            | 0        |
|         |             | vs            | 2517     |
|         |             | th            | 14       |
|         |             | ai            | cdc ph   |

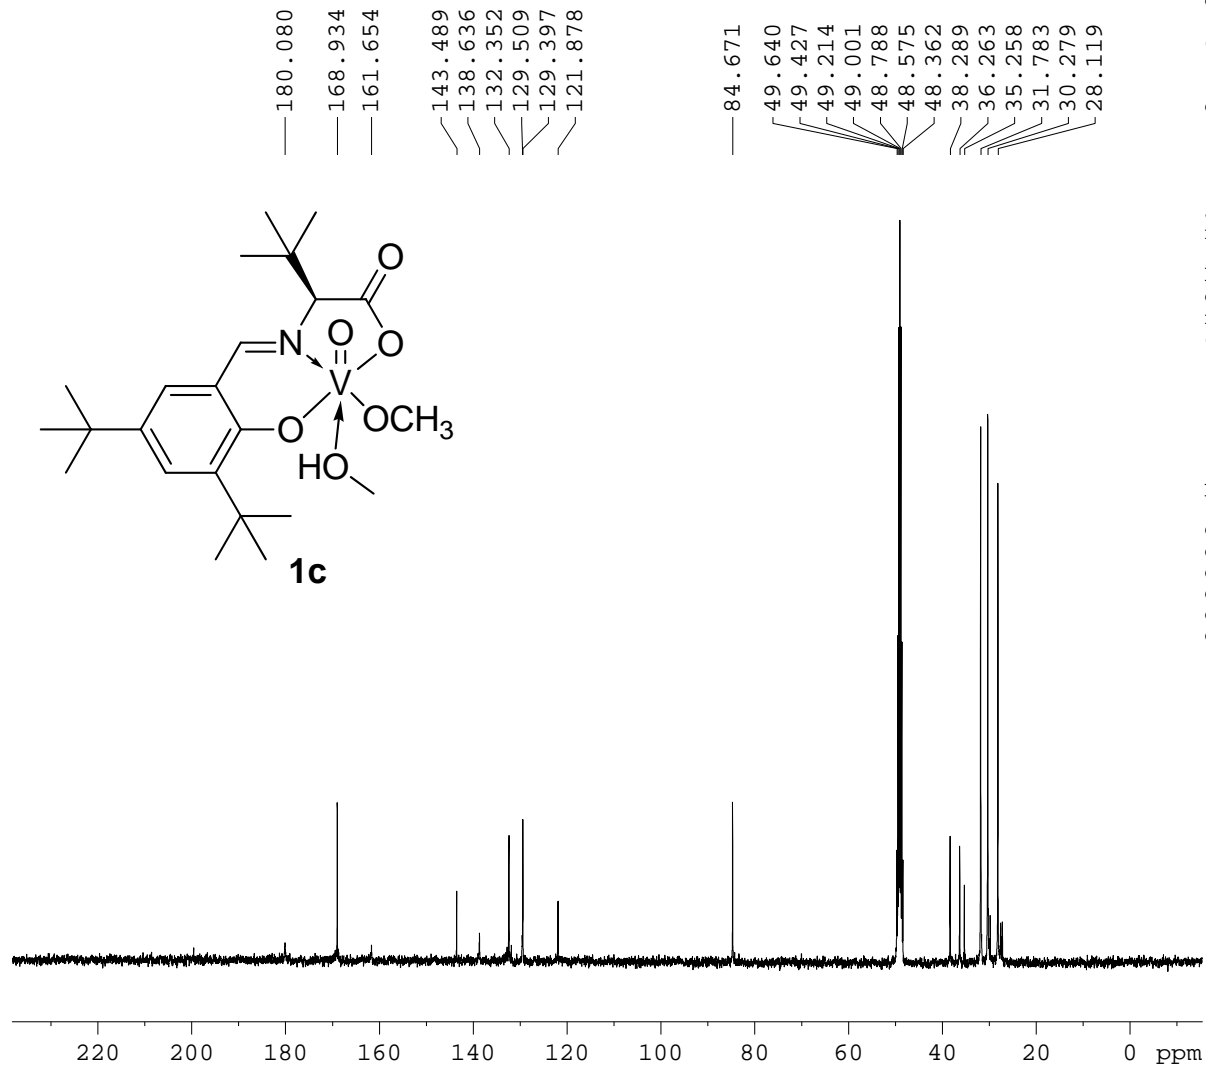

ditertC

exp33 CARBON

|             | SAMPLE      | PRESATURATION |          |
|-------------|-------------|---------------|----------|
| date        | Jun 25 2014 | satmode       | n        |
| solvent     | cd3od       | wet           | n        |
| file        | exp         | SPECIAL       |          |
| ACQUISITION |             | temp          | not used |
| sw          | 25510.2     | gain          | 30       |
| at          | 1.285       | spin          | not used |
| np          | 65536       | hst           | 0.008    |
| fb          | 17000       | pw90          | 9.800    |
| bs          | 4           | alfa          | 10.000   |
| dl          | 1.000       | FLAGS         |          |
| nt          | 100000      | il            | n        |
| ct          | 1036        | in            | n        |
| TRANSMITTER |             | dp            | y        |
| tn          | C13         | hs            | nn       |
| sfrq        | 100.532     | PROCESSING    |          |
| tof         | 1530.7      | lb            | 3.00     |
| tpwr        | 60          | fn            | not used |
| pw          | 4.900       | DISPLAY       |          |
| DECOUPLER   |             | sp            | -0.9     |
| dn          | H1          | wp            | 22114.3  |
| dof         | 0           | rfl           | 6480.3   |
| dm          | YY          | rfp           | 4925.5   |
| decwave     | W           | rp            | -91.9    |
| dpwr        | 41          | lp            | 27.2     |
| dmf         | 10695       | PLOT          |          |
|             |             | wc            | 250      |
|             |             | sc            | 0        |
|             |             | vs            | 333      |
|             |             | th            | 7        |
|             |             | nm            | cdc ph   |



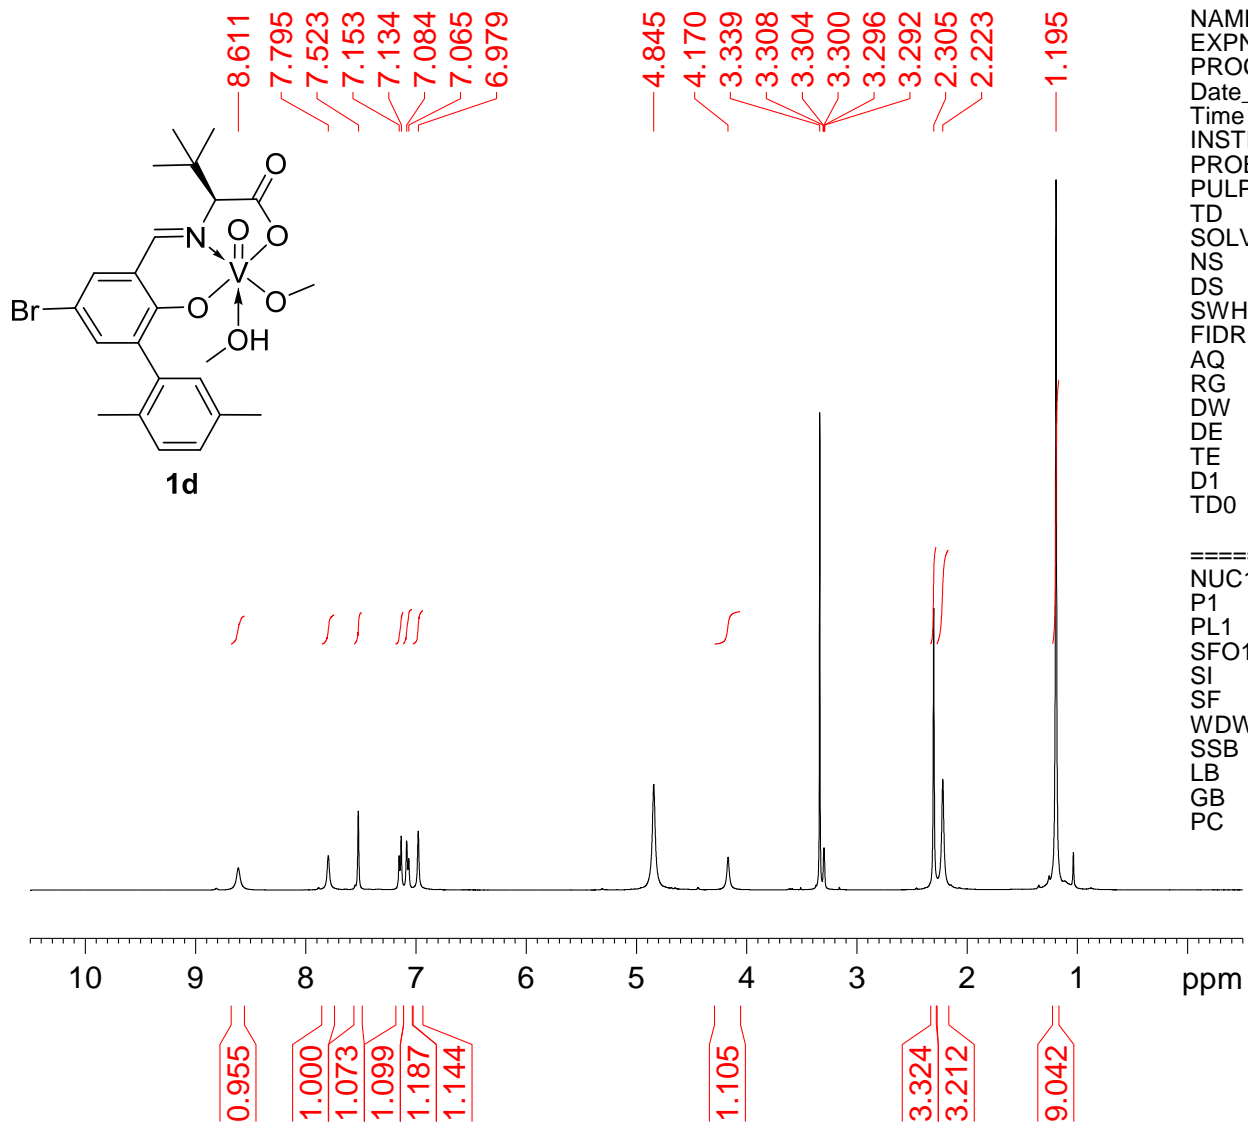

NAME 2-5-dimethyl-Br-imine-cat-H-0308  
 EXPNO 1  
 PROCNO 1  
 Date\_ 20160408  
 Time 13.38  
 INSTRUM spect  
 PROBHD 5 mm DUL 13C-1  
 PULPROG zg30  
 TD 32768  
 SOLVENT MeOD  
 NS 6  
 DS 0  
 SWH 6410.256 Hz  
 FIDRES 0.195625 Hz  
 AQ 2.5559540 sec  
 RG 4  
 DW 78.000 usec  
 DE 6.00 usec  
 TE 300.0 K  
 D1 2.00000000 sec  
 TD0 1

===== CHANNEL f1 =====  
 NUC1 1H  
 P1 10.00 usec  
 PL1 -2.40 dB  
 SFO1 400.1528010 MHz  
 SI 16384  
 SF 400.1500168 MHz  
 WDW EM  
 SSB 0  
 LB 0.00 Hz  
 GB 0  
 PC 1.00

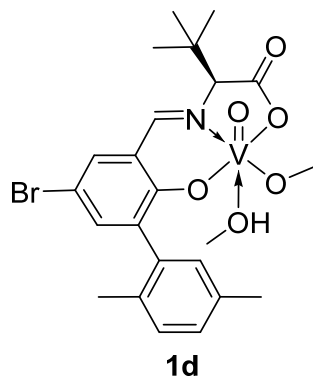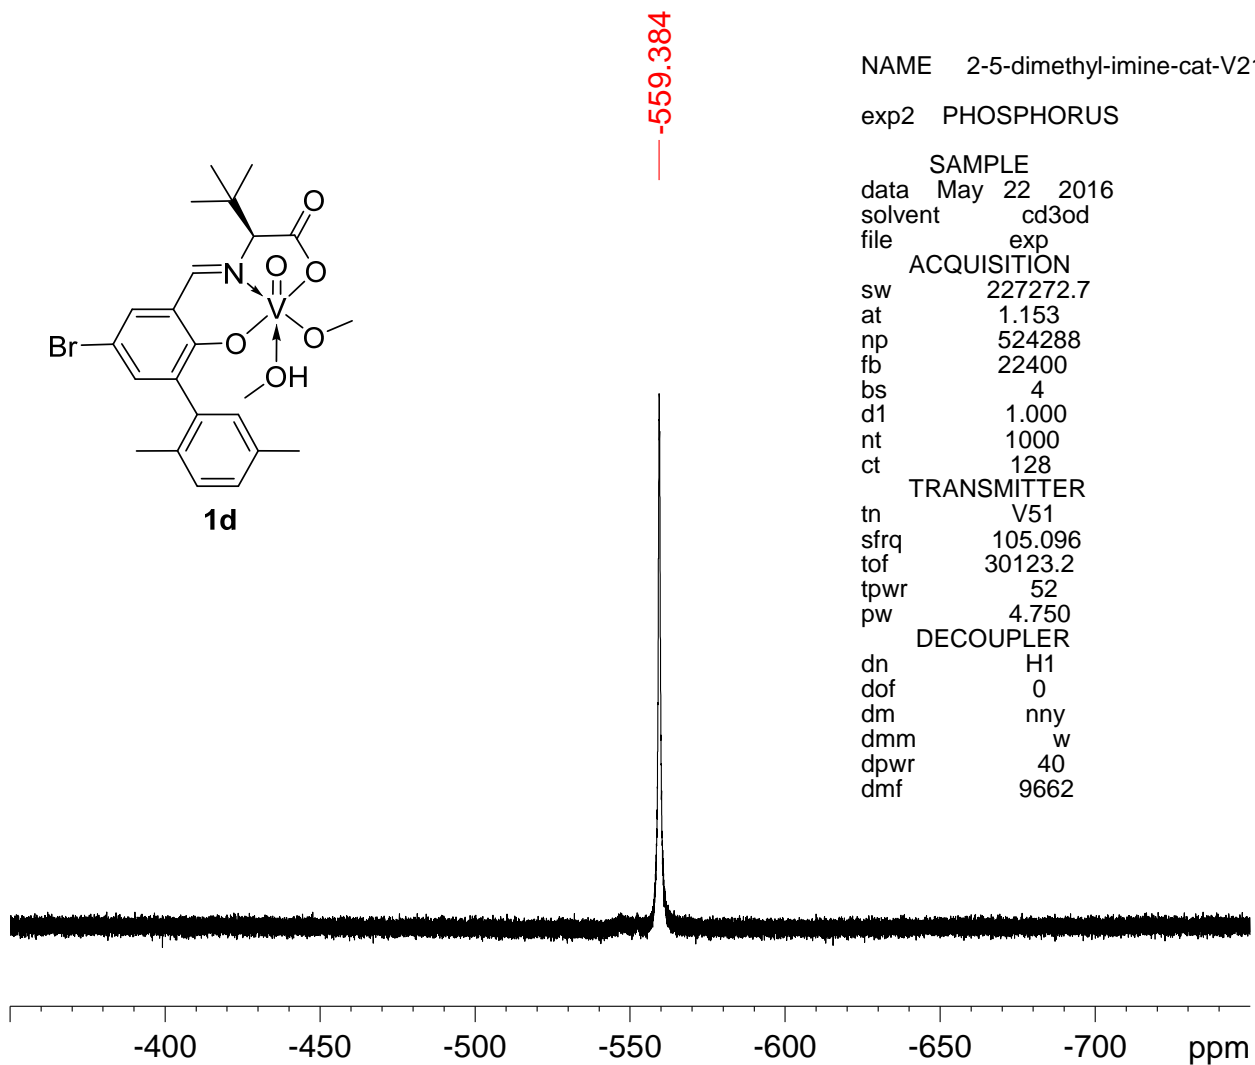

NAME 2-5-dimethyl-imine-cat-V214p.fid

exp2 PHOSPHORUS

SAMPLE  
 data May 22 2016  
 solvent cd3od  
 file exp  
 ACQUISITION  
 sw 227272.7  
 at 1.153  
 np 524288  
 fb 22400  
 bs 4  
 d1 1.000  
 nt 1000  
 ct 128

TRANSMITTER  
 tn V51  
 sfrq 105.096  
 tof 30123.2  
 tpwr 52  
 pw 4.750  
 DECOUPLER  
 dn H1  
 dof 0  
 dm nny  
 dmm w  
 dpwr 40  
 dmf 9662

PRESATURATION  
 satmode n  
 wet n  
 SPECIAL  
 temp not used  
 gain 50  
 spin not used  
 hst 0.008  
 pw90 9.500  
 alfa 10.000

FLAGS  
 il n  
 in n  
 dp y  
 hs nn

PROCESSING  
 lb 2.00  
 fn not used

DISPLY  
 sp -78862.8  
 wp 42059.6  
 rfl 166830.6  
 rfp 0  
 rp -123.8  
 lp -2861.6

PLOT  
 wc 250  
 sc 0  
 vs 3610  
 th 20  
 ai cdc ph

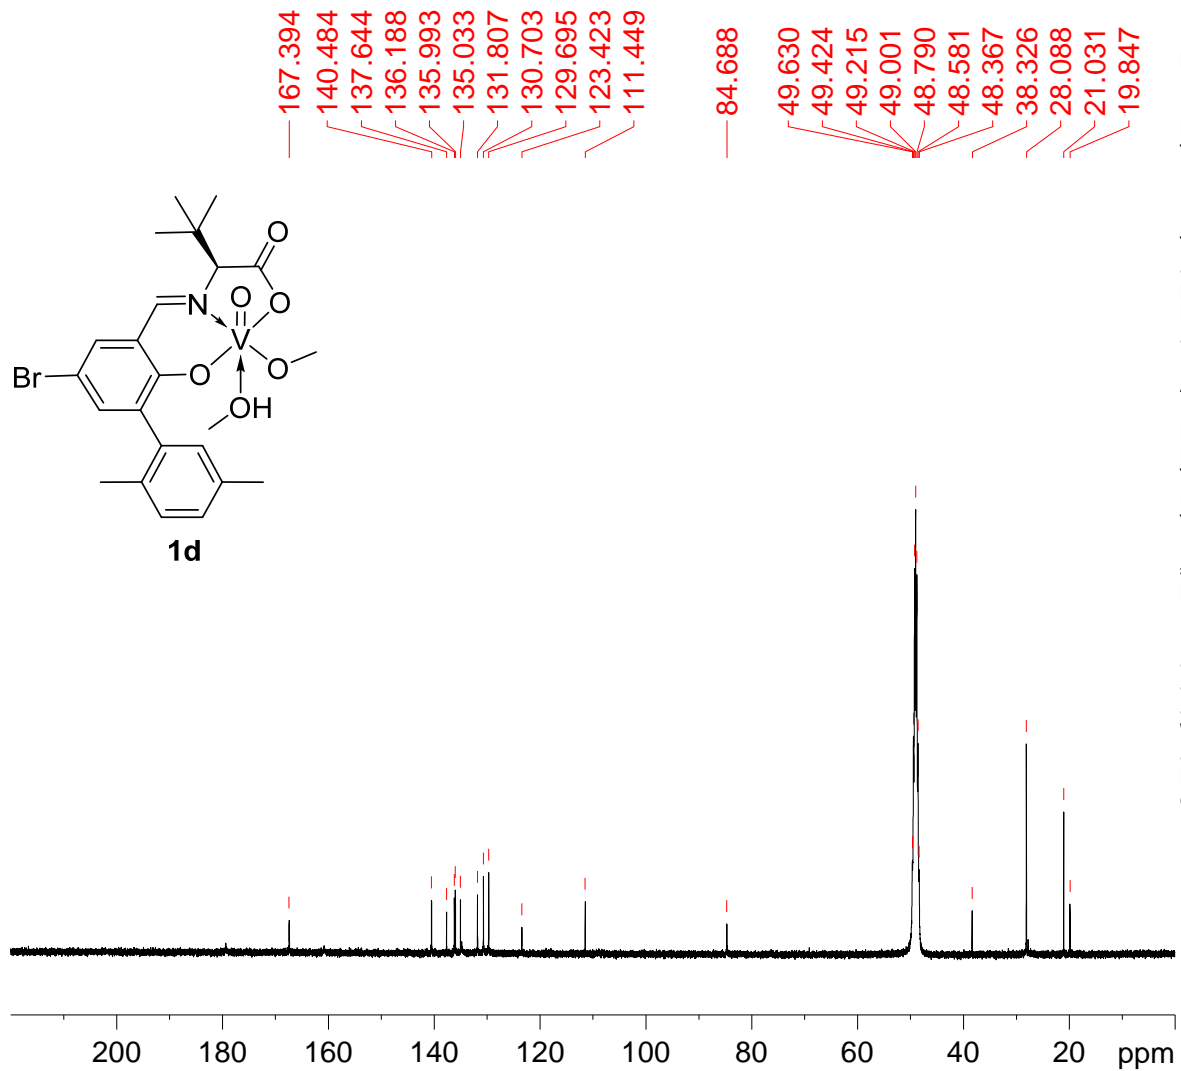

NAME 2-5-dimethyl-imine-cat-13C  
 EXPNO 3  
 PROCNO 1  
 Date\_ 20161208  
 Time 9.59  
 INSTRUM spect  
 PROBHD 5 mm DUL 13C-1  
 PULPROG zg30  
 TD 32768  
 SOLVENT MeOD  
 NS 172  
 DS 0  
 SWH 6410.256 Hz  
 FIDRES 0.195625 Hz  
 AQ 2.5559540 sec  
 RG 4  
 DW 78.000 usec  
 DE 6.00 usec  
 TE 300.0 K  
 D1 2.00000000 sec  
 TD0 1

===== CHANNEL f1 =====  
 NUC1 1H  
 P1 10.00 usec  
 PL1 -2.40 dB  
 SFO1 400.1528010 MHz  
 SI 16384  
 SF 400.1500168 MHz  
 WDW EM  
 SSB 0  
 LB 0.00 Hz  
 GB 0  
 PC 1.00

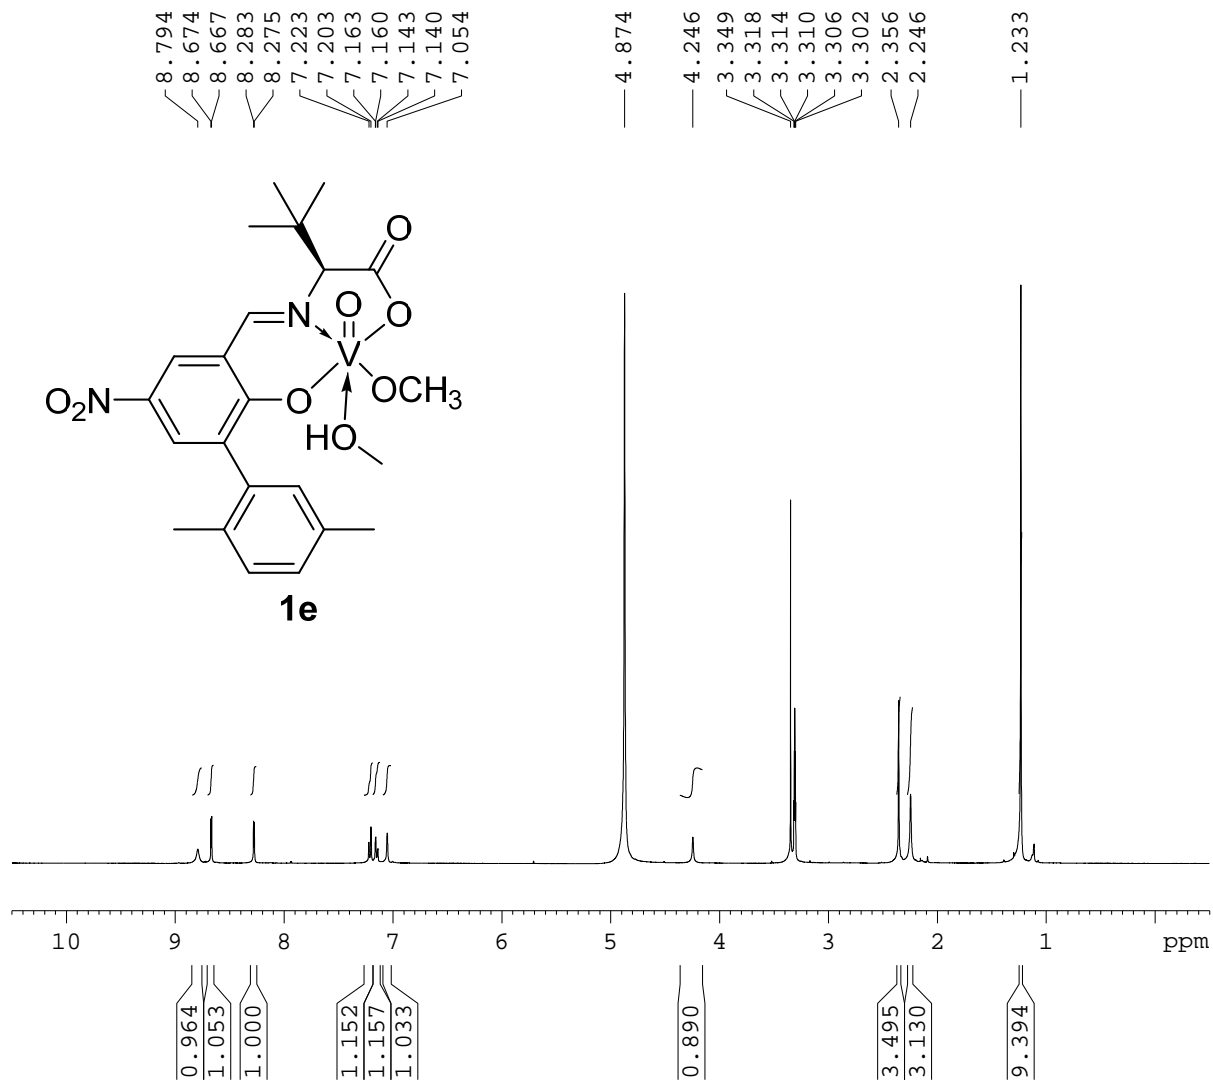

dimecatalyst3

exp33 PROTON

| SAMPLE      |             | PRESATURATION |          |
|-------------|-------------|---------------|----------|
| date        | Sep 18 2013 | satmode       | n        |
| solvent     | cd3od       | wet           | n        |
| file        | exp         | SPECIAL       |          |
| ACQUISITION |             | temp          |          |
| sw          | 6410.3      | gain          | not used |
| at          | 2.556       | spin          | not used |
| np          | 32768       | hst           | 0.008    |
| fb          | 4000        | pw90          | 14.000   |
| bs          | 4           | alfa          | 10.000   |
| d1          | 1.000       | FLAGS         |          |
| nt          | 1000        | il            | n        |
| ct          | 104         | in            | n        |
| TRANSMITTER |             | dp            |          |
| tn          | H1          | hs            | nn       |
| sfrq        | 399.766     | PROCESSING    |          |
| tof         | 399.7       | fn            | not used |
| tpwr        | 61          | DISPLAY       |          |
| pw          | 7.000       | sp            | -199.9   |
| DECOUPLER   |             | wp            | 4197.3   |
| dn          | C13         | rfl           | 2121.4   |
| dof         | 0           | rfp           | 1323.2   |
| dm          | nnn         | rp            | -155.5   |
| decwave     | W40_atb     | lp            | 2.9      |
| dpwr        | 39          | PLOT          |          |
| dmf         | 29412       | wc            | 215      |
|             |             | sc            | 35       |
|             |             | vs            | 945      |
|             |             | th            | 15       |
|             |             | ai            | cdc ph   |

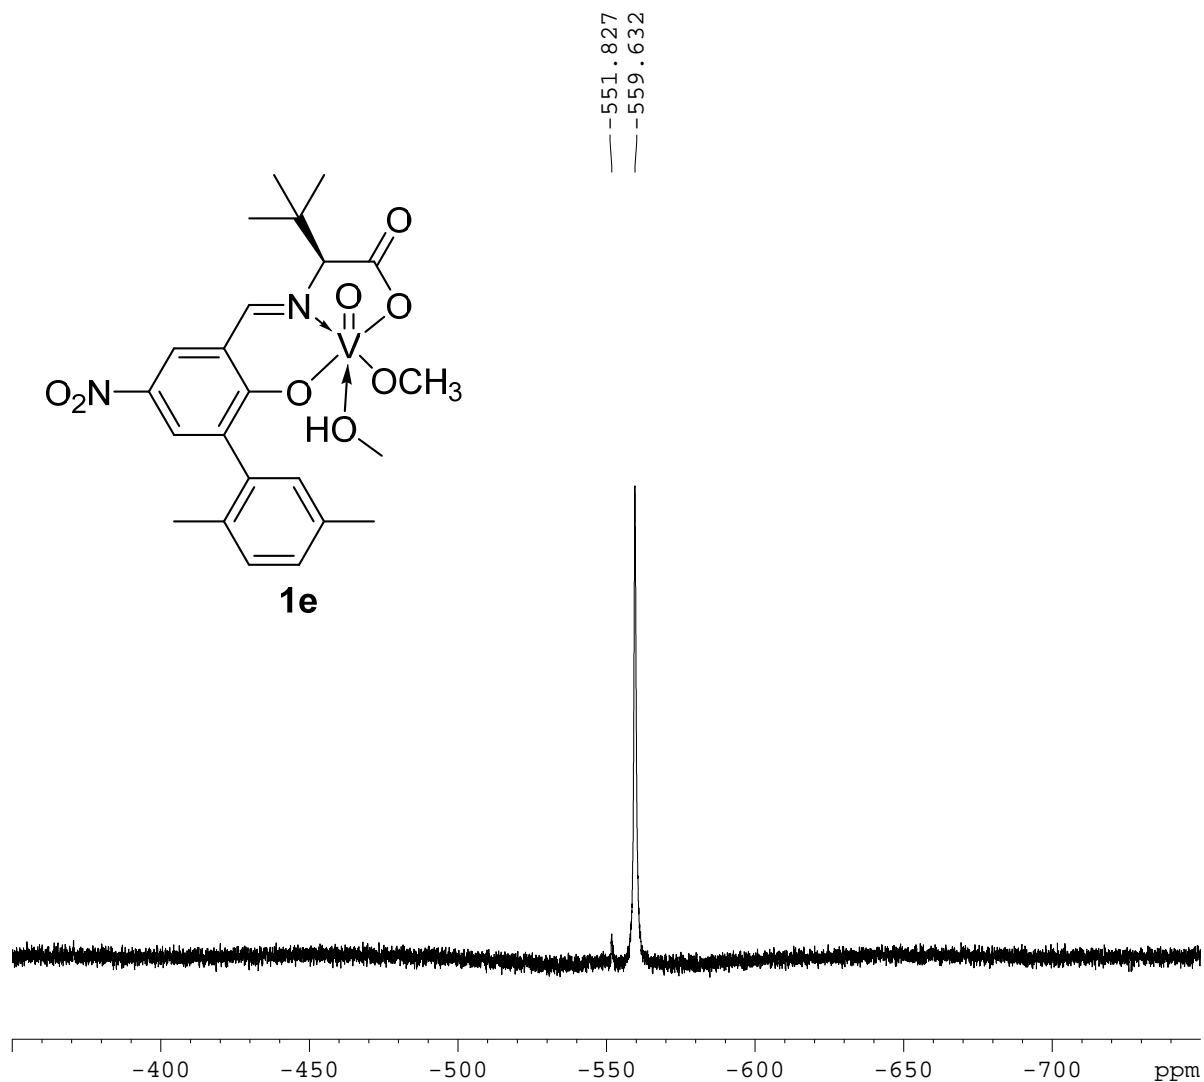

dime catalyst

exp3 PHOSPHORUS

| SAMPLE      |             | PRESATURATION |            |
|-------------|-------------|---------------|------------|
| date        | Sep 18 2013 | satmode       | n          |
| solvent     | cd3od       | wet           | n          |
| file        | exp         | SPECIAL       |            |
| ACQUISITION |             | temp          |            |
| sw          | 227272.7    | gain          | not used   |
| at          | 1.153       | spin          | 50         |
| np          | 524288      | hst           | not used   |
| fb          | 22400       | pw90          | 0.008      |
| bs          | 4           | alfa          | 9.500      |
| d1          | 1.000       |               | 10.000     |
| nt          | 1000        | il            | FLAGS      |
| ct          | 80          | in            | n          |
| tn          | V51         | dp            | n          |
| sfrq        | 105.096     | hs            | nn         |
| tof         | 30123.2     | lb            | PROCESSING |
| tpwr        | 52          | fn            | not used   |
| pw          | 4.750       | sp            | 3.00       |
| dn          | H1          | wp            | DISPLAY    |
| dof         | 0           | rf1           | -78862.8   |
| dm          | nny         | rfp           | 42059.6    |
| decwave     | W           | lp            | 166678.9   |
| dpwr        | 40          | rp            | 0          |
| dmf         | 8889        | lp            | 70.9       |
|             |             | W             | -2861.6    |
|             |             | W             | PLOT       |
|             |             | sc            | 250        |
|             |             | vs            | 0          |
|             |             | th            | 1156       |
|             |             | ai            | 8          |
|             |             | ai            | cdc ph     |

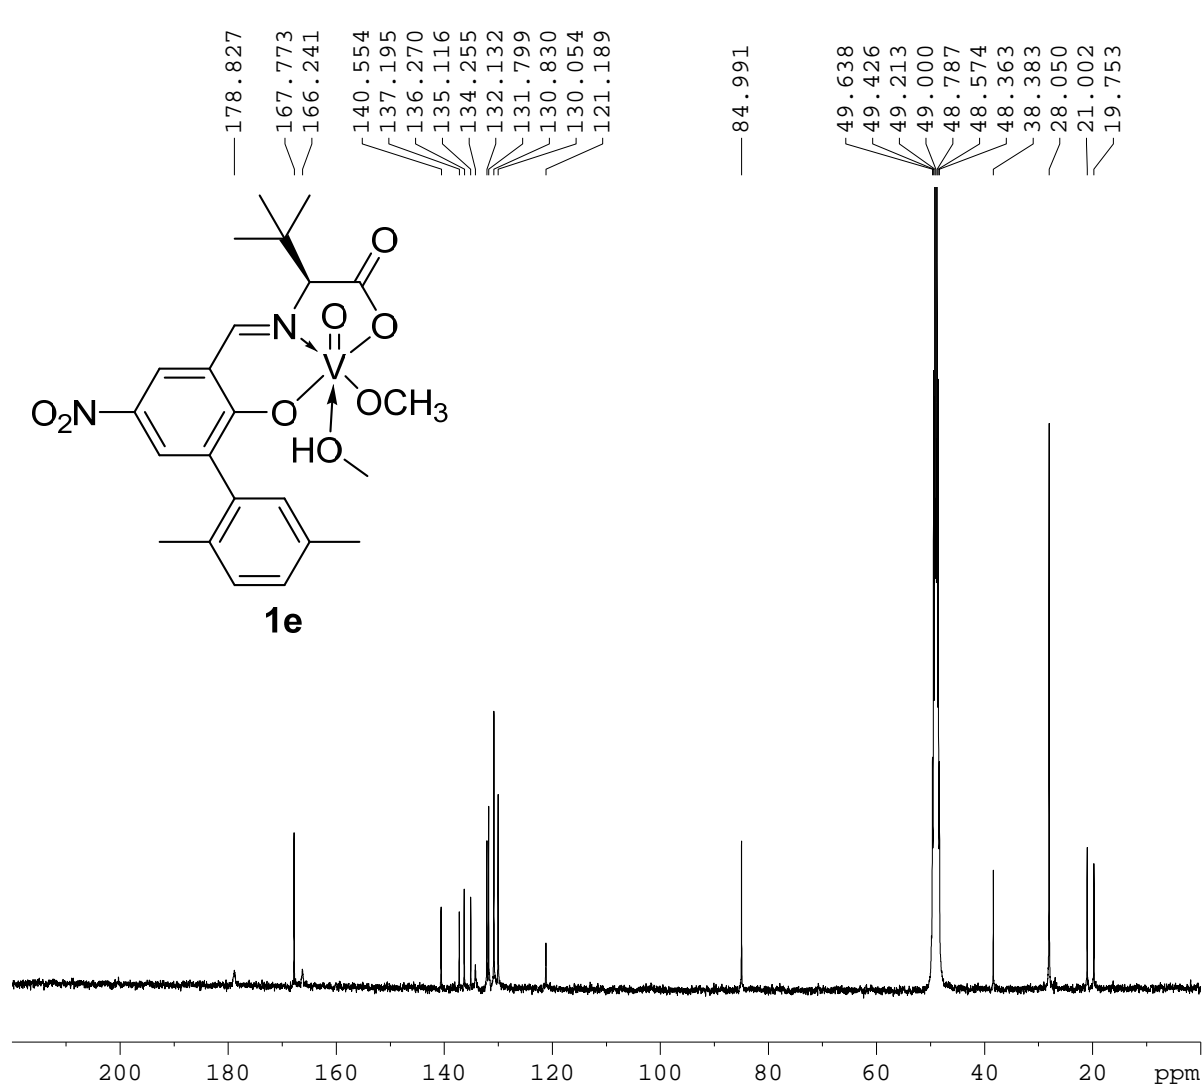

25diMe5no2carbasalateC

expl CARBON

|             | SAMPLE     | PRESATURATION |          |
|-------------|------------|---------------|----------|
| date        | Jul 5 2014 | satmode       | n        |
| solvent     | cd3od      | wet           | n        |
| file        | exp        | SPECIAL       |          |
| ACQUISITION |            | temp          | not used |
| sw          | 25510.2    | gain          | 30       |
| at          | 1.285      | spin          | not used |
| np          | 65536      | hst           | 0.008    |
| fb          | 17000      | pw90          | 9.800    |
| bs          | 4          | alfa          | 10.000   |
| d1          | 1.000      | FLAGS         |          |
| nt          | 100000     | il            | n        |
| ct          | 4760       | in            | n        |
| TRANSMITTER |            | dp            | y        |
| tn          | C13        | hs            | nn       |
| sfrq        | 100.532    | PROCESSING    |          |
| tof         | 1530.7     | lb            | 3.00     |
| tpwr        | 60         | fn            | not used |
| pw          | 4.900      | sp            | -0.6     |
| DECOUPLER   |            | wp            | 22114.3  |
| dn          | H1         | rfl           | 1697.8   |
| dof         | 0          | rpf           | 0        |
| dm          | yyy        | rp            | -94.9    |
| decwave     | W          | lp            | -4.5     |
| dpwr        | 41         | PLOT          |          |
| dmf         | 10695      | wc            | 250      |
|             |            | sc            | 0        |
|             |            | vs            | 400      |
|             |            | th            | 5        |
|             |            | nm            | cdc ph   |

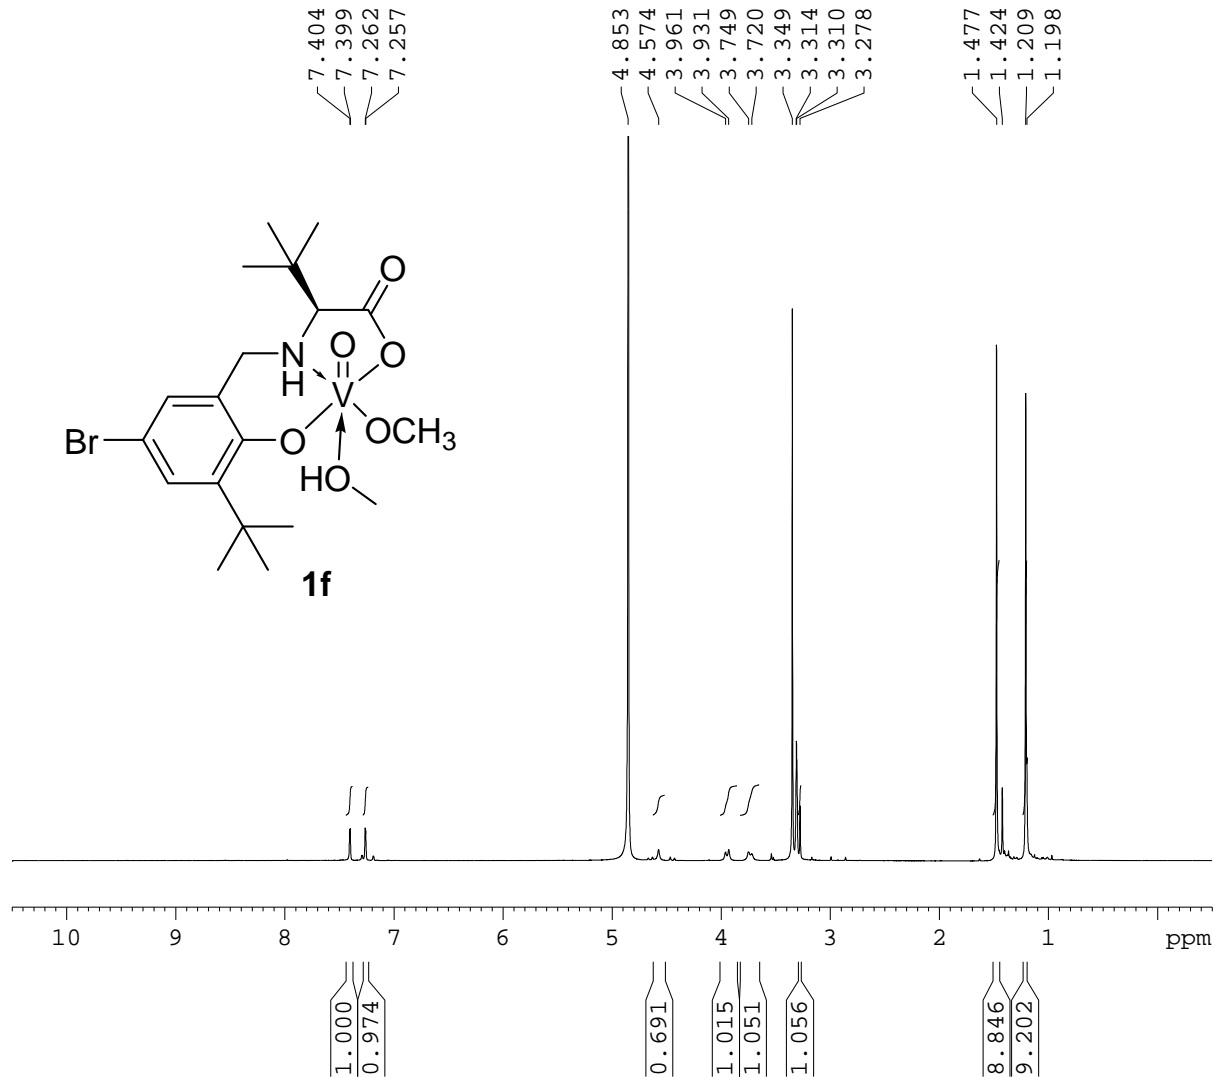

3tbu5brreducedH

expl1 PROTON

| SAMPLE      |             | PRESATURATION |          |
|-------------|-------------|---------------|----------|
| date        | Jun 26 2014 | satmode       | n        |
| solvent     | cd3od       | wet           | n        |
| file        | exp         | SPECIAL       |          |
| ACQUISITION |             | temp          |          |
| sw          | 6410.3      | gain          | not used |
| at          | 2.556       | spin          | not used |
| np          | 32768       | hst           | 0.008    |
| fb          | 4000        | pw90          | 14.000   |
| bs          | 4           | alfa          | 10.000   |
| d1          | 1.000       | FLAGS         |          |
| nt          | 1000        | il            | n        |
| ct          | 64          | in            | n        |
| TRANSMITTER |             | dp            |          |
| tn          | H1          | hs            | nn       |
| sfrq        | 399.766     | PROCESSING    |          |
| tof         | 399.7       | fn            | not used |
| tpwr        | 61          | DISPLAY       |          |
| pw          | 7.000       | sp            | -160.4   |
| DECOUPLER   |             | wp            | 3837.4   |
| dn          | C13         | rfl           | 2121.0   |
| dof         | 0           | rpf           | 1323.2   |
| dm          | nnn         | rp            | -158.1   |
| decwave     | W40_atb     | lp            | 0        |
| dpwr        | 39          | PLOT          |          |
| dmf         | 29412       | wc            | 215      |
|             |             | sc            | 35       |
|             |             | vs            | 500      |
|             |             | th            | 5        |
|             |             | ai            | cdc ph   |

36

exp33 PHOSPHORUS

| SAMPLE      |             | PRESATURATION |          |
|-------------|-------------|---------------|----------|
| date        | Mar 30 2014 | satmode       | n        |
| solvent     | cd3od       | wet           | n        |
| file        | exp         | SPECIAL       |          |
| ACQUISITION |             | temp          | not used |
| sw          | 227272.7    | gain          | 50       |
| at          | 1.153       | spin          | not used |
| np          | 524288      | hst           | 0.008    |
| fb          | 22400       | pw90          | 9.500    |
| bs          | 4           | alfa          | 10.000   |
| d1          | 1.000       | FLAGS         |          |
| nt          | 1000        | il            | n        |
| ct          | 192         | in            | n        |
| TRANSMITTER |             | dp            | y        |
| tn          | V51         | hs            | nn       |
| sfrq        | 105.096     | PROCESSING    |          |
| tof         | 30123.2     | lb            | 3.00     |
|             |             | fn            | not used |
| tpwr        | 52          | DISPLAY       |          |
| pw          | 4.750       | sp            | -78862.8 |
| DECOUPLER   |             | wp            | 42059.6  |
| dn          | H1          | rfl           | 166678.9 |
| dof         | 0           | rpf           | 0        |
| dm          | nny         | rp            | 125.2    |
| decwave     | W           | lp            | -2861.6  |
| dpwr        | 40          | PLOT          |          |
| dmf         | 8889        | wc            | 250      |
|             |             | sc            | 0        |
|             |             | vs            | 1832     |
|             |             | th            | 8        |
|             |             | ai            | cdc ph   |

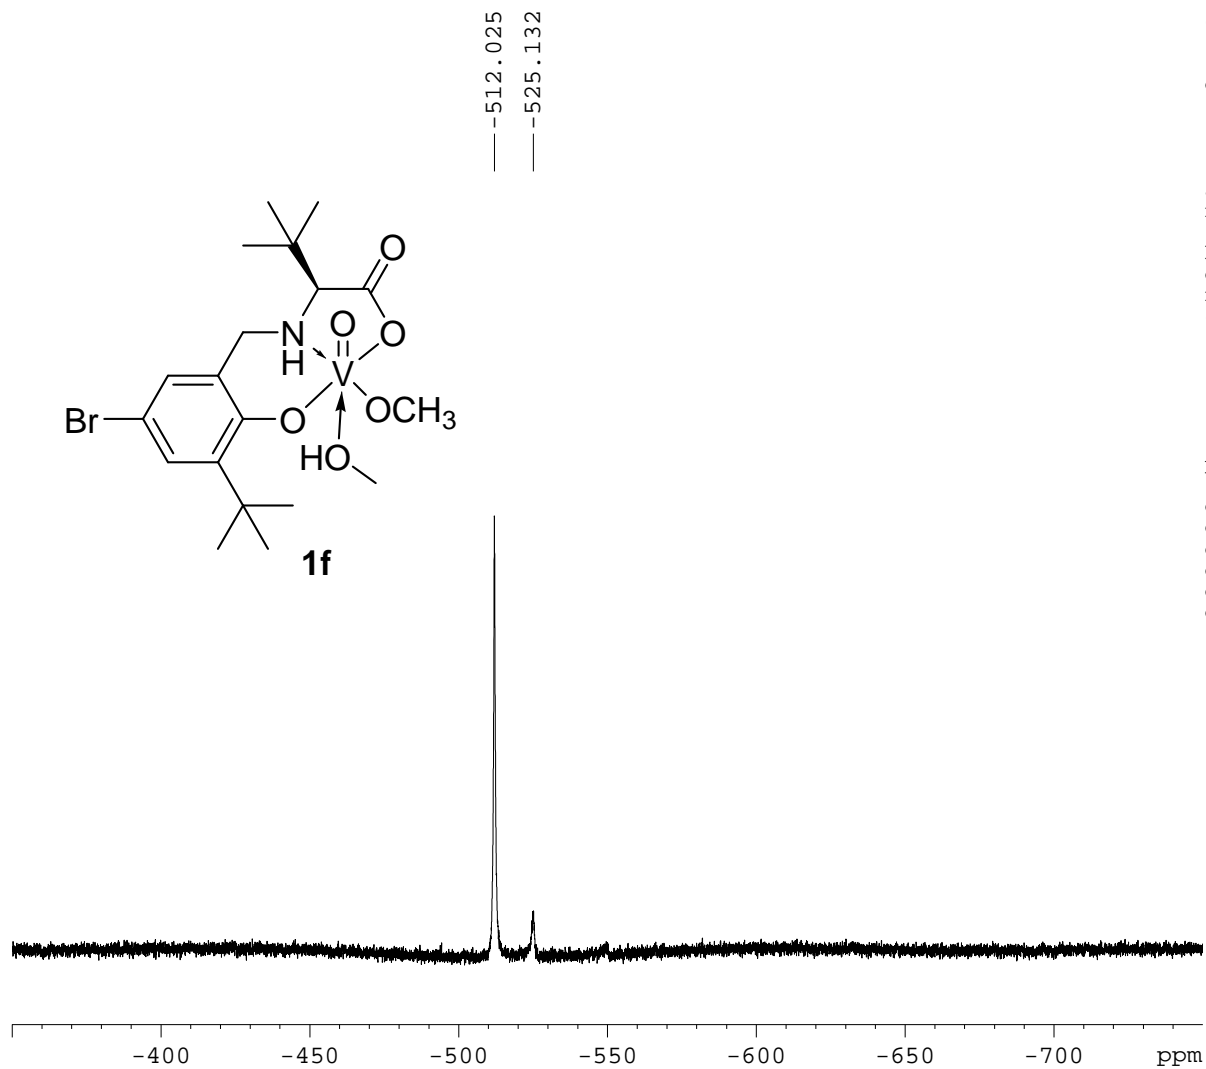



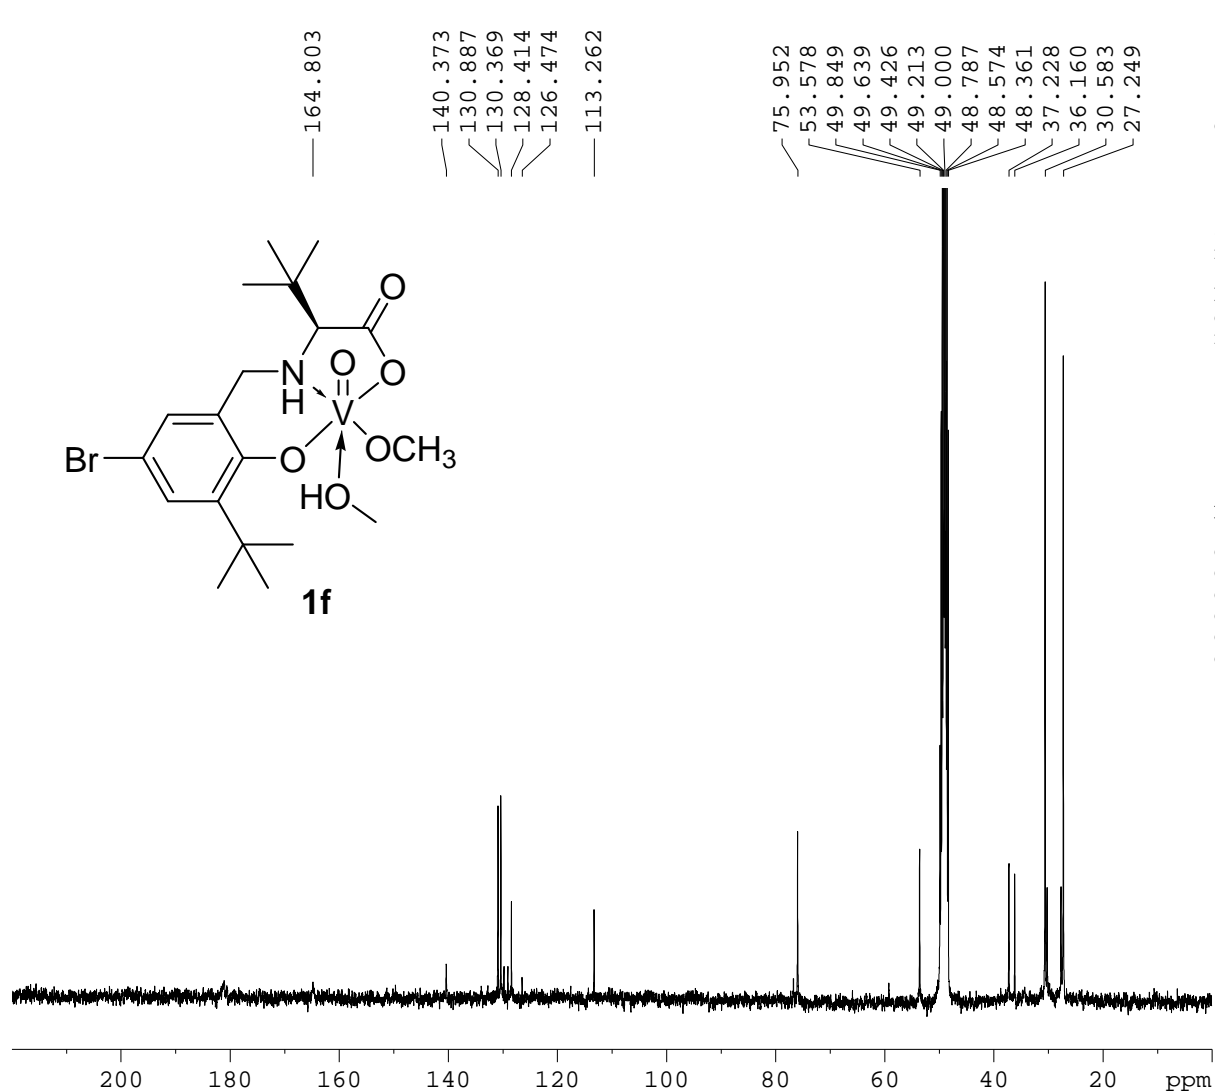

3tbu5brreducedC

exp33 CARBON

| SAMPLE      |             | PRESATURATION |          |
|-------------|-------------|---------------|----------|
| date        | Jun 26 2014 | satmode       | n        |
| solvent     | cd3od       | wet           | n        |
| file        | exp         | SPECIAL       |          |
| ACQUISITION |             | temp          |          |
| sw          | 25510.2     | gain          | not used |
| at          | 1.285       | spin          | 30       |
| np          | 65536       | hst           | not used |
| fb          | 17000       | pw90          | 0.008    |
| bs          | 4           | alfa          | 9.800    |
| bs          | 4           | alfa          | 10.000   |
| d1          | 1.000       | FLAGS         |          |
| nt          | 100000      | il            | n        |
| ct          | 15396       | in            | n        |
| TRANSMITTER |             | dp            |          |
| tn          | C13         | hs            | nn       |
| sfrq        | 100.532     | PROCESSING    |          |
| tof         | 1530.7      | lb            | 3.00     |
| tpwr        | 60          | fn            | not used |
| pw          | 4.900       | DISPLAY       |          |
| dn          | H1          | wp            | 22114.3  |
| dof         | 0           | rfl           | 6478.8   |
| dm          | yyy         | rfp           | 4925.5   |
| decwave     | W           | rp            | -90.0    |
| dpwr        | 41          | lp            | 11.6     |
| dmf         | 10695       | PLOT          |          |
|             |             | wc            | 250      |
|             |             | sc            | 0        |
|             |             | vs            | 2252     |
|             |             | th            | 13       |
|             |             | nm            | cdc ph   |

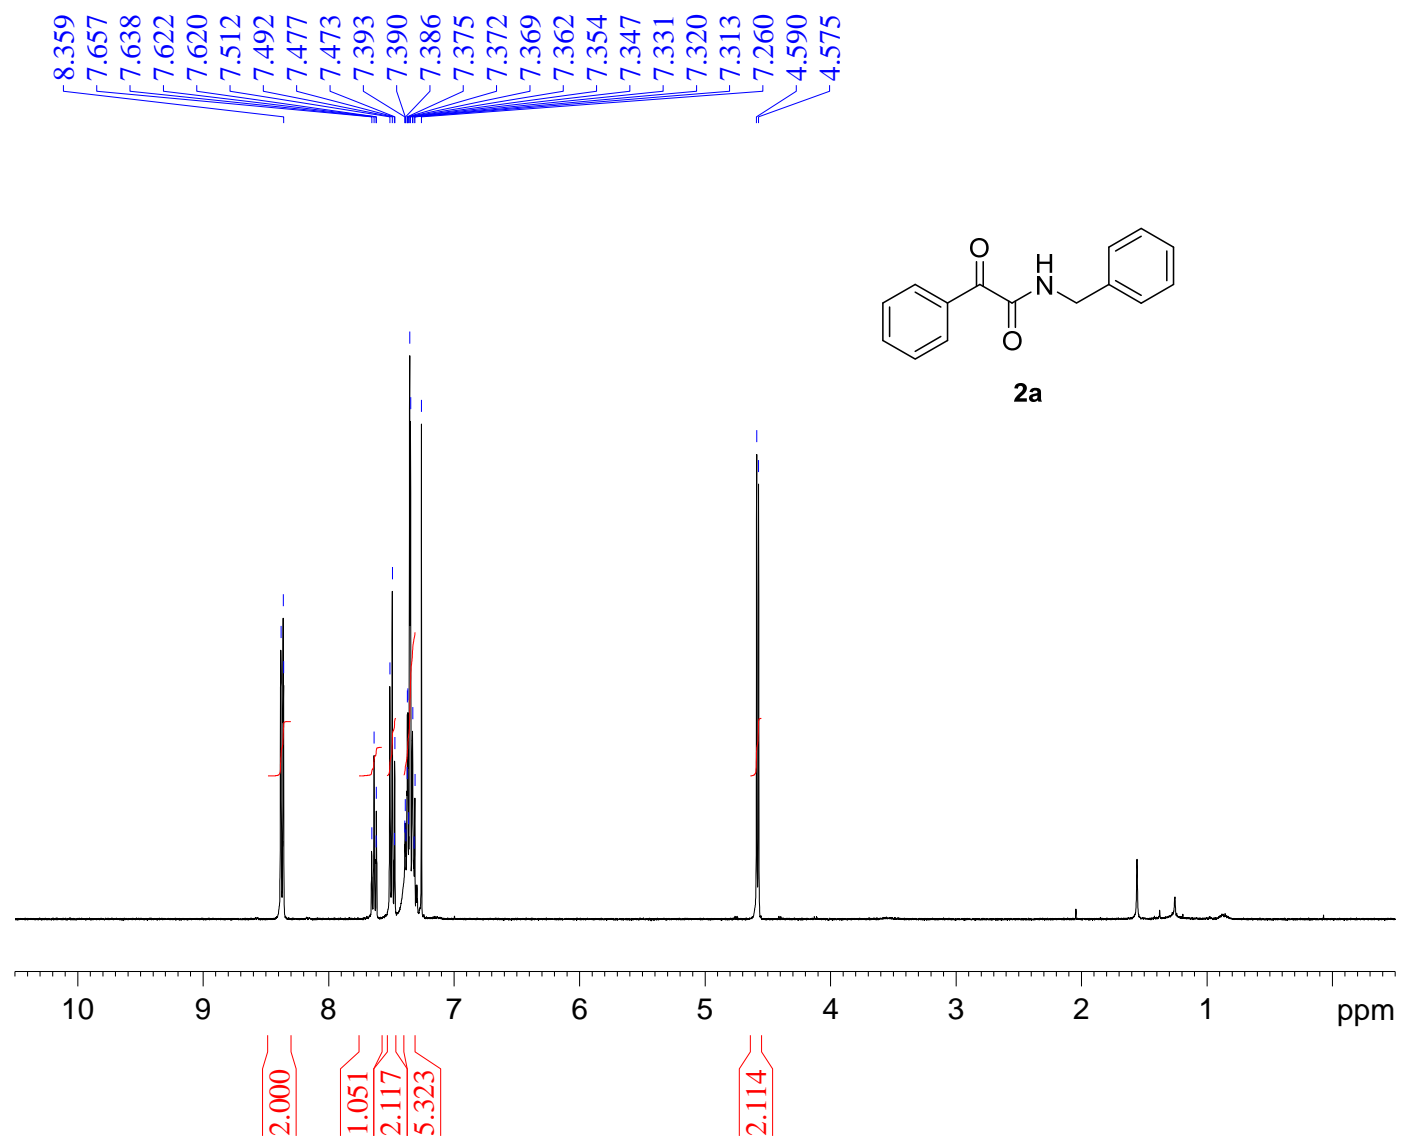

NAME 20141117  
 EXPNO 1  
 PROCNO 1  
 Date\_ 20141117  
 Time 20.10  
 INSTRUM spect  
 PROBHD 5 mm DUL 13C-1  
 PULPROG zg30  
 TD 32768  
 SOLVENT CDCl3  
 NS 44  
 DS 0  
 SWH 6410.256 Hz  
 FIDRES 0.195625 Hz  
 AQ 2.5559540 sec  
 RG 4  
 DW 78.000 usec  
 DE 6.00 usec  
 TE 300.0 K  
 D1 2.00000000 sec  
 TD0 1

===== CHANNEL f1 =====  
 NUC1 1H  
 P1 10.00 usec  
 PL1 -2.40 dB  
 SFO1 400.1528010 MHz  
 SI 16384  
 SF 400.1500092 MHz  
 WDW EM  
 SSB 0  
 LB 0.00 Hz  
 GB 0  
 PC 1.00

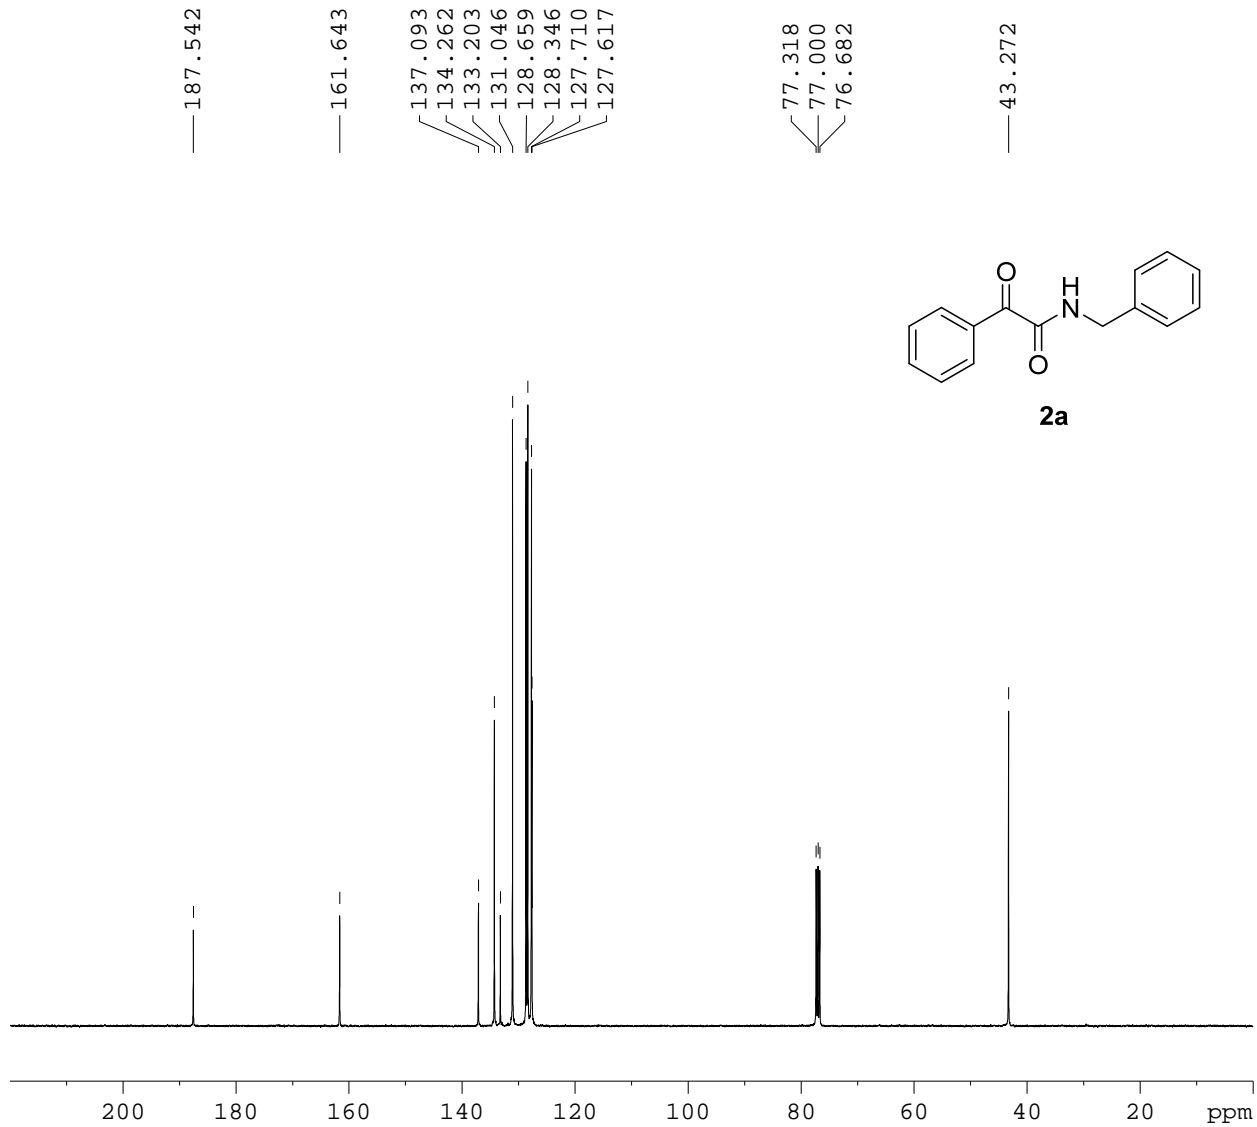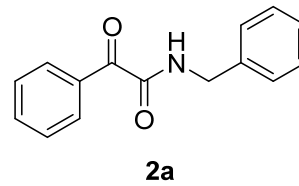

```

NAME          13C
EXPNO         2
PROCNO        1
Date_         20150110
Time          19.41
INSTRUM       spect
PROBHD        5 mm DUL 13C-1
PULPROG       zgpg30
TD            65536
SOLVENT       CDC13
NS            1363
DS            0
SWH           22727.273 Hz
FIDRES        0.346791 Hz
AQ            1.4418420 sec
RG            57
DW            22.000 usec
DE            6.00 usec
TE            300.0 K
D1            2.00000000 sec
d11           0.03000000 sec
DELTA         1.89999998 sec
TD0           1

```

```

===== CHANNEL f1 =====
NUC1          13C
P1            9.70 usec
PL1           -0.50 dB
SFO1          100.6288660 MHz

```

```

===== CHANNEL f2 =====
CPDPRG2       waltz16
NUC2          1H
PCPD2         90.00 usec
PL2           -2.40 dB
PL12          15.10 dB
PL13          18.10 dB
SFO2          400.1516010 MHz
SI            32768
SF            100.6178159 MHz
WDW           EM
SSB           0
LB            3.00 Hz
GB            0
PC            1.00

```

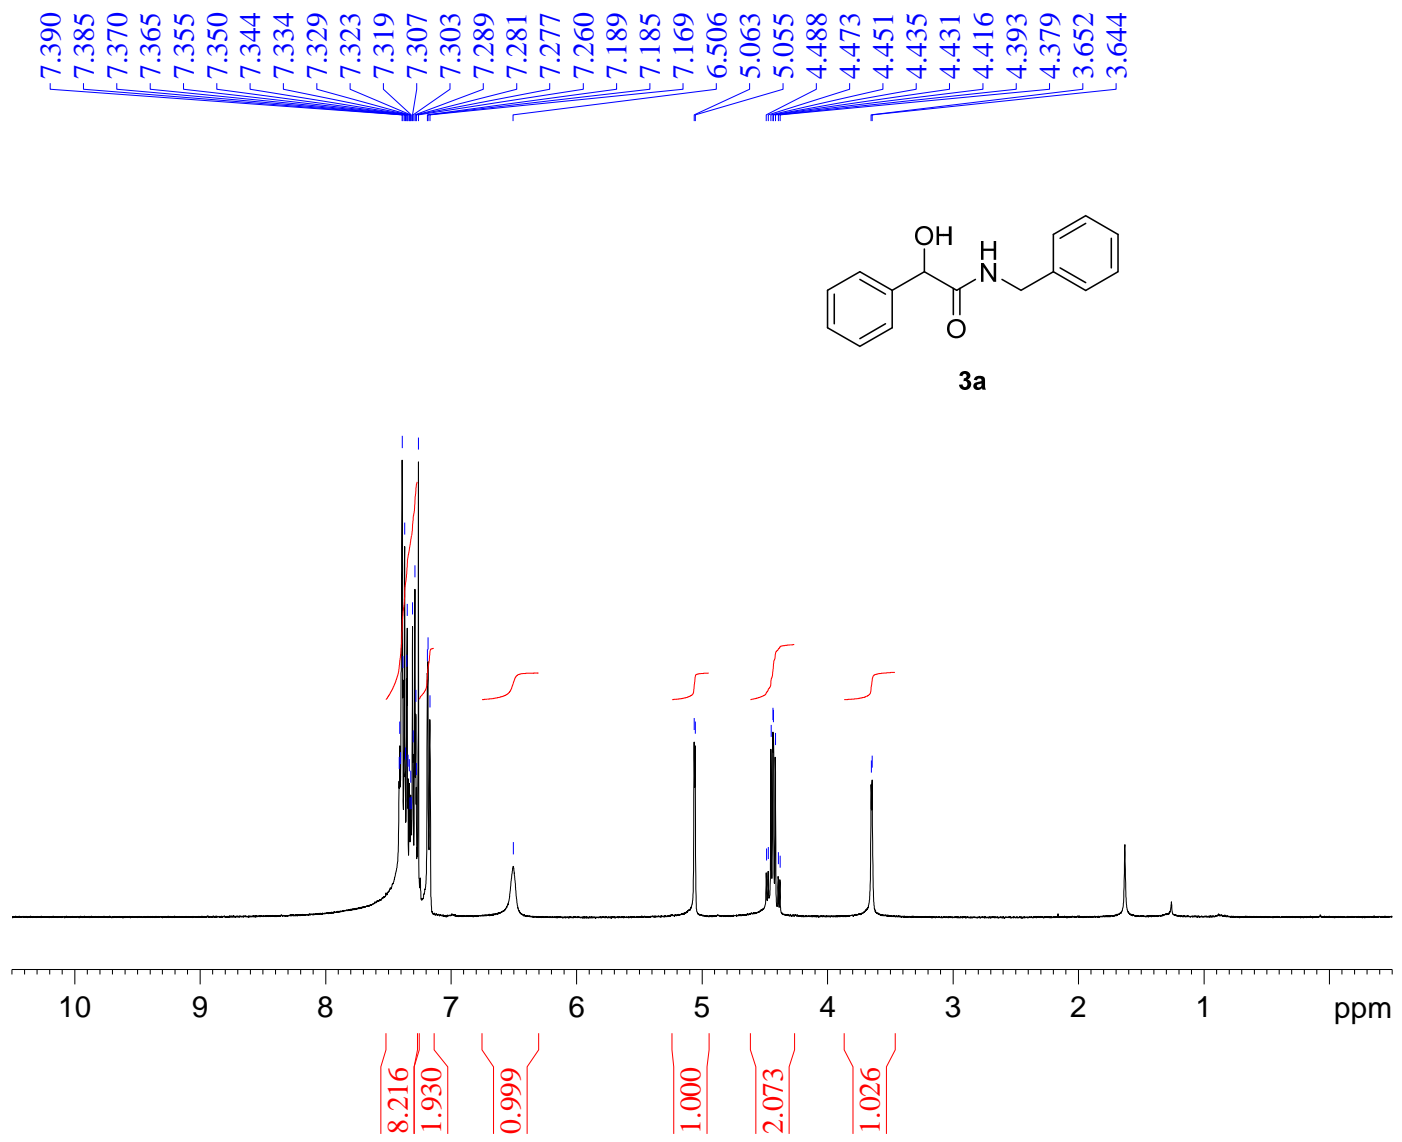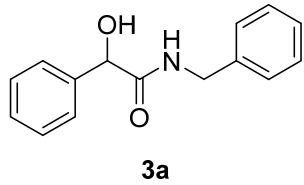

NAME Substrate  
 EXPNO 7  
 PROCNO 1  
 Date\_ 20150702  
 Time 18.27  
 INSTRUM spect  
 PROBHD 5 mm DUL 13C-1  
 PULPROG zg30  
 TD 32768  
 SOLVENT CDCl3  
 NS 48  
 DS 0  
 SWH 6410.256 Hz  
 FIDRES 0.195625 Hz  
 AQ 2.5559540 sec  
 RG 4  
 DW 78.000 usec  
 DE 6.00 usec  
 TE 300.0 K  
 D1 2.00000000 sec  
 TD0 1

===== CHANNEL f1 =====  
 NUC1 1H  
 P1 10.00 usec  
 PL1 -2.40 dB  
 SFO1 400.1528010 MHz  
 SI 16384  
 SF 400.1500088 MHz  
 WDW EM  
 SSB 0  
 LB 0.00 Hz  
 GB 0  
 PC 1.00

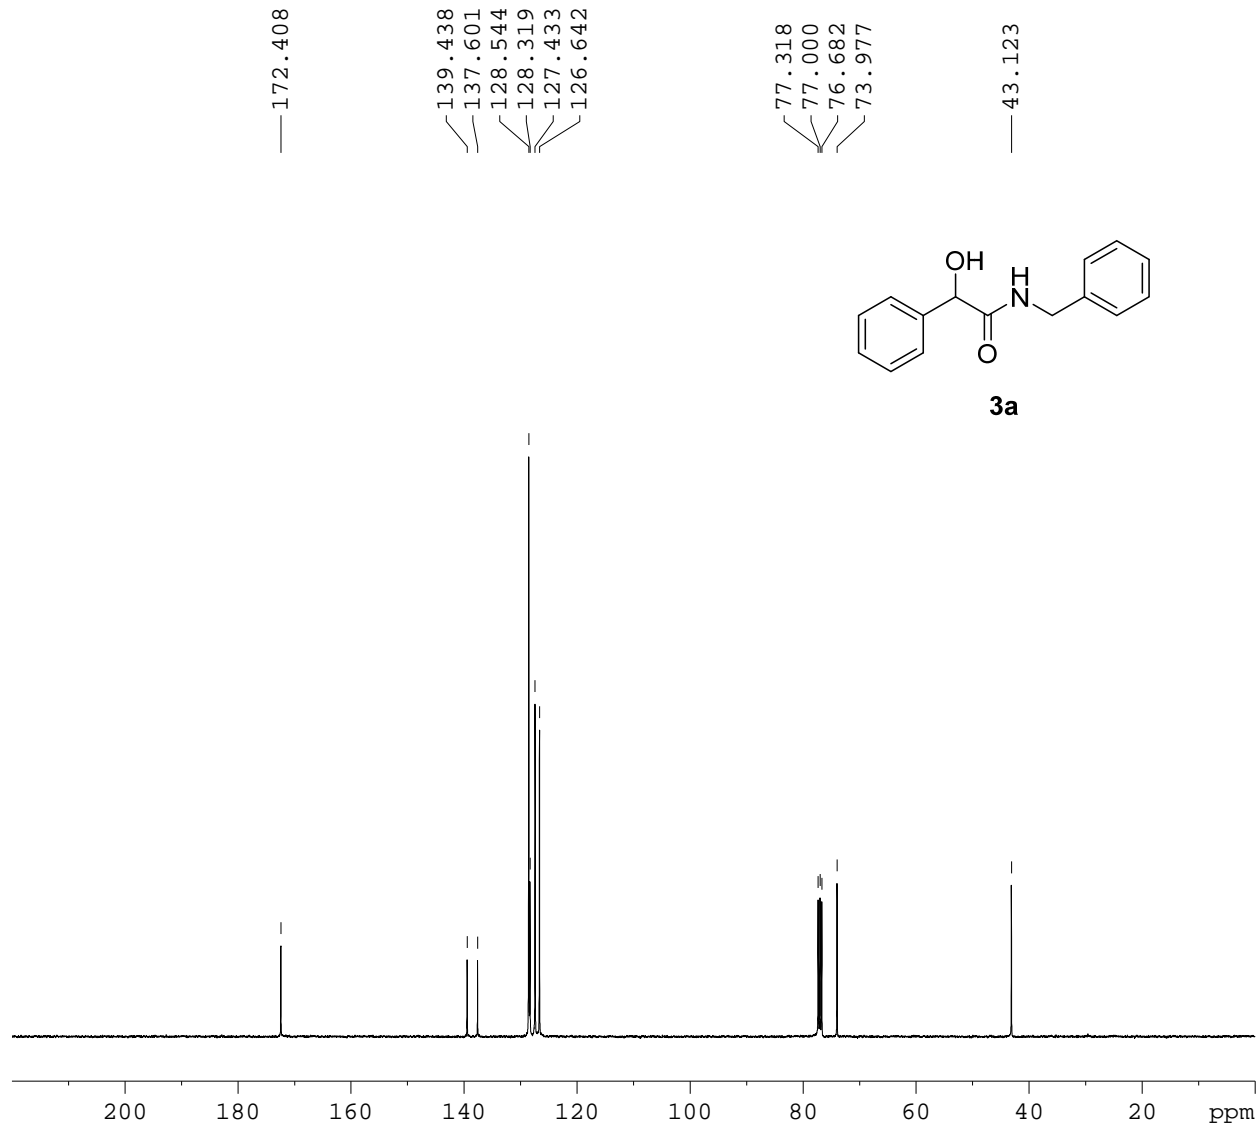

```

NAME          13C
EXPNO         8
PROCNO        1
Date_         20150426
Time          17.01
INSTRUM       spect
PROBHD        5 mm DUL 13C-1
PULPROG       zgpg30
TD            65536
SOLVENT       CDC13
NS            500
DS            0
SWH           22727.273 Hz
FIDRES        0.346791 Hz
AQ            1.4418420 sec
RG            57
DW            22.000 usec
DE            6.00 usec
TE            300.0 K
D1            2.00000000 sec
d11           0.03000000 sec
DELTA         1.89999998 sec
TD0           1

```

```

===== CHANNEL f1 =====
NUC1          13C
P1            9.70 usec
PL1           -0.50 dB
SFO1         100.6288660 MHz

```

```

===== CHANNEL f2 =====
CPDPRG2       waltz16
NUC2          1H
PCPD2         90.00 usec
PL2           -2.40 dB
PL12          15.10 dB
PL13          18.10 dB
SFO2         400.1516010 MHz
SI            32768
SF            100.6178128 MHz
WDW           EM
SSB           0
LB            3.00 Hz
GB            0
PC            1.00

```

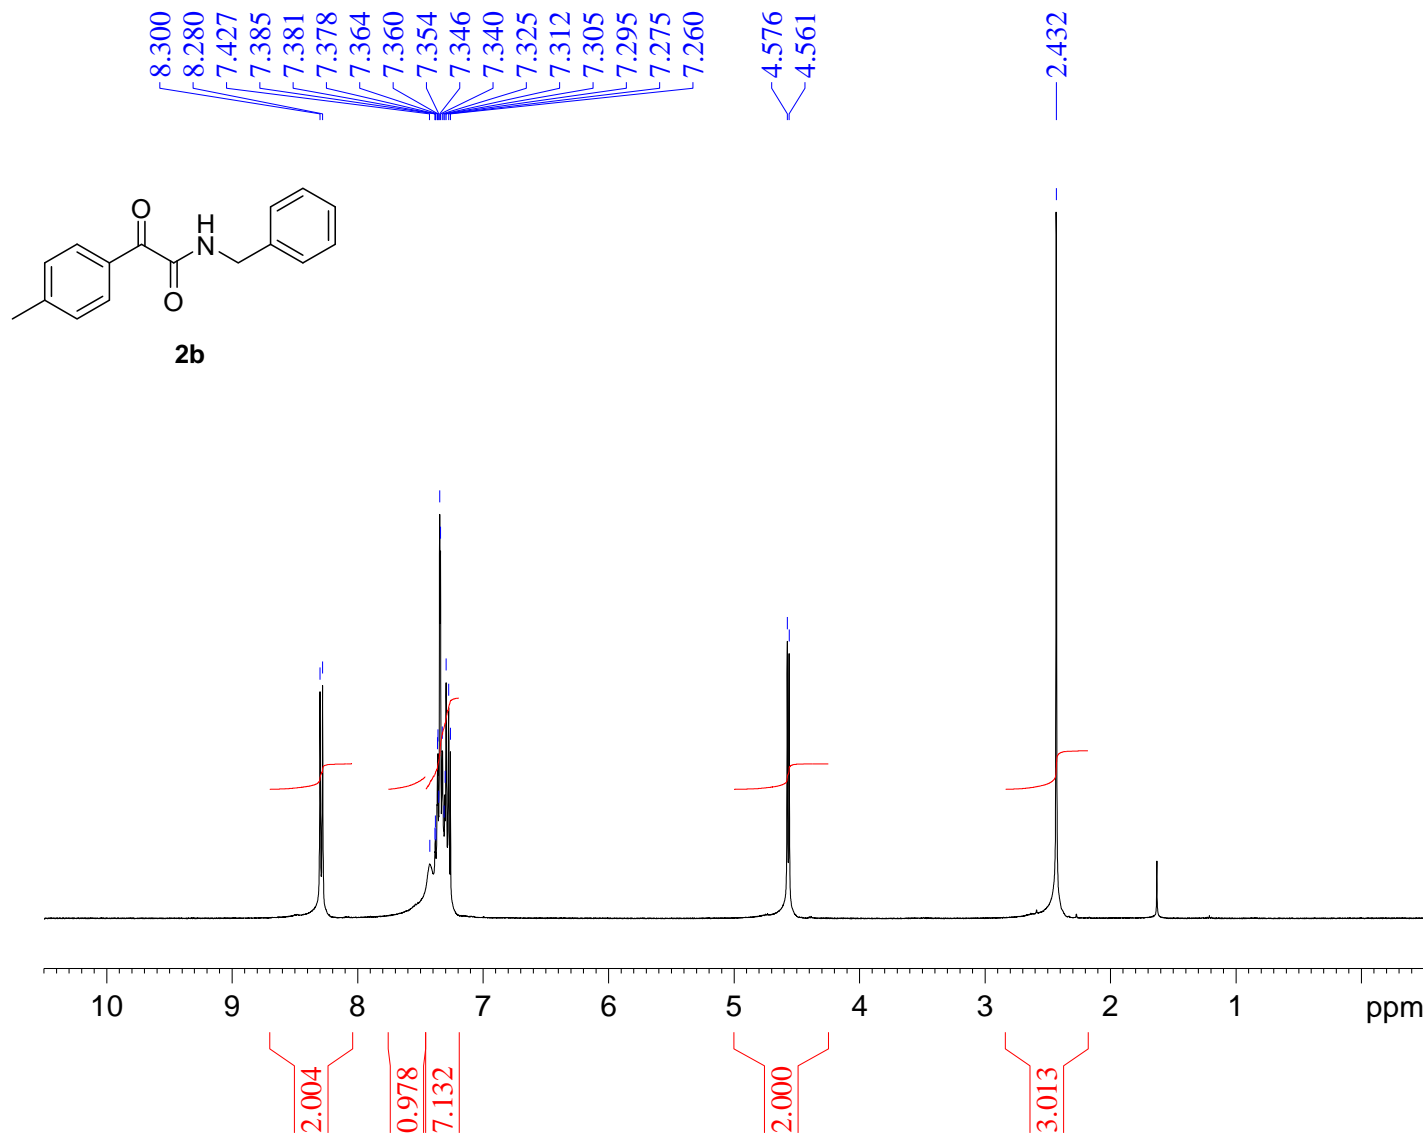

NAME Substrate 1H  
 EXPNO 1  
 PROCNO 1  
 Date\_ 20150503  
 Time 16.45  
 INSTRUM spect  
 PROBHD 5 mm DUL 13C-1  
 PULPROG zg30  
 TD 32768  
 SOLVENT CDCl<sub>3</sub>  
 NS 32  
 DS 0  
 SWH 6410.256 Hz  
 FIDRES 0.195625 Hz  
 AQ 2.5559540 sec  
 RG 4  
 DW 78.000 usec  
 DE 6.00 usec  
 TE 300.0 K  
 D1 2.00000000 sec  
 TD0 1

===== CHANNEL f1 =====  
 NUC1 1H  
 P1 10.00 usec  
 PL1 -2.40 dB  
 SFO1 400.1528010 MHz  
 SI 16384  
 SF 400.1500092 MHz  
 WDW EM  
 SSB 0  
 LB 0.00 Hz  
 GB 0  
 PC 1.00

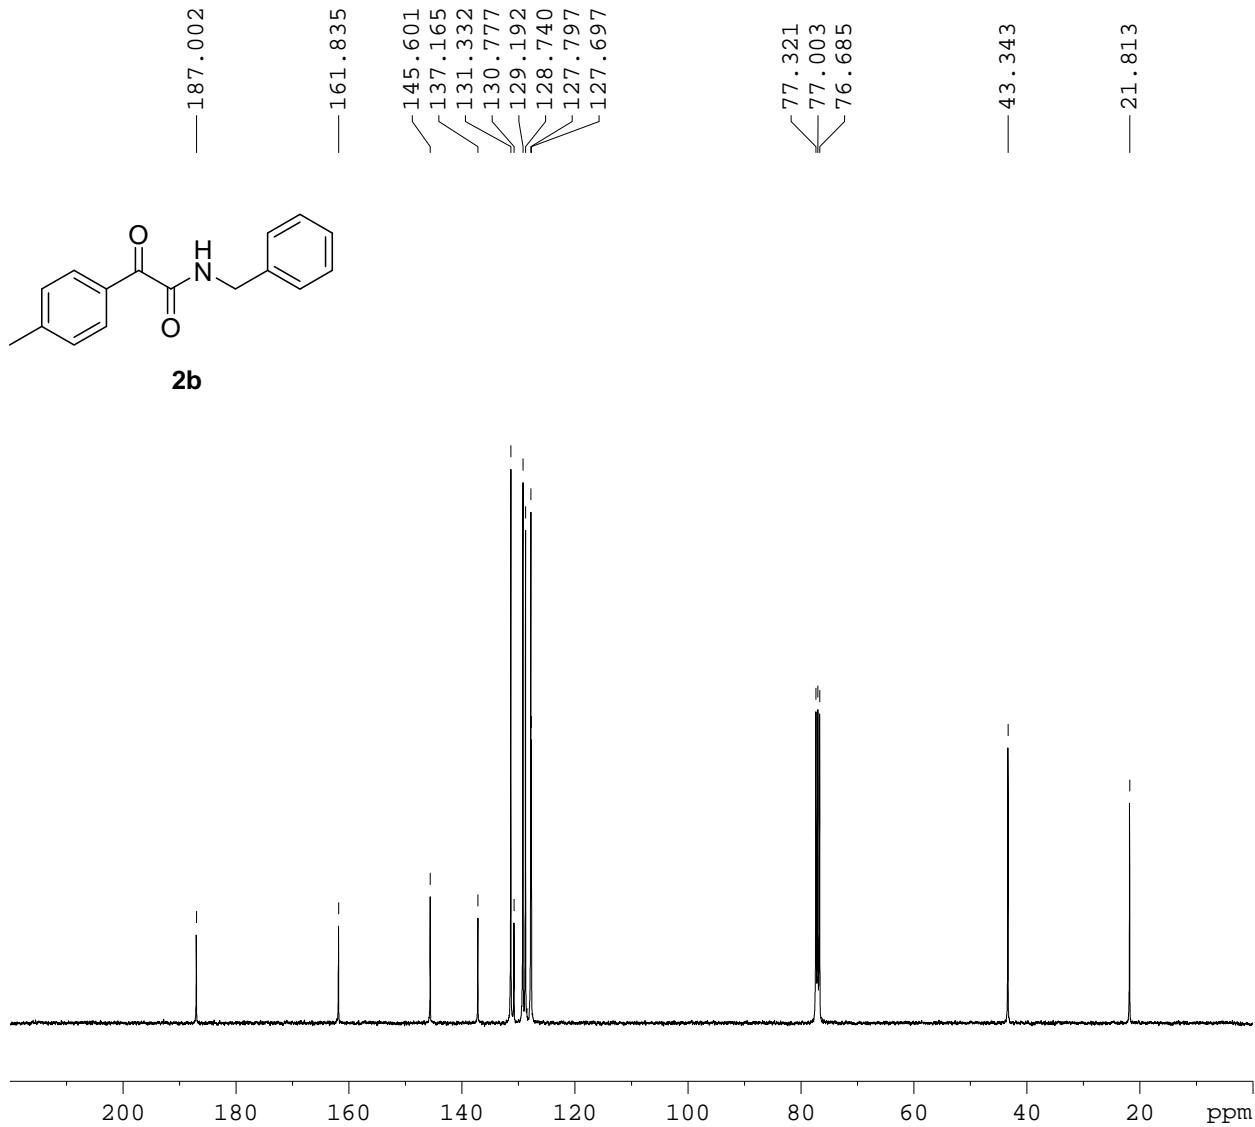

```

NAME      Substrate 13C
EXPNO     1
PROCNO    1
Date_     20150503
Time      16.53
INSTRUM   spect
PROBHD    5 mm DUL 13C-1
PULPROG   zgpg30
TD         65536
SOLVENT   CDC13
NS         1512
DS         0
SWH        22727.273 Hz
FIDRES     0.346791 Hz
AQ         1.4418420 sec
RG         57
DW         22.000 usec
DE         6.00 usec
TE         300.0 K
D1         2.00000000 sec
d11        0.03000000 sec
DELTA     1.89999998 sec
TD0        1

```

```

===== CHANNEL f1 =====
NUC1      13C
P1        9.70 usec
PL1       -0.50 dB
SFO1     100.6288660 MHz

```

```

===== CHANNEL f2 =====
CPDPRG2   waltz16
NUC2      1H
PCPD2     90.00 usec
PL2       -2.40 dB
PL12      15.10 dB
PL13      18.10 dB
SFO2     400.1516010 MHz
SI        32768
SF        100.6178076 MHz
WDW       EM
SSB       0
LB        3.00 Hz
GB        0
PC        1.00

```

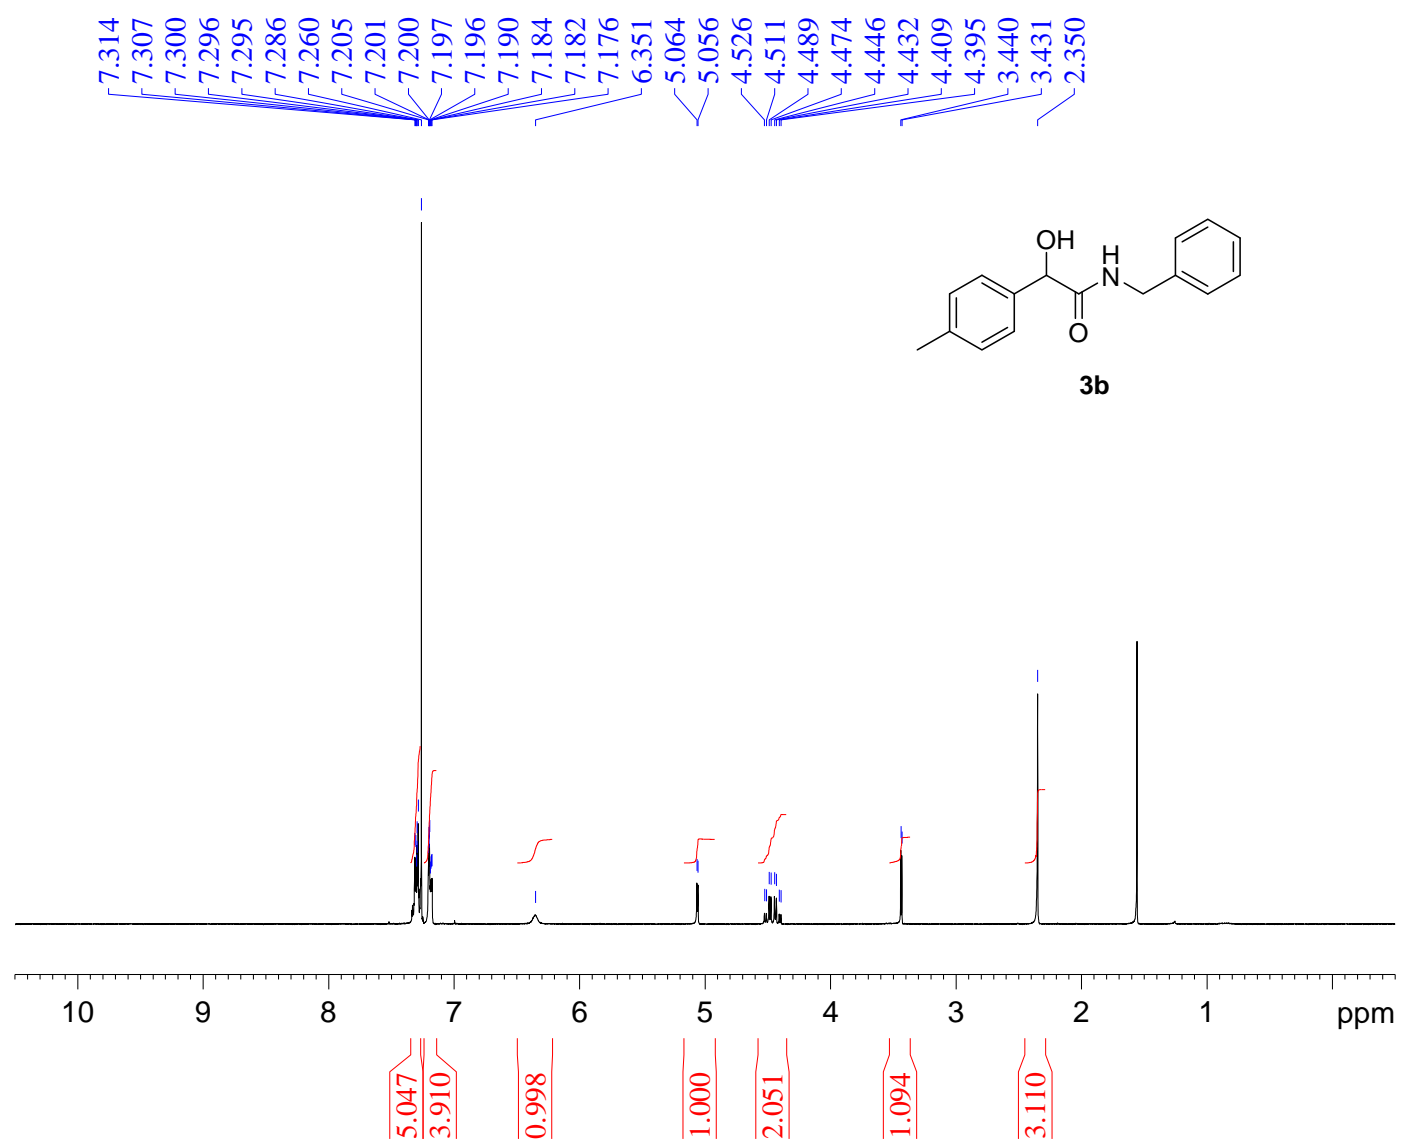

7.314  
7.307  
7.300  
7.296  
7.295  
7.286  
7.260  
7.205  
7.201  
7.200  
7.197  
7.196  
7.190  
7.184  
7.182  
7.176  
6.351  
5.064  
5.056  
4.526  
4.511  
4.489  
4.474  
4.446  
4.432  
4.409  
4.395  
3.440  
3.431  
2.350

NAME 20151029  
EXPNO 1  
PROCNO 1  
Date\_ 20151029  
Time 13.48  
INSTRUM spect  
PROBHD 5 mm DUL 13C-1  
PULPROG zg30  
TD 32768  
SOLVENT CDCl3  
NS 36  
DS 0  
SWH 6410.256 Hz  
FIDRES 0.195625 Hz  
AQ 2.5559540 sec  
RG 4  
DW 78.000 usec  
DE 6.00 usec  
TE 300.0 K  
D1 2.00000000 sec  
TD0 1

===== CHANNEL f1 =====  
NUC1 1H  
P1 10.00 usec  
PL1 -2.40 dB  
SFO1 400.1528010 MHz  
SI 16384  
SF 400.1500088 MHz  
WDW EM  
SSB 0  
LB 0.00 Hz  
GB 0  
PC 1.00



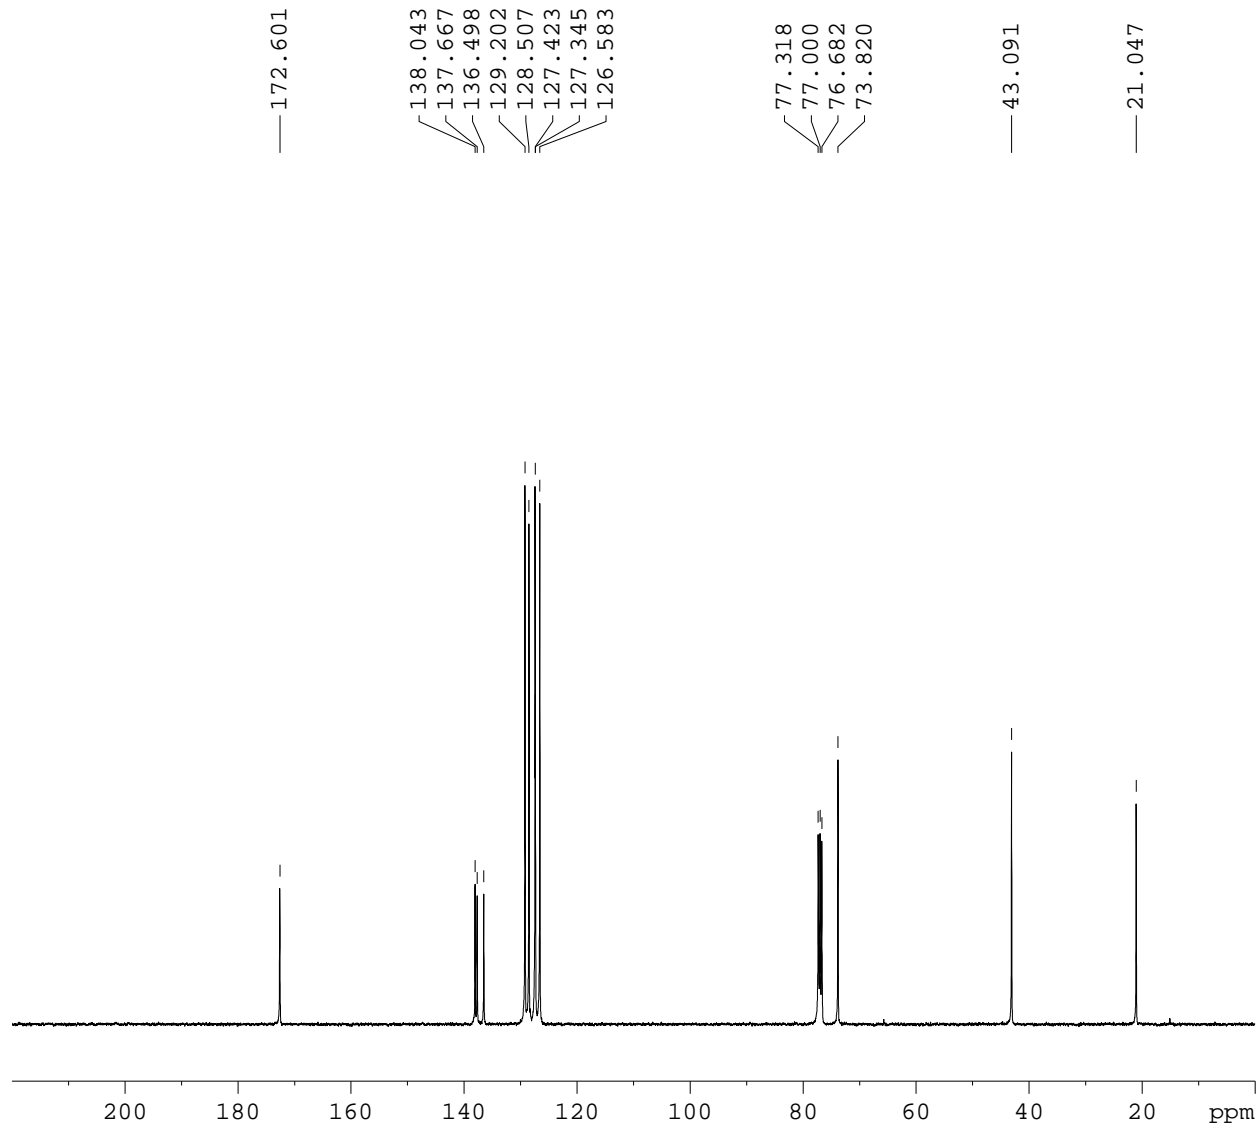

```

NAME          13C
EXPNO         6
PROCNO        1
Date_         20150321
Time          17.40
INSTRUM       spect
PROBHD        5 mm DUL 13C-1
PULPROG       zgpg30
TD            65536
SOLVENT       CDC13
NS            1520
DS            0
SWH           22727.273 Hz
FIDRES        0.346791 Hz
AQ            1.4418420 sec
RG            57
DW            22.000 usec
DE            6.00 usec
TE            300.0 K
D1            2.00000000 sec
d11           0.03000000 sec
DELTA         1.89999998 sec
TD0           1

```

```

===== CHANNEL f1 =====
NUC1          13C
P1            9.70 usec
PL1           -0.50 dB
SFO1         100.6288660 MHz

```

```

===== CHANNEL f2 =====
CPDPRG2      waltz16
NUC2          1H
PCPD2        90.00 usec
PL2           -2.40 dB
PL12         15.10 dB
PL13         18.10 dB
SFO2         400.1516010 MHz
SI            32768
SF           100.6178151 MHz
WDW           EM
SSB           0
LB            3.00 Hz
GB            0
PC            1.00

```

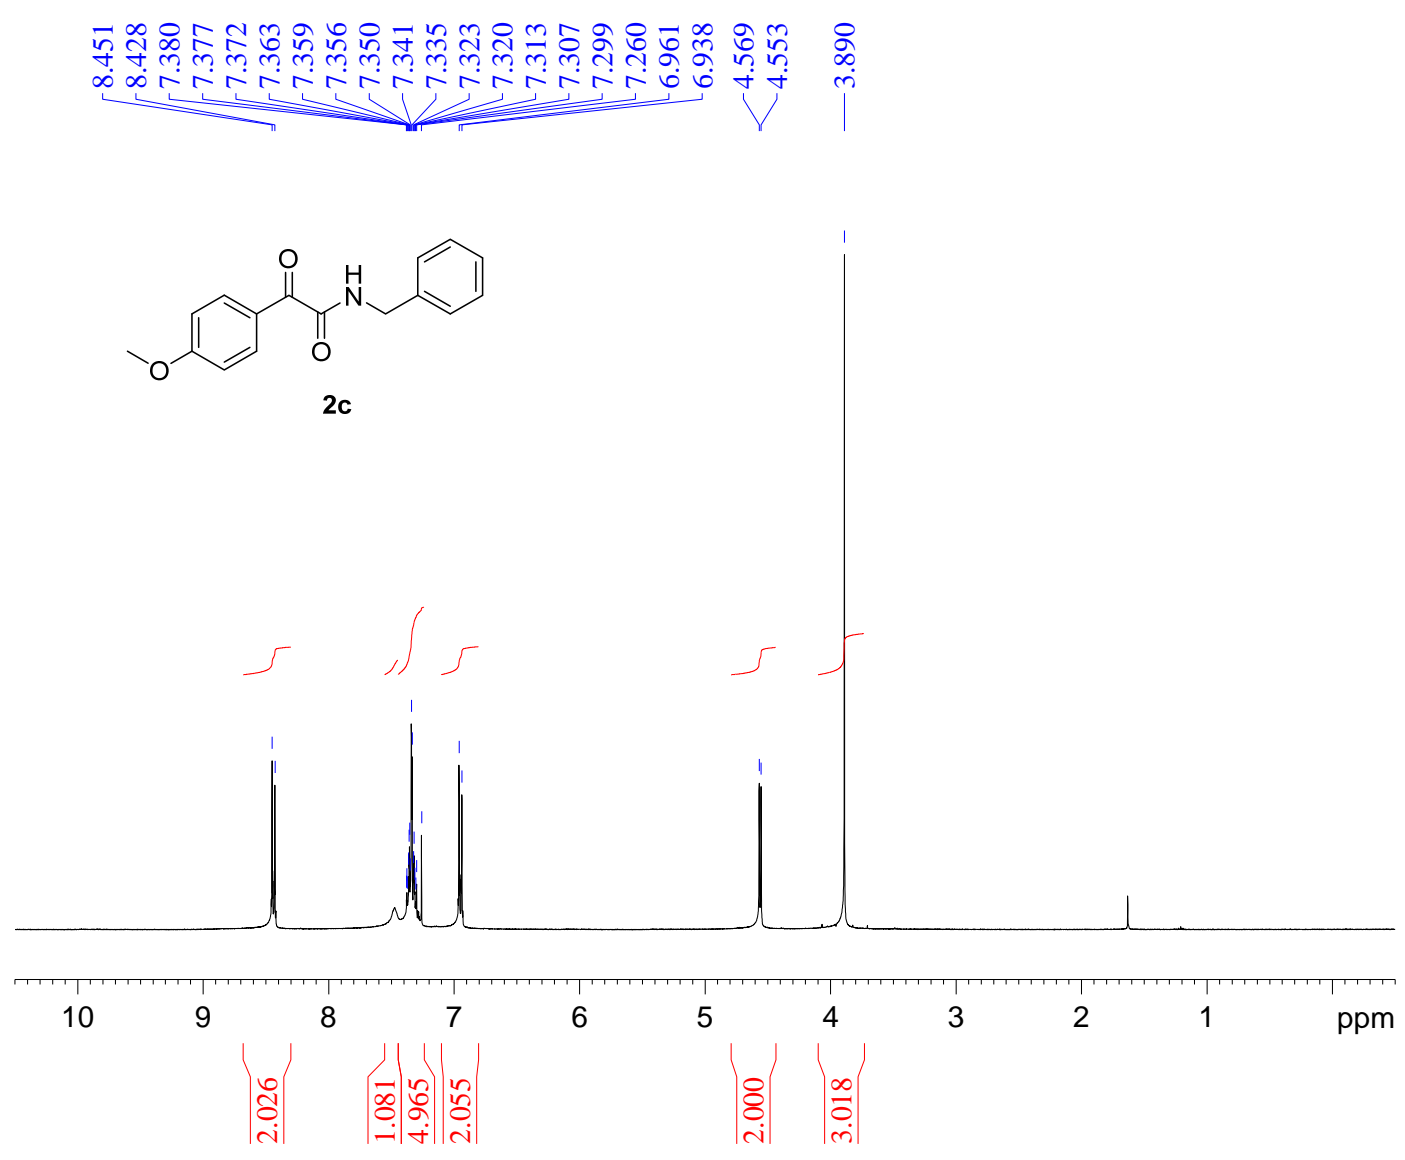

NAME Substrate 1H  
 EXPNO 11  
 PROCNO 1  
 Date\_ 20150719  
 Time 15.26  
 INSTRUM spect  
 PROBHD 5 mm DUL 13C-1  
 PULPROG zg30  
 TD 32768  
 SOLVENT CDCl3  
 NS 20  
 DS 0  
 SWH 6410.256 Hz  
 FIDRES 0.195625 Hz  
 AQ 2.5559540 sec  
 RG 4  
 DW 78.000 usec  
 DE 6.00 usec  
 TE 300.0 K  
 D1 2.00000000 sec  
 TD0 1

===== CHANNEL f1 =====  
 NUC1 1H  
 P1 10.00 usec  
 PL1 -2.40 dB  
 SFO1 400.1528010 MHz  
 SI 16384  
 SF 400.1500088 MHz  
 WDW EM  
 SSB 0  
 LB 0.00 Hz  
 GB 0  
 PC 1.00

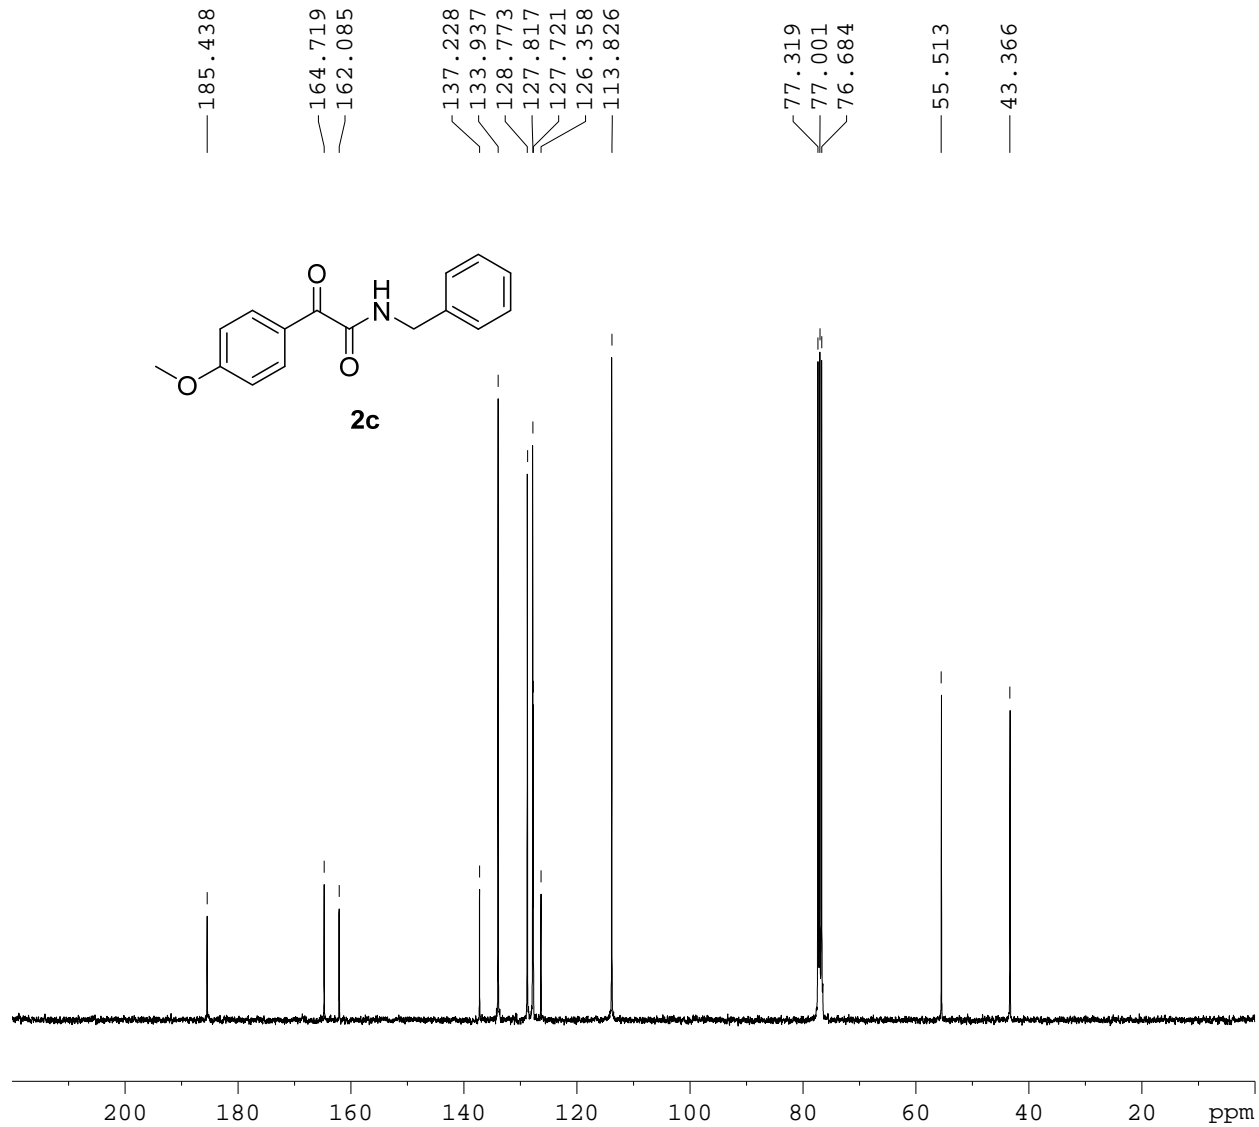

```

NAME      Substrate 13C
EXPNO     11
PROCNO    1
Date_     20150719
Time      15.31
INSTRUM   spect
PROBHD    5 mm DUL 13C-1
PULPROG   zgpg30
TD         65536
SOLVENT   CDC13
NS         1191
DS         0
SWH        22727.273 Hz
FIDRES     0.346791 Hz
AQ         1.4418420 sec
RG         57
DW         22.000 usec
DE         6.00 usec
TE         300.0 K
D1         2.00000000 sec
d11        0.03000000 sec
DELTA     1.89999998 sec
TD0        1

```

```

===== CHANNEL f1 =====
NUC1      13C
P1        9.70 usec
PL1       -0.50 dB
SFO1     100.6288660 MHz

```

```

===== CHANNEL f2 =====
CPDPRG2   waltz16
NUC2      1H
PCPD2     90.00 usec
PL2       -2.40 dB
PL12      15.10 dB
PL13      18.10 dB
SFO2     400.1516010 MHz
SI        32768
SF        100.6178033 MHz
WDW       EM
SSB       0
LB        3.00 Hz
GB        0
PC        1.00

```

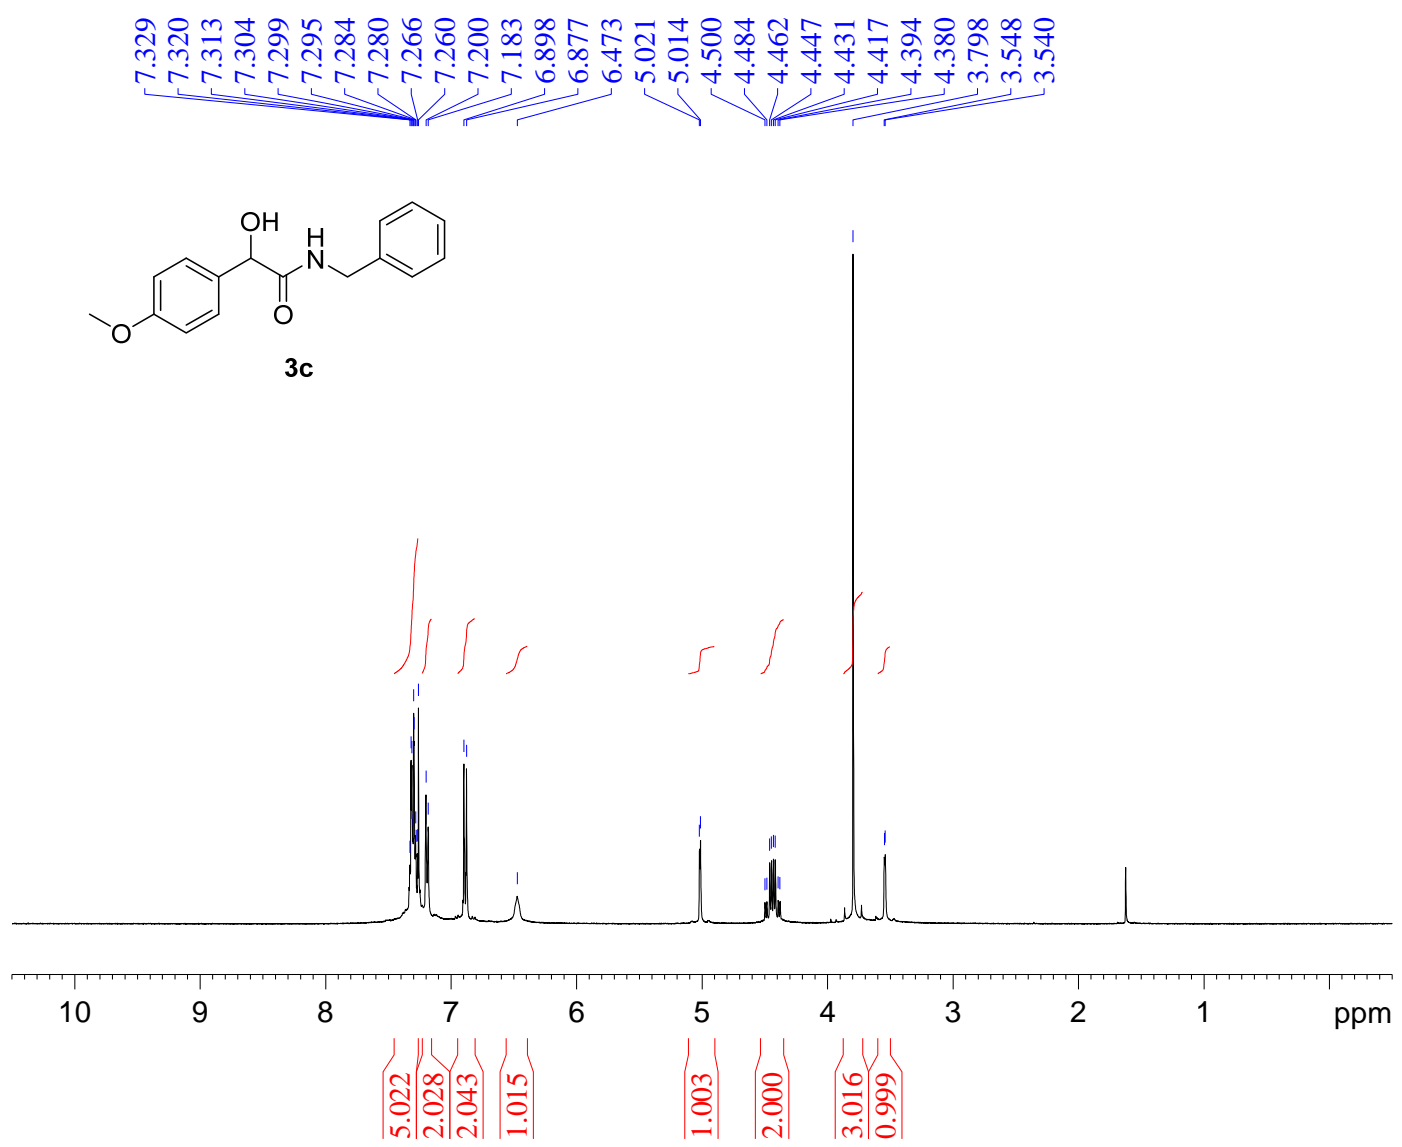

NAME Substrate 1H  
 EXPNO 12  
 PROCNO 1  
 Date\_ 20150720  
 Time 20.11  
 INSTRUM spect  
 PROBHD 5 mm DUL 13C-1  
 PULPROG zg30  
 TD 32768  
 SOLVENT CDCl3  
 NS 32  
 DS 0  
 SWH 6410.256 Hz  
 FIDRES 0.195625 Hz  
 AQ 2.5559540 sec  
 RG 4  
 DW 78.000 usec  
 DE 6.00 usec  
 TE 300.0 K  
 D1 2.00000000 sec  
 TD0 1

===== CHANNEL f1 =====  
 NUC1 1H  
 P1 10.00 usec  
 PL1 -2.40 dB  
 SFO1 400.1528010 MHz  
 SI 16384  
 SF 400.1500092 MHz  
 WDW EM  
 SSB 0  
 LB 0.00 Hz  
 GB 0  
 PC 1.00

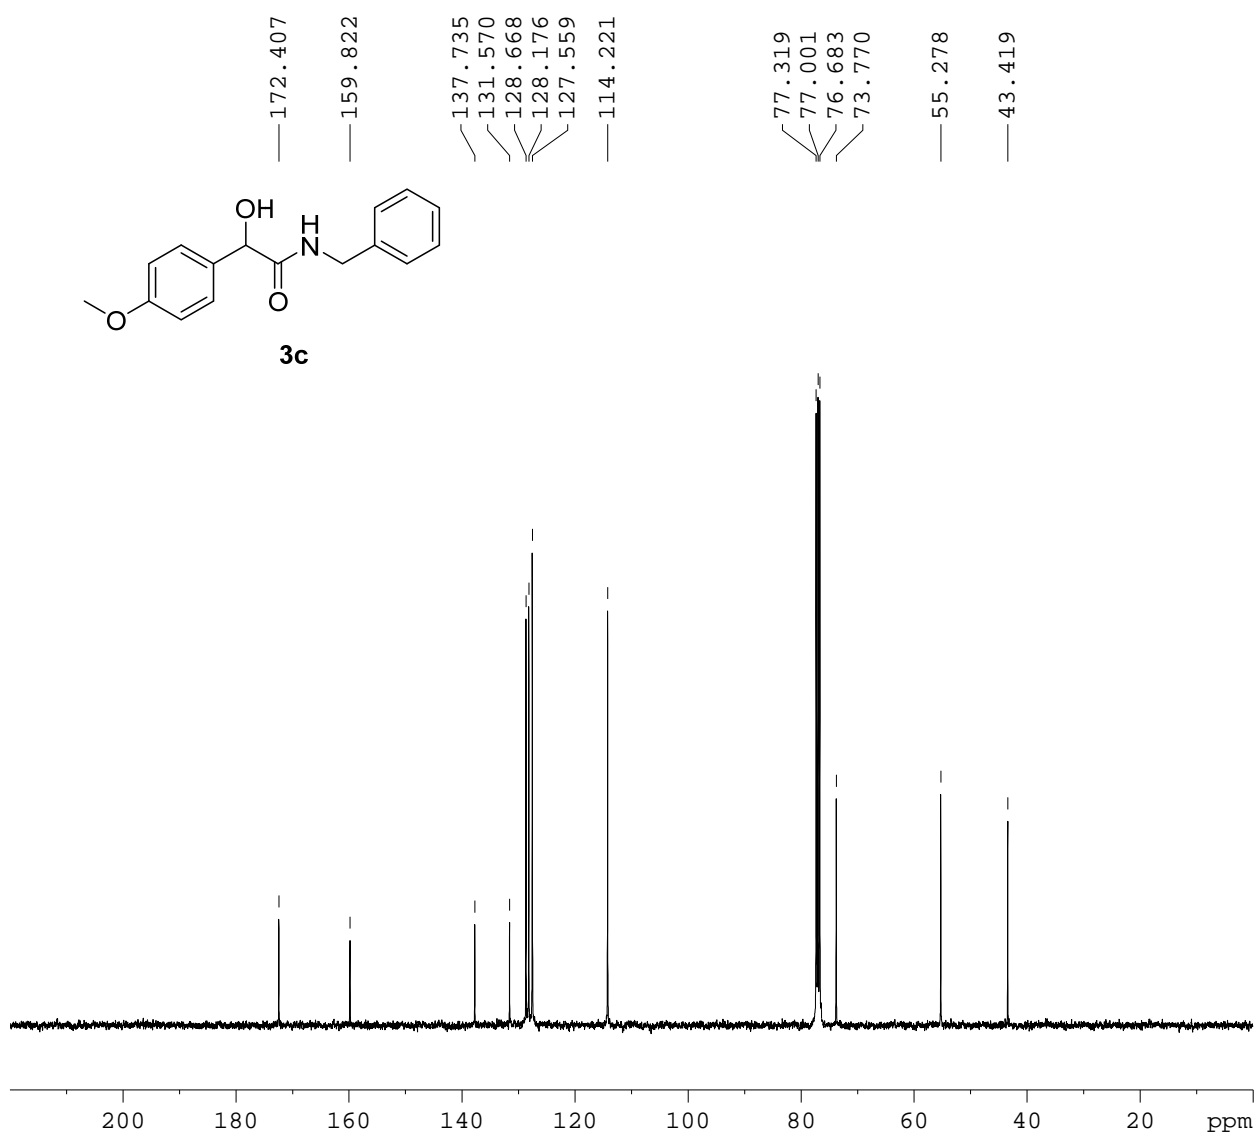

```

NAME      Substrate 13C
EXPNO     12
PROCNO    1
Date_     20150720
Time      20.16
INSTRUM   spect
PROBHD    5 mm DUL 13C-1
PULPROG   zgpg30
TD         65536
SOLVENT   CDC13
NS         734
DS         0
SWH        22727.273 Hz
FIDRES     0.346791 Hz
AQ         1.4418420 sec
RG         57
DW         22.000 usec
DE         6.00 usec
TE         300.0 K
D1         2.00000000 sec
d11        0.03000000 sec
DELTA     1.89999998 sec
TD0        1

```

```

===== CHANNEL f1 =====
NUC1      13C
P1        9.70 usec
PL1       -0.50 dB
SFO1     100.6288660 MHz

```

```

===== CHANNEL f2 =====
CPDPRG2   waltz16
NUC2      1H
PCPD2     90.00 usec
PL2       -2.40 dB
PL12      15.10 dB
PL13      18.10 dB
SFO2     400.1516010 MHz
SI        32768
SF        100.6178029 MHz
WDW       EM
SSB       0
LB        3.00 Hz
GB        0
PC        1.00

```

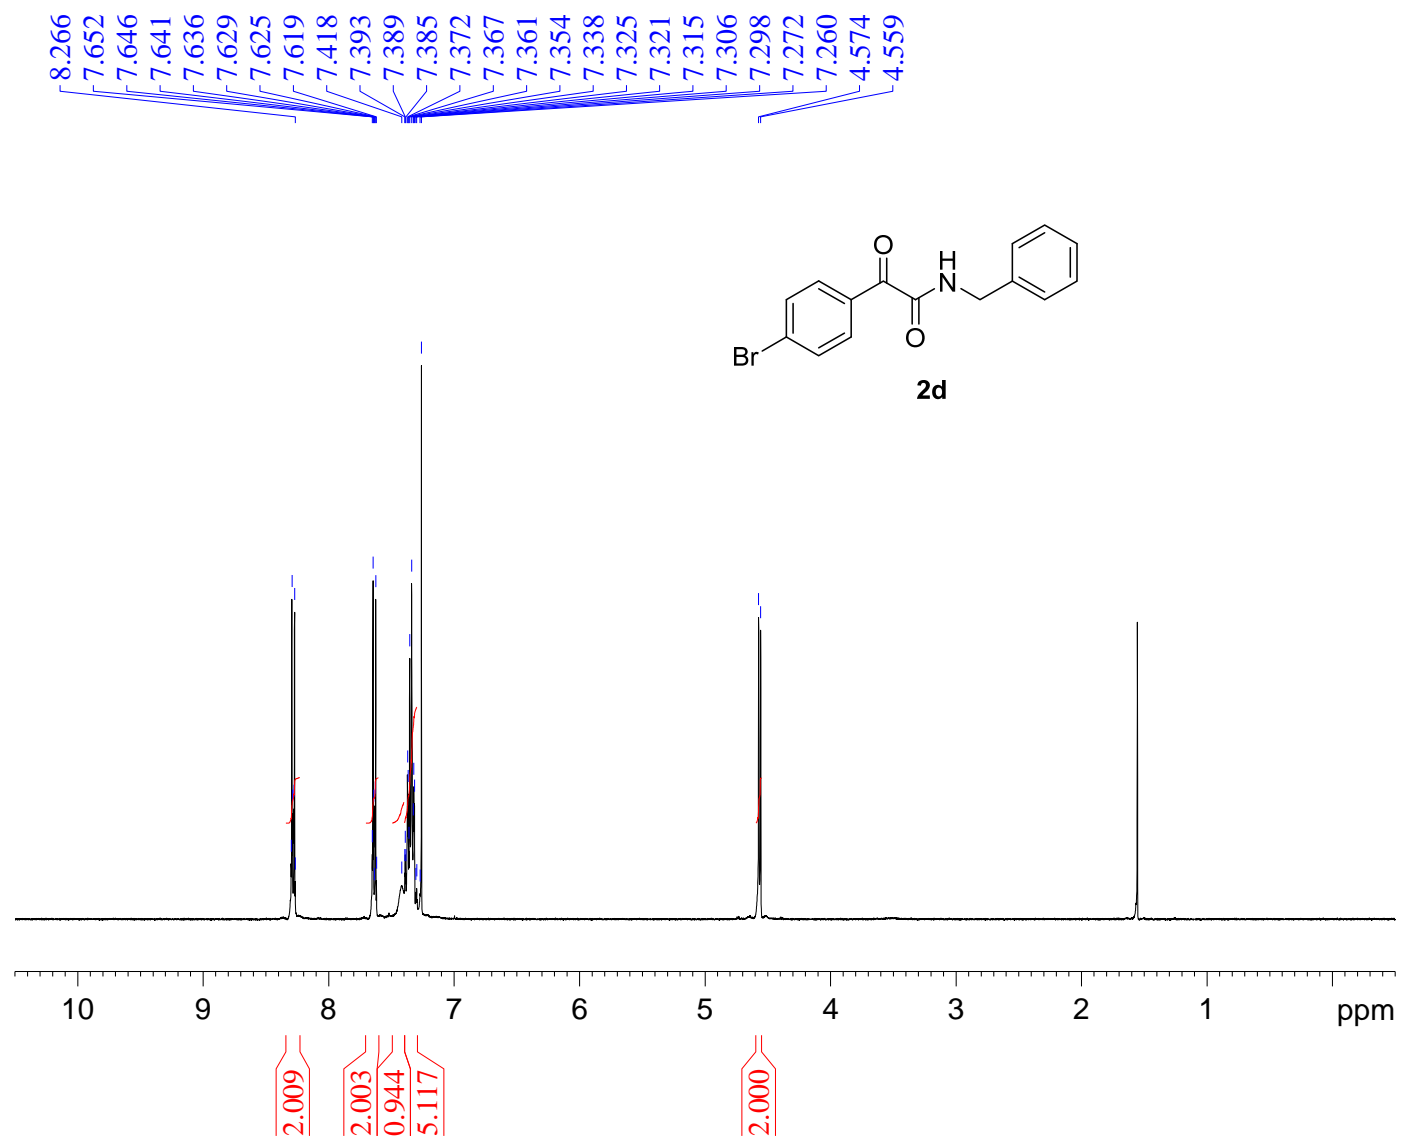

NAME Substrate 1H  
 EXPNO 14  
 PROCNO 1  
 Date\_ 20150723  
 Time 20.25  
 INSTRUM spect  
 PROBHD 5 mm DUL 13C-1  
 PULPROG zg30  
 TD 32768  
 SOLVENT CDCl3  
 NS 44  
 DS 0  
 SWH 6410.256 Hz  
 FIDRES 0.195625 Hz  
 AQ 2.5559540 sec  
 RG 4  
 DW 78.000 usec  
 DE 6.00 usec  
 TE 300.0 K  
 D1 2.00000000 sec  
 TD0 1

===== CHANNEL f1 =====  
 NUC1 1H  
 P1 10.00 usec  
 PL1 -2.40 dB  
 SFO1 400.1528010 MHz  
 SI 16384  
 SF 400.1500088 MHz  
 WDW EM  
 SSB 0  
 LB 0.00 Hz  
 GB 0  
 PC 1.00

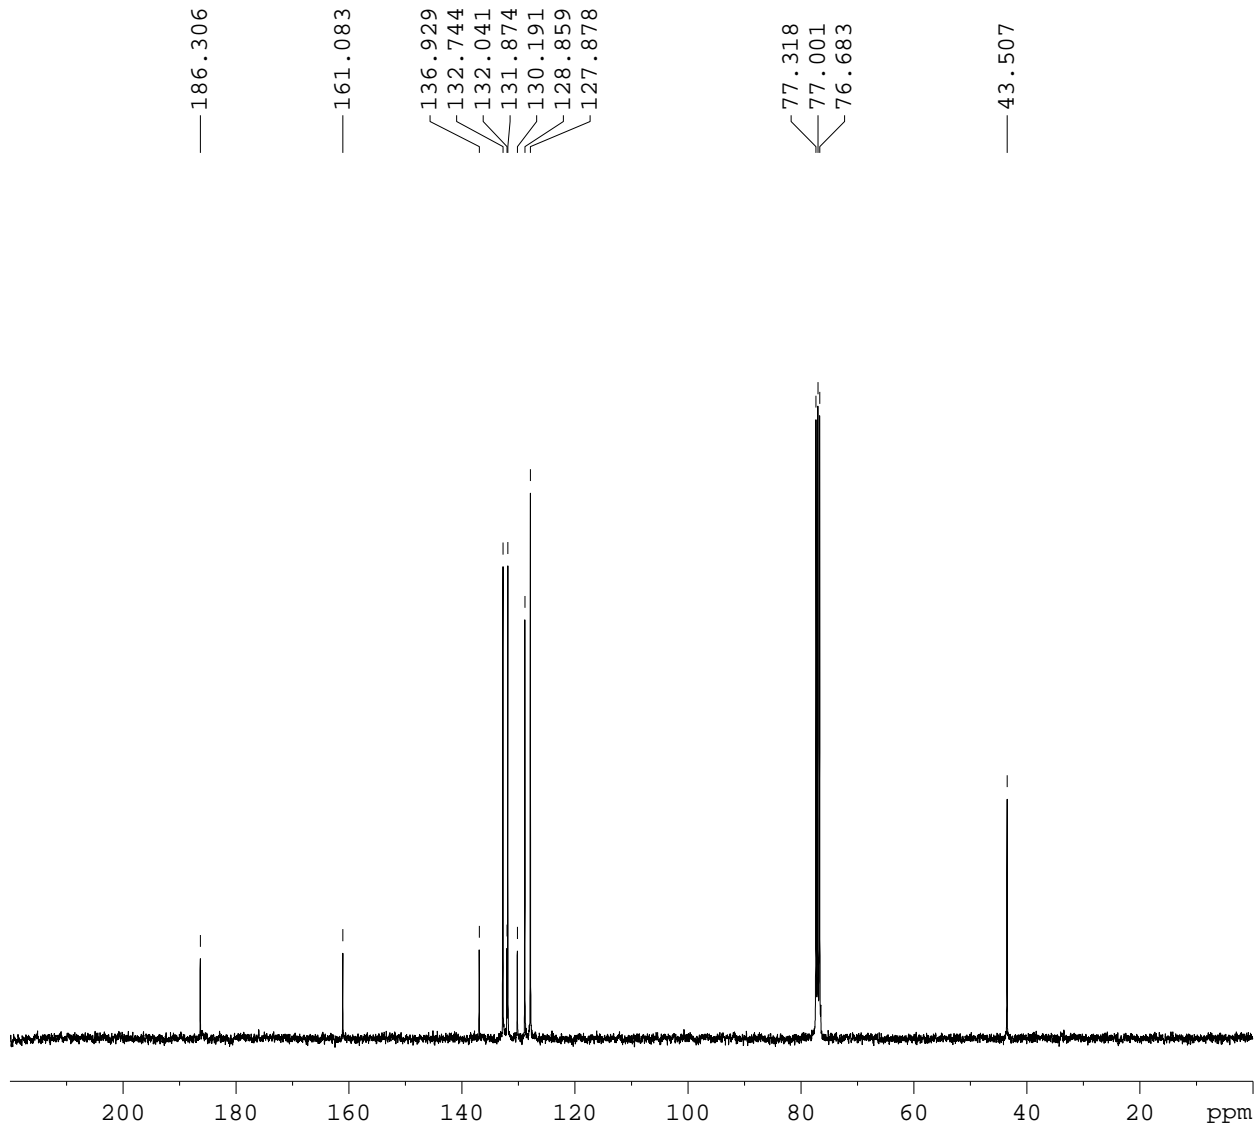

```

NAME      Substrate 13C
EXPNO     14
PROCNO    1
Date_     20150723
Time      20.31
INSTRUM   spect
PROBHD    5 mm DUL 13C-1
PULPROG   zgpg30
TD         65536
SOLVENT   CDC13
NS         496
DS         0
SWH        22727.273 Hz
FIDRES     0.346791 Hz
AQ         1.4418420 sec
RG         57
DW         22.000 usec
DE         6.00 usec
TE         300.0 K
D1         2.00000000 sec
d11        0.03000000 sec
DELTA     1.89999998 sec
TD0        1

```

```

===== CHANNEL f1 =====
NUC1      13C
P1        9.70 usec
PL1       -0.50 dB
SFO1     100.6288660 MHz

```

```

===== CHANNEL f2 =====
CPDPRG2   waltz16
NUC2      1H
PCPD2     90.00 usec
PL2       -2.40 dB
PL12      15.10 dB
PL13      18.10 dB
SFO2     400.1516010 MHz
SI        32768
SF        100.6178020 MHz
WDW       EM
SSB       0
LB        3.00 Hz
GB        0
PC        1.00

```

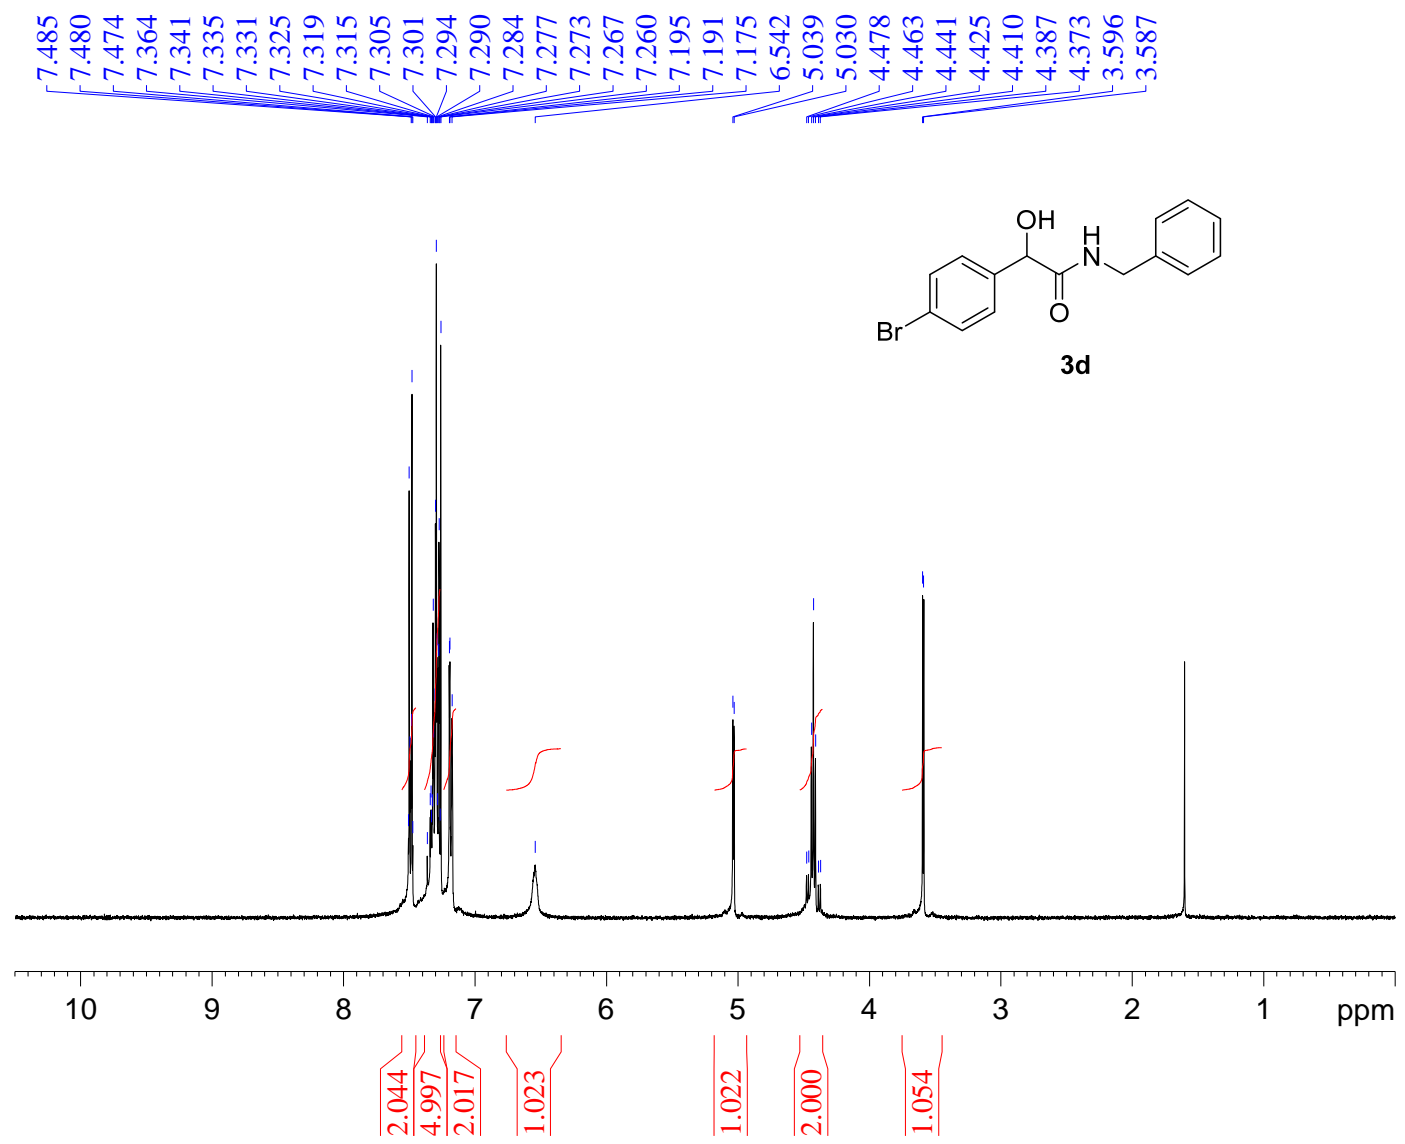

NAME Substrate 1H  
 EXPNO 13  
 PROCNO 1  
 Date\_ 20150721  
 Time 19.52  
 INSTRUM spect  
 PROBHD 5 mm DUL 13C-1  
 PULPROG zg30  
 TD 32768  
 SOLVENT CDCl3  
 NS 16  
 DS 0  
 SWH 6410.256 Hz  
 FIDRES 0.195625 Hz  
 AQ 2.5559540 sec  
 RG 4  
 DW 78.000 usec  
 DE 6.00 usec  
 TE 300.0 K  
 D1 2.00000000 sec  
 TD0 1

===== CHANNEL f1 =====  
 NUC1 1H  
 P1 10.00 usec  
 PL1 -2.40 dB  
 SFO1 400.1528010 MHz  
 SI 16384  
 SF 400.1500088 MHz  
 WDW EM  
 SSB 0  
 LB 0.00 Hz  
 GB 0  
 PC 1.00



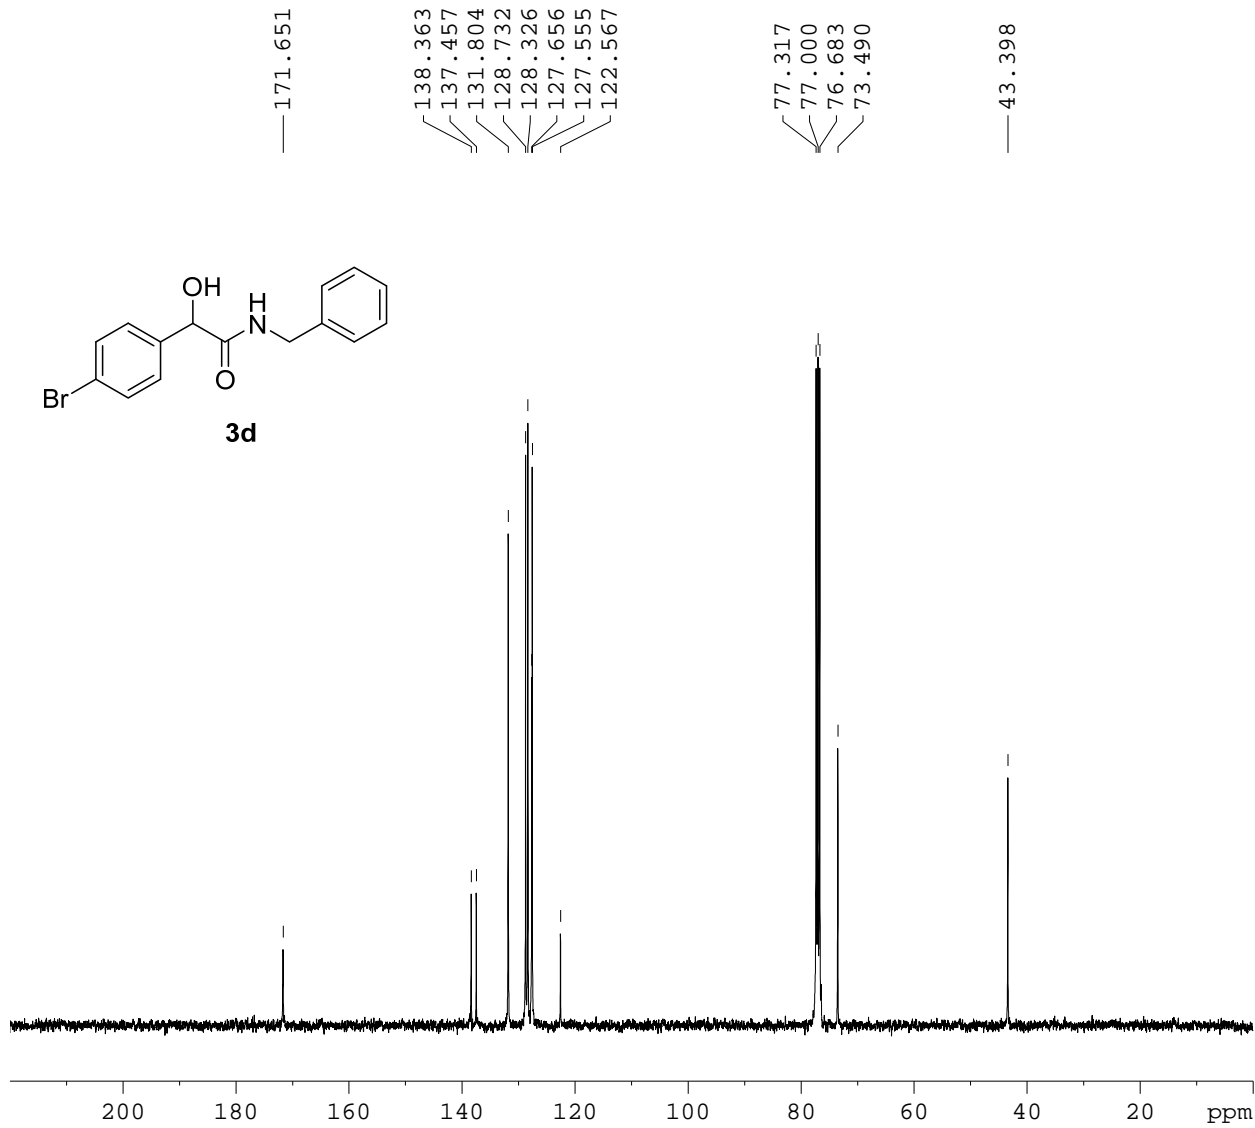

```

NAME      Substrate 13C
EXPNO     13
PROCNO    1
Date_     20150721
Time      19.56
INSTRUM   spect
PROBHD    5 mm DUL 13C-1
PULPROG   zgpg30
TD         65536
SOLVENT   CDC13
NS         816
DS         0
SWH        22727.273 Hz
FIDRES     0.346791 Hz
AQ         1.4418420 sec
RG         57
DW         22.000 usec
DE         6.00 usec
TE         300.0 K
D1         2.00000000 sec
d11        0.03000000 sec
DELTA     1.89999998 sec
TD0        1

```

```

===== CHANNEL f1 =====
NUC1      13C
P1        9.70 usec
PL1       -0.50 dB
SFO1     100.6288660 MHz

```

```

===== CHANNEL f2 =====
CPDPRG2   waltz16
NUC2       1H
PCPD2     90.00 usec
PL2        -2.40 dB
PL12       15.10 dB
PL13       18.10 dB
SFO2     400.1516010 MHz
SI         32768
SF        100.6178030 MHz
WDW        EM
SSB         0
LB          3.00 Hz
GB          0
PC          1.00

```

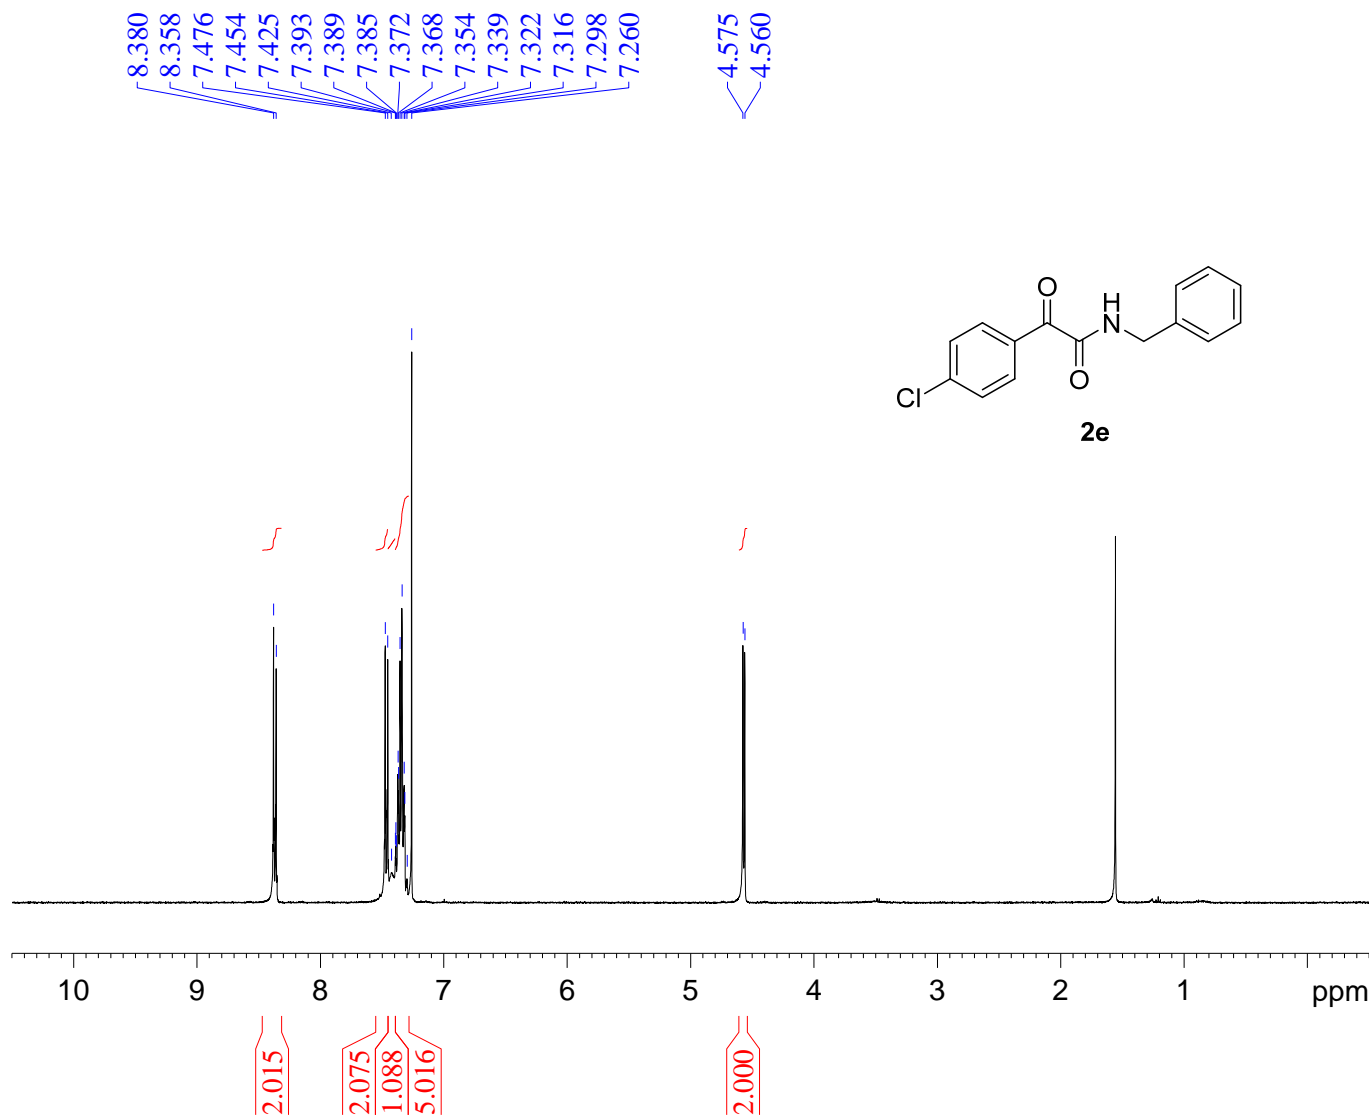

NAME 20151029  
 EXPNO 2  
 PROCNO 1  
 Date\_ 20151029  
 Time 13.54  
 INSTRUM spect  
 PROBHD 5 mm DUL 13C-1  
 PULPROG zg30  
 TD 32768  
 SOLVENT CDCl3  
 NS 71  
 DS 0  
 SWH 6410.256 Hz  
 FIDRES 0.195625 Hz  
 AQ 2.5559540 sec  
 RG 4  
 DW 78.000 usec  
 DE 6.00 usec  
 TE 300.0 K  
 D1 2.00000000 sec  
 TD0 1

===== CHANNEL f1 =====  
 NUC1 1H  
 P1 10.00 usec  
 PL1 -2.40 dB  
 SFO1 400.1528010 MHz  
 SI 16384  
 SF 400.1500088 MHz  
 WDW EM  
 SSB 0  
 LB 0.00 Hz  
 GB 0  
 PC 1.00

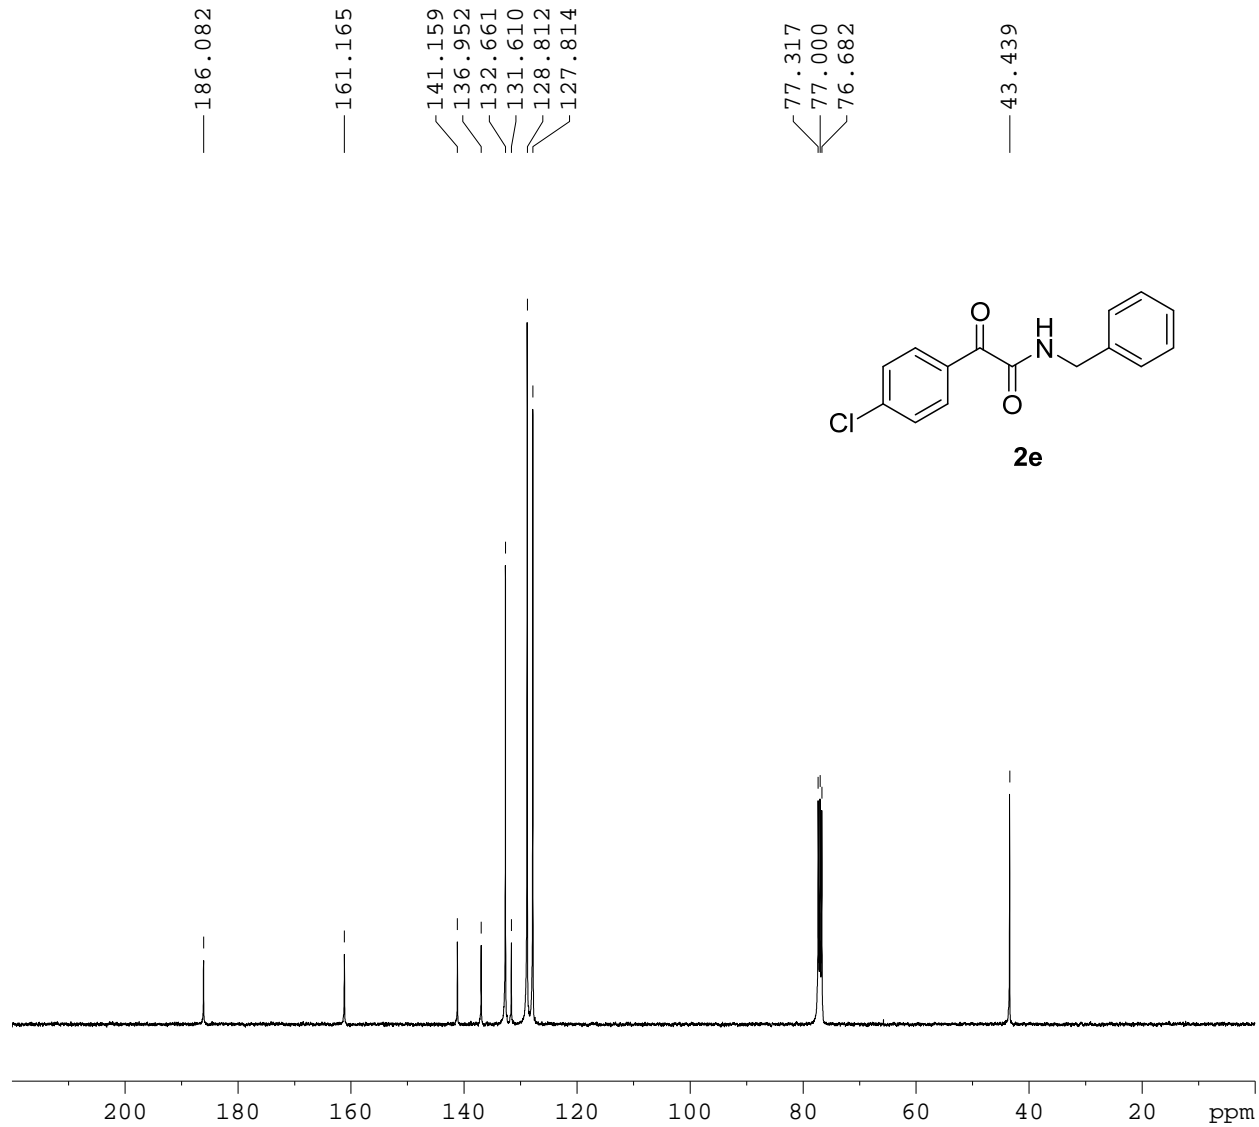

|         |                |
|---------|----------------|
| NAME    | Substrate      |
| EXPNO   | 2              |
| PROCNO  | 1              |
| Date_   | 20150208       |
| Time    | 18.15          |
| INSTRUM | spect          |
| PROBHD  | 5 mm DUL 13C-1 |
| PULPROG | zgpg30         |
| TD      | 65536          |
| SOLVENT | CDC13          |
| NS      | 1637           |
| DS      | 0              |
| SWH     | 22727.273 Hz   |
| FIDRES  | 0.346791 Hz    |
| AQ      | 1.4418420 sec  |
| RG      | 57             |
| DW      | 22.000 usec    |
| DE      | 6.00 usec      |
| TE      | 300.0 K        |
| D1      | 2.00000000 sec |
| d11     | 0.03000000 sec |
| DELTA   | 1.89999998 sec |
| TD0     | 1              |

==== CHANNEL f1 =====

|      |                 |
|------|-----------------|
| NUC1 | 13C             |
| P1   | 9.70 usec       |
| PL1  | -0.50 dB        |
| SFO1 | 100.6288660 MHz |

==== CHANNEL f2 =====

|         |                 |
|---------|-----------------|
| CPDPRG2 | waltz16         |
| NUC2    | 1H              |
| PCPD2   | 90.00 usec      |
| PL2     | -2.40 dB        |
| PL12    | 15.10 dB        |
| PL13    | 18.10 dB        |
| SFO2    | 400.1516010 MHz |
| SI      | 32768           |
| SF      | 100.6178062 MHz |
| WDW     | EM              |
| SSB     | 0               |
| LB      | 3.00 Hz         |
| GB      | 0               |
| PC      | 1.00            |

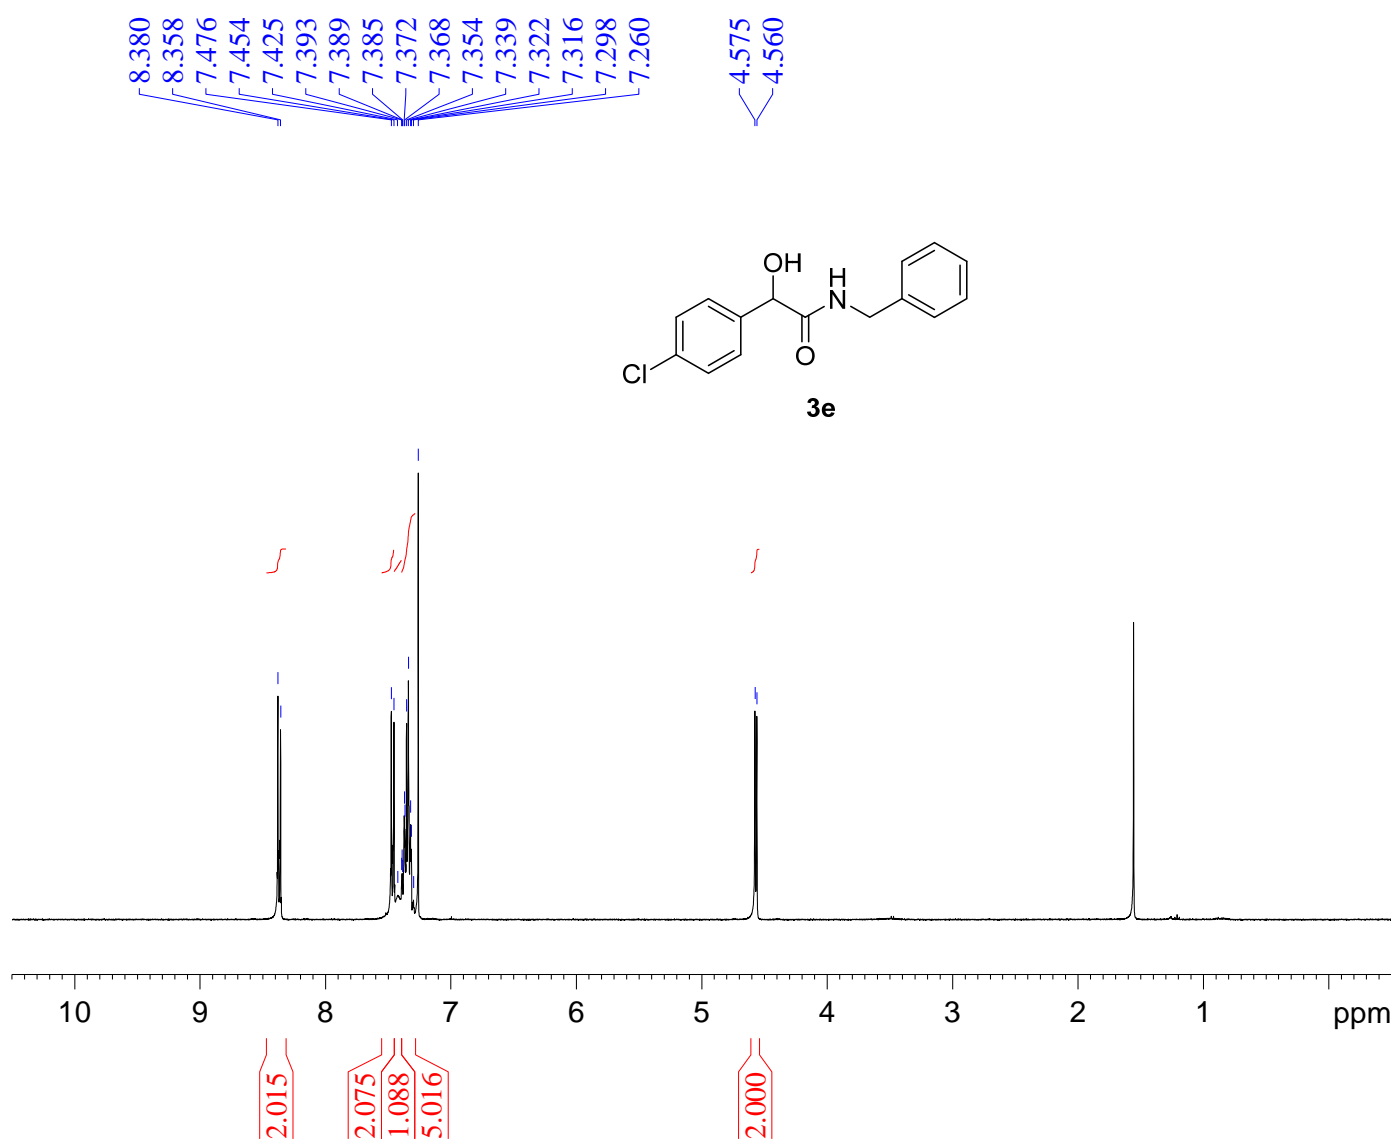

NAME 20151029  
 EXPNO 2  
 PROCNO 1  
 Date\_ 20151029  
 Time 13.54  
 INSTRUM spect  
 PROBHD 5 mm DUL 13C-1  
 PULPROG zg30  
 TD 32768  
 SOLVENT CDCl3  
 NS 71  
 DS 0  
 SWH 6410.256 Hz  
 FIDRES 0.195625 Hz  
 AQ 2.5559540 sec  
 RG 4  
 DW 78.000 usec  
 DE 6.00 usec  
 TE 300.0 K  
 D1 2.00000000 sec  
 TD0 1

===== CHANNEL f1 =====  
 NUC1 1H  
 P1 10.00 usec  
 PL1 -2.40 dB  
 SFO1 400.1528010 MHz  
 SI 16384  
 SF 400.1500088 MHz  
 WDW EM  
 SSB 0  
 LB 0.00 Hz  
 GB 0  
 PC 1.00

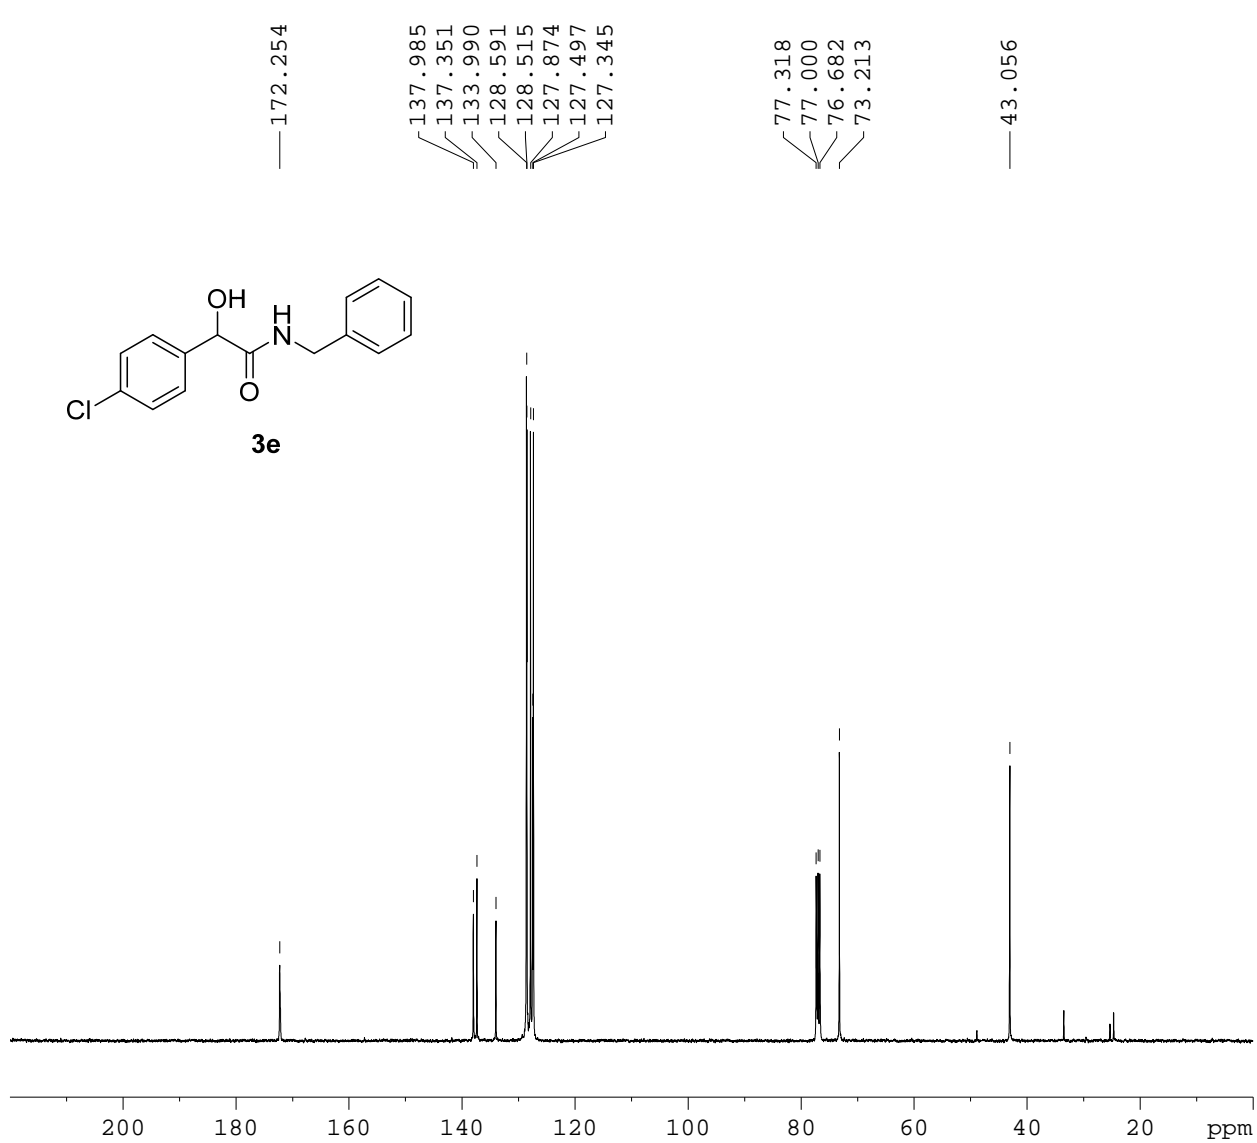

```

NAME          13C
EXPNO         3
PROCNO        1
Date_         20150125
Time          18.17
INSTRUM       spect
PROBHD        5 mm DUL 13C-1
PULPROG       zgpg30
TD            65536
SOLVENT       CDC13
NS            1157
DS            0
SWH           22727.273 Hz
FIDRES        0.346791 Hz
AQ            1.4418420 sec
RG            57
DW            22.000 usec
DE            6.00 usec
TE            300.0 K
D1            2.00000000 sec
d11           0.03000000 sec
DELTA         1.899999998 sec
TD0           1

```

```

===== CHANNEL f1 =====
NUC1          13C
P1            9.70 usec
PL1           -0.50 dB
SFO1          100.6288660 MHz

```

```

===== CHANNEL f2 =====
CPDPRG2       waltz16
NUC2          1H
PCPD2         90.00 usec
PL2           -2.40 dB
PL12          15.10 dB
PL13          18.10 dB
SFO2          400.1516010 MHz
SI            32768
SF            100.6178146 MHz
WDW           EM
SSB           0
LB            3.00 Hz
GB            0
PC            1.00

```

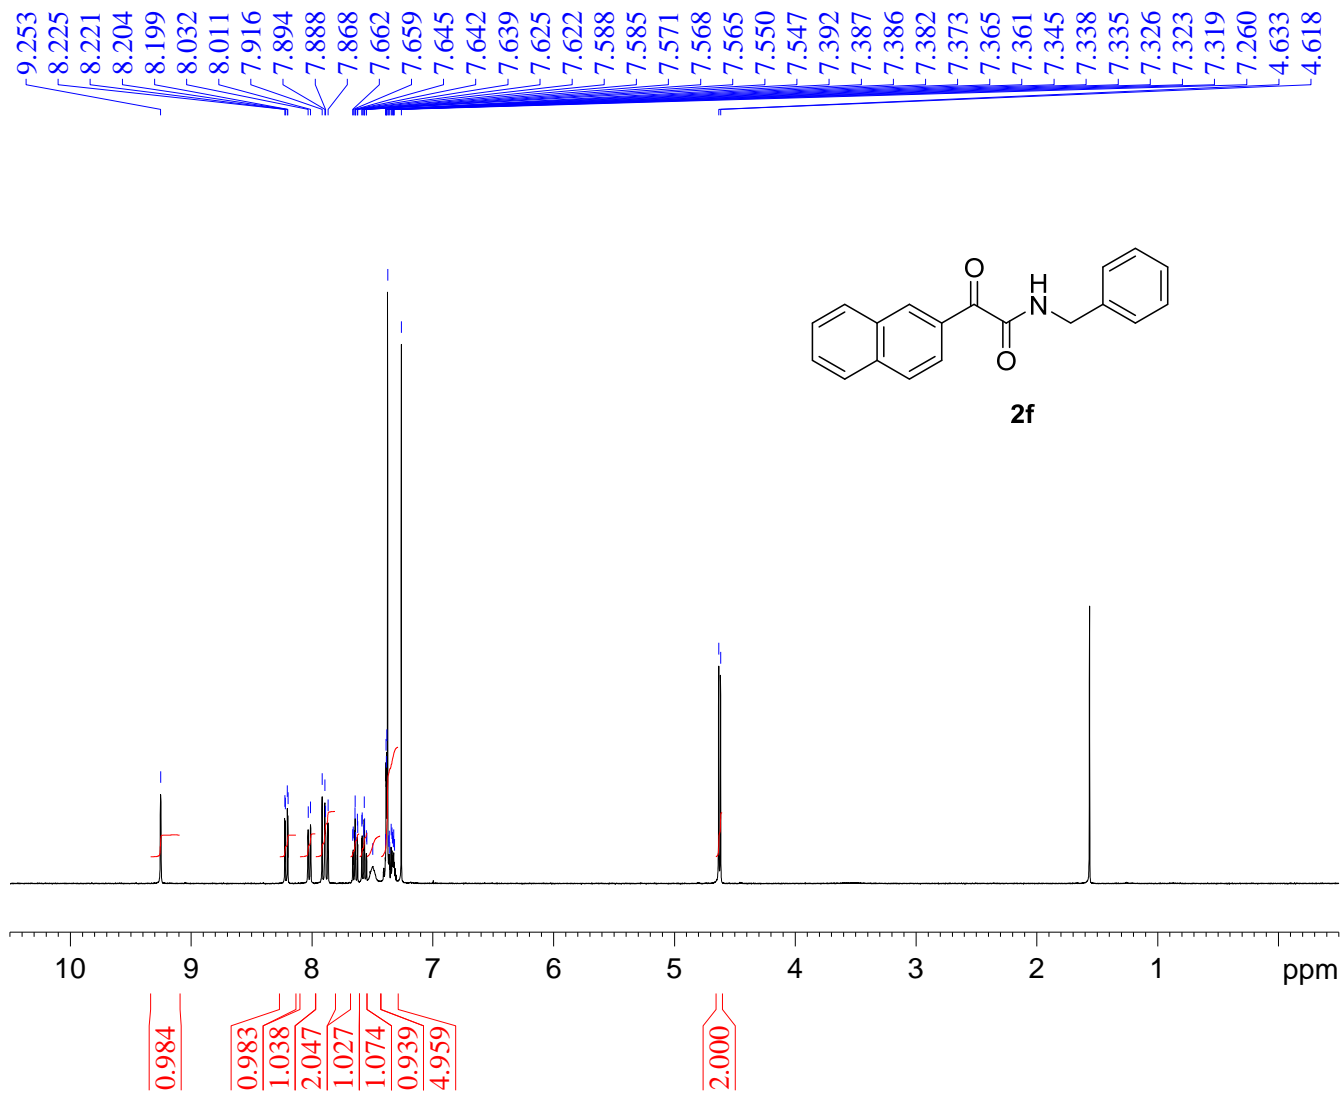

NAME Substrate 1H  
 EXPNO 4  
 PROCNO 1  
 Date\_ 20150613  
 Time 16.55  
 INSTRUM spect  
 PROBHD 5 mm DUL 13C-1  
 PULPROG zg30  
 TD 32768  
 SOLVENT CDCl3  
 NS 44  
 DS 0  
 SWH 6410.256 Hz  
 FIDRES 0.195625 Hz  
 AQ 2.5559540 sec  
 RG 4  
 DW 78.000 usec  
 DE 6.00 usec  
 TE 300.0 K  
 D1 2.00000000 sec  
 TD0 1

===== CHANNEL f1 =====  
 NUC1 1H  
 P1 10.00 usec  
 PL1 -2.40 dB  
 SFO1 400.1528010 MHz  
 SI 16384  
 SF 400.1500088 MHz  
 WDW EM  
 SSB 0  
 LB 0.00 Hz  
 GB 0  
 PC 1.00

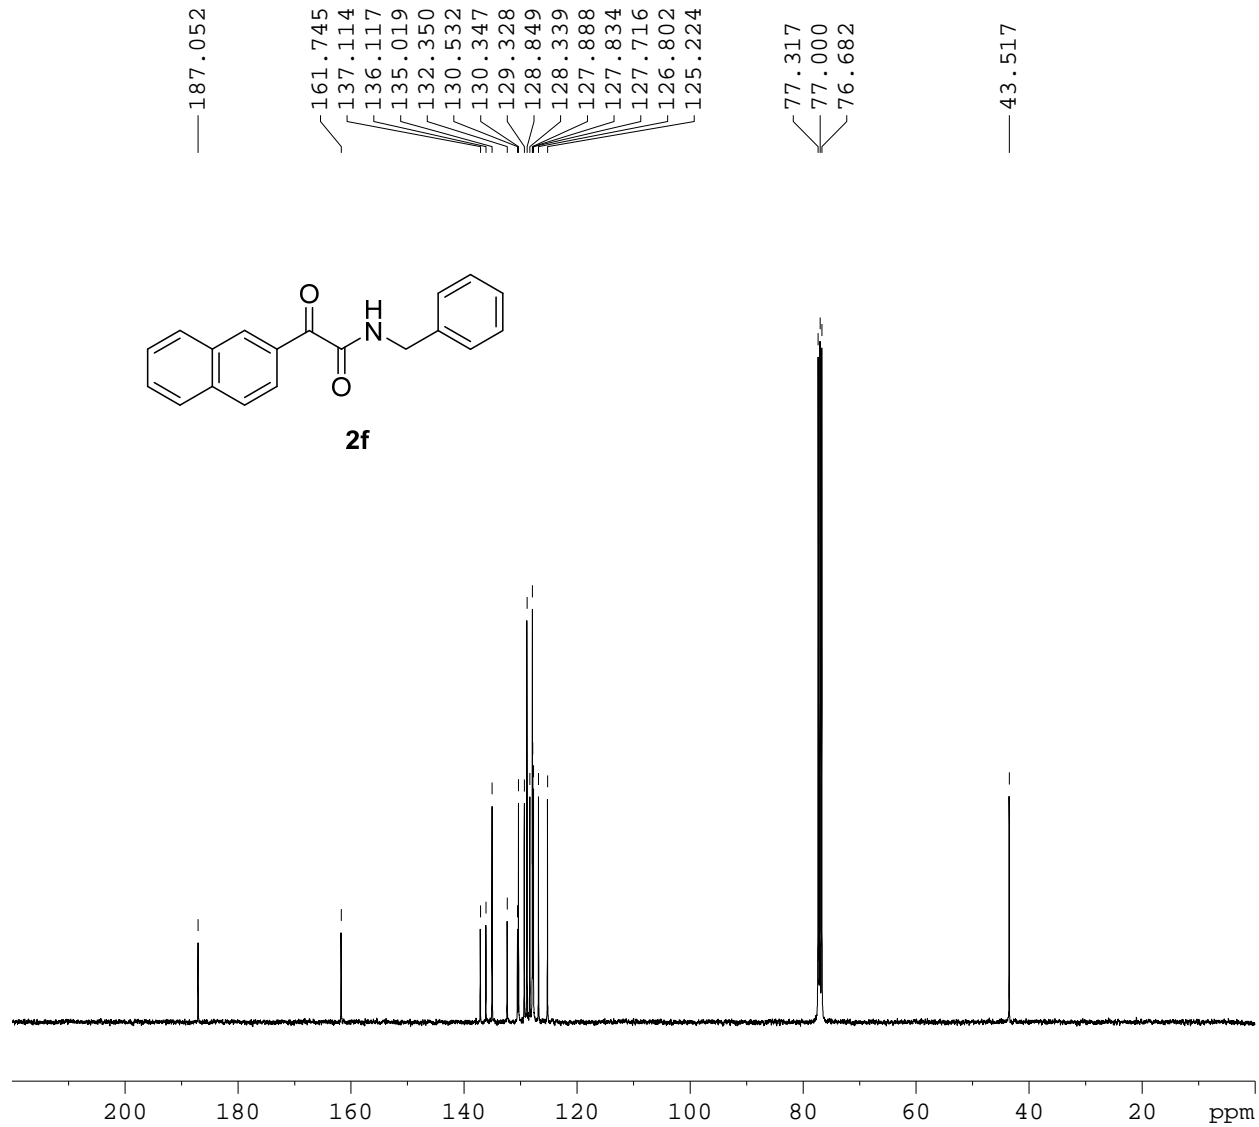

```

NAME      Substrate 13C
EXPNO      4
PROCNO     1
Date_      20150613
Time       17.03
INSTRUM    spect
PROBHD     5 mm DUL 13C-1
PULPROG    zgpg30
TD         65536
SOLVENT    CDC13
NS         1880
DS         0
SWH        22727.273 Hz
FIDRES     0.346791 Hz
AQ         1.4418420 sec
RG         57
DW         22.000 usec
DE         6.00 usec
TE         300.0 K
D1         2.00000000 sec
d11        0.03000000 sec
DELTA      1.89999998 sec
TD0        1

```

```

===== CHANNEL f1 =====
NUC1       13C
P1         9.70 usec
PL1        -0.50 dB
SFO1       100.6288660 MHz

```

```

===== CHANNEL f2 =====
CPDPRG2    waltz16
NUC2       1H
PCPD2      90.00 usec
PL2        -2.40 dB
PL12       15.10 dB
PL13       18.10 dB
SFO2       400.1516010 MHz
SI         32768
SF         100.6178023 MHz
WDW        EM
SSB        0
LB         3.00 Hz
GB         0
PC         1.00

```

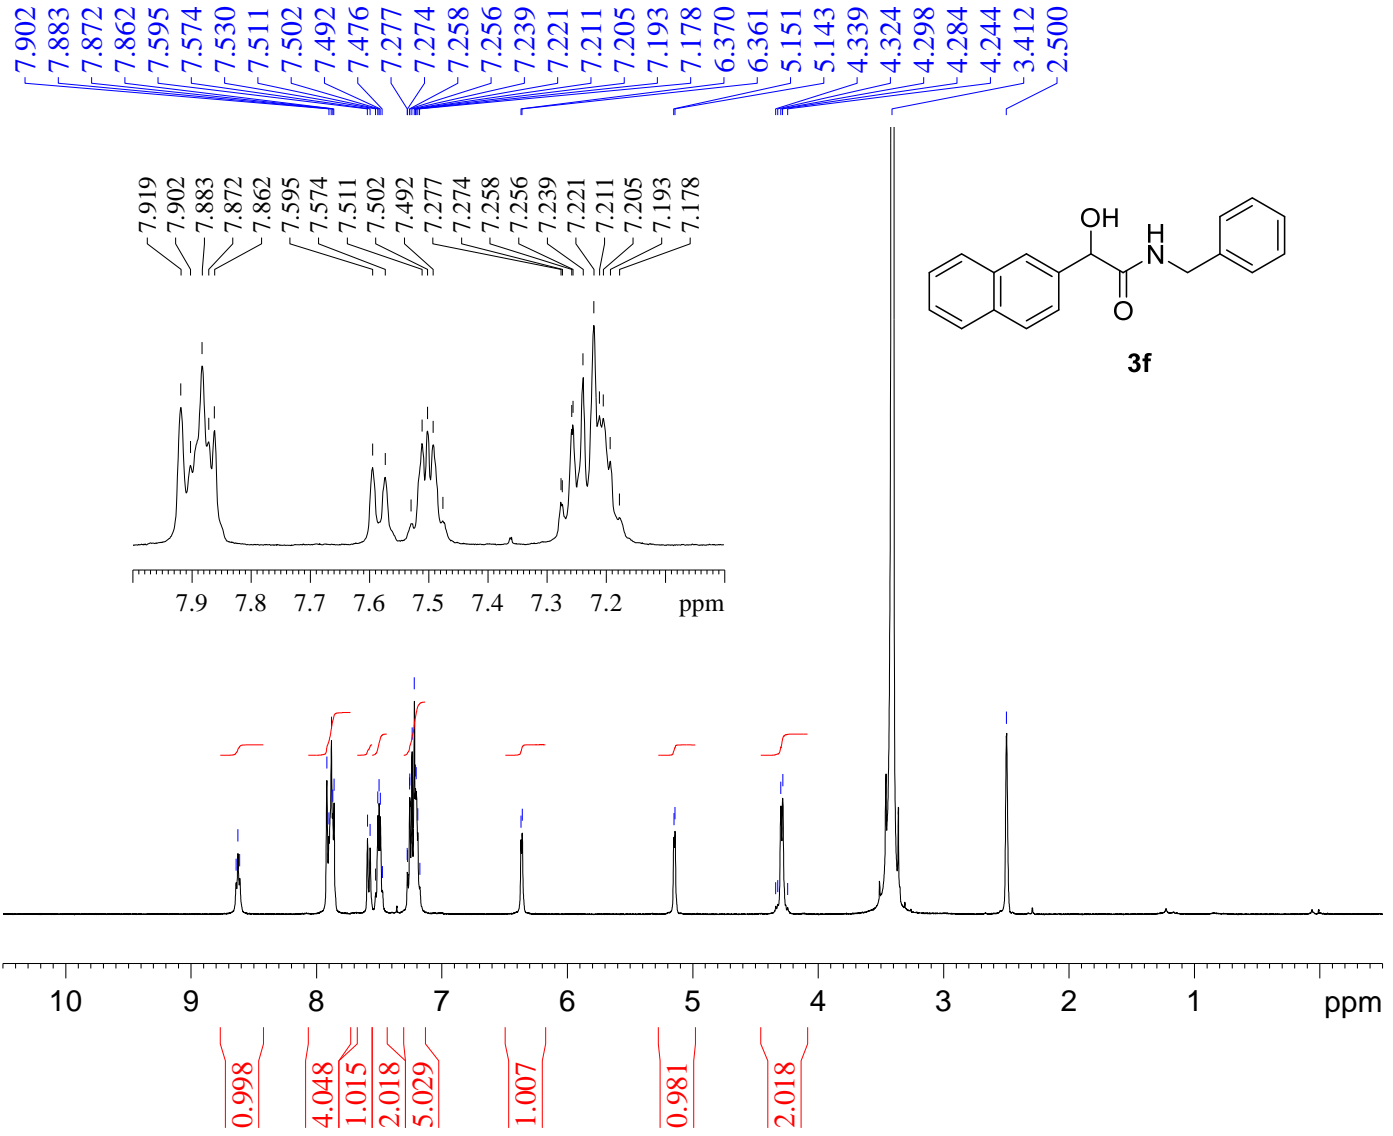

```

NAME      Substrate 1H
EXPNO     5
PROCNO    1
Date_     20150707
Time      11.12
INSTRUM   spect
PROBHD    5 mm DUL 13C-1
PULPROG   zg30
TD         32768
SOLVENT   DMSO
NS         64
DS         0
SWH       6410.256 Hz
FIDRES    0.195625 Hz
AQ        2.5559540 sec
RG         4
DW        78.000 usec
DE         6.00 usec
TE         300.0 K
D1        2.00000000 sec
TD0       1

===== CHANNEL f1 =====
NUC1      1H
P1        10.00 usec
PL1       -2.40 dB
SFO1     400.1528010 MHz
SI        16384
SF        400.1500033 MHz
WDW       EM
SSB       0
LB        0.00 Hz
GB        0
PC        1.00

```



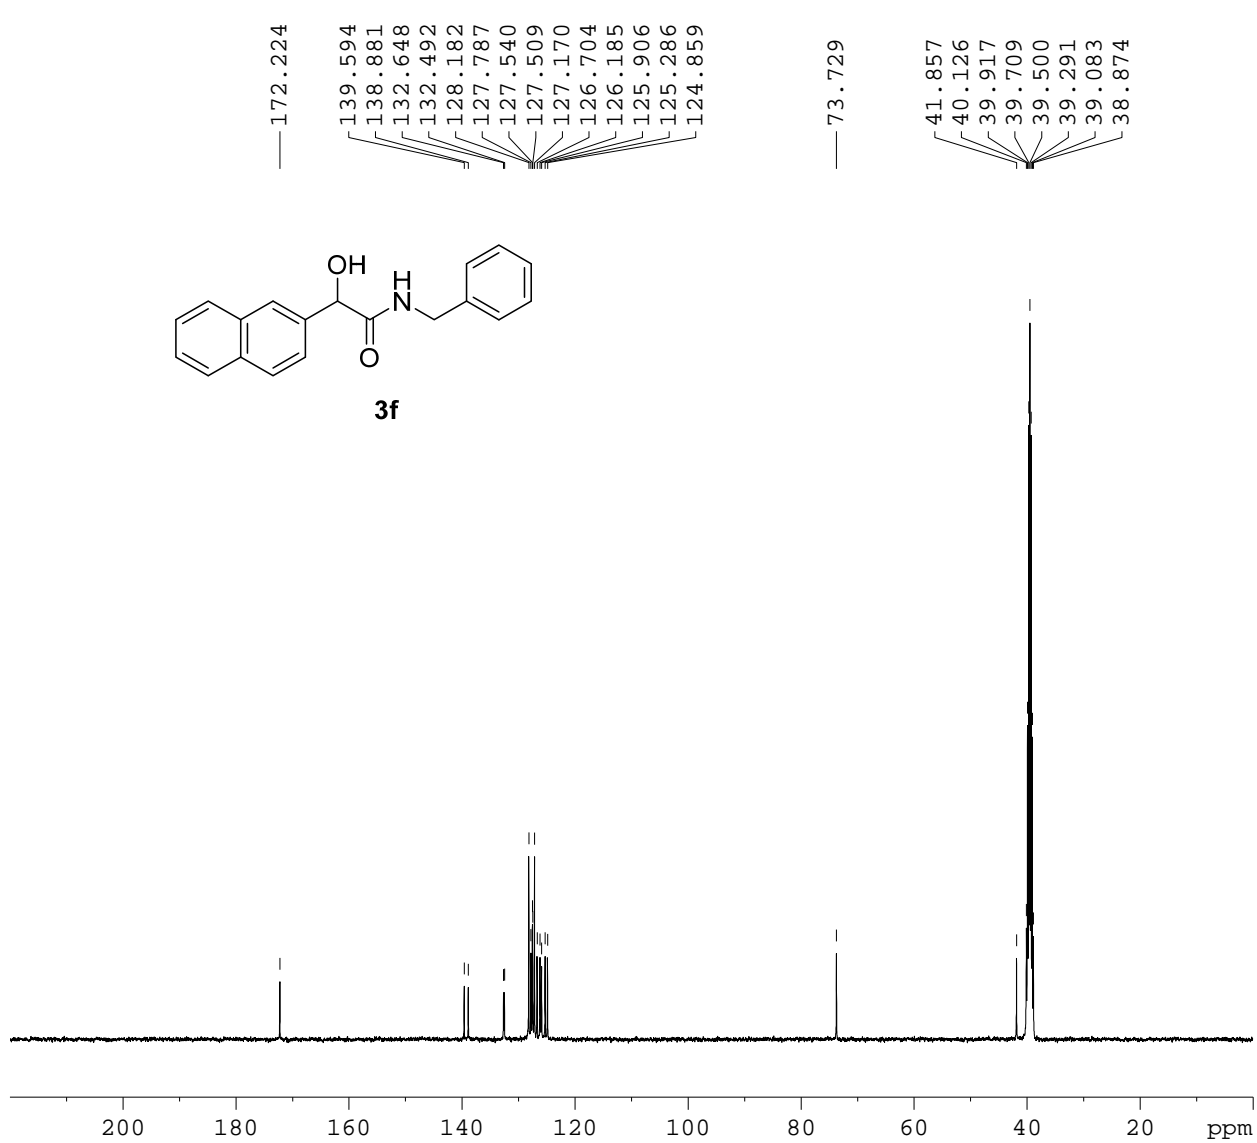

```

NAME      Substrate 13C
EXPNO      5
PROCNO     1
Date_      20150711
Time       16.48
INSTRUM    spect
PROBHD     5 mm DUL 13C-1
PULPROG    zgpg30
TD          65536
SOLVENT    CDCl3
NS          773
DS          0
SWH         22727.273 Hz
FIDRES     0.346791 Hz
AQ          1.4418420 sec
RG          57
DW          22.000 usec
DE          6.00 usec
TE          300.0 K
D1          2.00000000 sec
d11         0.03000000 sec
DELTA      1.89999998 sec
TD0         1

```

```

===== CHANNEL f1 =====
NUC1       13C
P1         9.70 usec
PL1        -0.50 dB
SFO1       100.6288660 MHz

```

```

===== CHANNEL f2 =====
CPDPRG2    waltz16
NUC2       1H
PCPD2      90.00 usec
PL2        -2.40 dB
PL12       15.10 dB
PL13       18.10 dB
SFO2       400.1516010 MHz
SI         32768
SF         100.6178424 MHz
WDW         EM
SSB         0
LB          3.00 Hz
GB          0
PC          1.00

```

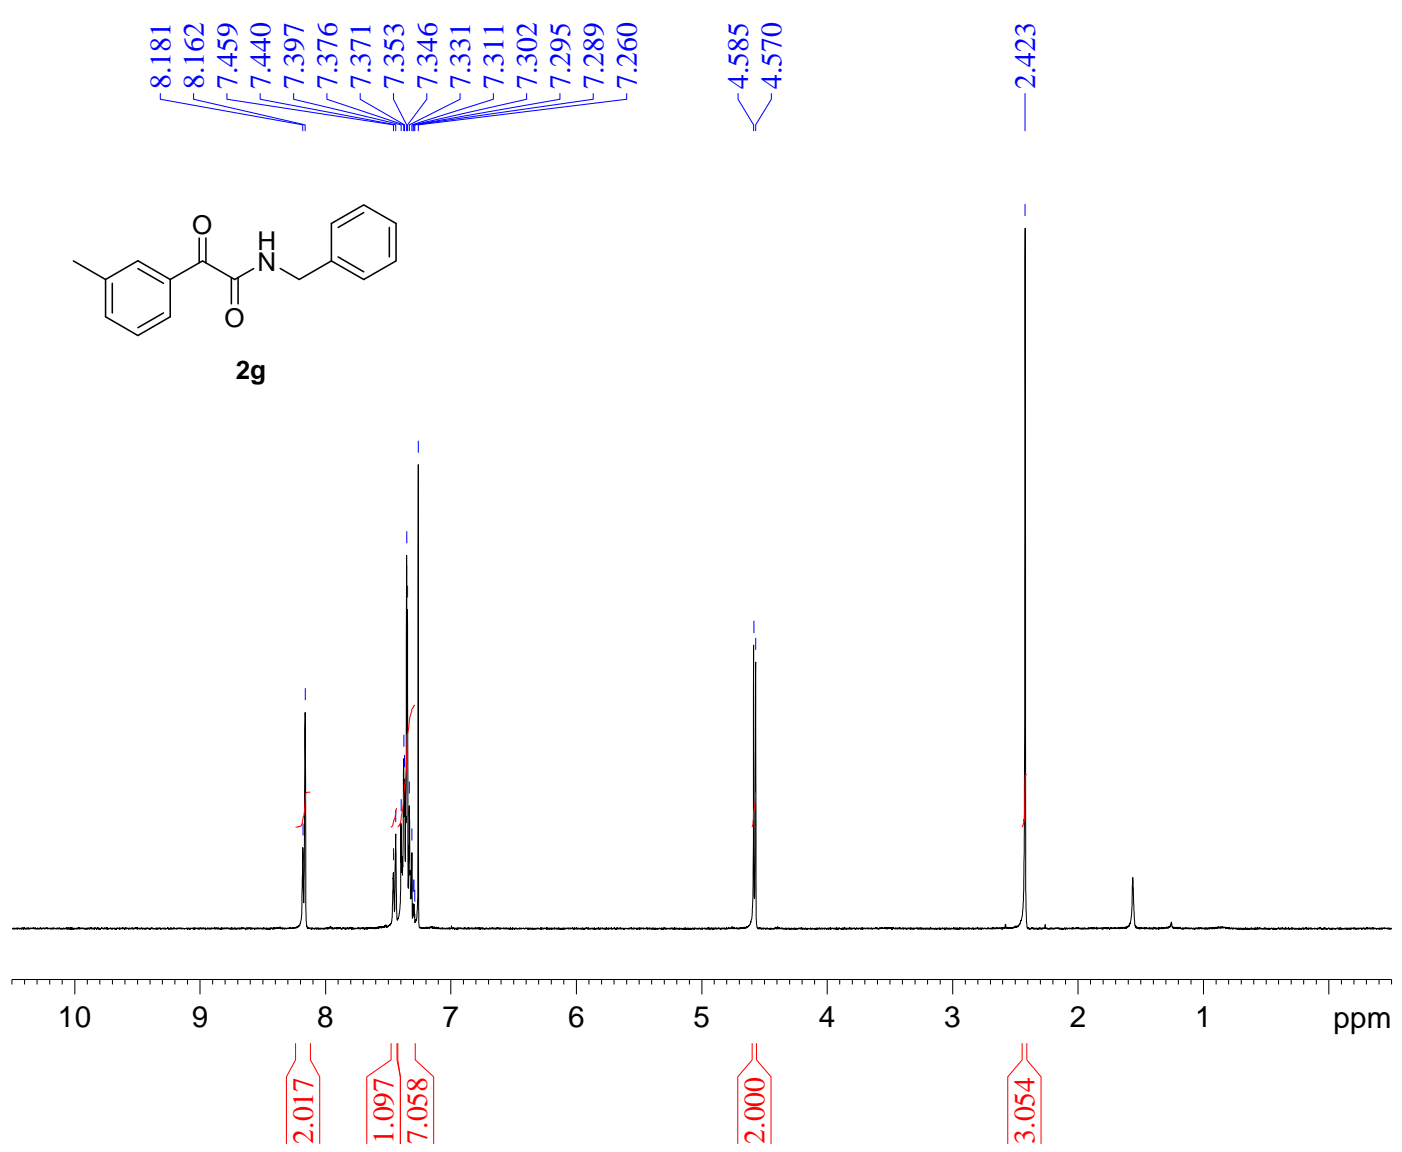

NAME 20151103  
 EXPNO 2  
 PROCNO 1  
 Date\_ 20151103  
 Time 20.08  
 INSTRUM spect  
 PROBHD 5 mm DUL 13C-1  
 PULPROG zg30  
 TD 32768  
 SOLVENT CDCl3  
 NS 24  
 DS 0  
 SWH 6410.256 Hz  
 FIDRES 0.195625 Hz  
 AQ 2.5559540 sec  
 RG 4  
 DW 78.000 usec  
 DE 6.00 usec  
 TE 300.0 K  
 D1 2.00000000 sec  
 TD0 1

===== CHANNEL f1 =====  
 NUC1 1H  
 P1 10.00 usec  
 PL1 -2.40 dB  
 SFO1 400.1528010 MHz  
 SI 16384  
 SF 400.1500089 MHz  
 WDW EM  
 SSB 0  
 LB 0.00 Hz  
 GB 0  
 PC 1.00

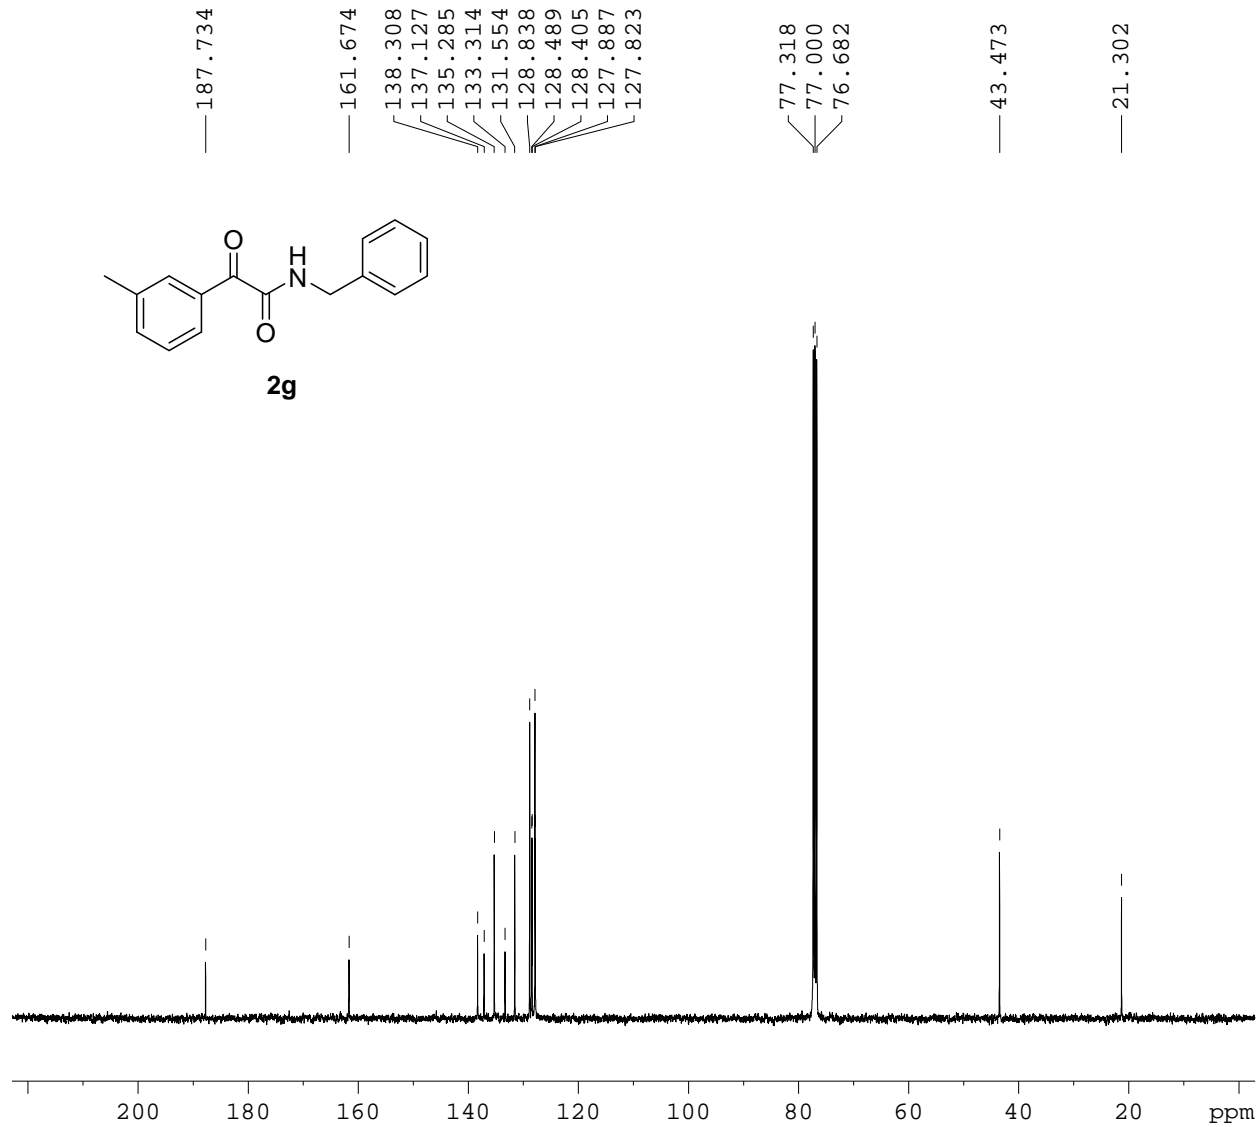

```

NAME          20151103
EXPNO         3
PROCNO        1
Date_         20151103
Time          20.14
INSTRUM       spect
PROBHD        5 mm DUL 13C-1
PULPROG       zgpg30
TD            65536
SOLVENT       CDC13
NS            761
DS            0
SWH           22727.273 Hz
FIDRES        0.346791 Hz
AQ            1.4418420 sec
RG            57
DW            22.000 usec
DE            6.00 usec
TE            300.0 K
D1            2.00000000 sec
d11           0.03000000 sec
DELTA         1.89999998 sec
TD0           1

```

```

===== CHANNEL f1 =====
NUC1          13C
P1            9.70 usec
PL1           -0.50 dB
SFO1         100.6288660 MHz

```

```

===== CHANNEL f2 =====
CPDPRG2       waltz16
NUC2          1H
PCPD2         90.00 usec
PL2           -2.40 dB
PL12          15.10 dB
PL13          18.10 dB
SFO2         400.1516010 MHz
SI            32768
SF            100.6178003 MHz
WDW           EM
SSB           0
LB            3.00 Hz
GB            0
PC            1.00

```

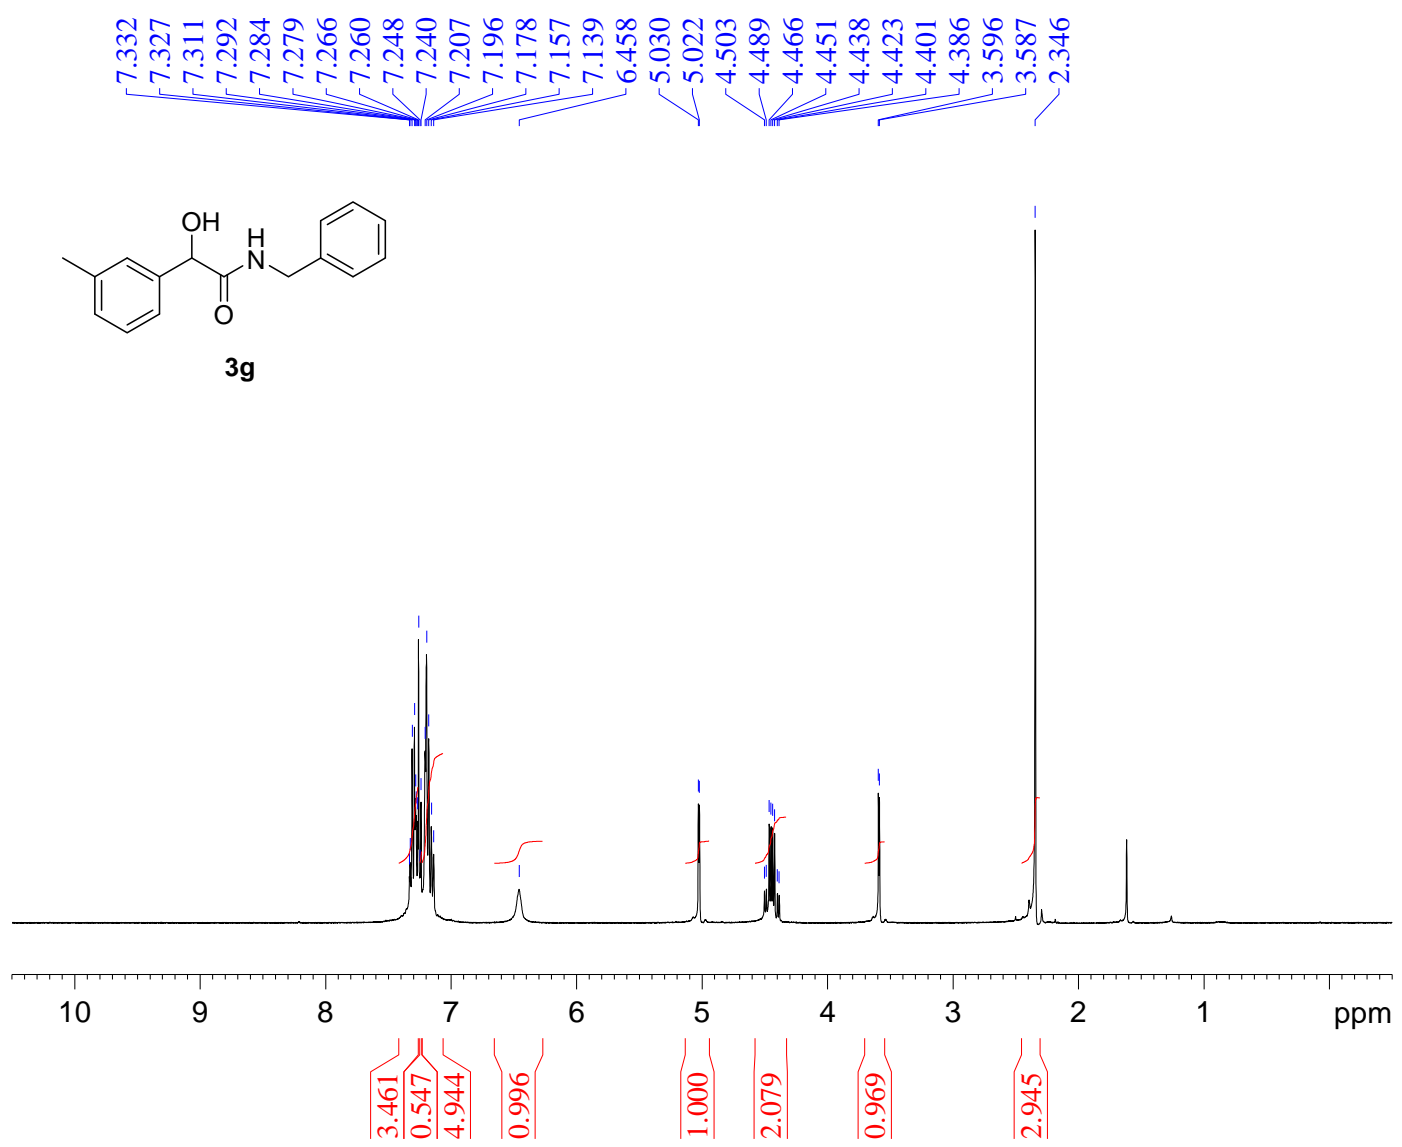

NAME 20151017  
 EXPNO 1  
 PROCNO 1  
 Date\_ 20151017  
 Time 17.29  
 INSTRUM spect  
 PROBHD 5 mm DUL 13C-1  
 PULPROG zg30  
 TD 32768  
 SOLVENT CDCl<sub>3</sub>  
 NS 40  
 DS 0  
 SWH 6410.256 Hz  
 FIDRES 0.195625 Hz  
 AQ 2.5559540 sec  
 RG 4  
 DW 78.000 usec  
 DE 6.00 usec  
 TE 300.0 K  
 D1 2.00000000 sec  
 TD0 1

===== CHANNEL f1 =====  
 NUC1 1H  
 P1 10.00 usec  
 PL1 -2.40 dB  
 SFO1 400.1528010 MHz  
 SI 16384  
 SF 400.1500092 MHz  
 WDW EM  
 SSB 0  
 LB 0.00 Hz  
 GB 0  
 PC 1.00

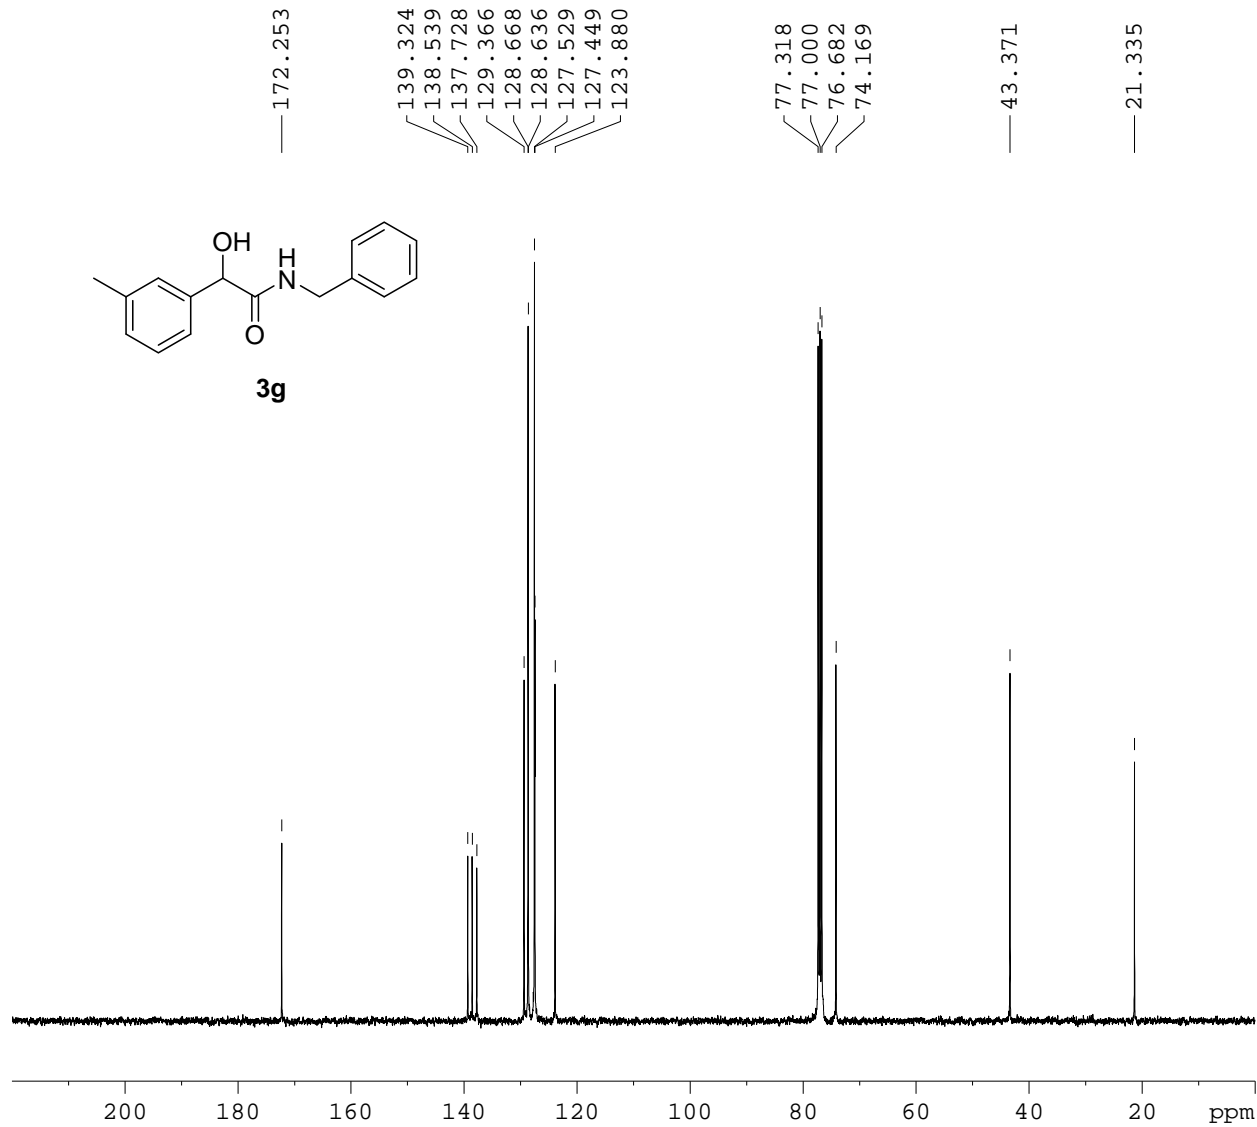

```

NAME      Substrate 13C
EXPNO      23
PROCNO     1
Date_      20151018
Time       16.11
INSTRUM    spect
PROBHD     5 mm DUL 13C-1
PULPROG    zgpg30
TD         65536
SOLVENT    CDCl3
NS         1116
DS         0
SWH        22727.273 Hz
FIDRES     0.346791 Hz
AQ         1.4418420 sec
RG         57
DW         22.000 usec
DE         6.00 usec
TE         300.0 K
D1         2.00000000 sec
d11        0.03000000 sec
DELTA      1.89999998 sec
TD0        1

```

```

===== CHANNEL f1 =====
NUC1       13C
P1         9.70 usec
PL1        -0.50 dB
SFO1       100.6288660 MHz

```

```

===== CHANNEL f2 =====
CPDPRG2    waltz16
NUC2       1H
PCPD2      90.00 usec
PL2        -2.40 dB
PL12       15.10 dB
PL13       18.10 dB
SFO2       400.1516010 MHz
SI         32768
SF         100.6178044 MHz
WDW        EM
SSB        0
LB         3.00 Hz
GB         0
PC         1.00

```

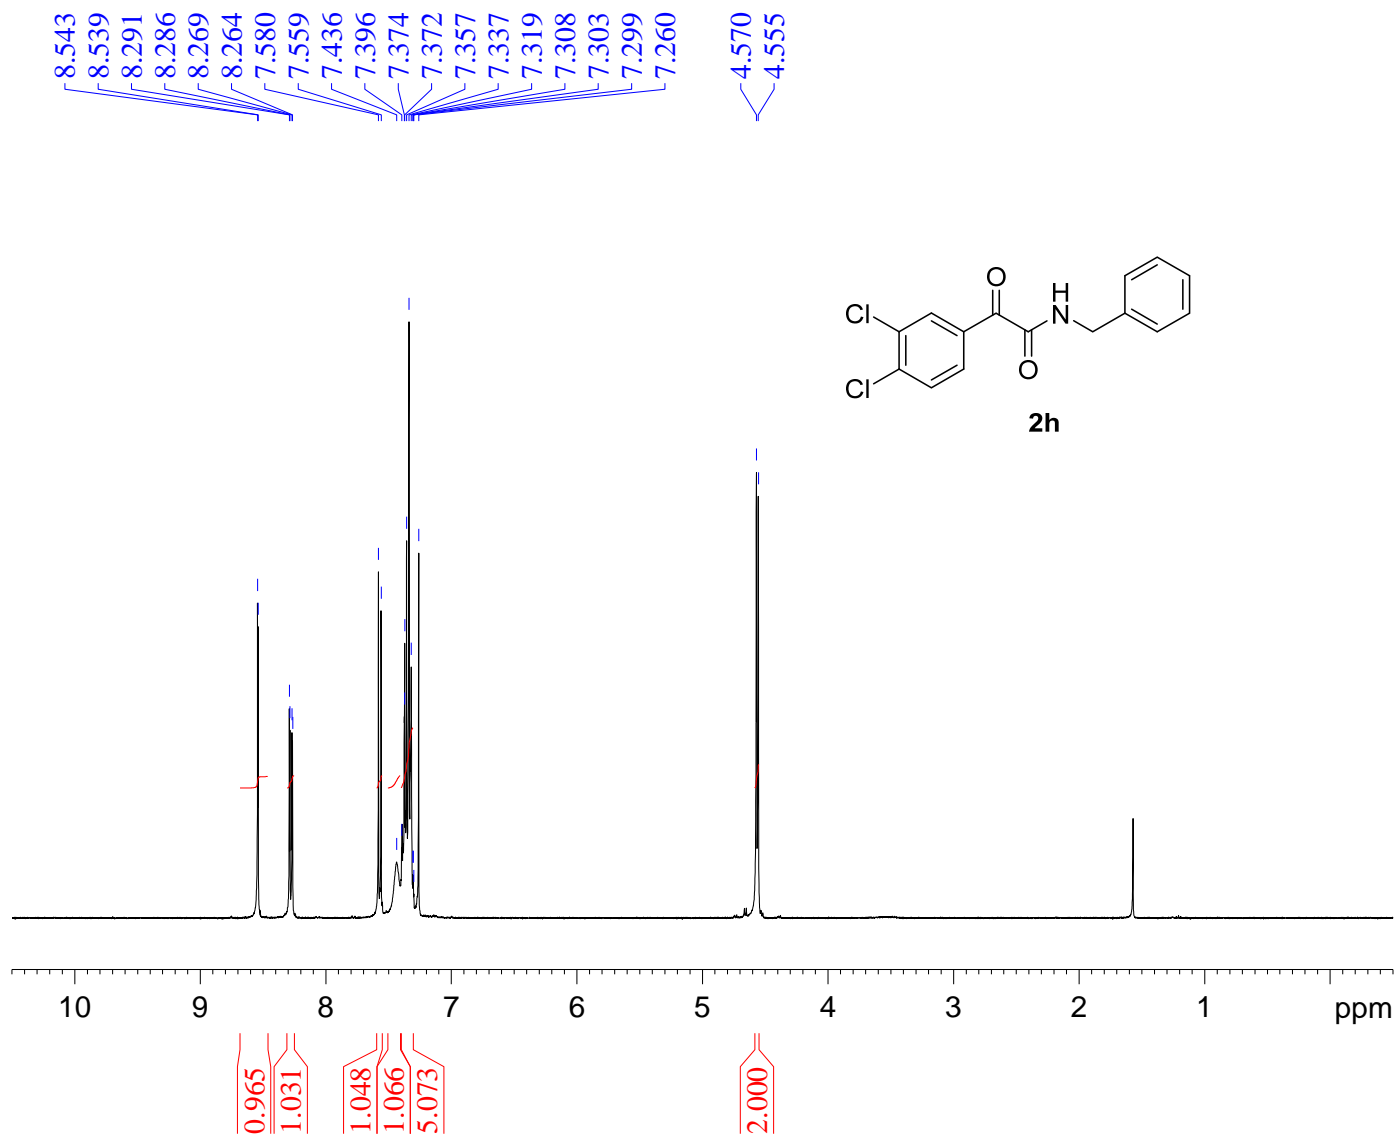

NAME 20151207  
 EXPNO 1  
 PROCNO 1  
 Date\_ 20151207  
 Time 9.50  
 INSTRUM spect  
 PROBHD 5 mm DUL 13C-1  
 PULPROG zg30  
 TD 32768  
 SOLVENT CDCl3  
 NS 32  
 DS 0  
 SWH 6410.256 Hz  
 FIDRES 0.195625 Hz  
 AQ 2.5559540 sec  
 RG 4  
 DW 78.000 usec  
 DE 6.00 usec  
 TE 300.0 K  
 D1 2.00000000 sec  
 TD0 1

===== CHANNEL f1 =====  
 NUC1 1H  
 P1 10.00 usec  
 PL1 -2.40 dB  
 SFO1 400.1528010 MHz  
 SI 16384  
 SF 400.1500089 MHz  
 WDW EM  
 SSB 0  
 LB 0.00 Hz  
 GB 0  
 PC 1.00

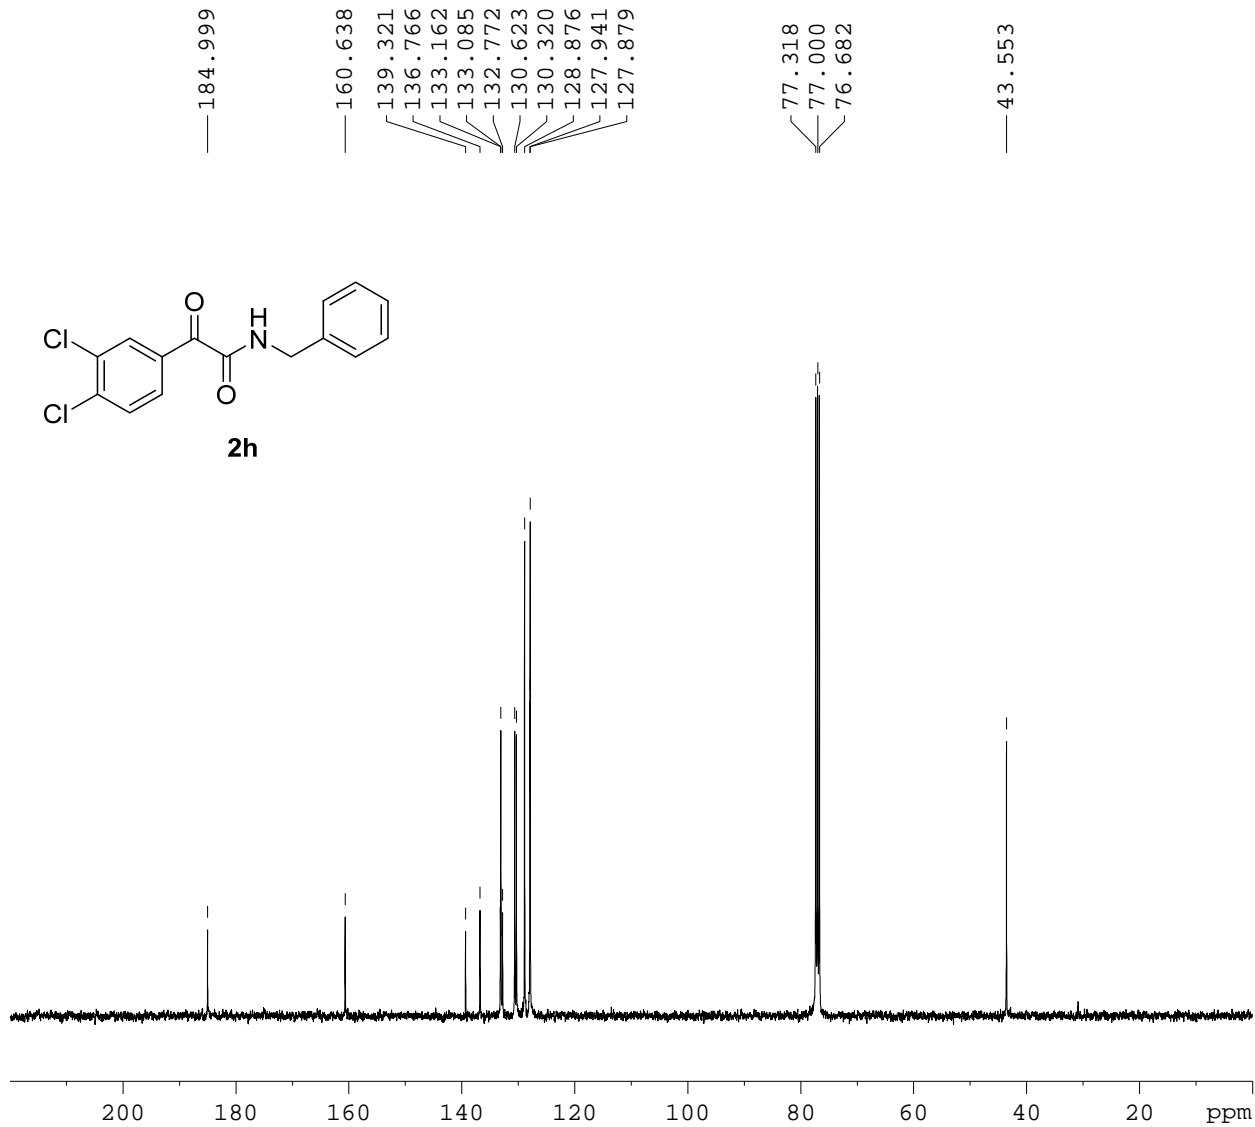

```

NAME          20151208
EXPNO         2
PROCNO        1
Date_         20151208
Time          21.22
INSTRUM       spect
PROBHD        5 mm DUL 13C-1
PULPROG       zgpg30
TD            65536
SOLVENT       CDC13
NS            666
DS            0
SWH           22727.273 Hz
FIDRES        0.346791 Hz
AQ            1.4418420 sec
RG            57
DW            22.000 usec
DE            6.00 usec
TE            300.0 K
D1            2.00000000 sec
d11           0.03000000 sec
DELTA         1.89999998 sec
TD0           1

```

```

===== CHANNEL f1 =====
NUC1          13C
P1            9.70 usec
PL1           -0.50 dB
SFO1          100.6288660 MHz

```

```

===== CHANNEL f2 =====
CPDPRG2       waltz16
NUC2          1H
PCPD2         90.00 usec
PL2           -2.40 dB
PL12          15.10 dB
PL13          18.10 dB
SFO2          400.1516010 MHz
SI            32768
SF            100.6178028 MHz
WDW           EM
SSB           0
LB            3.00 Hz
GB            0
PC            1.00

```

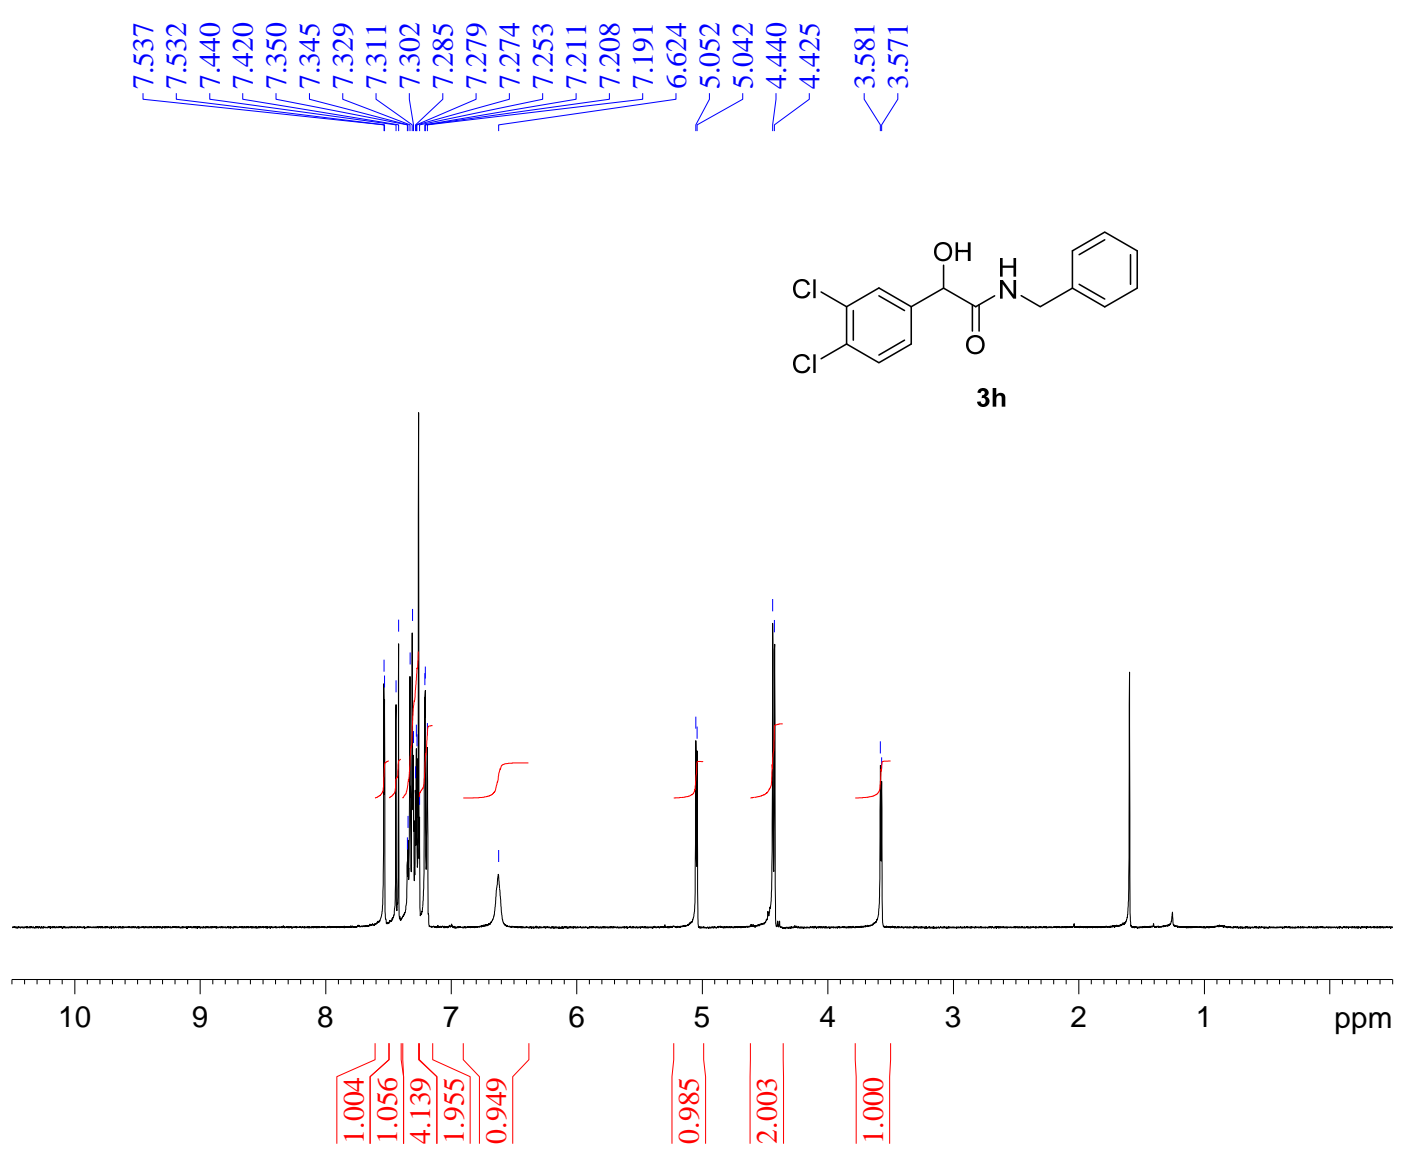

NAME 20151209  
 EXPNO 1  
 PROCNO 1  
 Date\_ 20151209  
 Time 20.04  
 INSTRUM spect  
 PROBHD 5 mm DUL 13C-1  
 PULPROG zg30  
 TD 32768  
 SOLVENT CDCl3  
 NS 64  
 DS 0  
 SWH 6410.256 Hz  
 FIDRES 0.195625 Hz  
 AQ 2.5559540 sec  
 RG 4  
 DW 78.000 usec  
 DE 6.00 usec  
 TE 300.0 K  
 D1 2.00000000 sec  
 TD0 1

===== CHANNEL f1 =====  
 NUC1 1H  
 P1 10.00 usec  
 PL1 -2.40 dB  
 SFO1 400.1528010 MHz  
 SI 16384  
 SF 400.1500088 MHz  
 WDW EM  
 SSB 0  
 LB 0.00 Hz  
 GB 0  
 PC 1.00



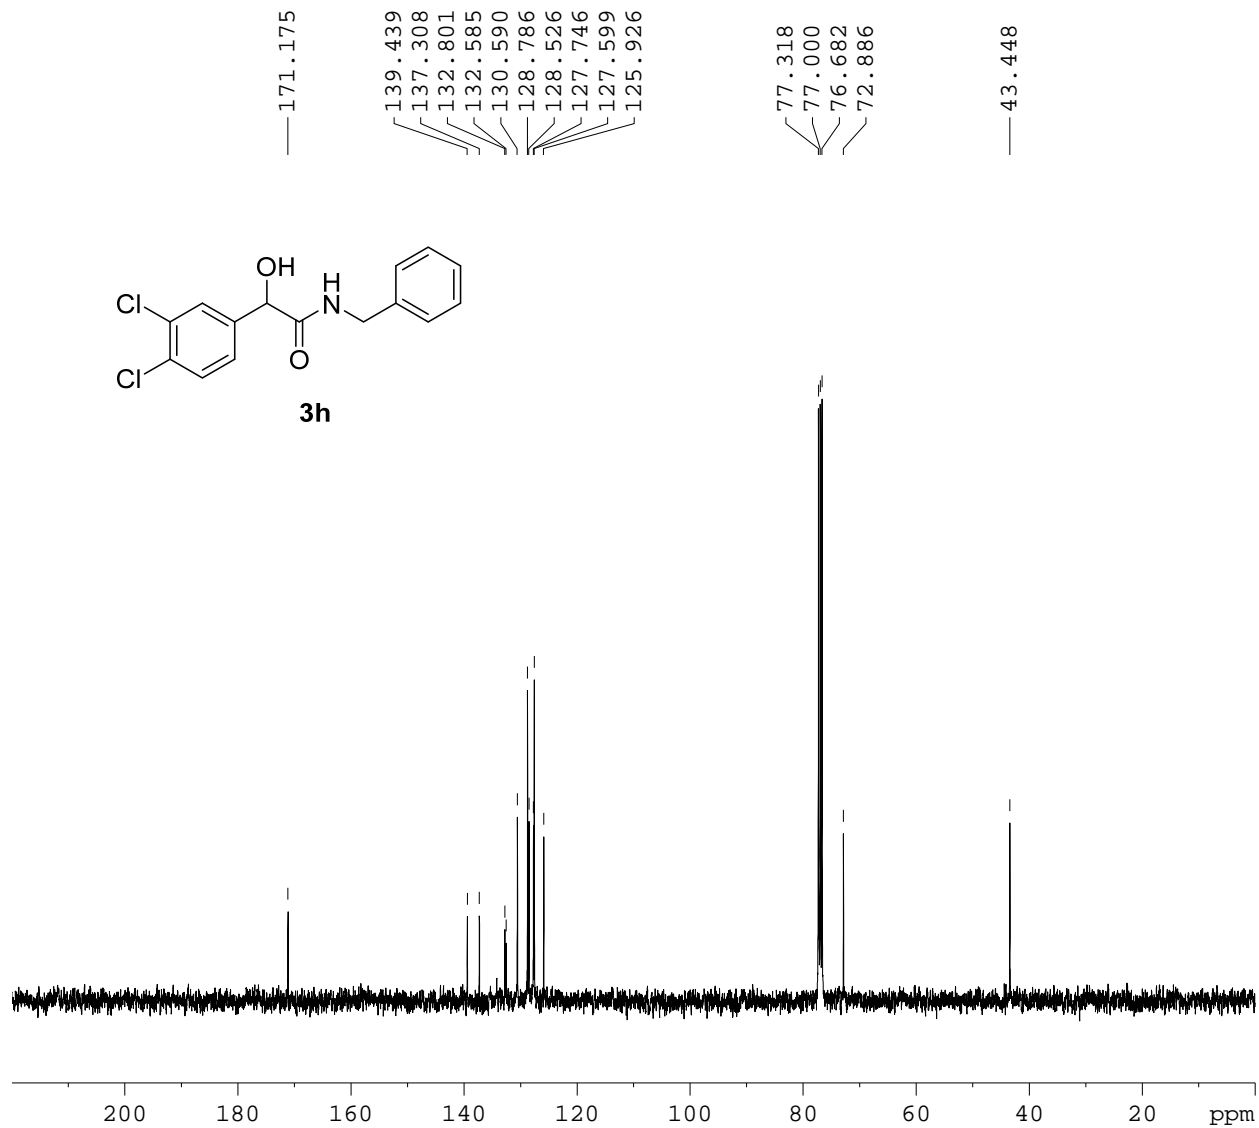

```

NAME          20151209
EXPNO         2
PROCNO        1
Date_         20151209
Time          20.13
INSTRUM       spect
PROBHD        5 mm DUL 13C-1
PULPROG       zgpg30
TD            65536
SOLVENT       CDC13
NS            100
DS            0
SWH           22727.273 Hz
FIDRES        0.346791 Hz
AQ            1.4418420 sec
RG            57
DW            22.000 usec
DE            6.00 usec
TE            300.0 K
D1            2.00000000 sec
d11           0.03000000 sec
DELTA         1.89999998 sec
TD0           1

```

```

===== CHANNEL f1 =====
NUC1          13C
P1            9.70 usec
PL1           -0.50 dB
SFO1          100.6288660 MHz

```

```

===== CHANNEL f2 =====
CPDPRG2       waltz16
NUC2          1H
PCPD2         90.00 usec
PL2           -2.40 dB
PL12          15.10 dB
PL13          18.10 dB
SFO2          400.1516010 MHz
SI            32768
SF            100.6178021 MHz
WDW           EM
SSB           0
LB            3.00 Hz
GB            0
PC            1.00

```

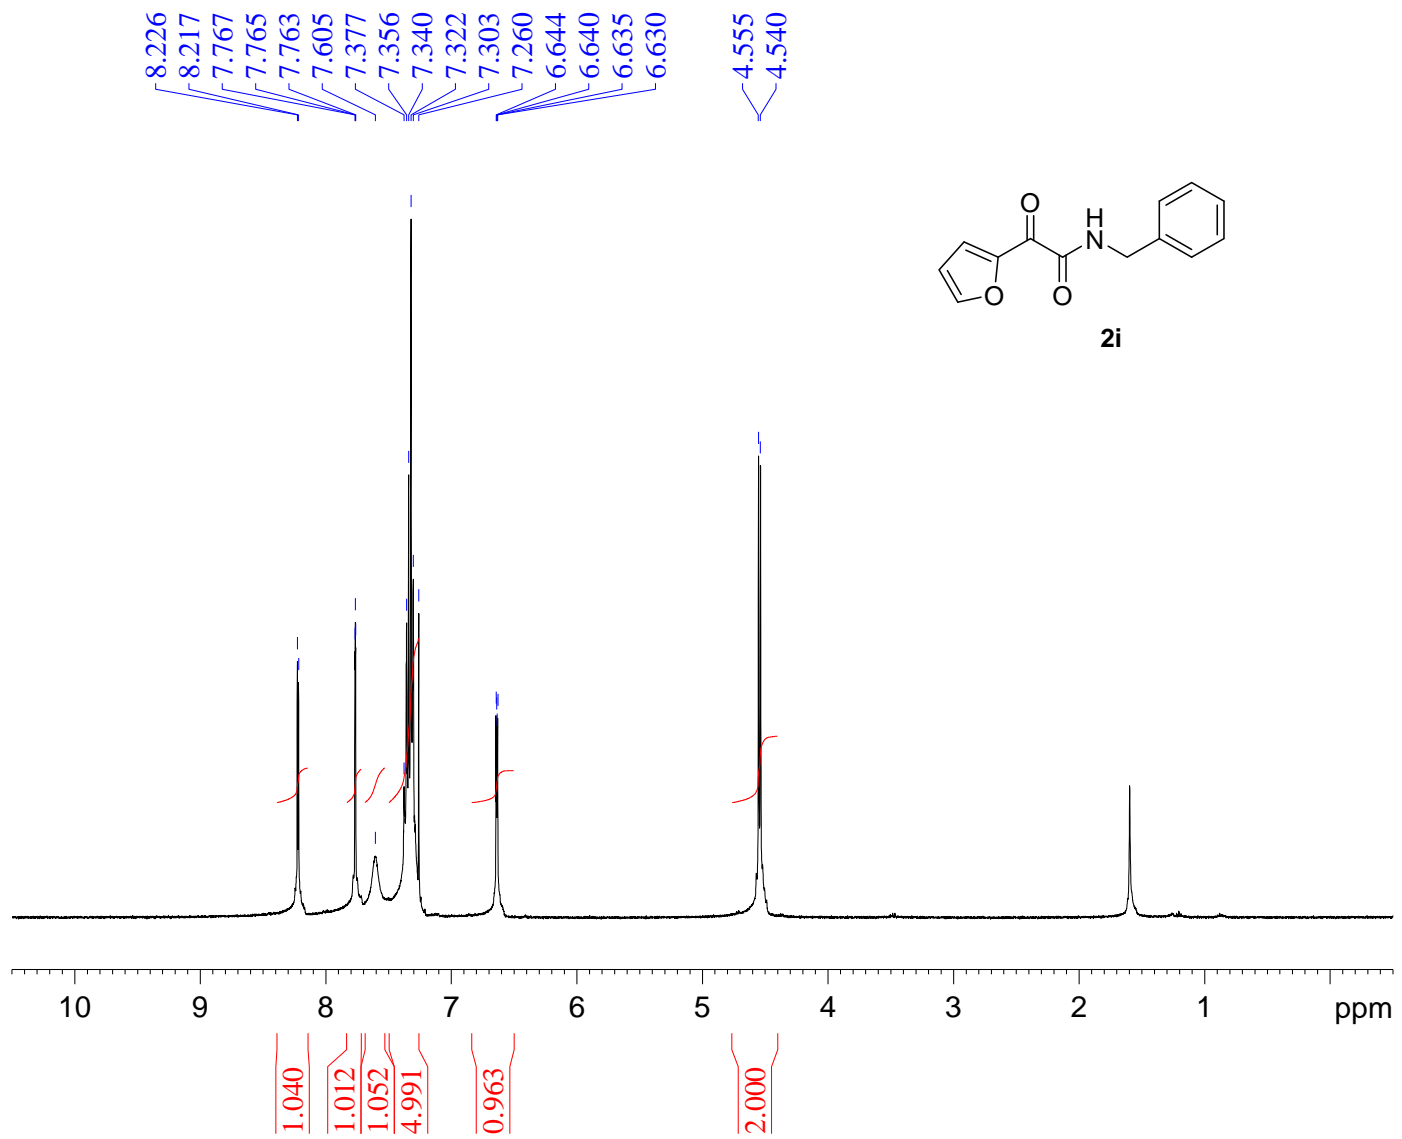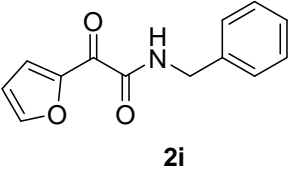

NAME 20151116  
 EXPNO 3  
 PROCNO 1  
 Date\_ 20151117  
 Time 20.12  
 INSTRUM spect  
 PROBHD 5 mm DUL 13C-1  
 PULPROG zg30  
 TD 32768  
 SOLVENT CDCl3  
 NS 32  
 DS 0  
 SWH 6410.256 Hz  
 FIDRES 0.195625 Hz  
 AQ 2.5559540 sec  
 RG 4  
 DW 78.000 usec  
 DE 6.00 usec  
 TE 300.0 K  
 D1 2.00000000 sec  
 TD0 1

===== CHANNEL f1 =====  
 NUC1 1H  
 P1 10.00 usec  
 PL1 -2.40 dB  
 SFO1 400.1528010 MHz  
 SI 16384  
 SF 400.1500092 MHz  
 WDW EM  
 SSB 0  
 LB 0.00 Hz  
 GB 0  
 PC 1.00

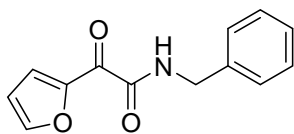

2i

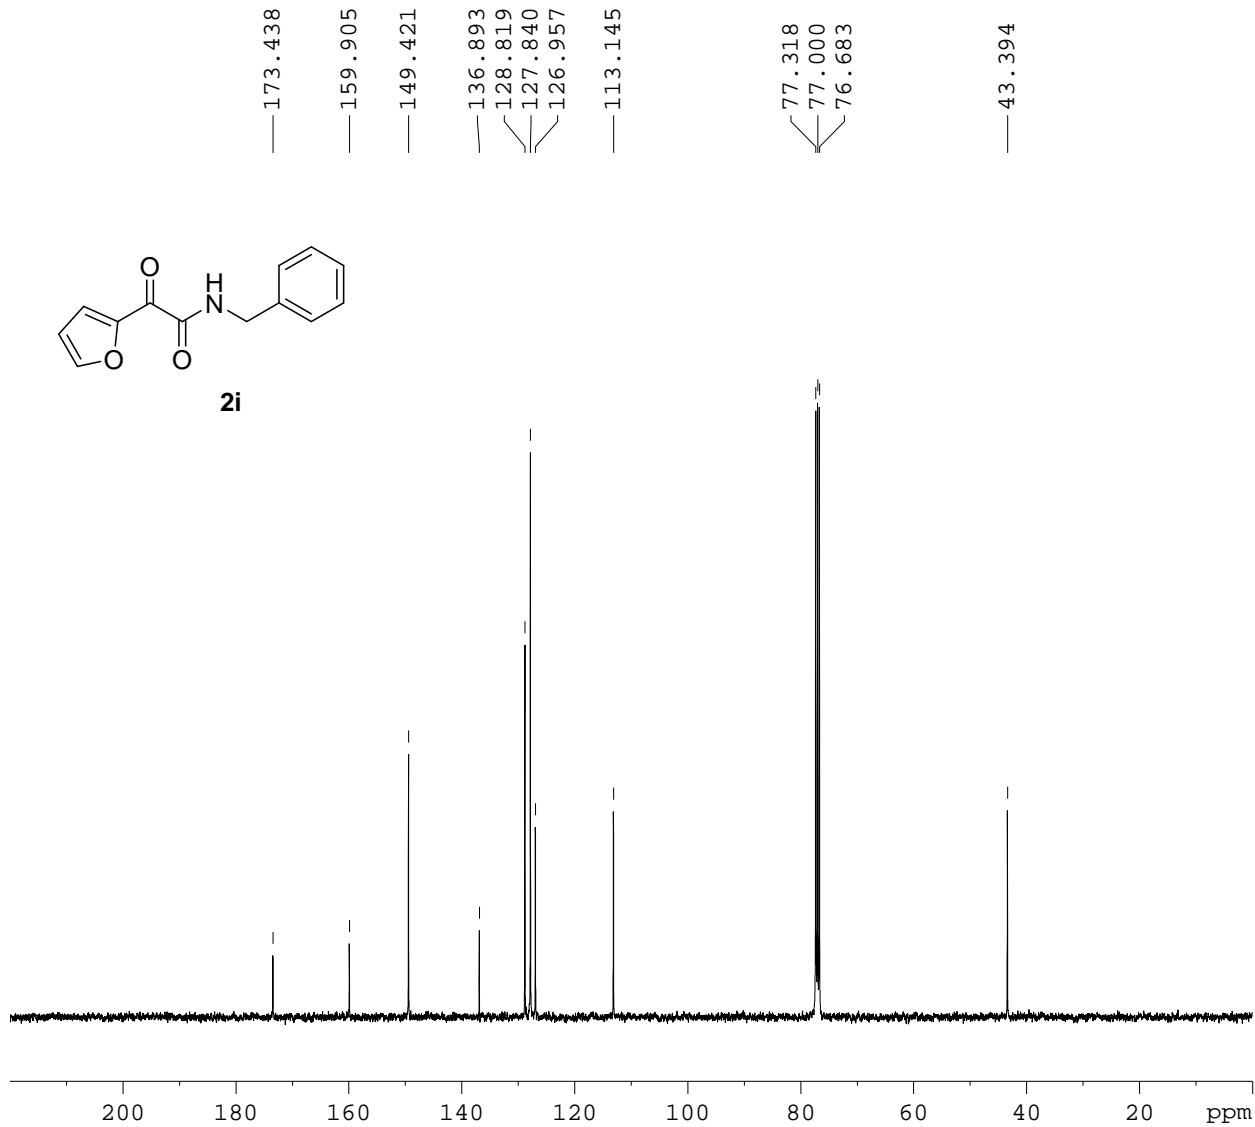

```

NAME          20151116
EXPNO         4
PROCNO        1
Date_         20151117
Time          20.18
INSTRUM       spect
PROBHD        5 mm DUL 13C-1
PULPROG       zgpg30
TD            65536
SOLVENT       CDC13
NS            656
DS            0
SWH           22727.273 Hz
FIDRES        0.346791 Hz
AQ            1.4418420 sec
RG            57
DW            22.000 usec
DE            6.00 usec
TE            300.0 K
D1            2.00000000 sec
d11           0.03000000 sec
DELTA         1.89999998 sec
TD0           1

===== CHANNEL f1 =====
NUC1          13C
P1            9.70 usec
PL1           -0.50 dB
SFO1         100.6288660 MHz

===== CHANNEL f2 =====
CPDPRG2       waltz16
NUC2          1H
PCPD2         90.00 usec
PL2           -2.40 dB
PL12          15.10 dB
PL13          18.10 dB
SFO2         400.1516010 MHz
SI            32768
SF            100.6178023 MHz
WDW           EM
SSB           0
LB            3.00 Hz
GB            0
PC            1.00
  
```

7.388  
7.384  
7.349  
7.345  
7.341  
7.328  
7.324  
7.310  
7.295  
7.291  
7.278  
7.260  
7.246  
7.242  
7.225  
6.709  
6.391  
6.383  
6.357  
6.352  
6.349  
6.344  
5.140  
4.535  
4.520  
4.498  
4.484  
4.471  
4.449  
4.434  
3.849

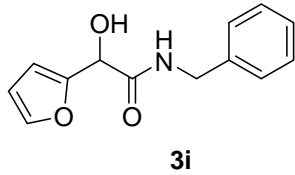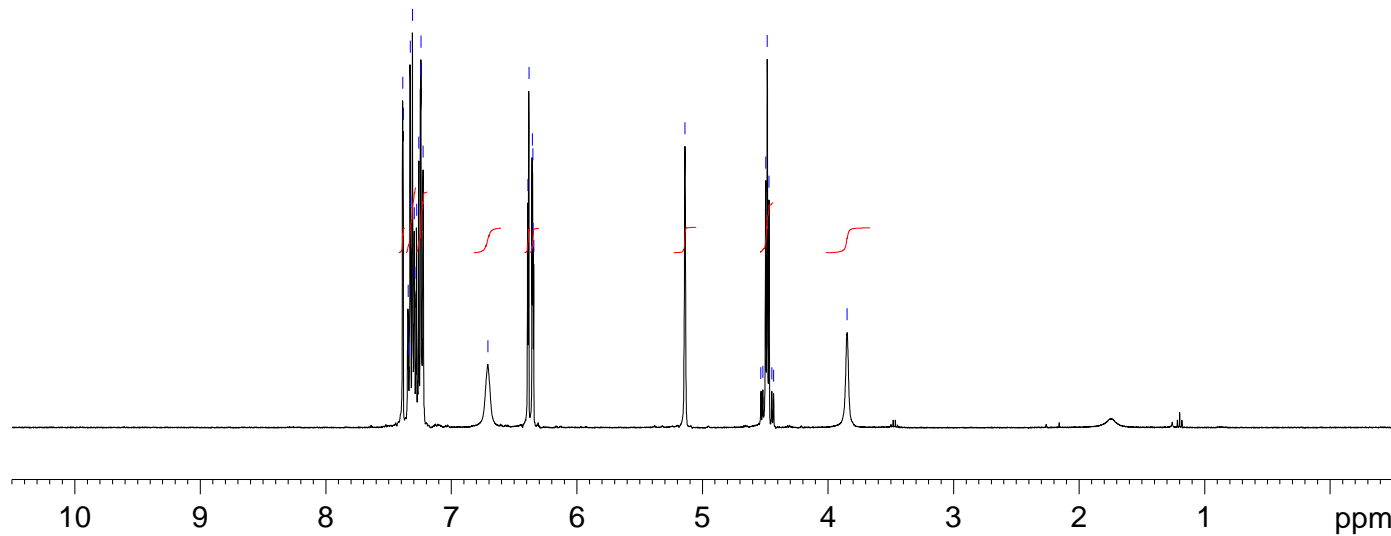

1.000  
2.634  
2.438  
0.993  
0.988  
0.986  
1.018  
2.012  
1.001

NAME 20160216  
EXPNO 3  
PROCNO 1  
Date\_ 20150608  
Time 18.28  
INSTRUM spect  
PROBHD 5 mm DUL 13C-1  
PULPROG zg30  
TD 32768  
SOLVENT CDCl3  
NS 31  
DS 0  
SWH 6410.256 Hz  
FIDRES 0.195625 Hz  
AQ 2.5559540 sec  
RG 4  
DW 78.000 usec  
DE 6.00 usec  
TE 300.0 K  
D1 2.00000000 sec  
TD0 1

===== CHANNEL f1 =====  
NUC1 1H  
P1 10.00 usec  
PL1 -2.40 dB  
SFO1 400.1528010 MHz  
SI 16384  
SF 400.1500088 MHz  
WDW EM  
SSB 0  
LB 0.00 Hz  
GB 0  
PC 1.00

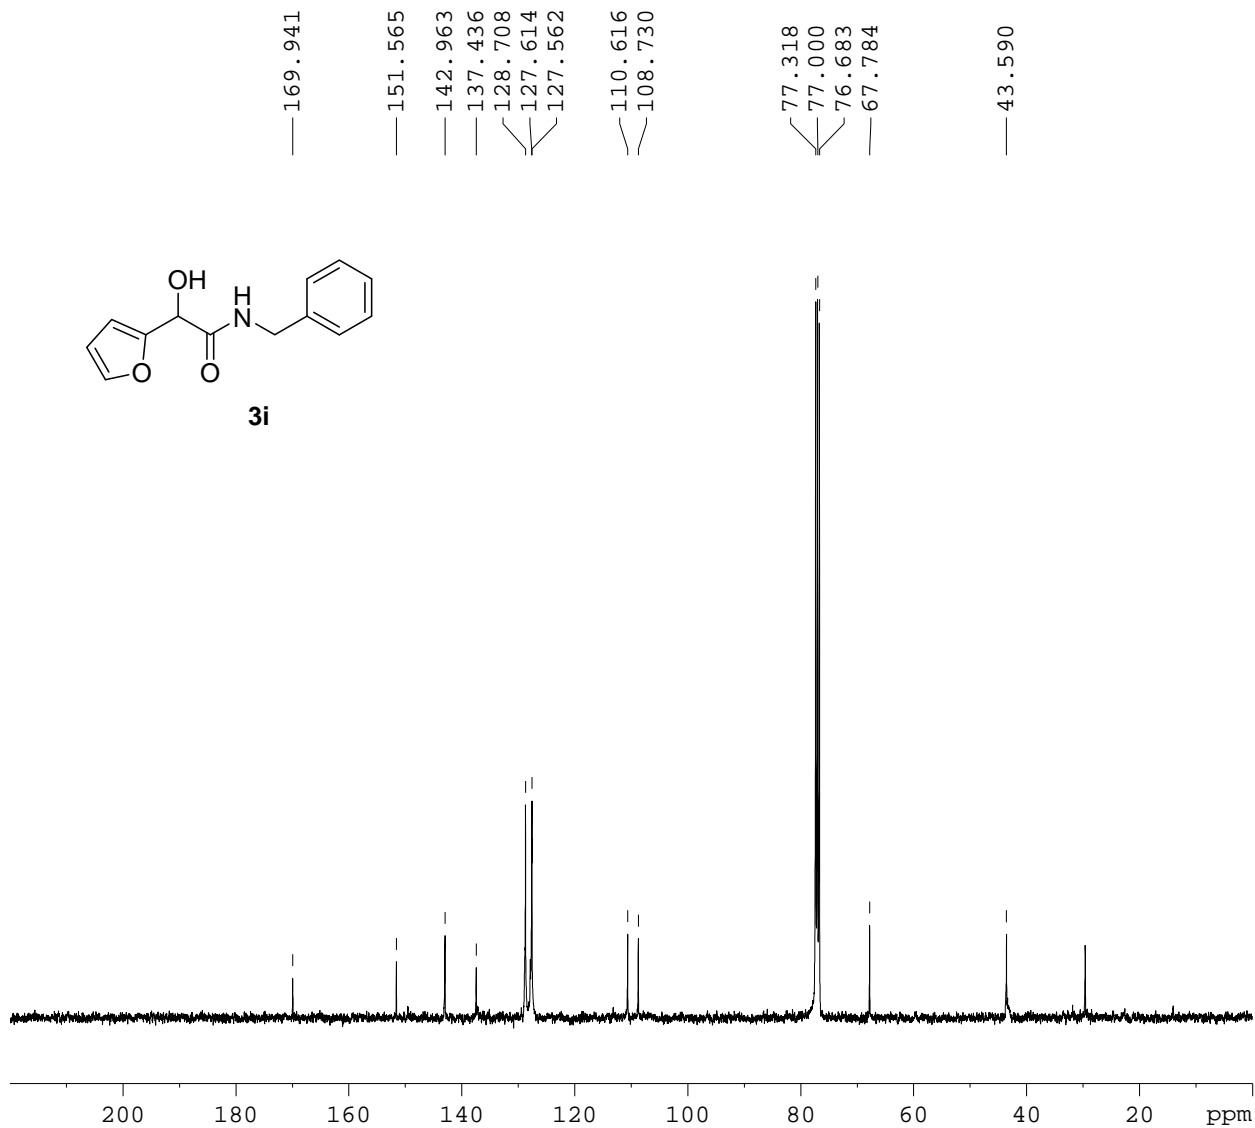

```

NAME          20160216
EXPNO         1
PROCNO        1
Date_         20160216
Time          18.59
INSTRUM       spect
PROBHD        5 mm DUL 13C-1
PULPROG       zgpg30
TD            65536
SOLVENT       CDC13
NS            960
DS            0
SWH           22727.273 Hz
FIDRES        0.346791 Hz
AQ            1.4418420 sec
RG            57
DW            22.000 usec
DE            6.00 usec
TE            300.0 K
D1            2.00000000 sec
d11           0.03000000 sec
DELTA         1.899999998 sec
TD0           1

```

```

===== CHANNEL f1 =====
NUC1          13C
P1            9.70 usec
PL1           -0.50 dB
SFO1         100.6288660 MHz

```

```

===== CHANNEL f2 =====
CPDPRG2      waltz16
NUC2          1H
PCPD2        90.00 usec
PL2           -2.40 dB
PL12         15.10 dB
PL13         18.10 dB
SFO2         400.1516010 MHz
SI           32768
SF           100.6178033 MHz
WDW          EM
SSB          0
LB           3.00 Hz
GB           0
PC           1.00

```

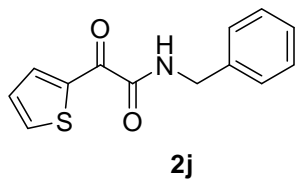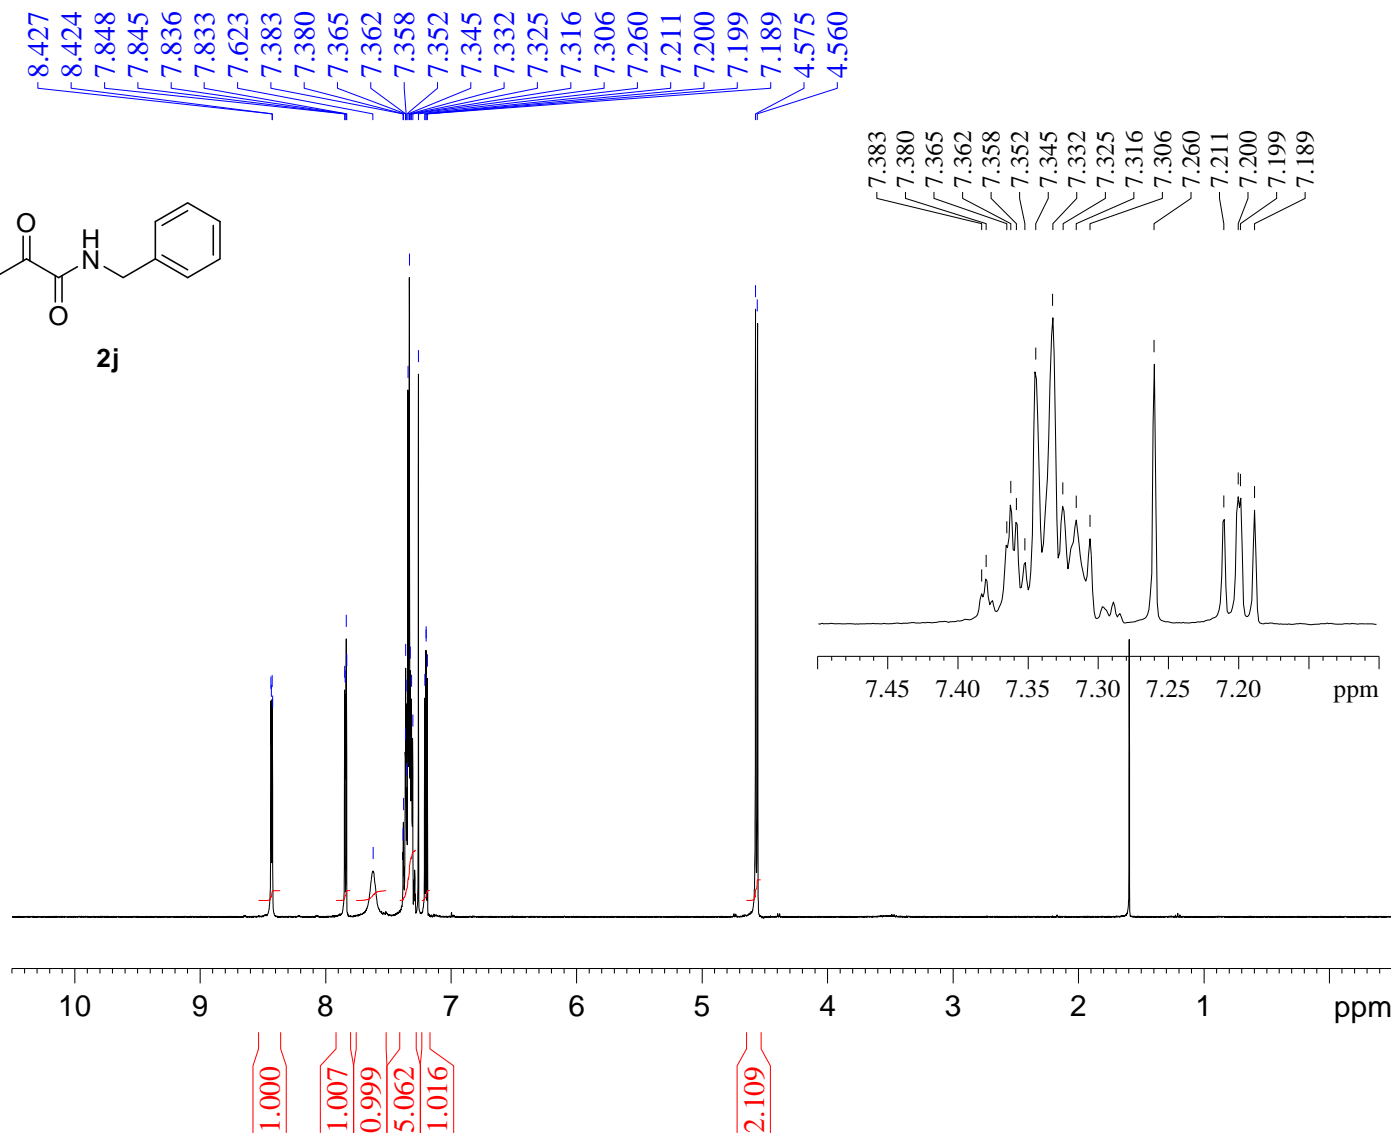

NAME Substrate 1H  
 EXPNO 2  
 PROCNO 1  
 Date\_ 20150530  
 Time 18.10  
 INSTRUM spect  
 PROBHD 5 mm DUL 13C-1  
 PULPROG zg30  
 TD 32768  
 SOLVENT CDCl3  
 NS 32  
 DS 0  
 SWH 6410.256 Hz  
 FIDRES 0.195625 Hz  
 AQ 2.5559540 sec  
 RG 4  
 DW 78.000 usec  
 DE 6.00 usec  
 TE 300.0 K  
 D1 2.00000000 sec  
 TD0 1

===== CHANNEL f1 =====  
 NUC1 1H  
 P1 10.00 usec  
 PL1 -2.40 dB  
 SFO1 400.1528010 MHz  
 SI 16384  
 SF 400.1500088 MHz  
 WDW EM  
 SSB 0  
 LB 0.00 Hz  
 GB 0  
 PC 1.00

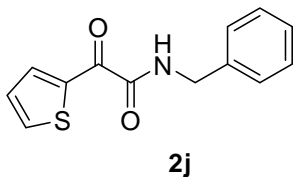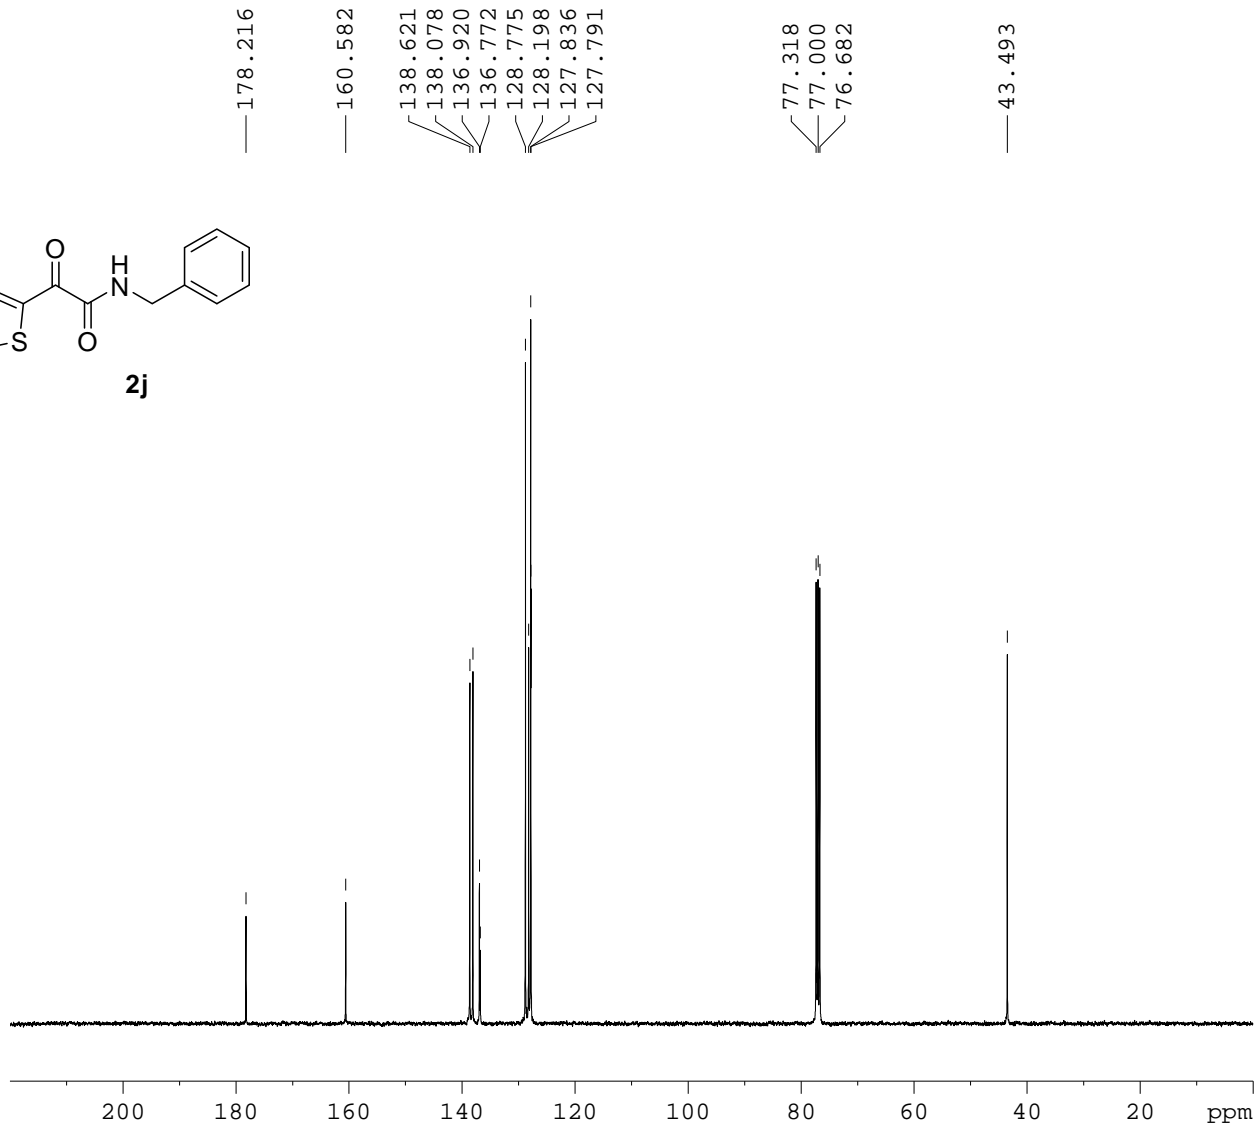

```

NAME      Substrate 13C
EXPNO     2
PROCNO    1
Date_     20150530
Time      18.16
INSTRUM   spect
PROBHD    5 mm DUL 13C-1
PULPROG   zgpg30
TD         65536
SOLVENT   CDC13
NS         1467
DS         0
SWH       22727.273 Hz
FIDRES    0.346791 Hz
AQ         1.4418420 sec
RG         57
DW         22.000 usec
DE         6.00 usec
TE         300.0 K
D1         2.00000000 sec
d11        0.03000000 sec
DELTA     1.899999998 sec
TD0        1

===== CHANNEL f1 =====
NUC1       13C
P1         9.70 usec
PL1        -0.50 dB
SFO1       100.6288660 MHz

===== CHANNEL f2 =====
CPDPRG2    waltz16
NUC2       1H
PCPD2      90.00 usec
PL2         -2.40 dB
PL12        15.10 dB
PL13        18.10 dB
SFO2       400.1516010 MHz
SI         32768
SF         100.6178066 MHz
WDW         EM
SSB         0
LB          3.00 Hz
GB          0
PC          1.00

```

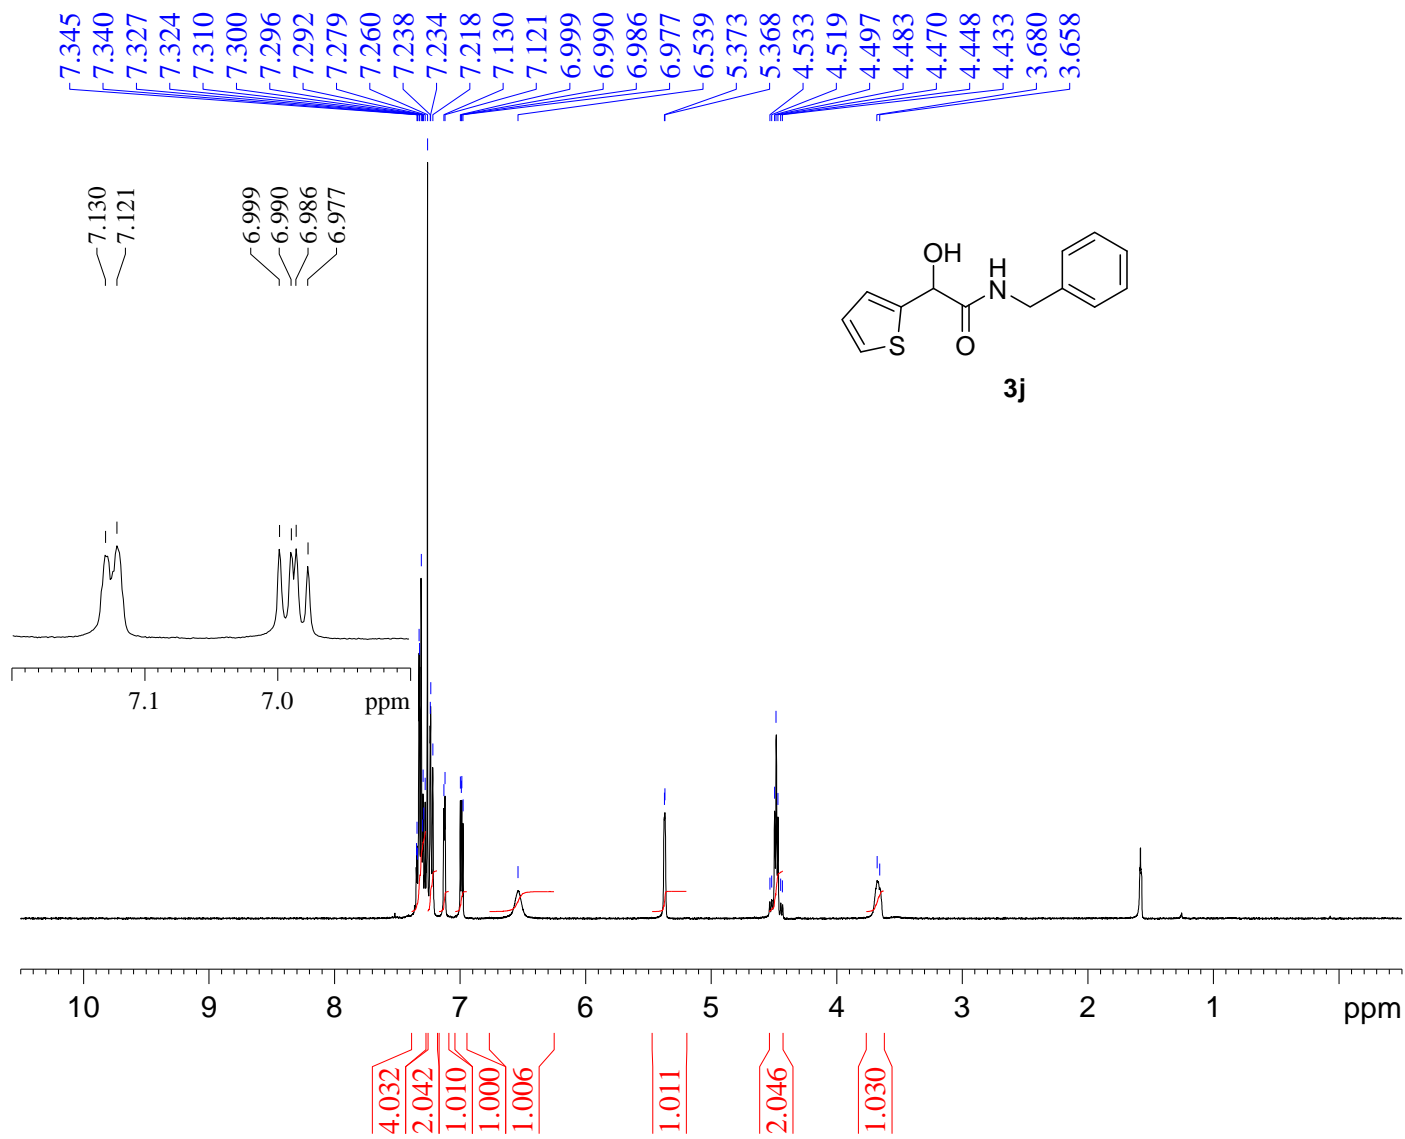

NAME Substrate 1H  
 EXPNO 3  
 PROCNO 1  
 Date\_ 20150607  
 Time 16.32  
 INSTRUM spect  
 PROBHD 5 mm DUL 13C-1  
 PULPROG zg30  
 TD 32768  
 SOLVENT CDCl3  
 NS 48  
 DS 0  
 SWH 6410.256 Hz  
 FIDRES 0.195625 Hz  
 AQ 2.5559540 sec  
 RG 4  
 DW 78.000 usec  
 DE 6.00 usec  
 TE 300.0 K  
 D1 2.00000000 sec  
 TD0 1

===== CHANNEL f1 =====  
 NUC1 1H  
 P1 10.00 usec  
 PL1 -2.40 dB  
 SFO1 400.1528010 MHz  
 SI 16384  
 SF 400.1500088 MHz  
 WDW EM  
 SSB 0  
 LB 0.00 Hz  
 GB 0  
 PC 1.00



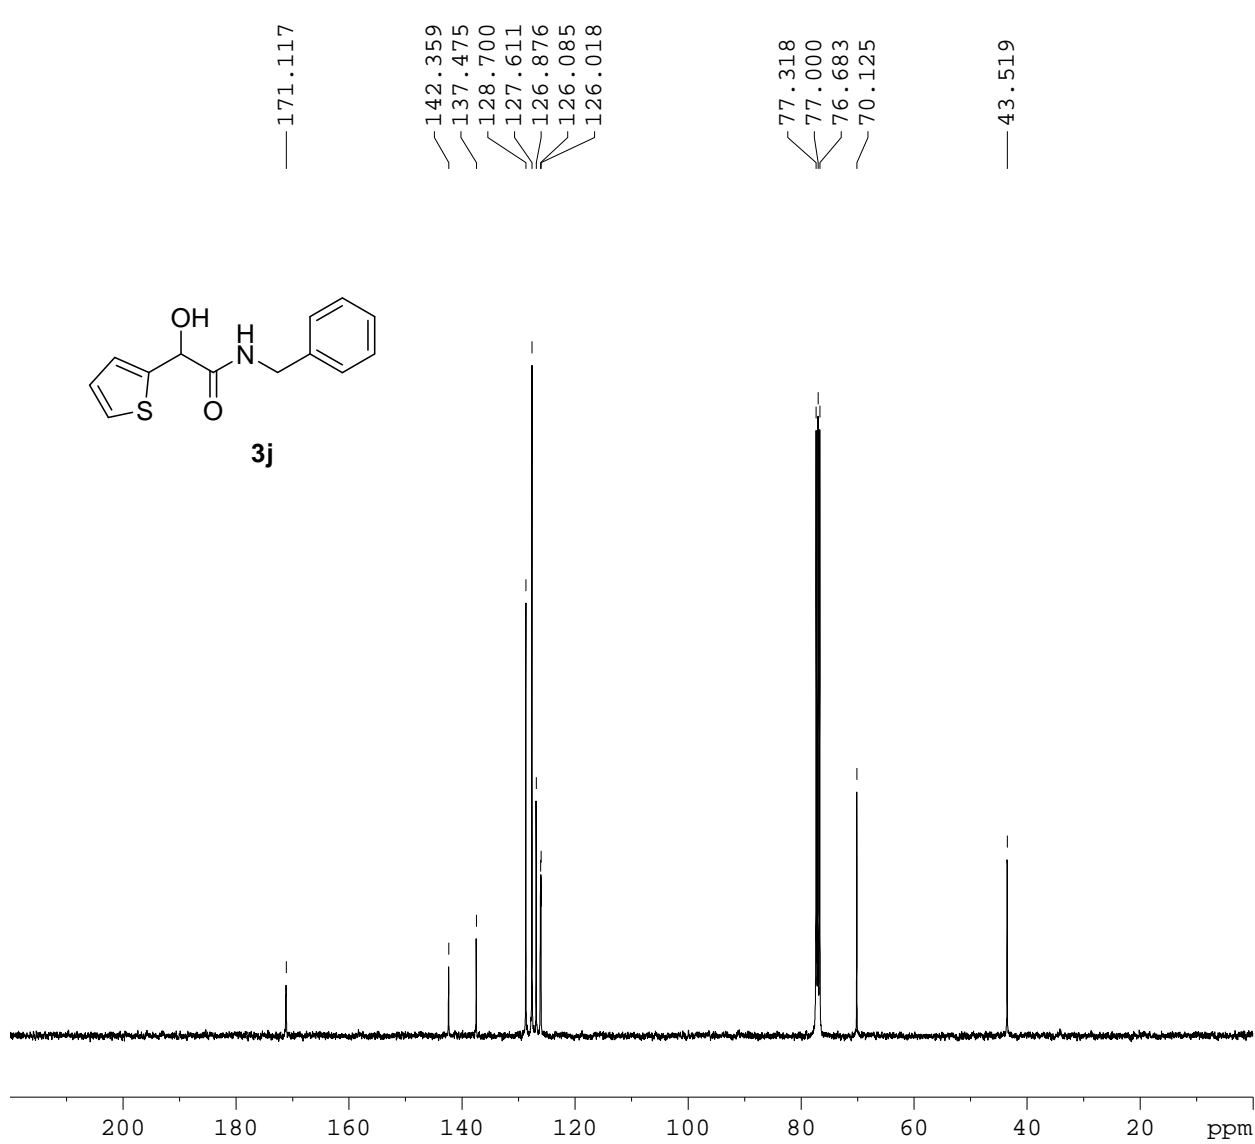

```

NAME      Substrate 13C
EXPNO     3
PROCNO    1
Date_     20150607
Time      16.40
INSTRUM   spect
PROBHD    5 mm DUL 13C-1
PULPROG   zgpg30
TD         65536
SOLVENT   CDC13
NS         1284
DS         0
SWH       22727.273 Hz
FIDRES    0.346791 Hz
AQ        1.4418420 sec
RG         57
DW        22.000 usec
DE         6.00 usec
TE        300.0 K
D1        2.00000000 sec
d11       0.03000000 sec
DELTA     1.89999998 sec
TD0       1

===== CHANNEL f1 =====
NUC1      13C
P1        9.70 usec
PL1       -0.50 dB
SFO1     100.6288660 MHz

===== CHANNEL f2 =====
CPDPRG2   waltz16
NUC2      1H
PCPD2     90.00 usec
PL2       -2.40 dB
PL12      15.10 dB
PL13      18.10 dB
SFO2     400.1516010 MHz
SI        32768
SF        100.6178029 MHz
WDW       EM
SSB       0
LB        3.00 Hz
GB        0
PC        1.00

```

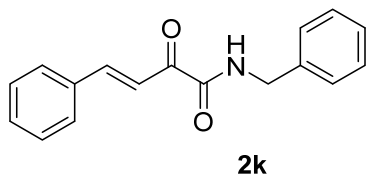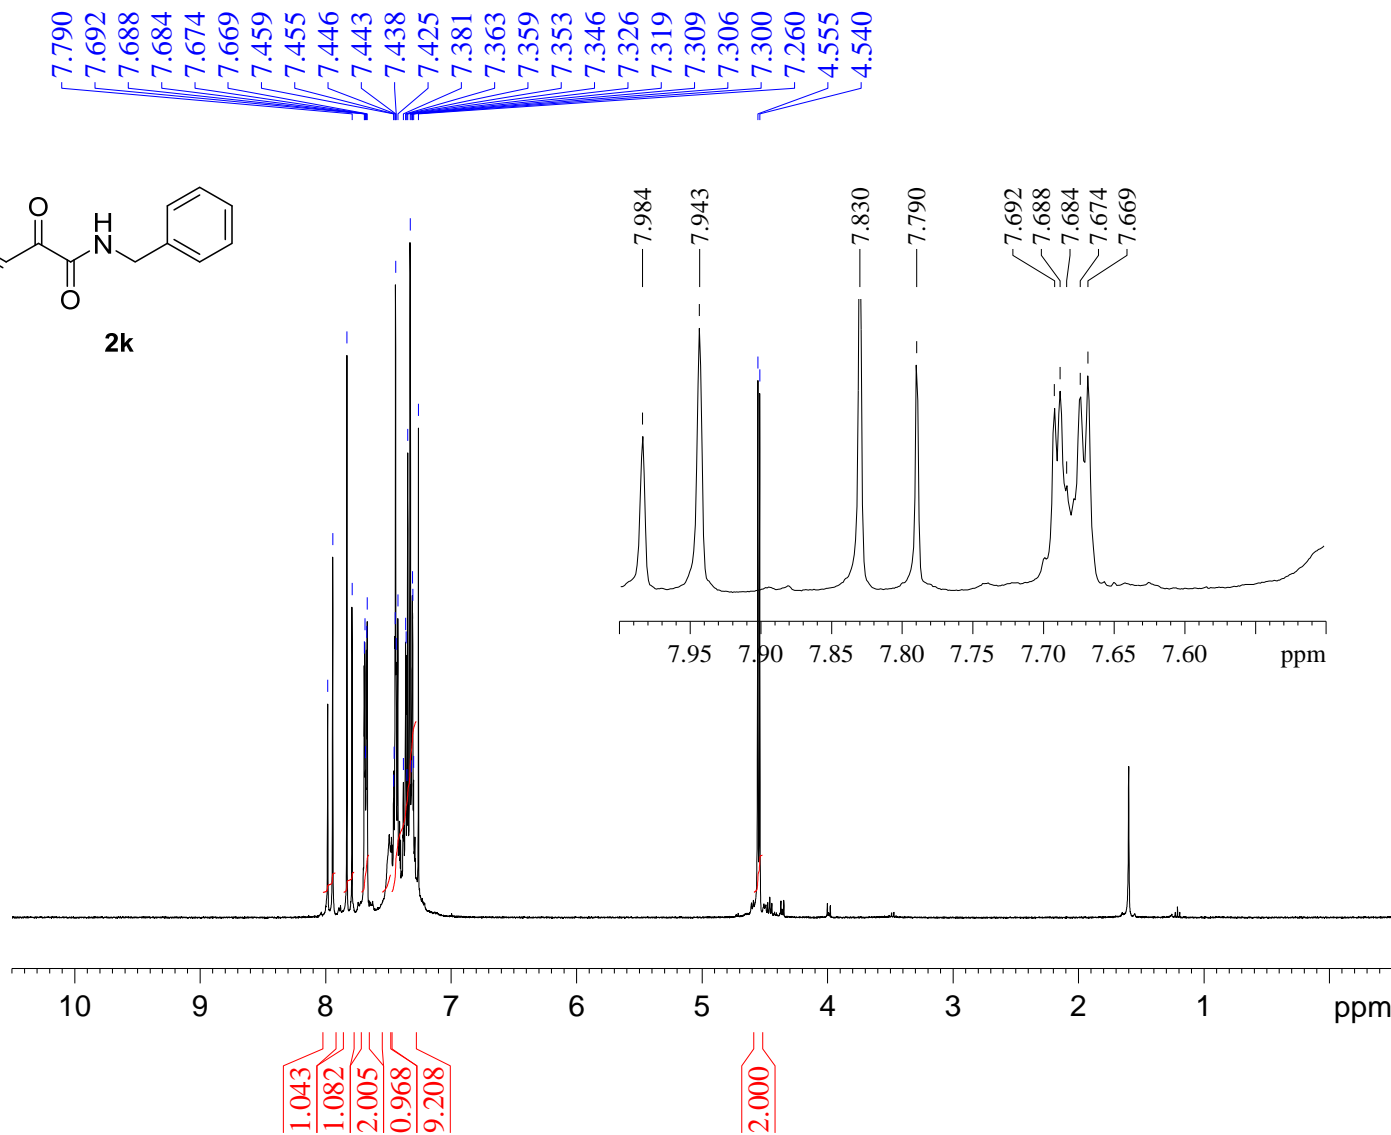

NAME Substrate 1H  
 EXPNO 15  
 PROCNO 1  
 Date\_ 20150727  
 Time 20.20  
 INSTRUM spect  
 PROBHD 5 mm DUL 13C-1  
 PULPROG zg30  
 TD 32768  
 SOLVENT CDCl3  
 NS 49  
 DS 0  
 SWH 6410.256 Hz  
 FIDRES 0.195625 Hz  
 AQ 2.5559540 sec  
 RG 4  
 DW 78.000 usec  
 DE 6.00 usec  
 TE 300.0 K  
 D1 2.00000000 sec  
 TD0 1

===== CHANNEL f1 =====  
 NUC1 1H  
 P1 10.00 usec  
 PL1 -2.40 dB  
 SFO1 400.1528010 MHz  
 SI 16384  
 SF 400.1500088 MHz  
 WDW EM  
 SSB 0  
 LB 0.00 Hz  
 GB 0  
 PC 1.00

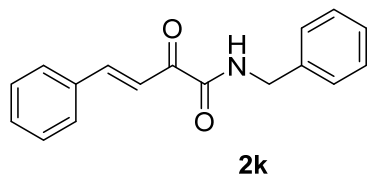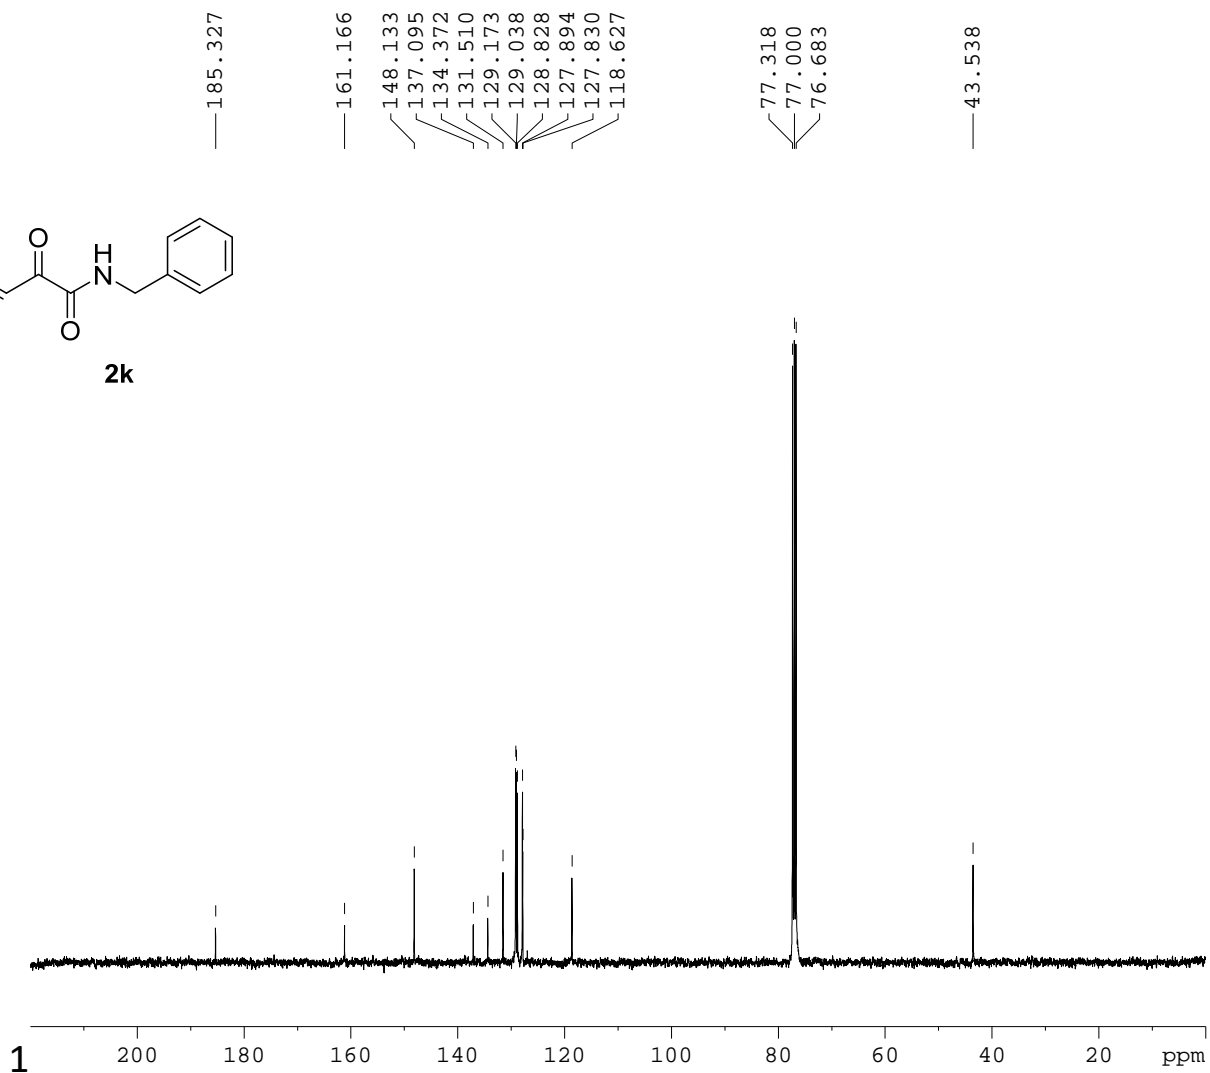

— 185.327

— 161.166

148.133

137.095

134.372

131.510

129.173

129.038

128.828

127.894

127.830

118.627

77.318

77.000

76.683

— 43.538

```

NAME      Substrate 13C
EXPNO     15
PROCNO    1
Date_     20150727
Time      20.26
INSTRUM   spect
PROBHD    5 mm DUL 13C-1
PULPROG   zgpg30
TD         65536
SOLVENT   CDCl3
NS         661
DS         0
SWH       22727.273 Hz
FIDRES    0.346791 Hz
AQ         1.4418420 sec
RG         57
DW         22.000 usec
DE         6.00 usec
TE         300.0 K
D1         2.00000000 sec
d11        0.03000000 sec
DELTA     1.89999998 sec
TD0        1

===== CHANNEL f1 =====
NUC1      13C
P1        9.70 usec
PL1       -0.50 dB
SFO1     100.6288660 MHz

===== CHANNEL f2 =====
CPDPRG2   waltz16
NUC2      1H
PCPD2     90.00 usec
PL2       -2.40 dB
PL12      15.10 dB
PL13      18.10 dB
SFO2     400.1516010 MHz
SI        32768
SF        100.6178002 MHz
WDW       EM
SSB       0
LB        3.00 Hz
GB        0
PC        1.00

```

7.403  
7.398  
7.386  
7.361  
7.356  
7.353  
7.348  
7.344  
7.338  
7.333  
7.327  
7.322  
7.308  
7.303  
7.300  
7.287  
7.270  
7.267  
7.260  
6.779  
6.739  
6.549  
6.344  
6.327  
6.305  
6.287  
4.786  
4.768  
4.553  
4.538  
4.516  
4.501  
4.495  
4.481  
4.458  
4.444  
3.192

NAME Substrate 1H  
EXPNO 16  
PROCNO 1  
Date\_ 20150729  
Time 20.09  
INSTRUM spect  
PROBHD 5 mm DUL 13C-1  
PULPROG zg30  
TD 32768  
SOLVENT CDC13  
NS 100  
DS 0  
SWH 6410.256 Hz  
FIDRES 0.195625 Hz  
AQ 2.5559540 sec  
RG 4  
DW 78.000 usec  
DE 6.00 usec  
TE 300.0 K  
D1 2.00000000 sec  
TD0 1

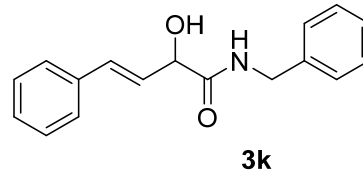

===== CHANNEL f1 =====  
NUC1 1H  
P1 10.00 usec  
PL1 -2.40 dB  
SFO1 400.1528010 MHz  
SI 16384  
SF 400.1500088 MHz  
WDW EM  
SSB 0  
LB 0.00 Hz  
GB 0  
PC 1.00

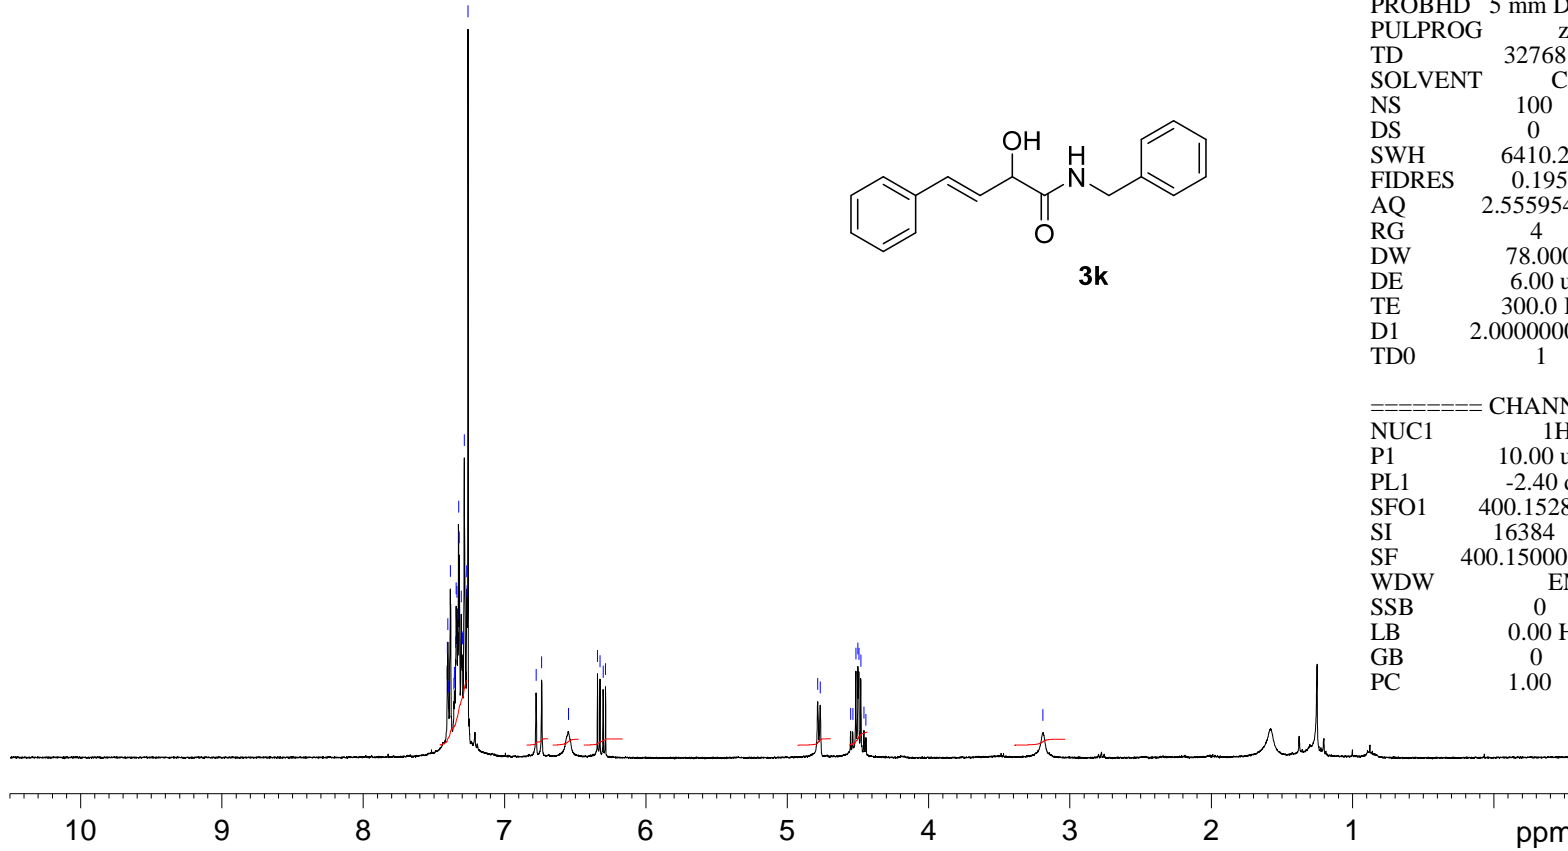

10.105  
1.004  
0.932  
0.959  
1.000  
2.016  
0.916

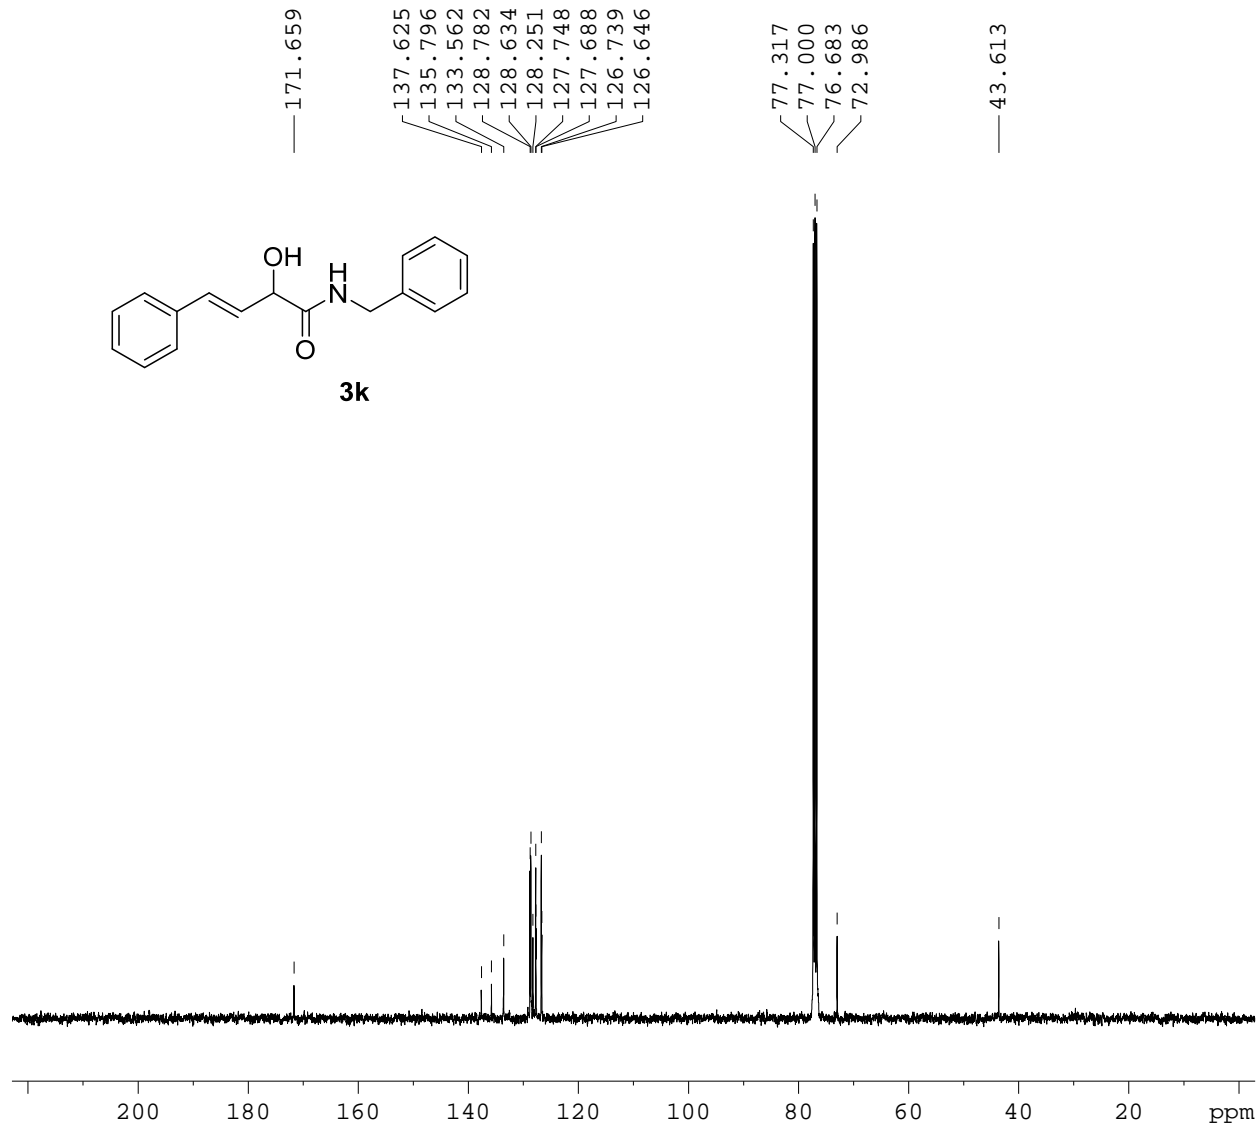

```

NAME      Substrate 13C
EXPNO     16
PROCNO    1
Date_     20150729
Time      20.20
INSTRUM   spect
PROBHD    5 mm DUL 13C-1
PULPROG   zgpg30
TD         65536
SOLVENT   CDC13
NS         723
DS         0
SWH        22727.273 Hz
FIDRES     0.346791 Hz
AQ         1.4418420 sec
RG         57
DW         22.000 usec
DE         6.00 usec
TE         300.0 K
D1         2.00000000 sec
d11        0.03000000 sec
DELTA     1.89999998 sec
TD0        1

```

```

===== CHANNEL f1 =====
NUC1      13C
P1        9.70 usec
PL1       -0.50 dB
SFO1     100.6288660 MHz

```

```

===== CHANNEL f2 =====
CPDPRG2   waltz16
NUC2       1H
PCPD2     90.00 usec
PL2        -2.40 dB
PL12       15.10 dB
PL13       18.10 dB
SFO2     400.1516010 MHz
SI         32768
SF        100.6178001 MHz
WDW        EM
SSB         0
LB          3.00 Hz
GB          0
PC          1.00

```

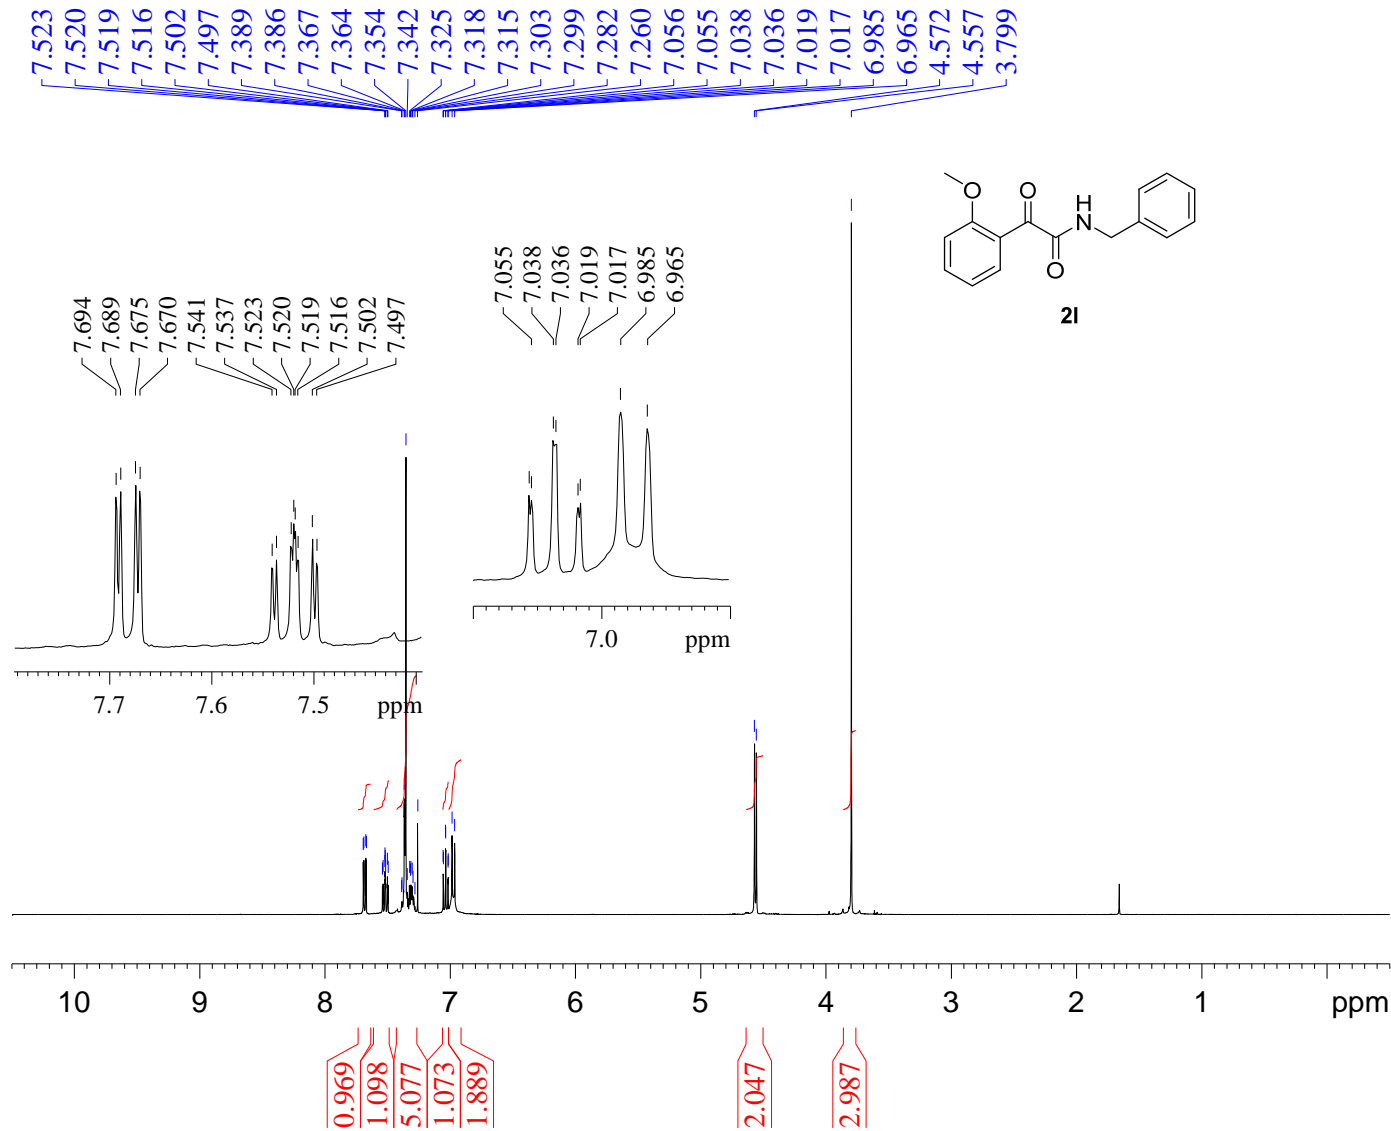

NAME Substrate 1H  
 EXPNO 10  
 PROCNO 1  
 Date\_ 20150719  
 Time 14.05  
 INSTRUM spect  
 PROBHD 5 mm DUL 13C-1  
 PULPROG zg30  
 TD 32768  
 SOLVENT CDCl3  
 NS 32  
 DS 0  
 SWH 6410.256 Hz  
 FIDRES 0.195625 Hz  
 AQ 2.5559540 sec  
 RG 4  
 DW 78.000 usec  
 DE 6.00 usec  
 TE 300.0 K  
 D1 2.00000000 sec  
 TD0 1

===== CHANNEL f1 =====  
 NUC1 1H  
 P1 10.00 usec  
 PL1 -2.40 dB  
 SFO1 400.1528010 MHz  
 SI 16384  
 SF 400.1500088 MHz  
 WDW EM  
 SSB 0  
 LB 0.00 Hz  
 GB 0  
 PC 1.00

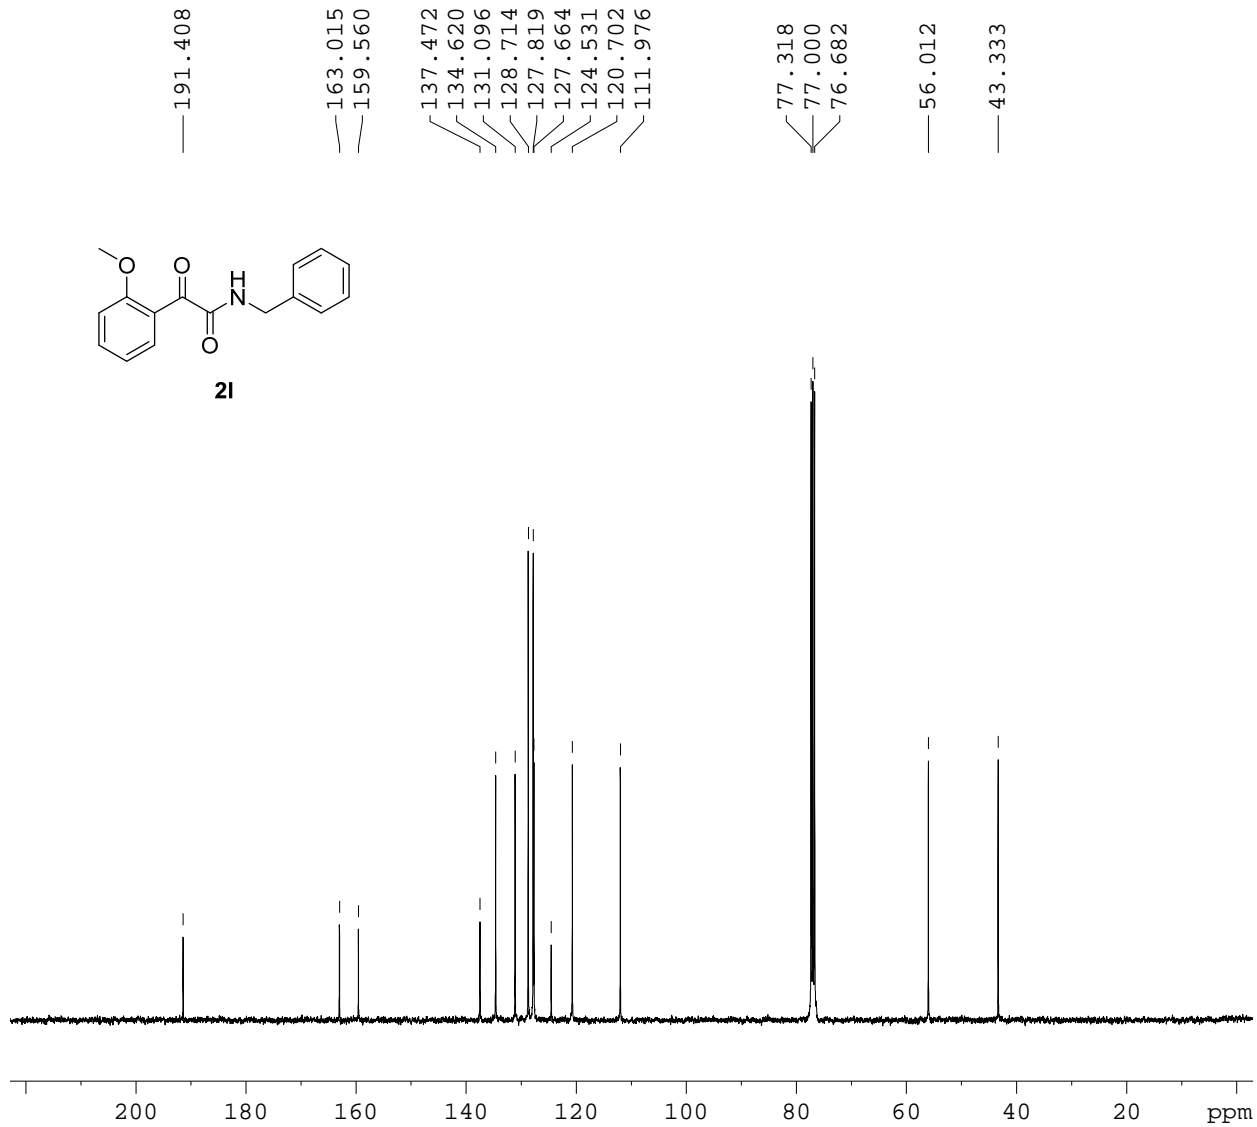

```

NAME      Substrate 13C
EXPNO     10
PROCNO    1
Date_     20150719
Time      14.09
INSTRUM   spect
PROBHD    5 mm DUL 13C-1
PULPROG   zgpg30
TD         65536
SOLVENT   CDC13
NS         1239
DS         0
SWH       22727.273 Hz
FIDRES    0.346791 Hz
AQ         1.4418420 sec
RG         57
DW         22.000 usec
DE         6.00 usec
TE         300.0 K
D1         2.00000000 sec
d11        0.03000000 sec
DELTA     1.89999998 sec
TD0        1

```

```

===== CHANNEL f1 =====
NUC1      13C
P1        9.70 usec
PL1       -0.50 dB
SFO1     100.6288660 MHz

```

```

===== CHANNEL f2 =====
CPDPRG2   waltz16
NUC2      1H
PCPD2     90.00 usec
PL2       -2.40 dB
PL12      15.10 dB
PL13      18.10 dB
SFO2     400.1516010 MHz
SI        32768
SF        100.6178033 MHz
WDW       EM
SSB       0
LB        3.00 Hz
GB        0
PC        1.00

```

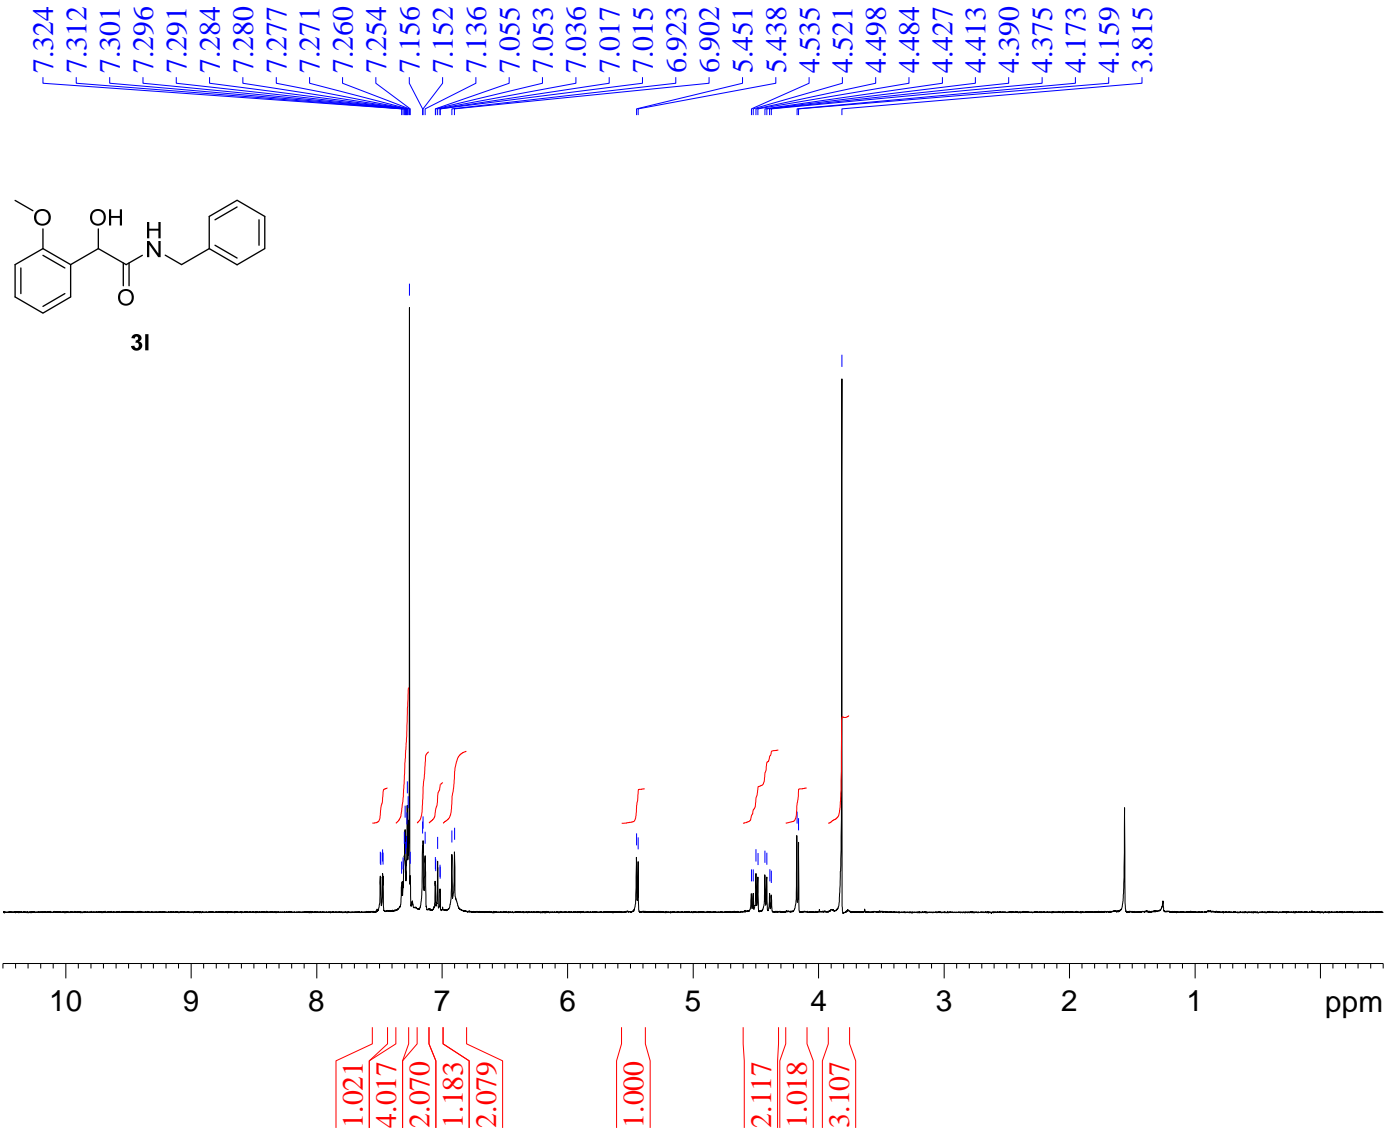

```

NAME      Substrate 1H
EXPNO     9
PROCNO    1
Date_     20150718
Time      12.28
INSTRUM   spect
PROBHD    5 mm DUL 13C-1
PULPROG   zg30
TD        32768
SOLVENT   CDCl3
NS        40
DS        0
SWH       6410.256 Hz
FIDRES    0.195625 Hz
AQ        2.5559540 sec
RG        4
DW        78.000 usec
DE        6.00 usec
TE        300.0 K
D1        2.00000000 sec
TD0       1

===== CHANNEL f1 =====
NUC1      1H
P1        10.00 usec
PL1       -2.40 dB
SFO1     400.1528010 MHz
SI        16384
SF        400.1500088 MHz
WDW       EM
SSB       0
LB        0.00 Hz
GB        0
PC        1.00

```



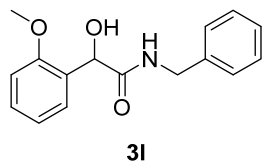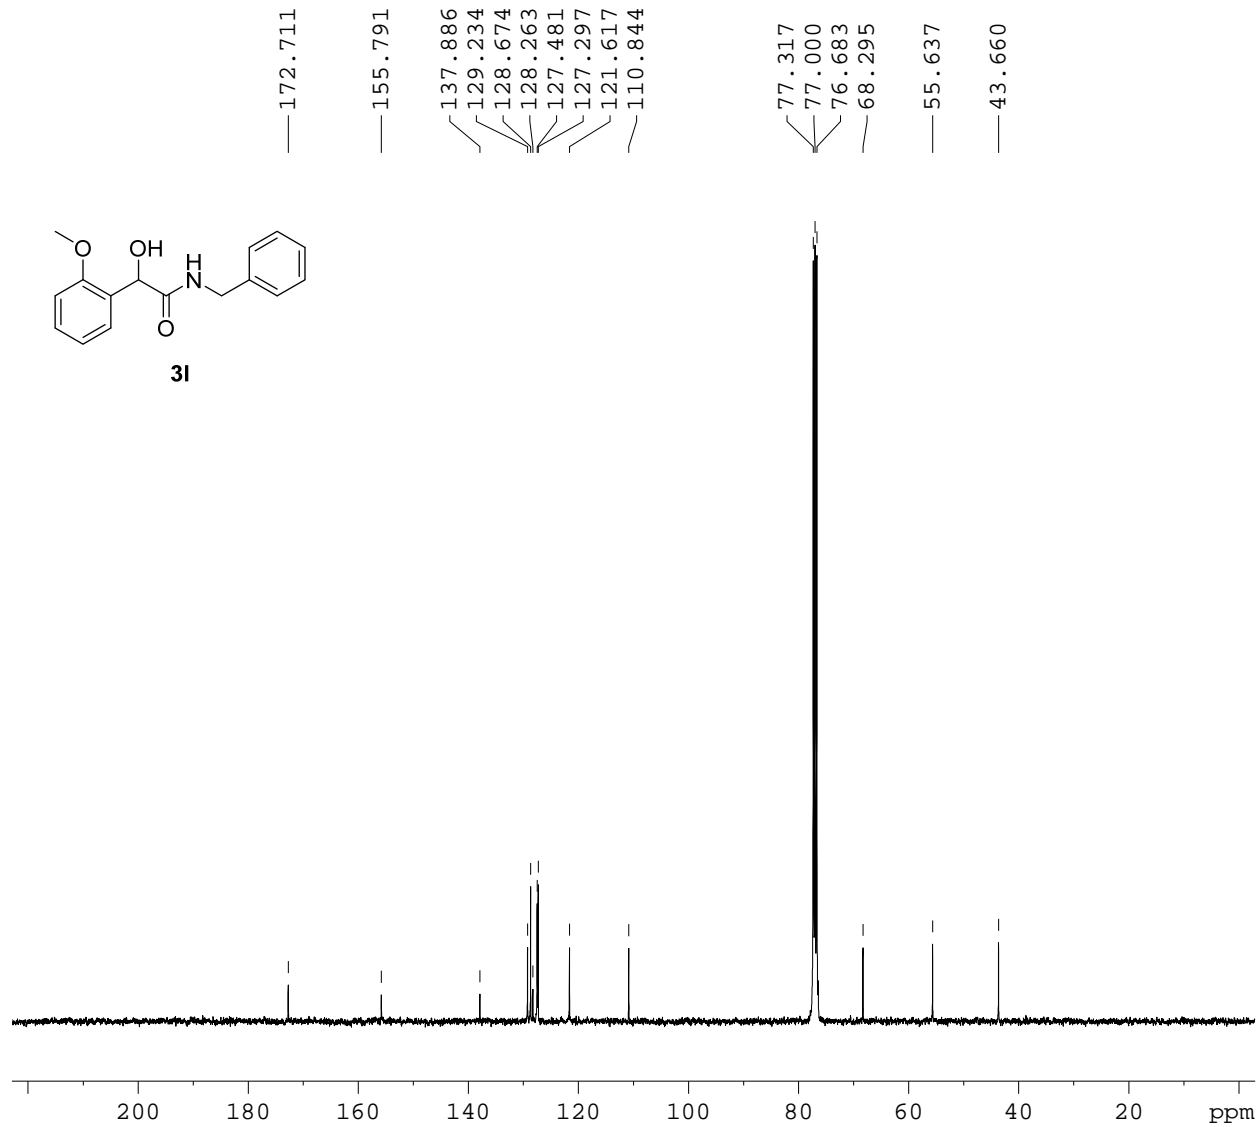

```

NAME      Substrate 13C
EXPNO     9
PROCNO    1
Date_     20150718
Time      12.36
INSTRUM   spect
PROBHD    5 mm DUL 13C-1
PULPROG   zgpg30
TD         65536
SOLVENT   CDC13
NS         2359
DS         0
SWH       22727.273 Hz
FIDRES    0.346791 Hz
AQ         1.4418420 sec
RG         57
DW         22.000 usec
DE         6.00 usec
TE         300.0 K
D1         2.00000000 sec
d11        0.03000000 sec
DELTA     1.89999998 sec
TD0        1

```

```

===== CHANNEL f1 =====
NUC1      13C
P1        9.70 usec
PL1       -0.50 dB
SFO1     100.6288660 MHz

```

```

===== CHANNEL f2 =====
CPDPRG2   waltz16
NUC2      1H
PCPD2     90.00 usec
PL2       -2.40 dB
PL12      15.10 dB
PL13      18.10 dB
SFO2     400.1516010 MHz
SI        32768
SF        100.6177996 MHz
WDW       EM
SSB       0
LB        3.00 Hz
GB        0
PC        1.00

```

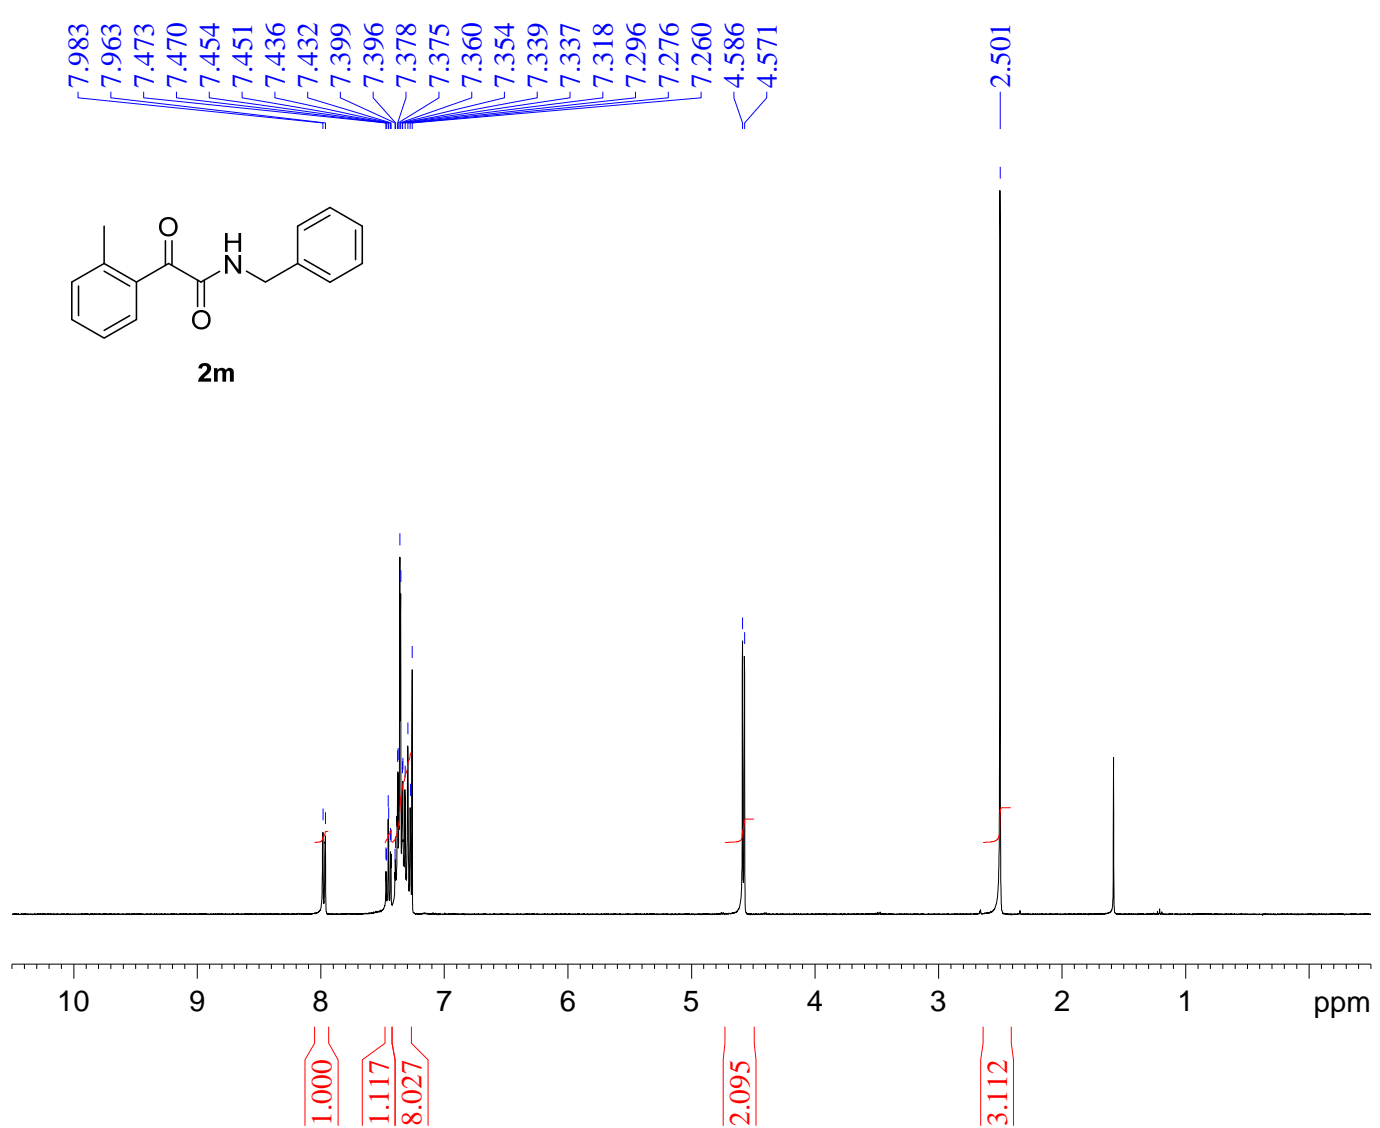

NAME 20151115  
 EXPNO 1  
 PROCNO 1  
 Date\_ 20151115  
 Time 20.05  
 INSTRUM spect  
 PROBHD 5 mm DUL 13C-1  
 PULPROG zg30  
 TD 32768  
 SOLVENT CDC13  
 NS 16  
 DS 0  
 SWH 6410.256 Hz  
 FIDRES 0.195625 Hz  
 AQ 2.5559540 sec  
 RG 4  
 DW 78.000 usec  
 DE 6.00 usec  
 TE 300.0 K  
 D1 2.00000000 sec  
 TD0 1

===== CHANNEL f1 =====  
 NUC1 1H  
 P1 10.00 usec  
 PL1 -2.40 dB  
 SFO1 400.1528010 MHz  
 SI 16384  
 SF 400.1500089 MHz  
 WDW EM  
 SSB 0  
 LB 0.00 Hz  
 GB 0  
 PC 1.00

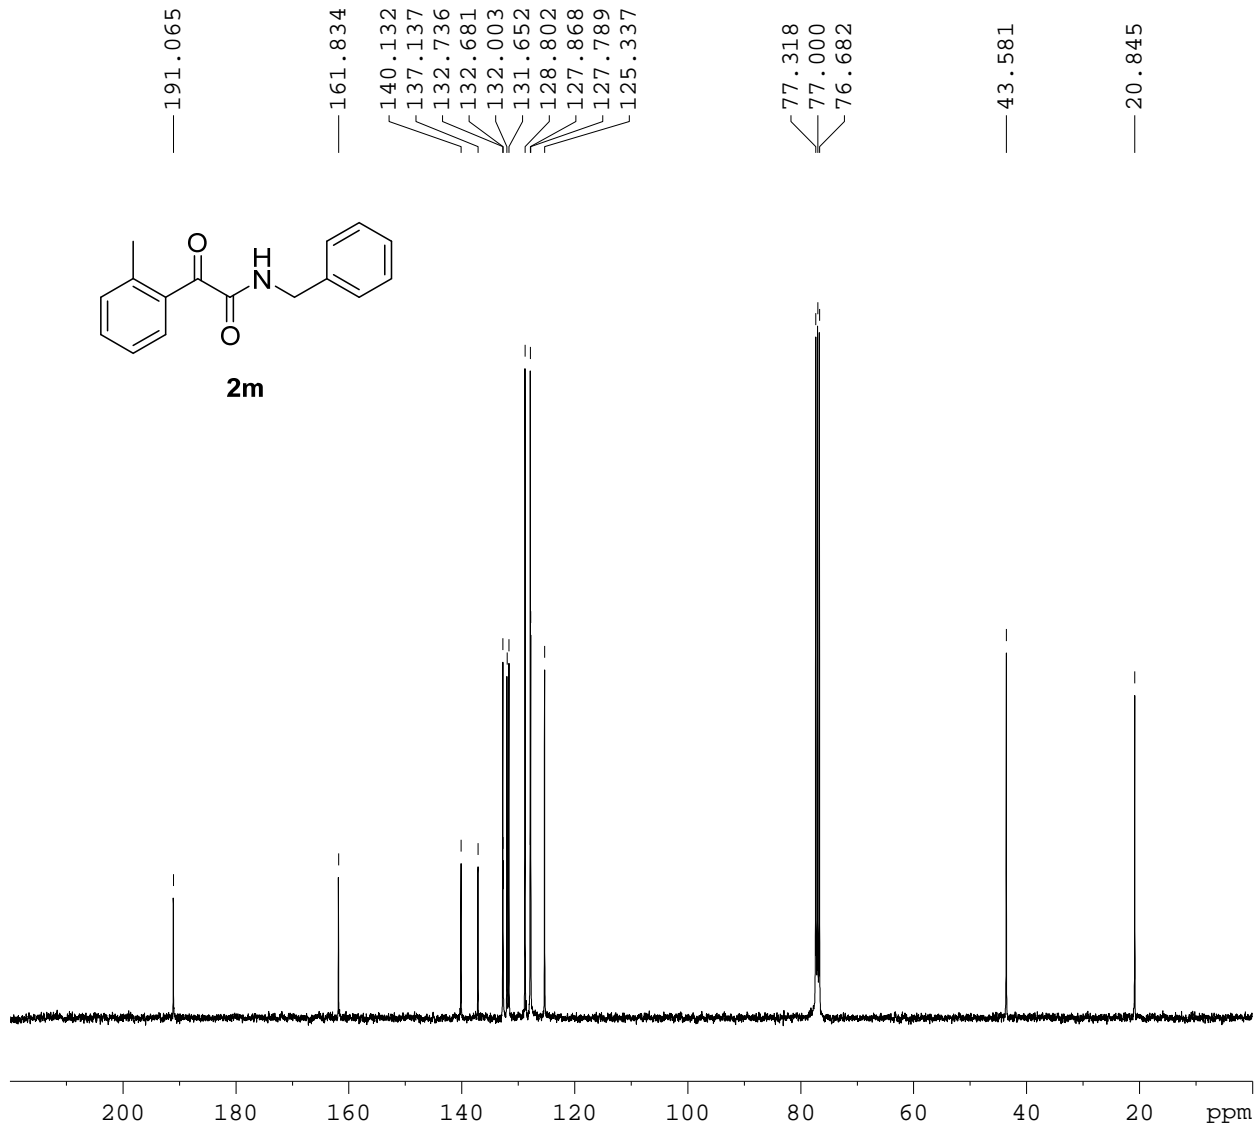

```

NAME                20151115
EXPNO                2
PROCNO              1
Date_               20151115
Time                20.12
INSTRUM             spect
PROBHD              5 mm DUL 13C-1
PULPROG             zgpg30
TD                  65536
SOLVENT             CDC13
NS                  756
DS                  0
SWH                 22727.273 Hz
FIDRES              0.346791 Hz
AQ                  1.4418420 sec
RG                  57
DW                  22.000 usec
DE                  6.00 usec
TE                  300.0 K
D1                  2.00000000 sec
d11                 0.03000000 sec
DELTA               1.899999998 sec
TD0                 1

===== CHANNEL f1 =====
NUC1                 13C
P1                   9.70 usec
PL1                  -0.50 dB
SFO1                 100.6288660 MHz

===== CHANNEL f2 =====
CPDPRG2             waltz16
NUC2                 1H
PCPD2                90.00 usec
PL2                  -2.40 dB
PL12                 15.10 dB
PL13                 18.10 dB
SFO2                 400.1516010 MHz
SI                   32768
SF                   100.6178050 MHz
WDW                  EM
SSB                  0
LB                   3.00 Hz
GB                   0
PC                   1.00

```

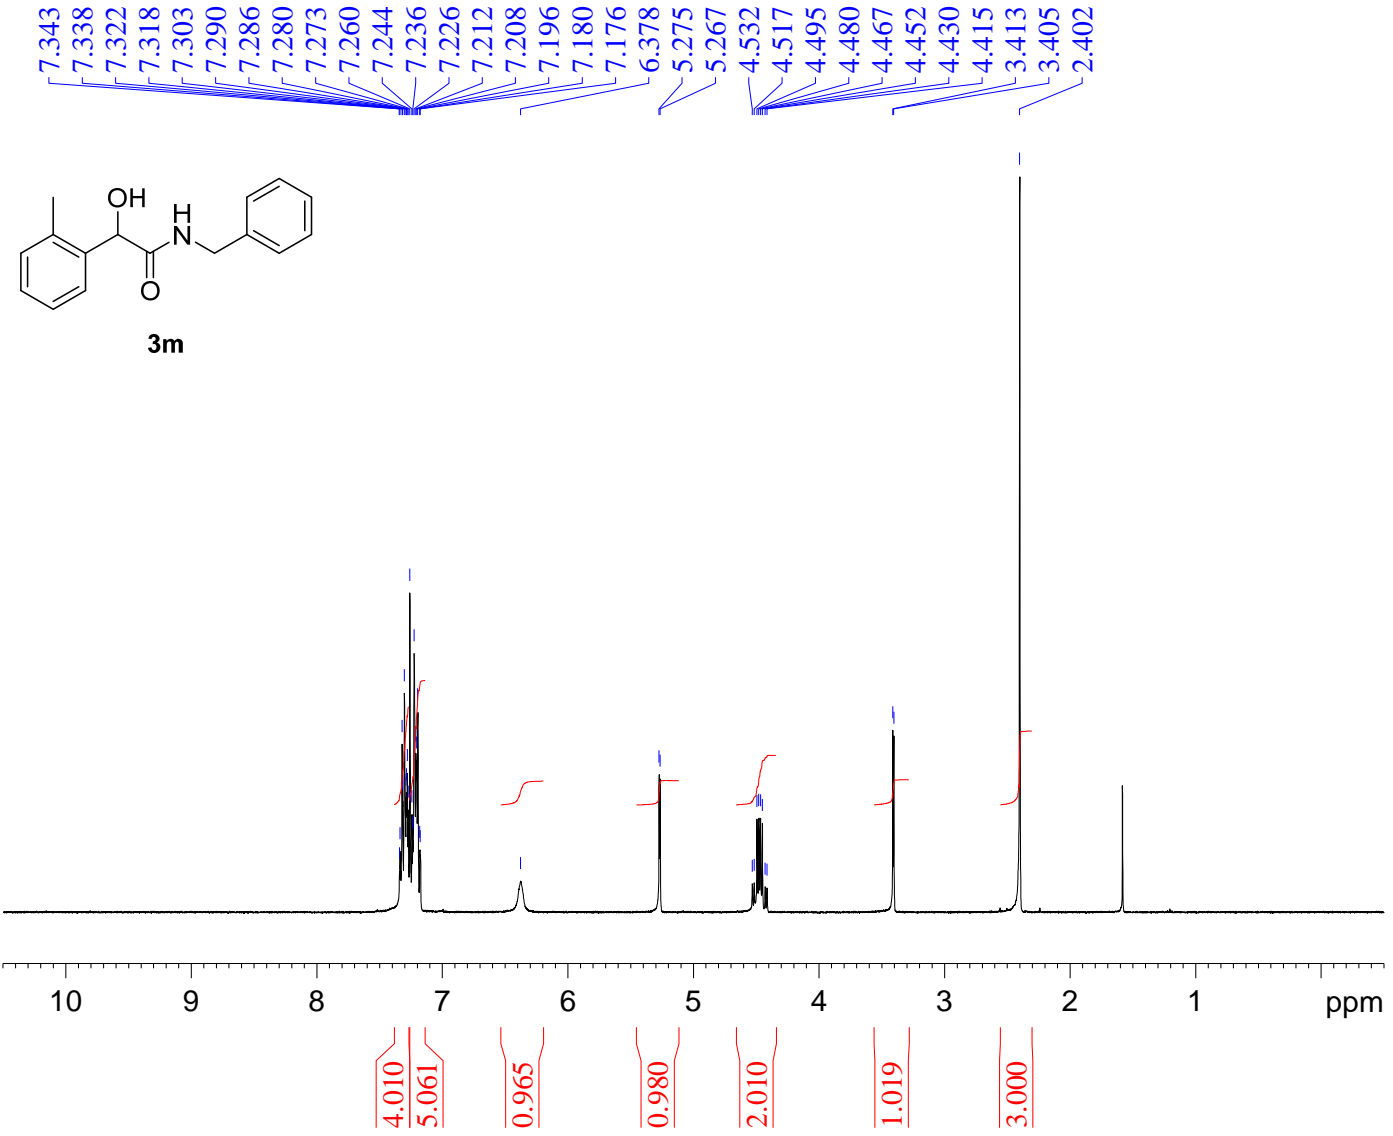

NAME 20160114  
 EXPNO 2  
 PROCNO 1  
 Date\_ 20160114  
 Time 20.27  
 INSTRUM spect  
 PROBHD 5 mm DUL 13C-1  
 PULPROG zg30  
 TD 32768  
 SOLVENT CDCl3  
 NS 13  
 DS 0  
 SWH 6410.256 Hz  
 FIDRES 0.195625 Hz  
 AQ 2.5559540 sec  
 RG 4  
 DW 78.000 usec  
 DE 6.00 usec  
 TE 300.0 K  
 D1 2.00000000 sec  
 TD0 1

===== CHANNEL f1 =====  
 NUC1 1H  
 P1 10.00 usec  
 PL1 -2.40 dB  
 SFO1 400.1528010 MHz  
 SI 16384  
 SF 400.1500091 MHz  
 WDW EM  
 SSB 0  
 LB 0.00 Hz  
 GB 0  
 PC 1.00

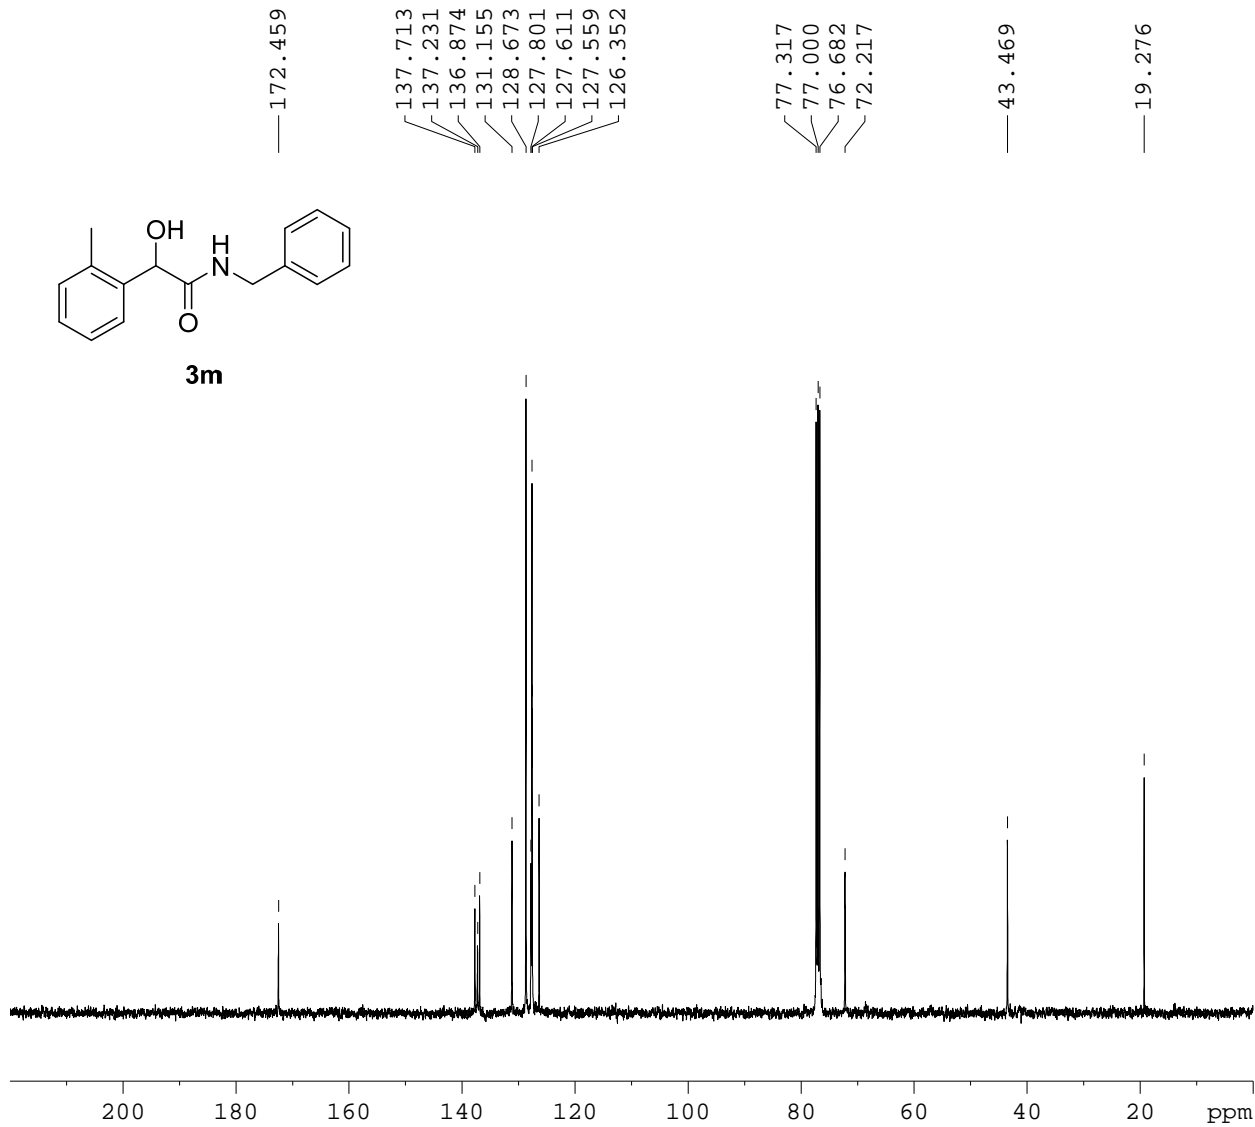

```

NAME      Substrate 13C
EXPNO     22
PROCNO    1
Date_     20150814
Time      20.30
INSTRUM   spect
PROBHD    5 mm DUL 13C-1
PULPROG   zgpg30
TD        65536
SOLVENT   CDC13
NS        460
DS        0
SWH       22727.273 Hz
FIDRES    0.346791 Hz
AQ        1.4418420 sec
RG        57
DW        22.000 usec
DE        6.00 usec
TE        300.0 K
D1        2.00000000 sec
d11       0.03000000 sec
DELTA     1.89999998 sec
TD0       1

```

```

===== CHANNEL f1 =====
NUC1      13C
P1        9.70 usec
PL1       -0.50 dB
SFO1     100.6288660 MHz

```

```

===== CHANNEL f2 =====
CPDPRG2   waltz16
NUC2      1H
PCPD2     90.00 usec
PL2       -2.40 dB
PL12      15.10 dB
PL13      18.10 dB
SFO2     400.1516010 MHz
SI        32768
SF        100.6178037 MHz
WDW       EM
SSB       0
LB        3.00 Hz
GB        0
PC        1.00

```

8.015  
8.013  
7.874  
7.870  
7.867  
7.863  
7.420  
7.389  
7.385  
7.380  
7.375  
7.372  
7.368  
7.333  
7.330  
7.312  
7.260  
7.205  
7.202  
7.198  
7.196  
7.184  
7.182  
7.177  
7.175  
4.587  
4.572  
3.869

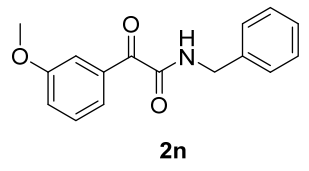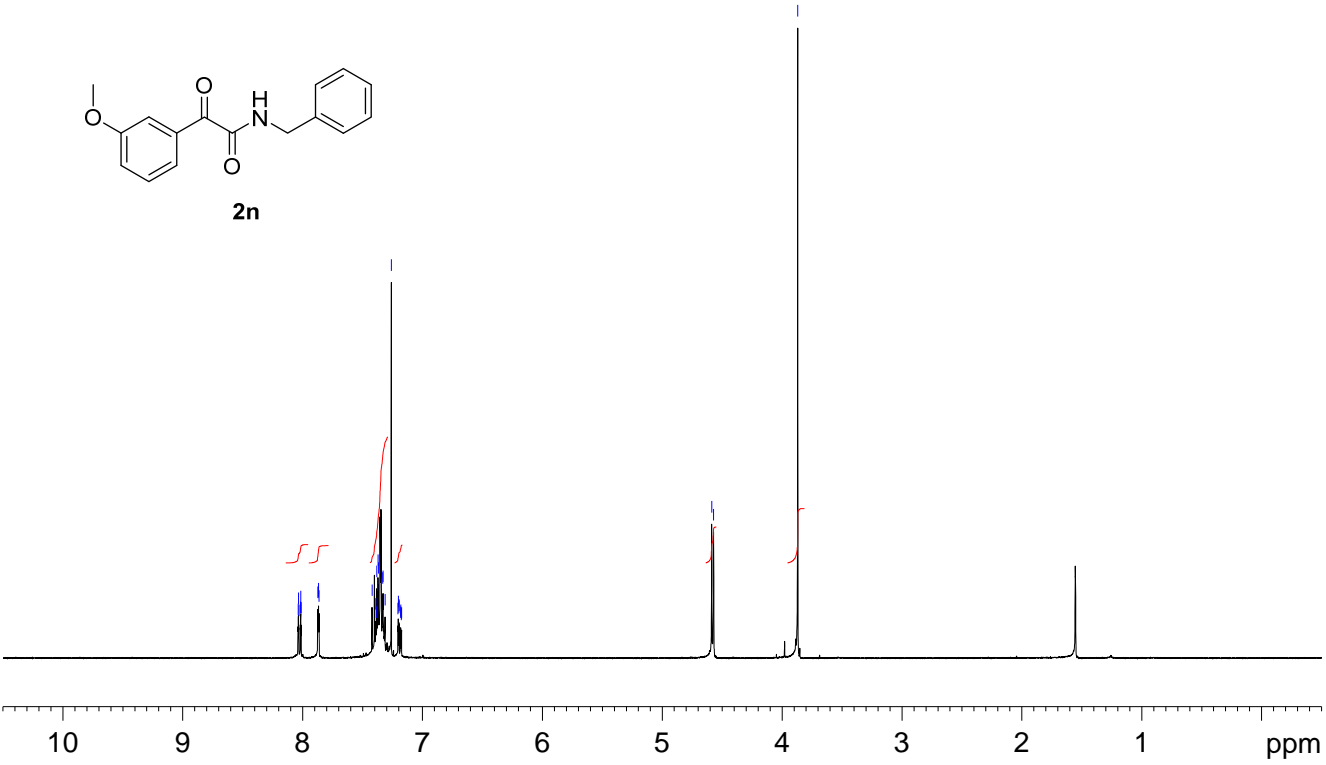

1.027  
0.967  
7.001  
0.997

2.000  
3.003

NAME 20151125  
EXPNO 1  
PROCNO 1  
Date\_ 20151125  
Time 19.08  
INSTRUM spect  
PROBHD 5 mm DUL 13C-1  
PULPROG zg30  
TD 32768  
SOLVENT CDCl3  
NS 30  
DS 0  
SWH 6410.256 Hz  
FIDRES 0.195625 Hz  
AQ 2.5559540 sec  
RG 4  
DW 78.000 usec  
DE 6.00 usec  
TE 300.0 K  
D1 2.00000000 sec  
TD0 1

===== CHANNEL f1 =====  
NUC1 1H  
P1 10.00 usec  
PL1 -2.40 dB  
SFO1 400.1528010 MHz  
SI 16384  
SF 400.1500089 MHz  
WDW EM  
SSB 0  
LB 0.00 Hz  
GB 0  
PC 1.00

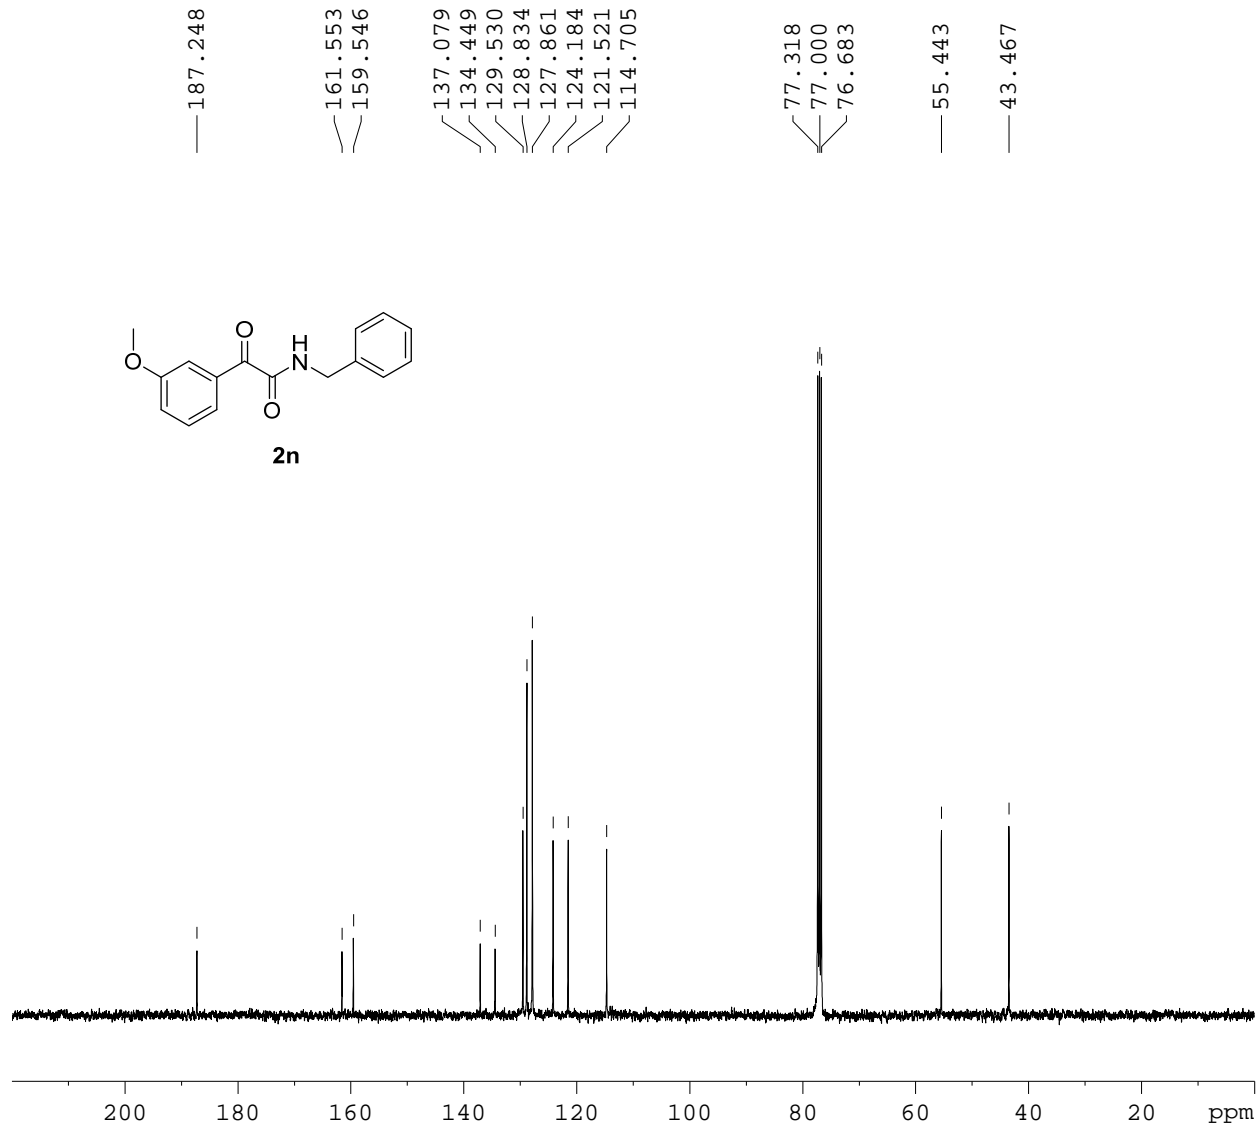

```

NAME          20151125
EXPNO         2
PROCNO        1
Date_         20151125
Time          19.38
INSTRUM       spect
PROBHD        5 mm DUL 13C-1
PULPROG       zgpg30
TD            65536
SOLVENT       CDC13
NS            492
DS            0
SWH           22727.273 Hz
FIDRES        0.346791 Hz
AQ            1.4418420 sec
RG            57
DW            22.000 usec
DE            6.00 usec
TE            300.0 K
D1            2.00000000 sec
d11           0.03000000 sec
DELTA         1.89999998 sec
TD0           1

```

```

===== CHANNEL f1 =====
NUC1          13C
P1            9.70 usec
PL1           -0.50 dB
SFO1          100.6288660 MHz

```

```

===== CHANNEL f2 =====
CPDPRG2       waltz16
NUC2          1H
PCPD2         90.00 usec
PL2           -2.40 dB
PL12          15.10 dB
PL13          18.10 dB
SFO2          400.1516010 MHz
SI            32768
SF            100.6178017 MHz
WDW           EM
SSB           0
LB            3.00 Hz
GB            0
PC            1.00

```

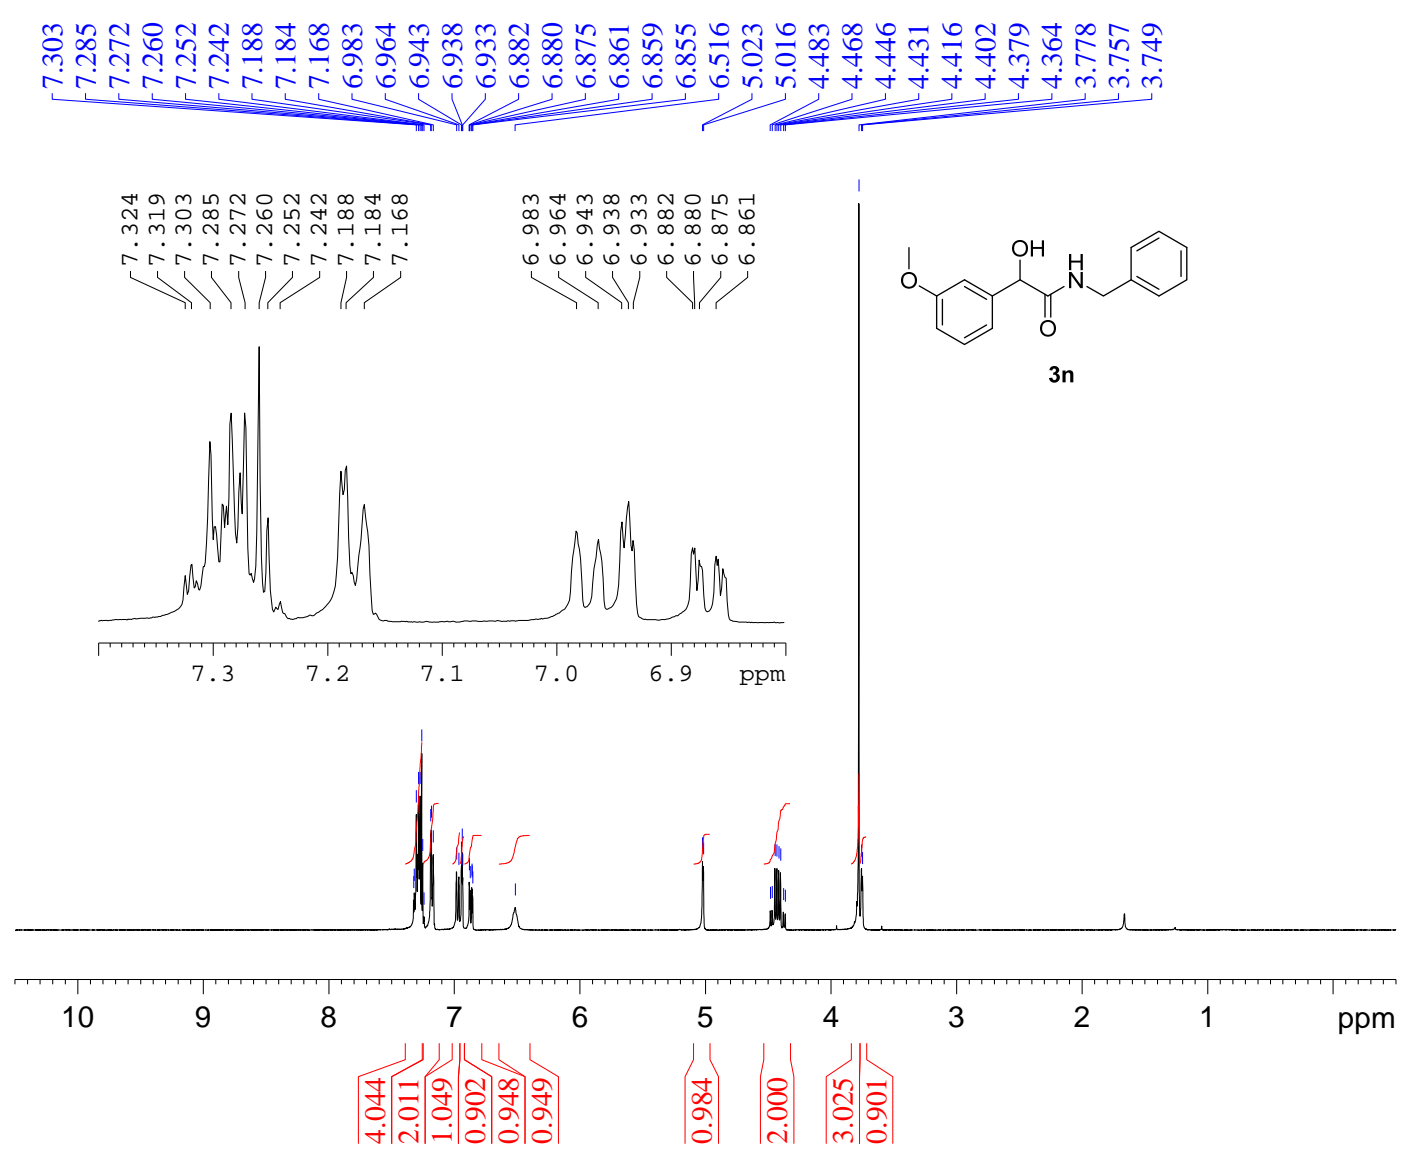

NAME 20151116  
 EXPNO 1  
 PROCNO 1  
 Date\_ 20151116  
 Time 20.08  
 INSTRUM spect  
 PROBHD 5 mm DUL 13C-1  
 PULPROG zg30  
 TD 32768  
 SOLVENT CDCl3  
 NS 16  
 DS 0  
 SWH 6410.256 Hz  
 FIDRES 0.195625 Hz  
 AQ 2.5559540 sec  
 RG 4  
 DW 78.000 usec  
 DE 6.00 usec  
 TE 300.0 K  
 D1 2.00000000 sec  
 TD0 1

===== CHANNEL f1 =====  
 NUC1 1H  
 P1 10.00 usec  
 PL1 -2.40 dB  
 SFO1 400.1528010 MHz  
 SI 16384  
 SF 400.1500089 MHz  
 WDW EM  
 SSB 0  
 LB 0.00 Hz  
 GB 0  
 PC 1.00



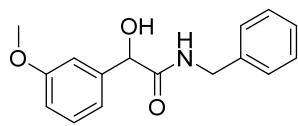

**3n**

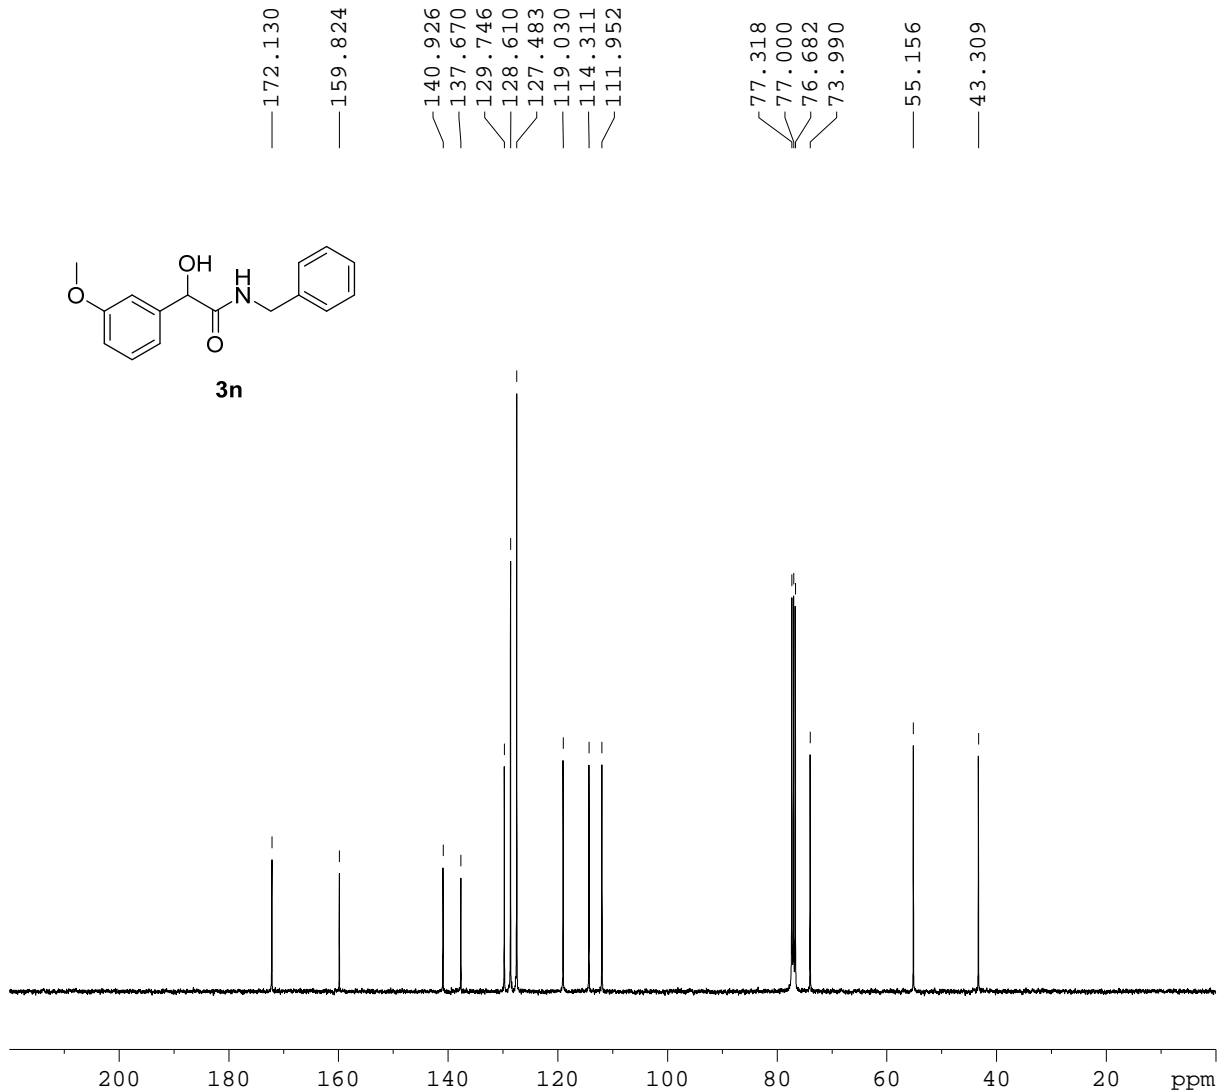

```

NAME          20151116
EXPNO         2
PROCNO        1
Date_         20151116
Time          20.15
INSTRUM       spect
PROBHD        5 mm DUL 13C-1
PULPROG       zgpg30
TD            65536
SOLVENT       CDC13
NS            748
DS            0
SWH           22727.273 Hz
FIDRES        0.346791 Hz
AQ            1.4418420 sec
RG            57
DW            22.000 usec
DE            6.00 usec
TE            300.0 K
D1            2.00000000 sec
d11           0.03000000 sec
DELTA         1.89999998 sec
TD0           1

```

```

===== CHANNEL f1 =====
NUC1          13C
P1            9.70 usec
PL1           -0.50 dB
SFO1         100.6288660 MHz

```

```

===== CHANNEL f2 =====
CPDPRG2      waltz16
NUC2          1H
PCPD2        90.00 usec
PL2           -2.40 dB
PL12         15.10 dB
PL13         18.10 dB
SFO2         400.1516010 MHz
SI            32768
SF           100.6178066 MHz
WDW           EM
SSB           0
LB            3.00 Hz
GB            0
PC            1.00

```

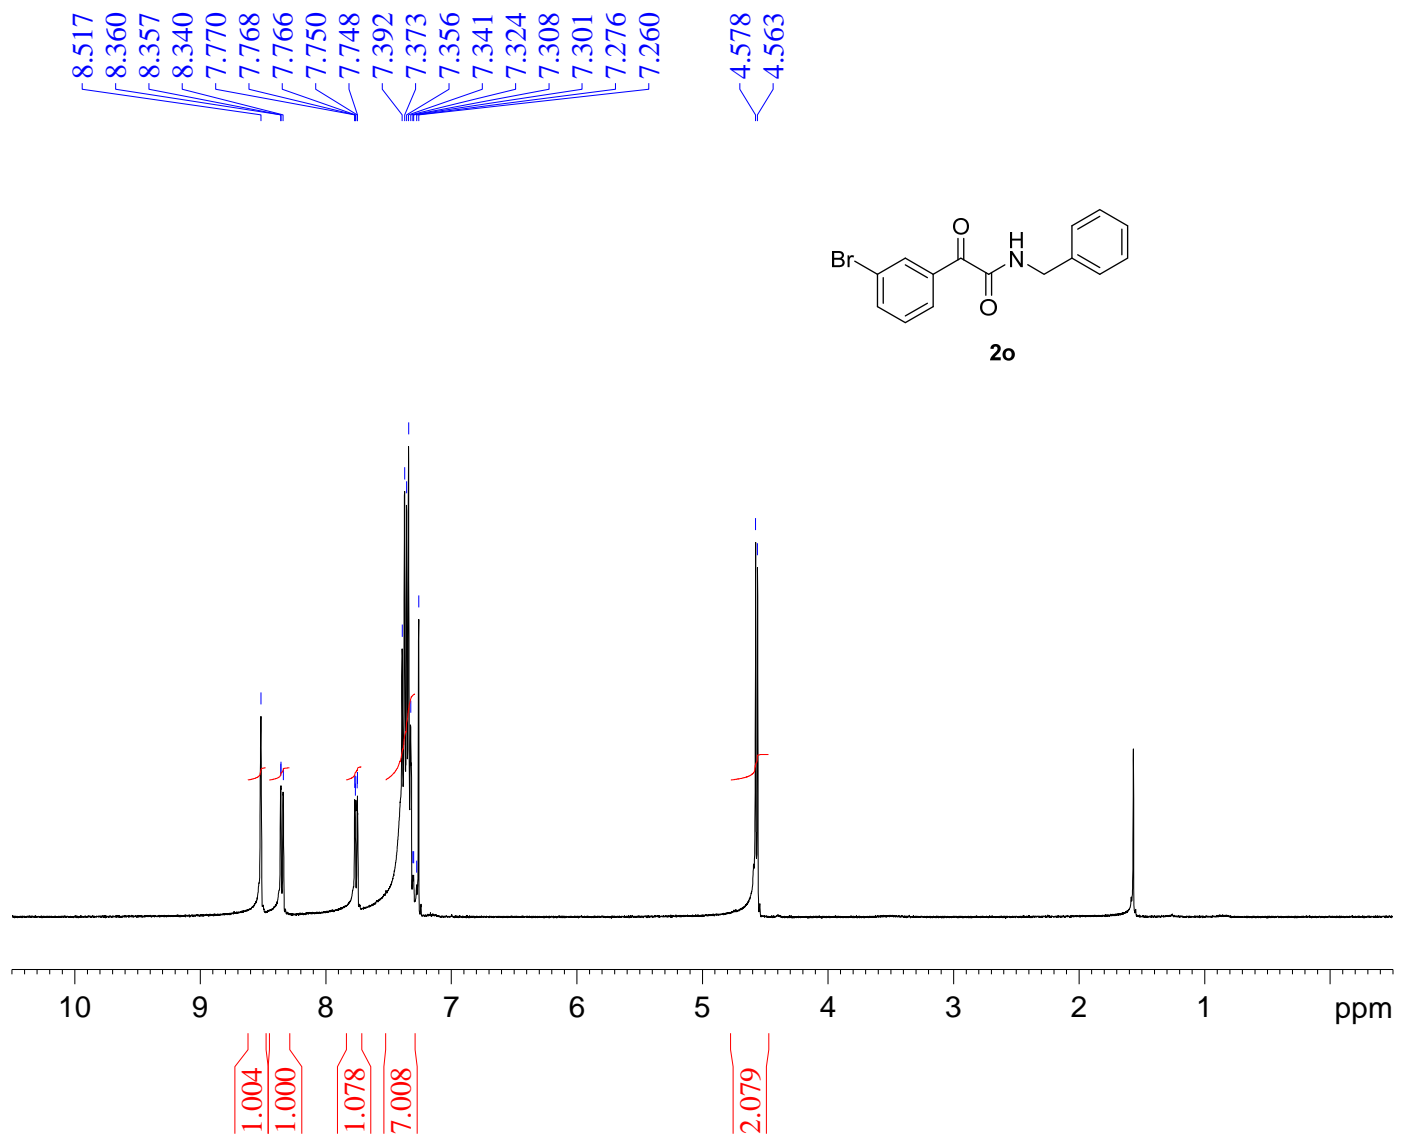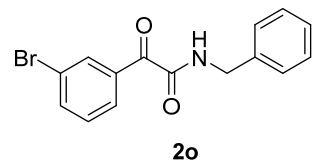

NAME 20151130  
 EXPNO 4  
 PROCNO 1  
 Date\_ 20151107  
 Time 19.23  
 INSTRUM spect  
 PROBHD 5 mm DUL 13C-1  
 PULPROG zg30  
 TD 32768  
 SOLVENT CDCl3  
 NS 73  
 DS 0  
 SWH 6410.256 Hz  
 FIDRES 0.195625 Hz  
 AQ 2.5559540 sec  
 RG 4  
 DW 78.000 usec  
 DE 6.00 usec  
 TE 300.0 K  
 D1 2.00000000 sec  
 TD0 1

===== CHANNEL f1 =====  
 NUC1 1H  
 P1 10.00 usec  
 PL1 -2.40 dB  
 SFO1 400.1528010 MHz  
 SI 16384  
 SF 400.1500088 MHz  
 WDW EM  
 SSB 0  
 LB 0.00 Hz  
 GB 0  
 PC 1.00

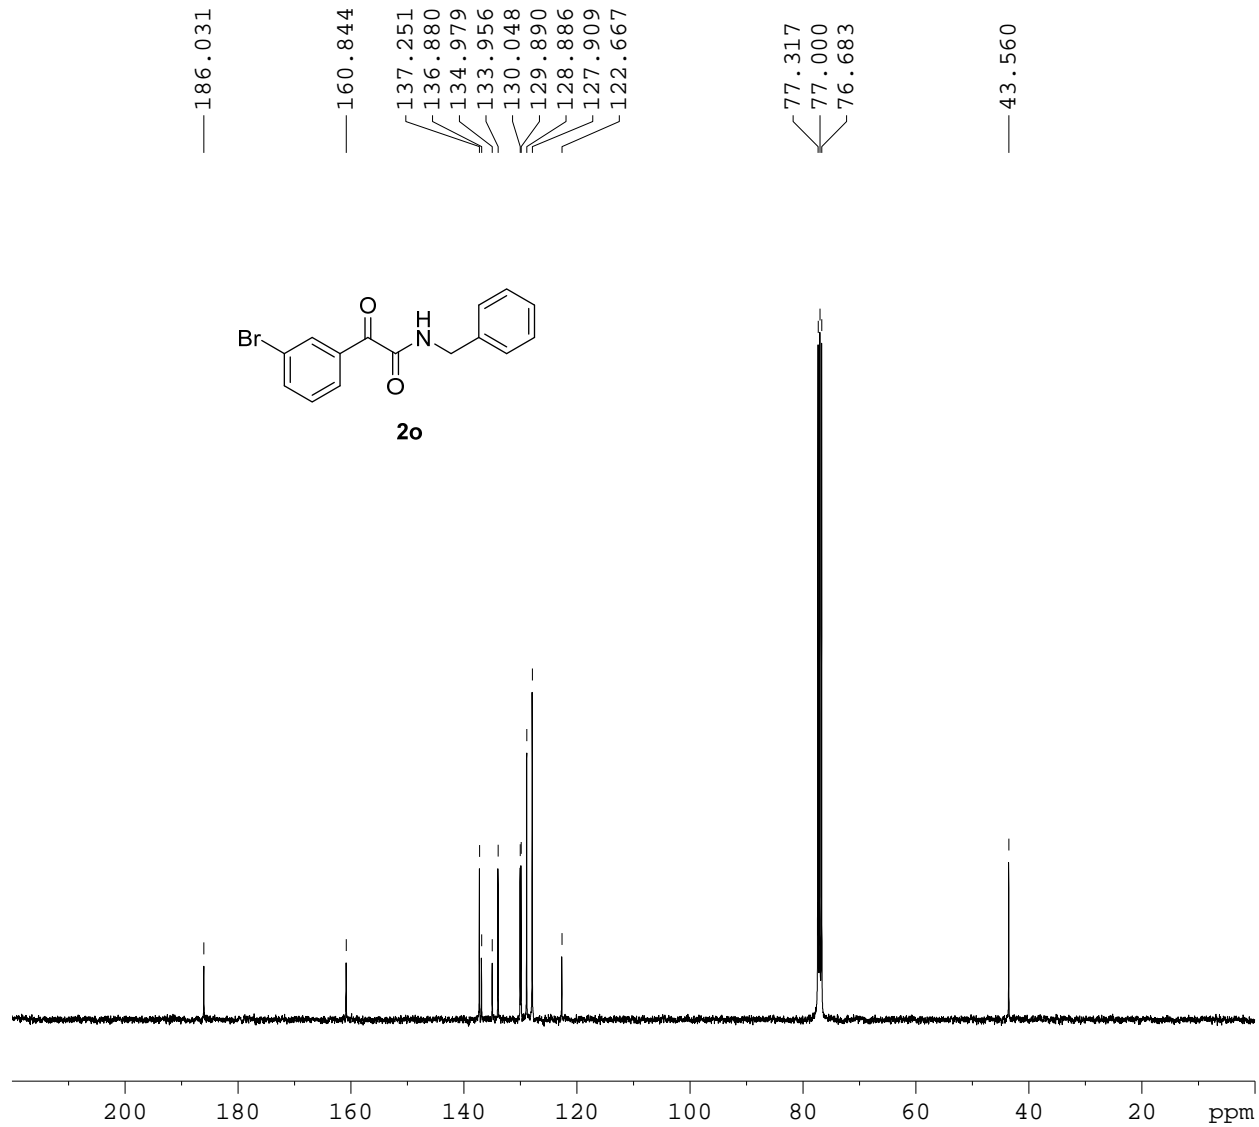

```

NAME          20151113
EXPNO         1
PROCNO        1
Date_         20151113
Time          20.02
INSTRUM       spect
PROBHD        5 mm DUL 13C-1
PULPROG       zgpg30
TD            65536
SOLVENT       CDCl3
NS            993
DS            0
SWH           22727.273 Hz
FIDRES        0.346791 Hz
AQ            1.4418420 sec
RG            57
DW            22.000 usec
DE            6.00 usec
TE            300.0 K
D1            2.00000000 sec
d11           0.03000000 sec
DELTA         1.89999998 sec
TDO           1

```

```

===== CHANNEL f1 =====
NUC1          13C
P1            9.70 usec
PL1           -0.50 dB
SFO1         100.6288660 MHz

```

```

===== CHANNEL f2 =====
CPDPRG2      waltz16
NUC2          1H
PCPD2        90.00 usec
PL2           -2.40 dB
PL12         15.10 dB
PL13         18.10 dB
SFO2         400.1516010 MHz
SI            32768
SF           100.6178009 MHz
WDW           EM
SSB           0
LB            3.00 Hz
GB            0
PC            1.00

```

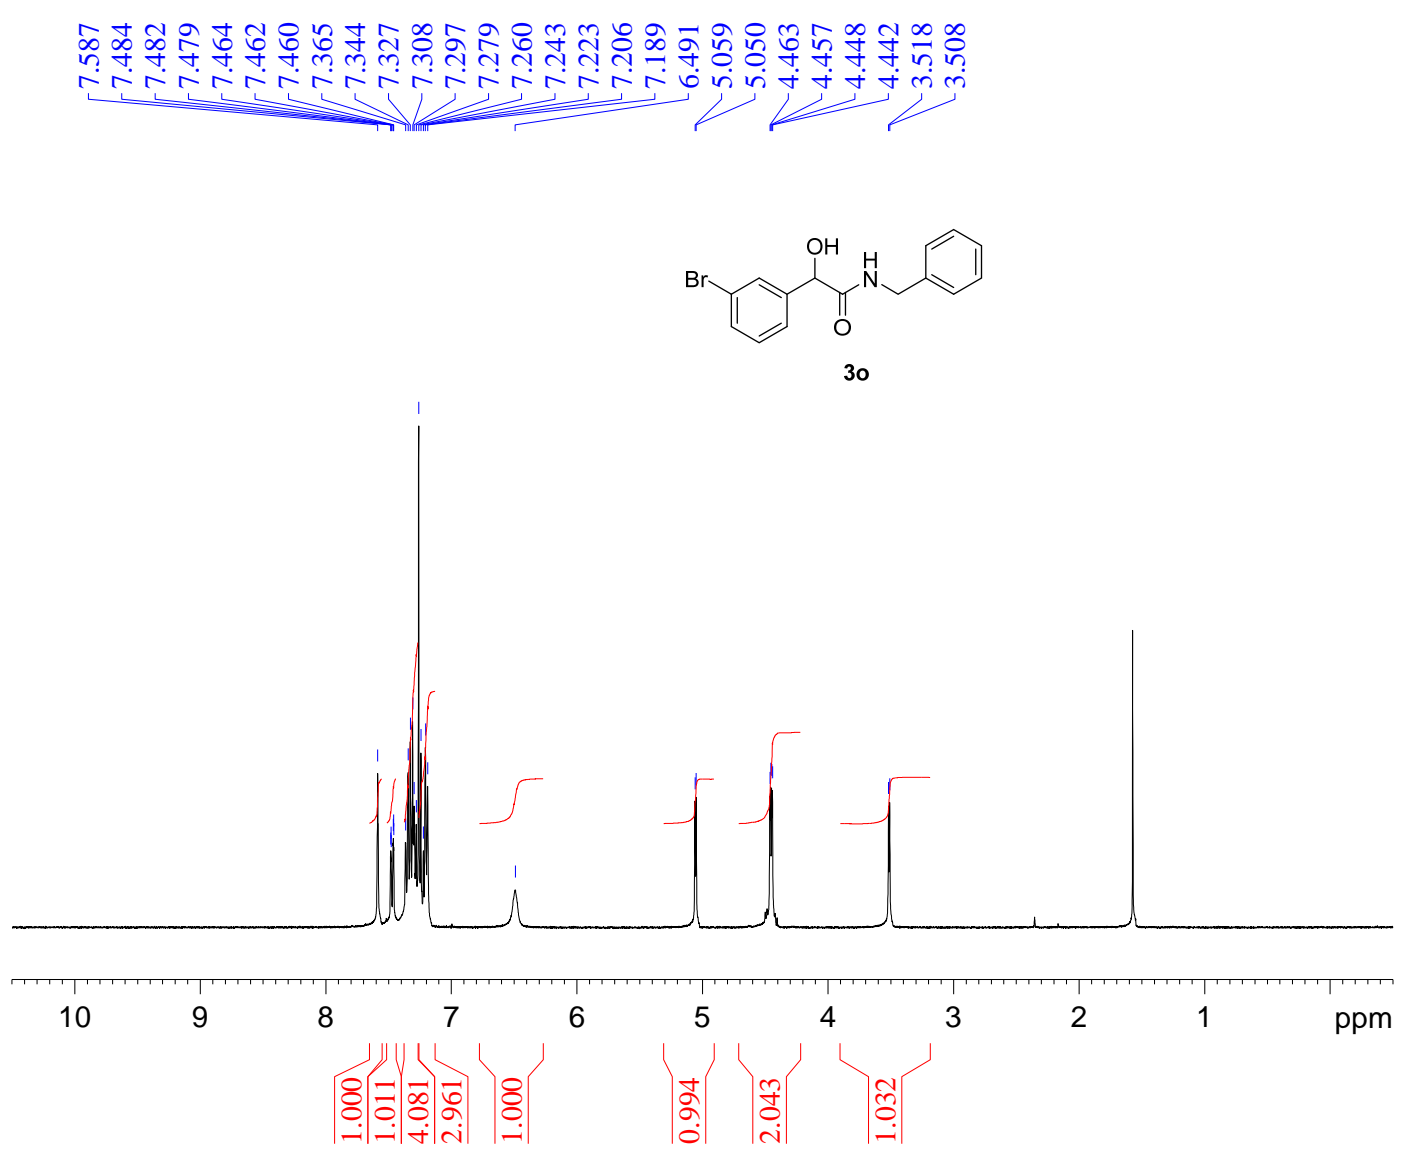

NAME 20151208  
 EXPNO 1  
 PROCNO 1  
 Date\_ 20151208  
 Time 21.13  
 INSTRUM spect  
 PROBHD 5 mm DUL 13C-1  
 PULPROG zg30  
 TD 32768  
 SOLVENT CDCl<sub>3</sub>  
 NS 64  
 DS 0  
 SWH 6410.256 Hz  
 FIDRES 0.195625 Hz  
 AQ 2.5559540 sec  
 RG 4  
 DW 78.000 usec  
 DE 6.00 usec  
 TE 300.0 K  
 D1 2.00000000 sec  
 TD0 1

===== CHANNEL f1 =====  
 NUC1 1H  
 P1 10.00 usec  
 PL1 -2.40 dB  
 SFO1 400.1528010 MHz  
 SI 16384  
 SF 400.1500093 MHz  
 WDW EM  
 SSB 0  
 LB 0.00 Hz  
 GB 0  
 PC 1.00

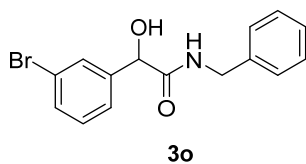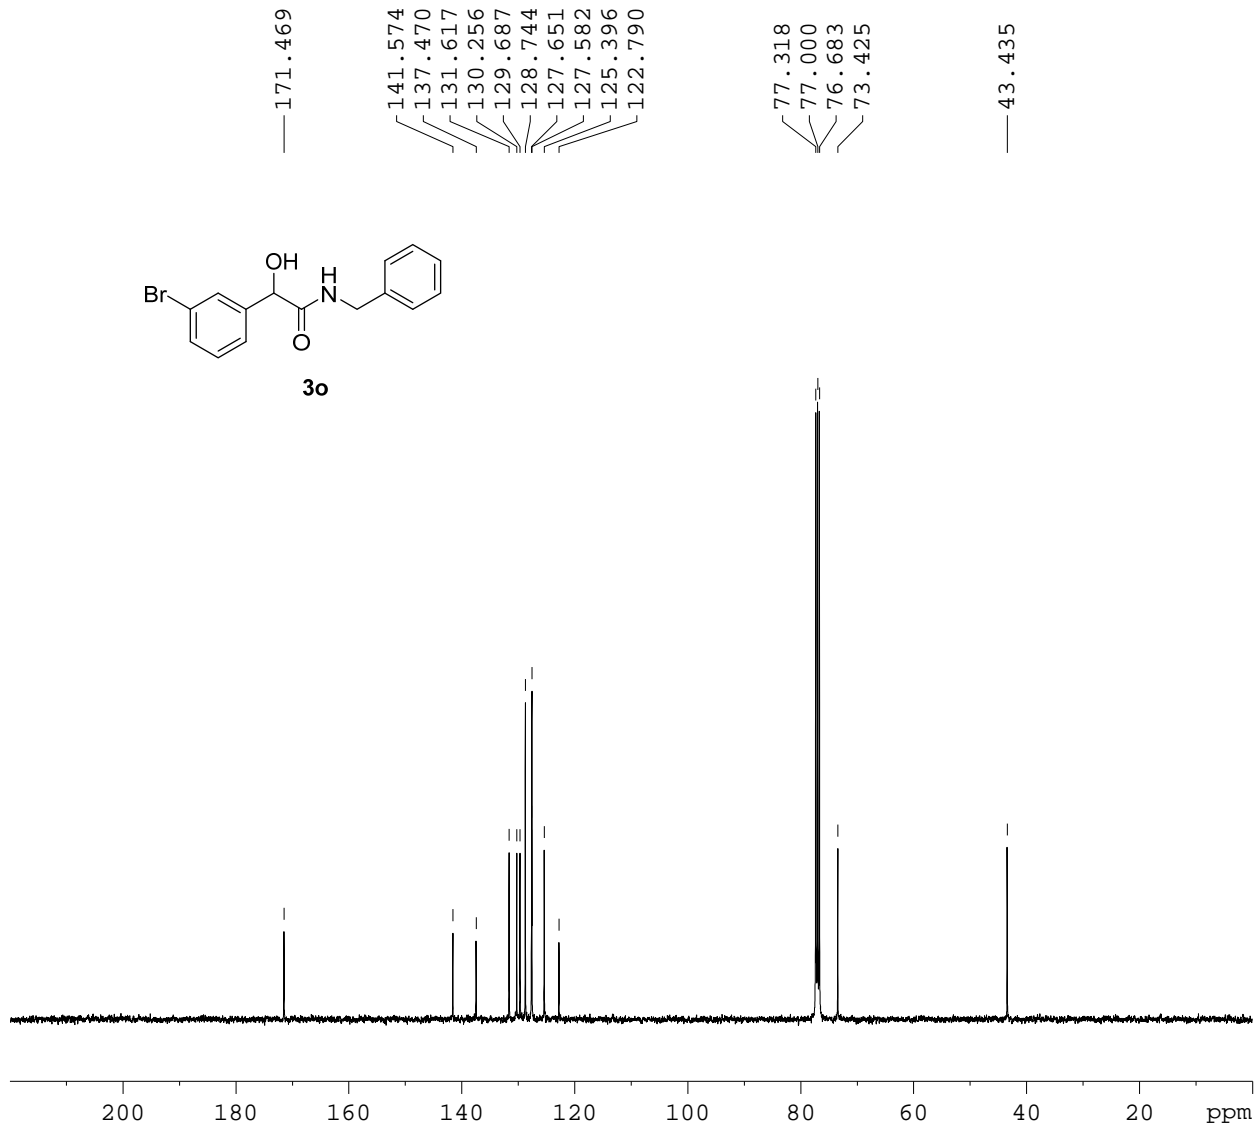

```

NAME          20151114
EXPNO         1
PROCNO        1
Date_         20151114
Time          20.09
INSTRUM       spect
PROBHD        5 mm DUL 13C-1
PULPROG       zgpg30
TD            65536
SOLVENT       CDC13
NS            752
DS            0
SWH           22727.273 Hz
FIDRES        0.346791 Hz
AQ            1.4418420 sec
RG            57
DW            22.000 usec
DE            6.00 usec
TE            300.0 K
D1            2.00000000 sec
d11           0.03000000 sec
DELTA         1.899999998 sec
TD0           1

```

```

===== CHANNEL f1 =====
NUC1          13C
P1            9.70 usec
PL1           -0.50 dB
SFO1         100.6288660 MHz

```

```

===== CHANNEL f2 =====
CPDPRG2      waltz16
NUC2          1H
PCPD2        90.00 usec
PL2           -2.40 dB
PL12         15.10 dB
PL13         18.10 dB
SFO2         400.1516010 MHz
SI           32768
SF           100.6178022 MHz
WDW          EM
SSB          0
LB           3.00 Hz
GB           0
PC           1.00

```

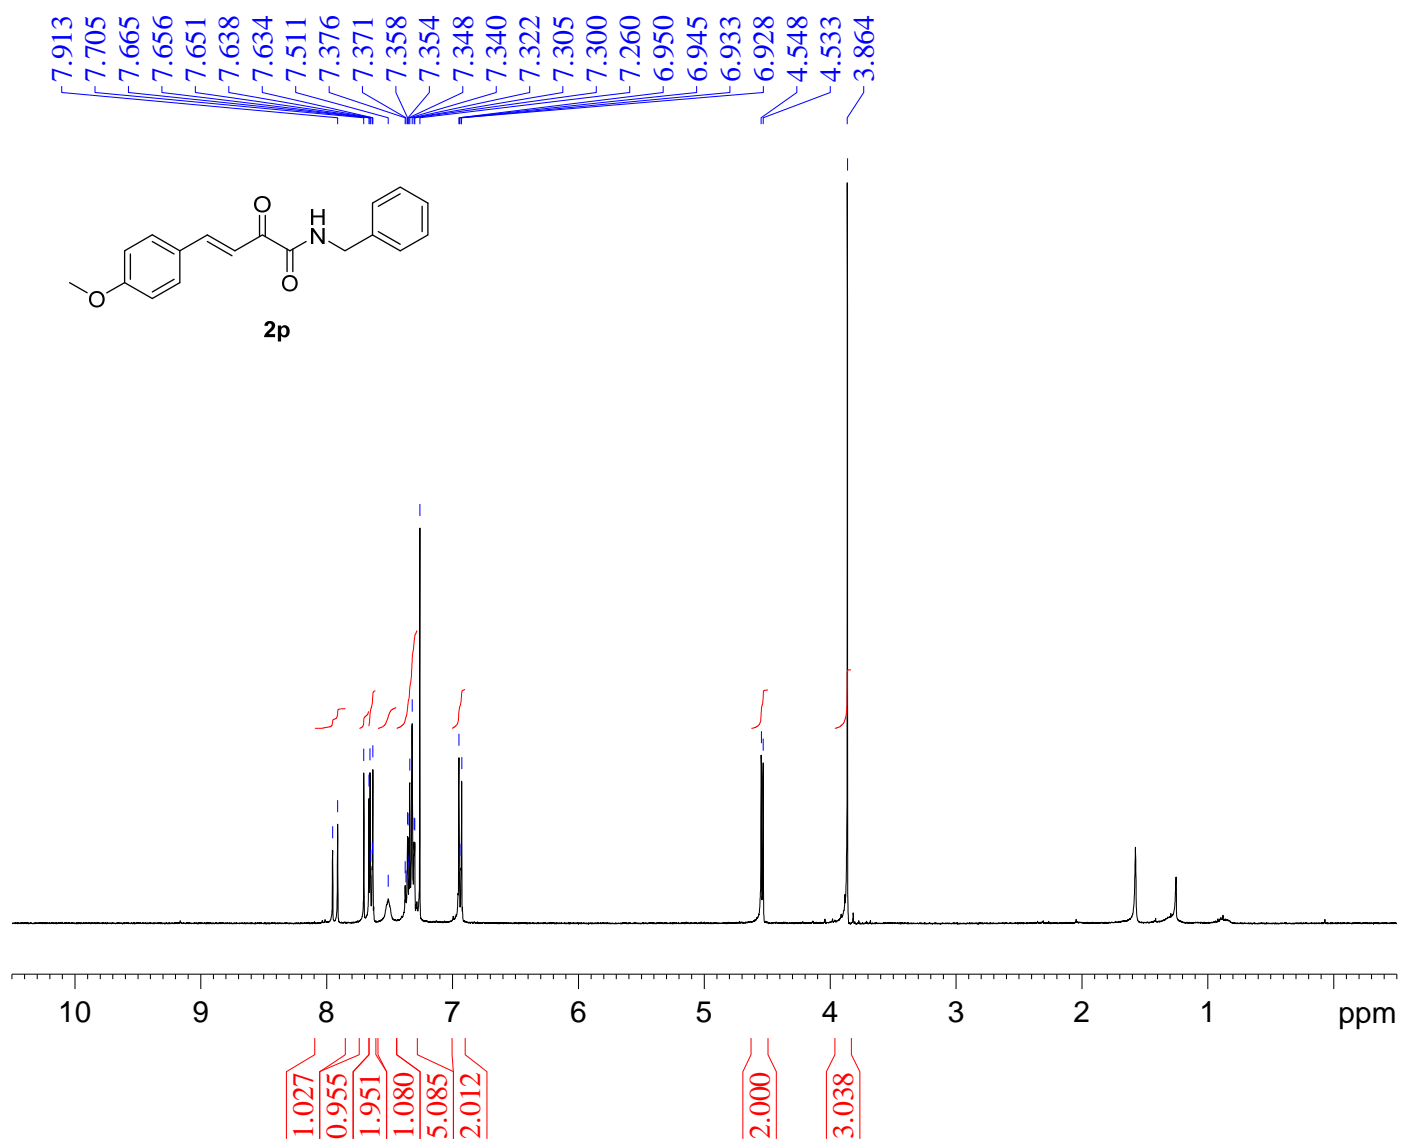

NAME 20151213  
 EXPNO 1  
 PROCNO 1  
 Date\_ 20151213  
 Time 19.00  
 INSTRUM spect  
 PROBHD 5 mm DUL 13C-1  
 PULPROG zg30  
 TD 32768  
 SOLVENT CDCl<sub>3</sub>  
 NS 45  
 DS 0  
 SWH 6410.256 Hz  
 FIDRES 0.195625 Hz  
 AQ 2.5559540 sec  
 RG 4  
 DW 78.000 usec  
 DE 6.00 usec  
 TE 300.0 K  
 D1 2.00000000 sec  
 TD0 1

===== CHANNEL f1 =====  
 NUC1 1H  
 P1 10.00 usec  
 PL1 -2.40 dB  
 SFO1 400.1528010 MHz  
 SI 16384  
 SF 400.1500088 MHz  
 WDW EM  
 SSB 0  
 LB 0.00 Hz  
 GB 0  
 PC 1.00

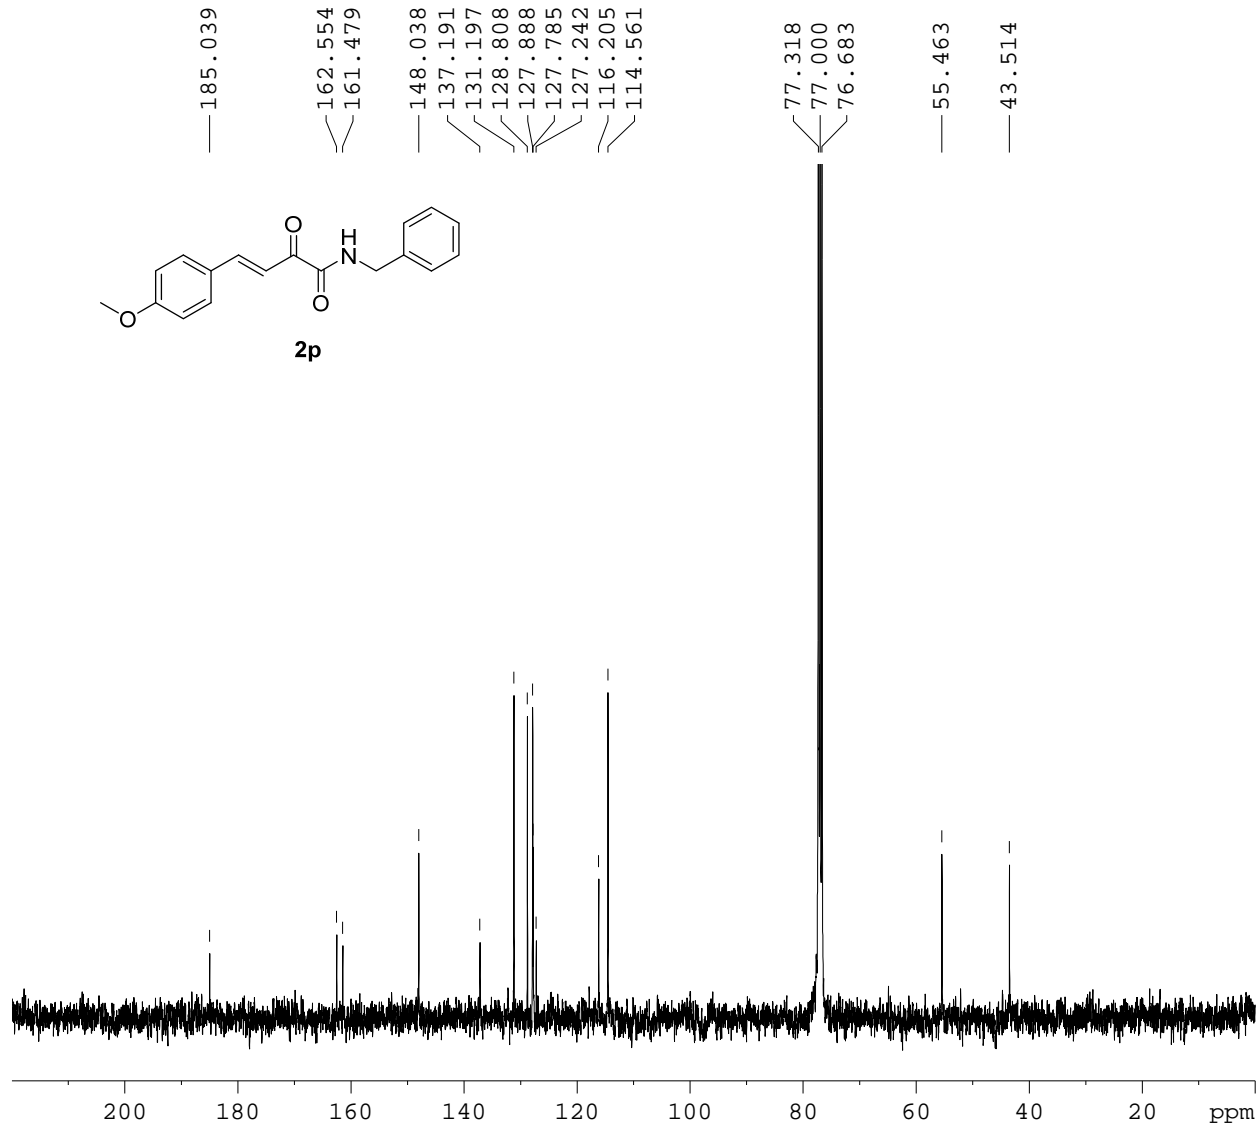

```

NAME          20151213
EXPNO         2
PROCNO        1
Date_         20151213
Time          19.05
INSTRUM       spect
PROBHD        5 mm DUL 13C-1
PULPROG       zgpg30
TD            65536
SOLVENT       CDC13
NS            786
DS            0
SWH           22727.273 Hz
FIDRES        0.346791 Hz
AQ            1.4418420 sec
RG            57
DW            22.000 usec
DE            6.00 usec
TE            300.0 K
D1            2.00000000 sec
d11           0.03000000 sec
DELTA         1.89999998 sec
TD0           1

```

```

===== CHANNEL f1 =====
NUC1          13C
P1            9.70 usec
PL1           -0.50 dB
SFO1          100.6288660 MHz

```

```

===== CHANNEL f2 =====
CPDPRG2       waltz16
NUC2          1H
PCPD2         90.00 usec
PL2           -2.40 dB
PL12          15.10 dB
PL13          18.10 dB
SFO2          400.1516010 MHz
SI            32768
SF            100.6177996 MHz
WDW           EM
SSB           0
LB            3.00 Hz
GB            0
PC            1.00

```

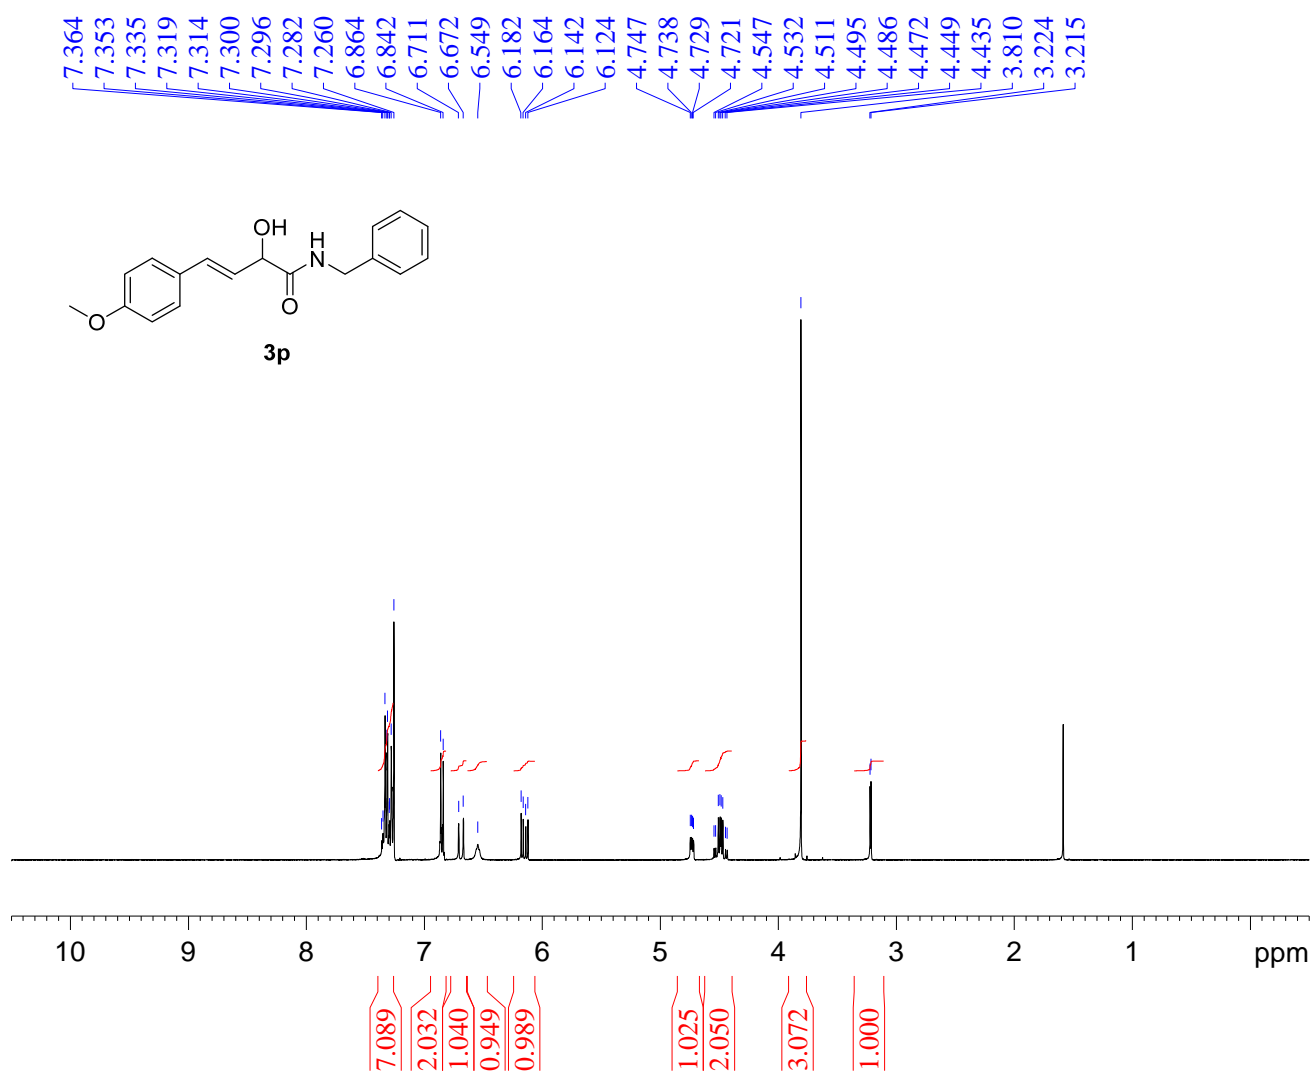

NAME 20151210  
 EXPNO 1  
 PROCNO 1  
 Date\_ 20151210  
 Time 15.11  
 INSTRUM spect  
 PROBHD 5 mm DUL 13C-1  
 PULPROG zg30  
 TD 32768  
 SOLVENT CDCl3  
 NS 38  
 DS 0  
 SWH 6410.256 Hz  
 FIDRES 0.195625 Hz  
 AQ 2.5559540 sec  
 RG 4  
 DW 78.000 usec  
 DE 6.00 usec  
 TE 300.0 K  
 D1 2.00000000 sec  
 TD0 1

===== CHANNEL f1 =====  
 NUC1 1H  
 P1 10.00 usec  
 PL1 -2.40 dB  
 SFO1 400.1528010 MHz  
 SI 16384  
 SF 400.1500091 MHz  
 WDW EM  
 SSB 0  
 LB 0.00 Hz  
 GB 0  
 PC 1.00



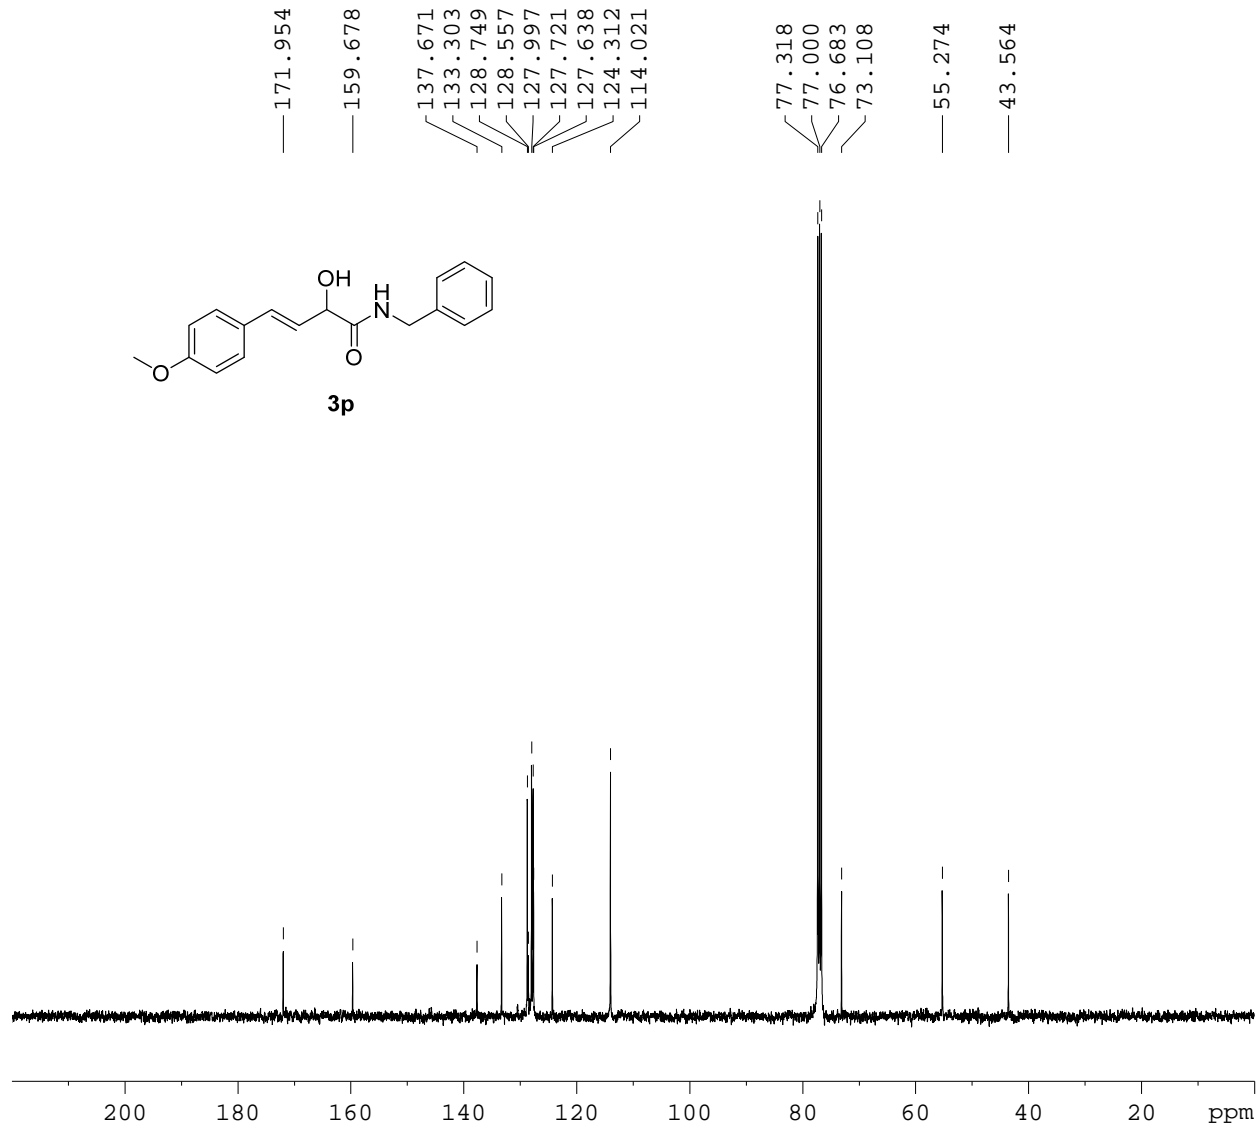

```

NAME          20151210
EXPNO         2
PROCNO        1
Date_         20151210
Time          21.23
INSTRUM       spect
PROBHD        5 mm DUL 13C-1
PULPROG       zgpg30
TD            65536
SOLVENT       CDC13
NS            712
DS            0
SWH           22727.273 Hz
FIDRES        0.346791 Hz
AQ            1.4418420 sec
RG            57
DW            22.000 usec
DE            6.00 usec
TE            300.0 K
D1            2.00000000 sec
d11           0.03000000 sec
DELTA         1.89999998 sec
TD0           1

```

```

===== CHANNEL f1 =====
NUC1          13C
P1            9.70 usec
PL1           -0.50 dB
SFO1         100.6288660 MHz

```

```

===== CHANNEL f2 =====
CPDPRG2       waltz16
NUC2          1H
PCPD2         90.00 usec
PL2           -2.40 dB
PL12          15.10 dB
PL13          18.10 dB
SFO2         400.1516010 MHz
SI            32768
SF            100.6178015 MHz
WDW           EM
SSB           0
LB            3.00 Hz
GB            0
PC            1.00

```

7.697  
7.695  
7.693  
7.691  
7.503  
7.499  
7.482  
7.478  
7.466  
7.462  
7.460  
7.447  
7.400  
7.395  
7.389  
7.382  
7.379  
7.375  
7.370  
7.362  
7.361  
7.354  
7.322  
7.260  
4.588  
4.573

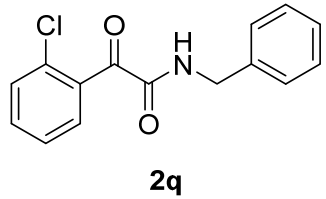

NAME 20151118  
EXPNO 1  
PROCNO 1  
Date\_ 20151118  
Time 19.54  
INSTRUM spect  
PROBHD 5 mm DUL 13C-1  
PULPROG zg30  
TD 32768  
SOLVENT CDCl3  
NS 64  
DS 0  
SWH 6410.256 Hz  
FIDRES 0.195625 Hz  
AQ 2.5559540 sec  
RG 4  
DW 78.000 usec  
DE 6.00 usec  
TE 300.0 K  
D1 2.00000000 sec  
TD0 1

===== CHANNEL f1 =====  
NUC1 1H  
P1 10.00 usec  
PL1 -2.40 dB  
SFO1 400.1528010 MHz  
SI 16384  
SF 400.1500088 MHz  
WDW EM  
SSB 0  
LB 0.00 Hz  
GB 0  
PC 1.00

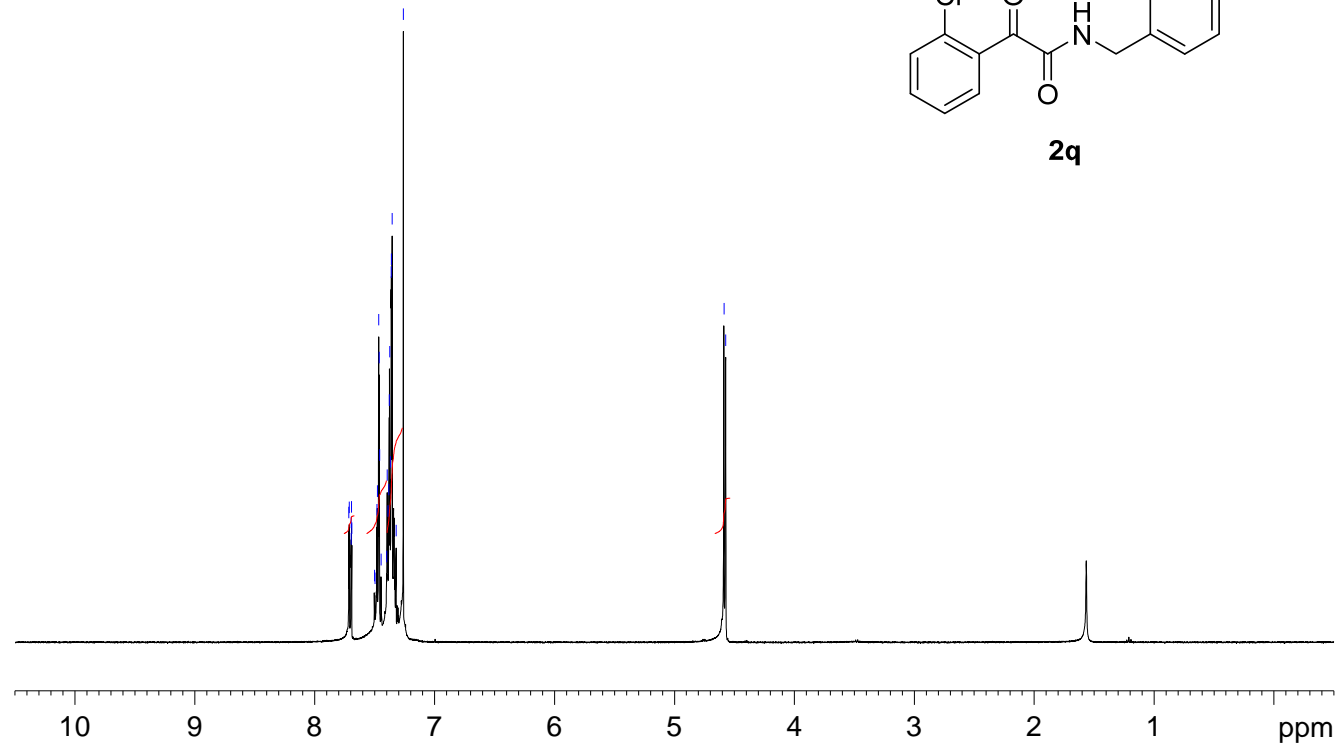

1.014  
3.030  
6.010  
2.000

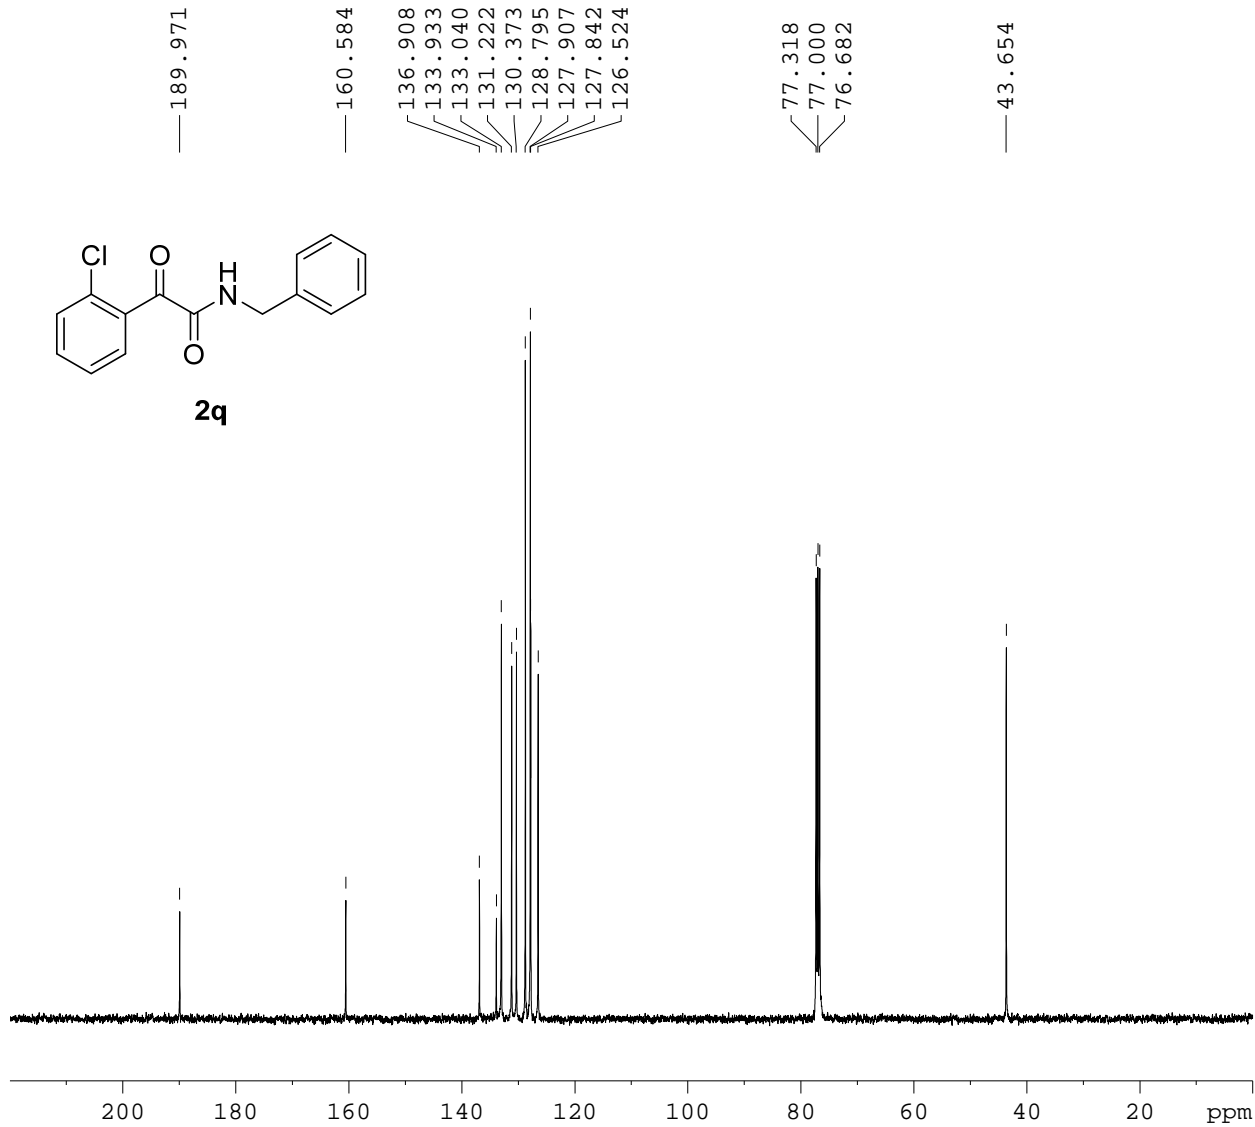

```

NAME      Substrate 13C
EXPNO     20
PROCNO    1
Date_     20150812
Time      20.25
INSTRUM   spect
PROBHD    5 mm DUL 13C-1
PULPROG   zgpg30
TD        65536
SOLVENT   CDC13
NS        572
DS        0
SWH       22727.273 Hz
FIDRES    0.346791 Hz
AQ        1.4418420 sec
RG        57
DW        22.000 usec
DE        6.00 usec
TE        300.0 K
D1        2.00000000 sec
d11       0.03000000 sec
DELTA     1.89999998 sec
TD0       1

```

```

===== CHANNEL f1 =====
NUC1      13C
P1        9.70 usec
PL1       -0.50 dB
SFO1     100.6288660 MHz

```

```

===== CHANNEL f2 =====
CPDPRG2   waltz16
NUC2      1H
PCPD2     90.00 usec
PL2       -2.40 dB
PL12      15.10 dB
PL13      18.10 dB
SFO2     400.1516010 MHz
SI        32768
SF        100.6178062 MHz
WDW       EM
SSB       0
LB        3.00 Hz
GB        0
PC        1.00

```

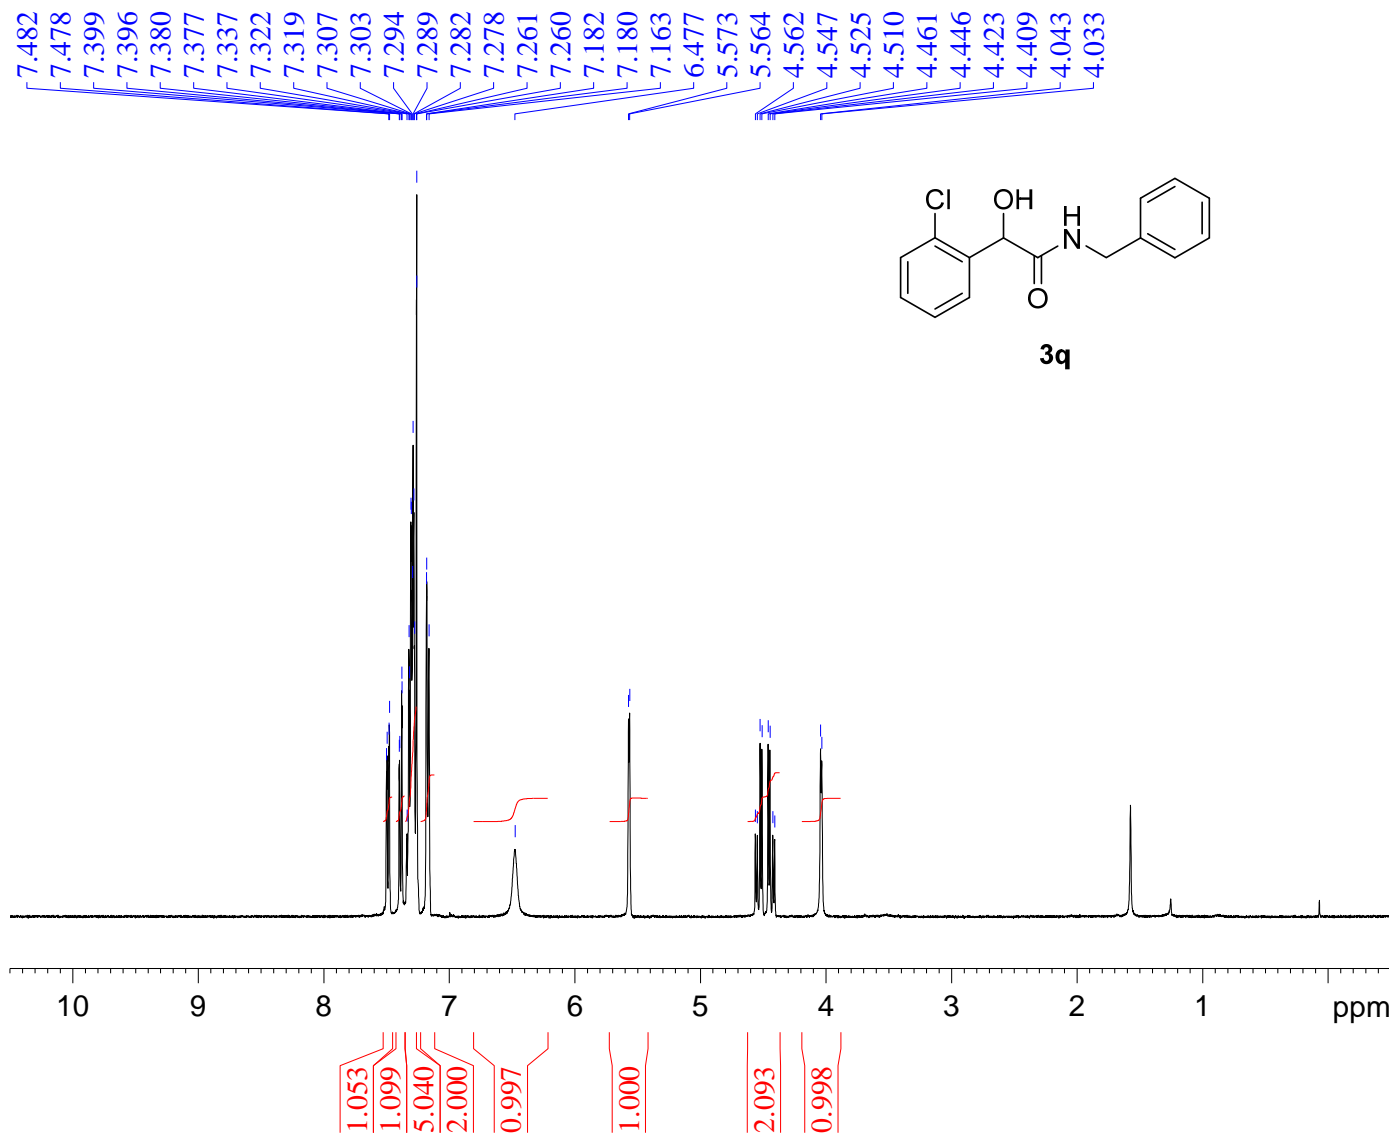

NAME 20160120  
 EXPNO 1  
 PROCNO 1  
 Date\_ 20160120  
 Time 19.55  
 INSTRUM spect  
 PROBHD 5 mm DUL 13C-1  
 PULPROG zg30  
 TD 32768  
 SOLVENT CDCl3  
 NS 48  
 DS 0  
 SWH 6410.256 Hz  
 FIDRES 0.195625 Hz  
 AQ 2.5559540 sec  
 RG 4  
 DW 78.000 usec  
 DE 6.00 usec  
 TE 300.0 K  
 D1 2.00000000 sec  
 TD0 1

===== CHANNEL f1 =====  
 NUC1 1H  
 P1 10.00 usec  
 PL1 -2.40 dB  
 SFO1 400.1528010 MHz  
 SI 16384  
 SF 400.1500089 MHz  
 WDW EM  
 SSB 0  
 LB 0.00 Hz  
 GB 0  
 PC 1.00

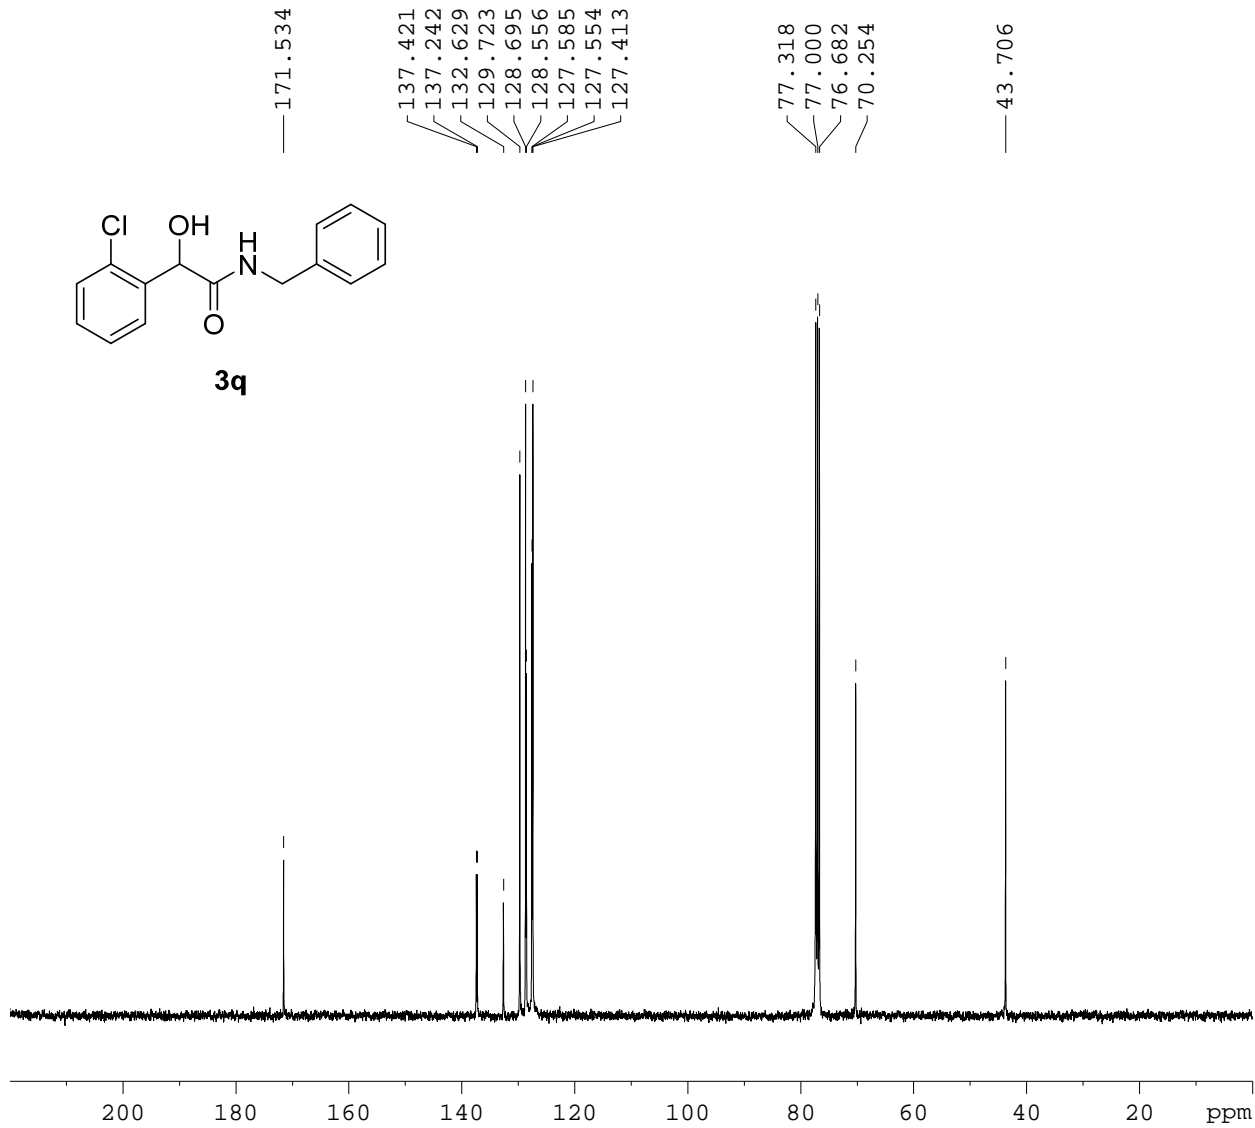

```

NAME          20160120
EXPNO         2
PROCNO        1
Date_         20160120
Time          20.02
INSTRUM       spect
PROBHD        5 mm DUL 13C-1
PULPROG       zgpg30
TD            65536
SOLVENT       CDC13
NS            900
DS            0
SWH           22727.273 Hz
FIDRES        0.346791 Hz
AQ            1.4418420 sec
RG            57
DW            22.000 usec
DE            6.00 usec
TE            300.0 K
D1            2.00000000 sec
d11           0.03000000 sec
DELTA         1.899999998 sec
TD0           1
  
```

```

===== CHANNEL f1 =====
NUC1          13C
P1            9.70 usec
PL1           -0.50 dB
SFO1         100.6288660 MHz
  
```

```

===== CHANNEL f2 =====
CPDPRG2       waltz16
NUC2          1H
PCPD2         90.00 usec
PL2           -2.40 dB
PL12          15.10 dB
PL13          18.10 dB
SFO2         400.1516010 MHz
SI            32768
SF            100.6178045 MHz
WDW           EM
SSB           0
LB            3.00 Hz
GB            0
PC            1.00
  
```

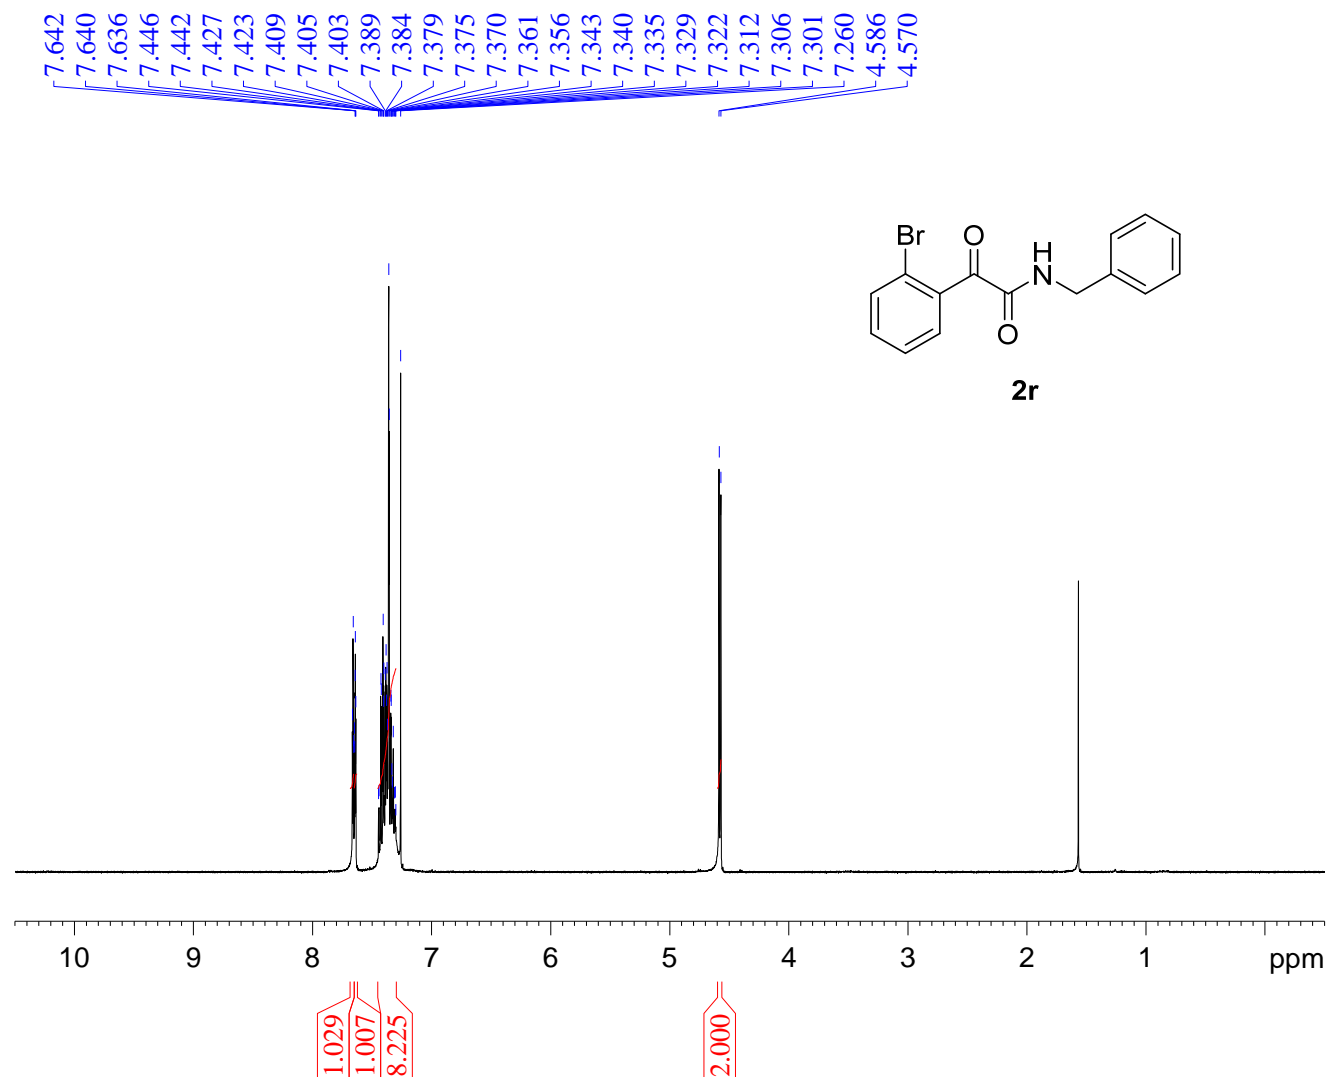

NAME 20151111  
 EXPNO 1  
 PROCNO 1  
 Date\_ 20151111  
 Time 20.12  
 INSTRUM spect  
 PROBHD 5 mm DUL 13C-1  
 PULPROG zg30  
 TD 32768  
 SOLVENT CDCl3  
 NS 16  
 DS 0  
 SWH 6410.256 Hz  
 FIDRES 0.195625 Hz  
 AQ 2.5559540 sec  
 RG 4  
 DW 78.000 usec  
 DE 6.00 usec  
 TE 300.0 K  
 D1 2.00000000 sec  
 TD0 1

===== CHANNEL f1 =====  
 NUC1 1H  
 P1 10.00 usec  
 PL1 -2.40 dB  
 SFO1 400.1528010 MHz  
 SI 16384  
 SF 400.1500089 MHz  
 WDW EM  
 SSB 0  
 LB 0.00 Hz  
 GB 0  
 PC 1.00

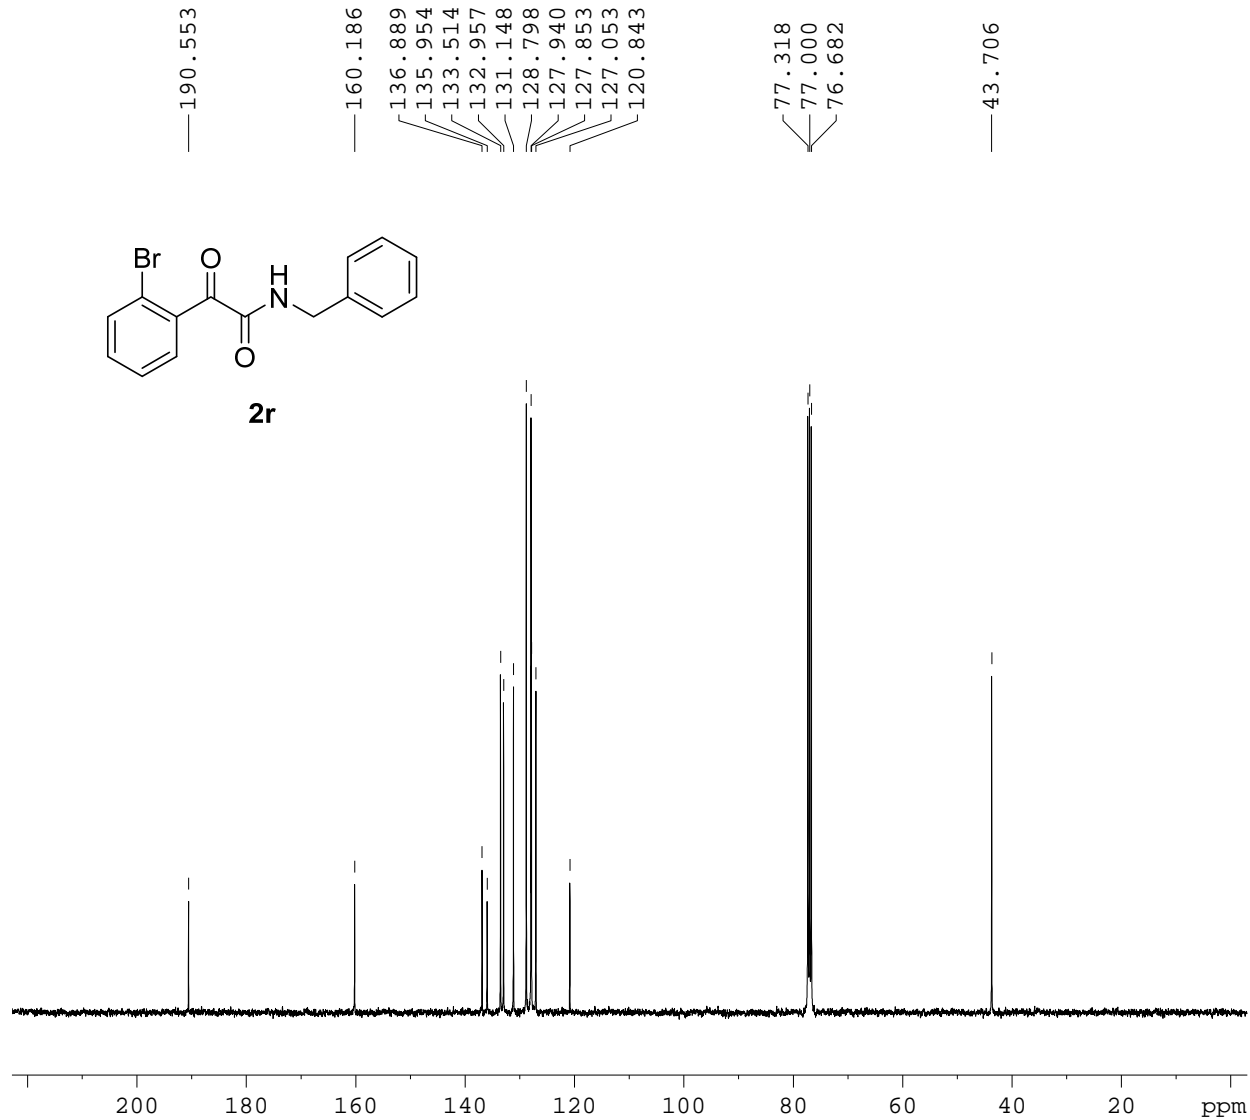

```

NAME          20151111
EXPNO         2
PROCNO        1
Date_         20151111
Time          20.17
INSTRUM       spect
PROBHD        5 mm DUL 13C-1
PULPROG       zgpg30
TD            65536
SOLVENT       CDC13
NS            716
DS            0
SWH           22727.273 Hz
FIDRES        0.346791 Hz
AQ            1.4418420 sec
RG            57
DW            22.000 usec
DE            6.00 usec
TE            300.0 K
D1            2.00000000 sec
d11           0.03000000 sec
DELTA         1.89999998 sec
TD0           1

```

```

===== CHANNEL f1 =====
NUC1          13C
P1            9.70 usec
PL1           -0.50 dB
SFO1         100.6288660 MHz

```

```

===== CHANNEL f2 =====
CPDPRG2       waltz16
NUC2          1H
PCPD2         90.00 usec
PL2           -2.40 dB
PL12          15.10 dB
PL13          18.10 dB
SFO2         400.1516010 MHz
SI            32768
SF            100.6178060 MHz
WDW           EM
SSB           0
LB            3.00 Hz
GB            0
PC            1.00

```

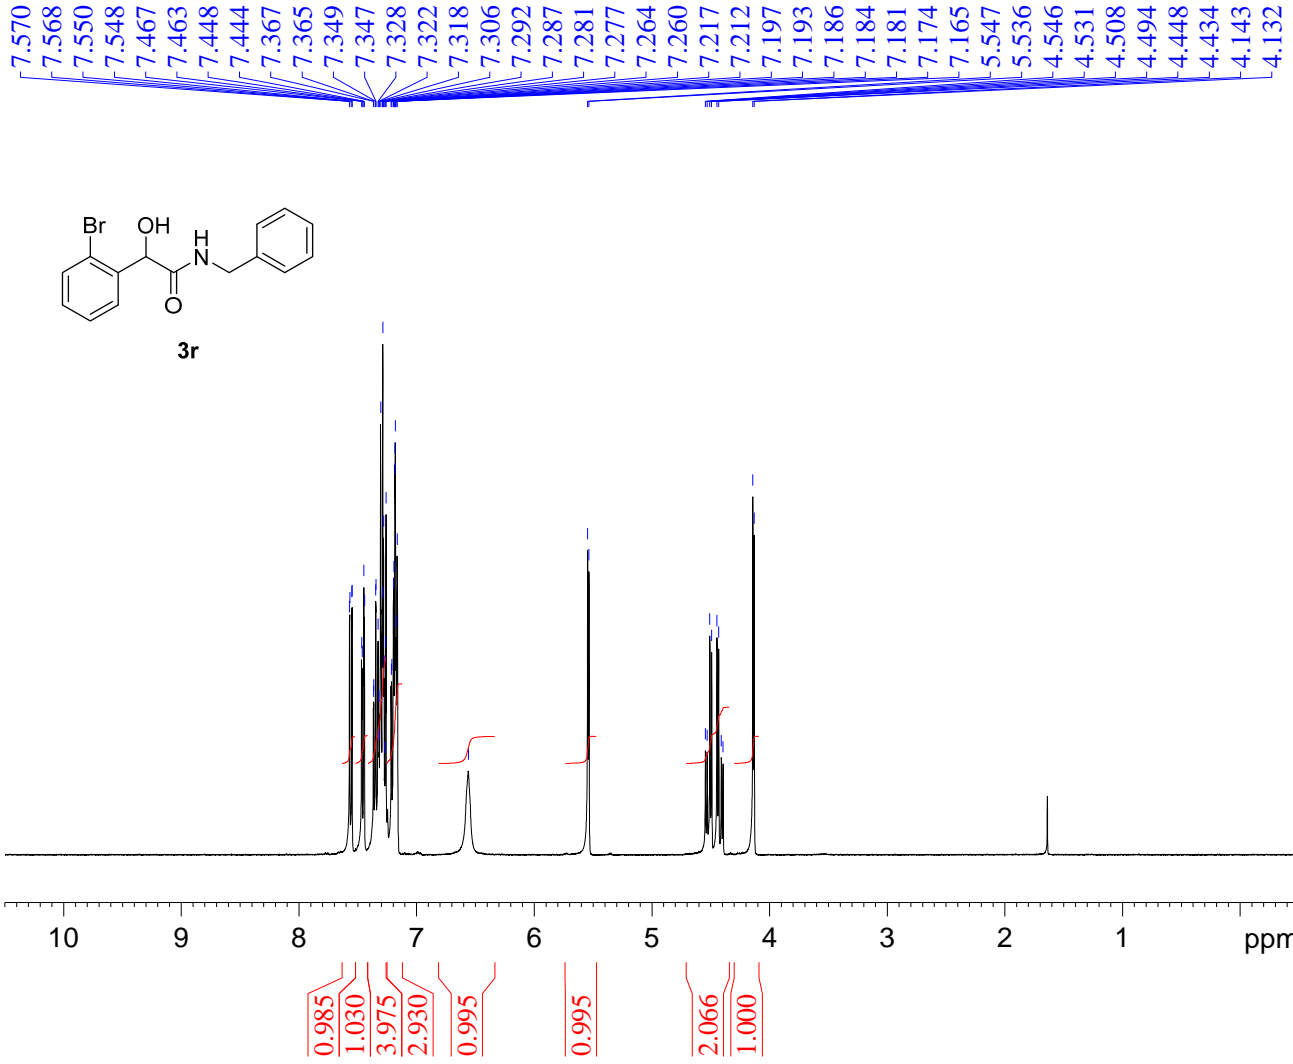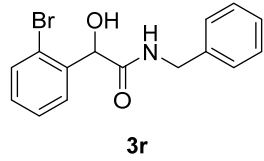

NAME Substrate  
 EXPNO 5  
 PROCNO 1  
 Date\_ 20150426  
 Time 17.39  
 INSTRUM spect  
 PROBHD 5 mm DUL 13C-1  
 PULPROG zg30  
 TD 32768  
 SOLVENT CDCl3  
 NS 44  
 DS 0  
 SWH 6410.256 Hz  
 FIDRES 0.195625 Hz  
 AQ 2.5559540 sec  
 RG 4  
 DW 78.000 usec  
 DE 6.00 usec  
 TE 300.0 K  
 D1 2.00000000 sec  
 TD0 1

===== CHANNEL f1 =====  
 NUC1 1H  
 P1 10.00 usec  
 PL1 -2.40 dB  
 SFO1 400.1528010 MHz  
 SI 16384  
 SF 400.1500092 MHz  
 WDW EM  
 SSB 0  
 LB 0.00 Hz  
 GB 0  
 PC 1.00



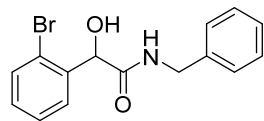

3r

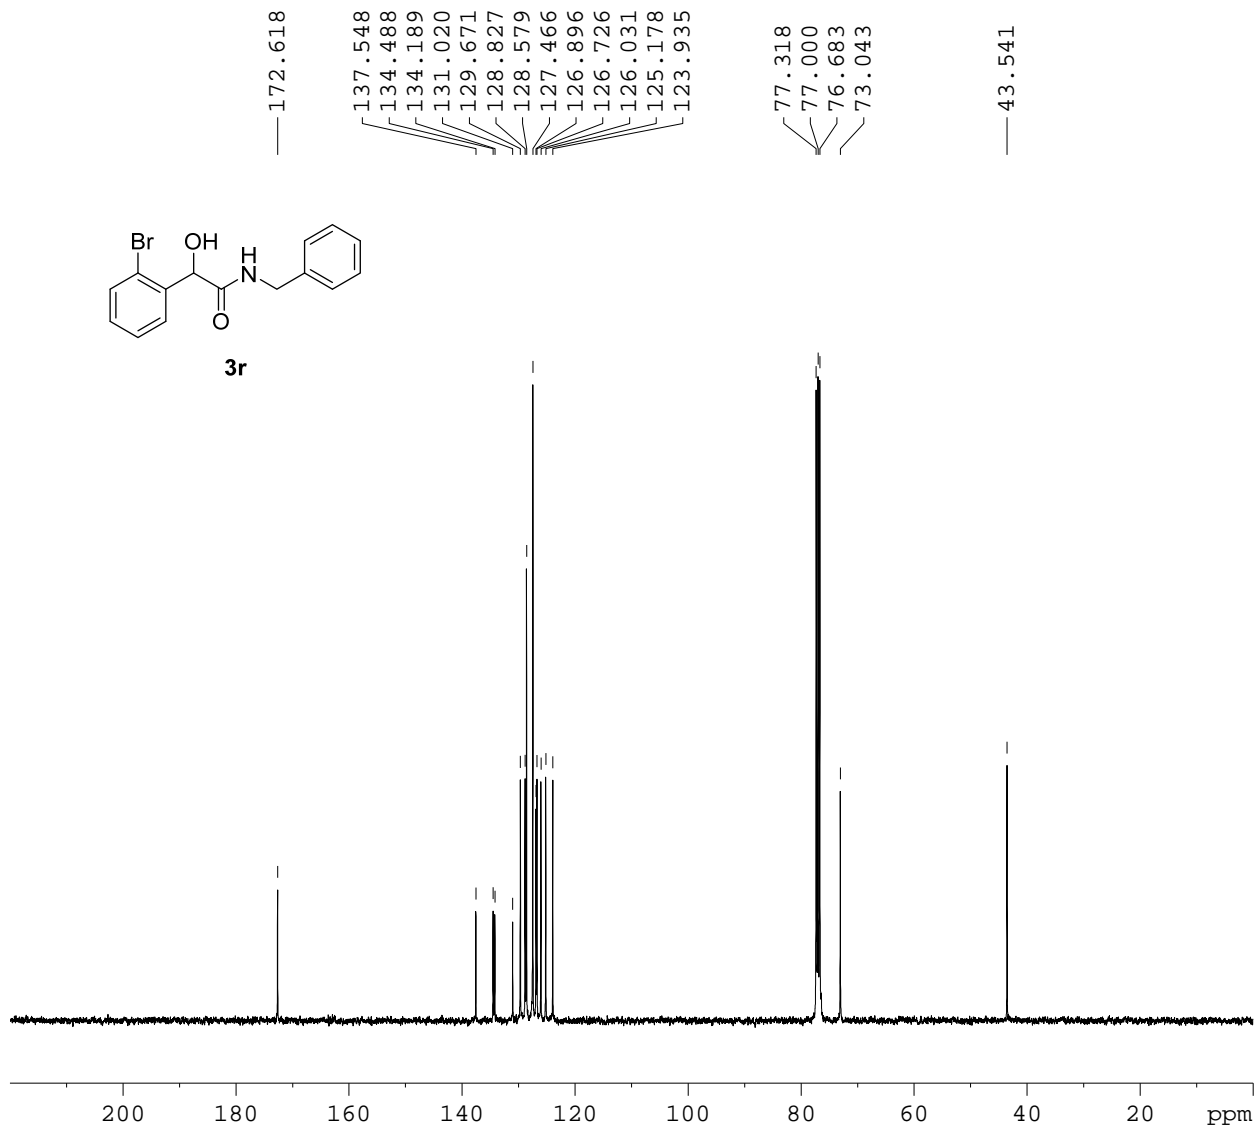

```

NAME      Substrate 13C
EXPNO      7
PROCNO     1
Date_      20150712
Time       15.35
INSTRUM    spect
PROBHD     5 mm DUL 13C-1
PULPROG    zgpg30
TD         65536
SOLVENT    CDC13
NS         1029
DS         0
SWH        22727.273 Hz
FIDRES     0.346791 Hz
AQ         1.4418420 sec
RG         57
DW         22.000 usec
DE         6.00 usec
TE         300.0 K
D1         2.00000000 sec
d11        0.03000000 sec
DELTA      1.89999998 sec
TD0        1
  
```

```

===== CHANNEL f1 =====
NUC1       13C
P1         9.70 usec
PL1        -0.50 dB
SFO1       100.6288660 MHz
  
```

```

===== CHANNEL f2 =====
CPDPRG2    waltz16
NUC2       1H
PCPD2      90.00 usec
PL2        -2.40 dB
PL12       15.10 dB
PL13       18.10 dB
SFO2       400.1516010 MHz
SI         32768
SF         100.6178041 MHz
WDW        EM
SSB        0
LB         3.00 Hz
GB         0
PC         1.00
  
```

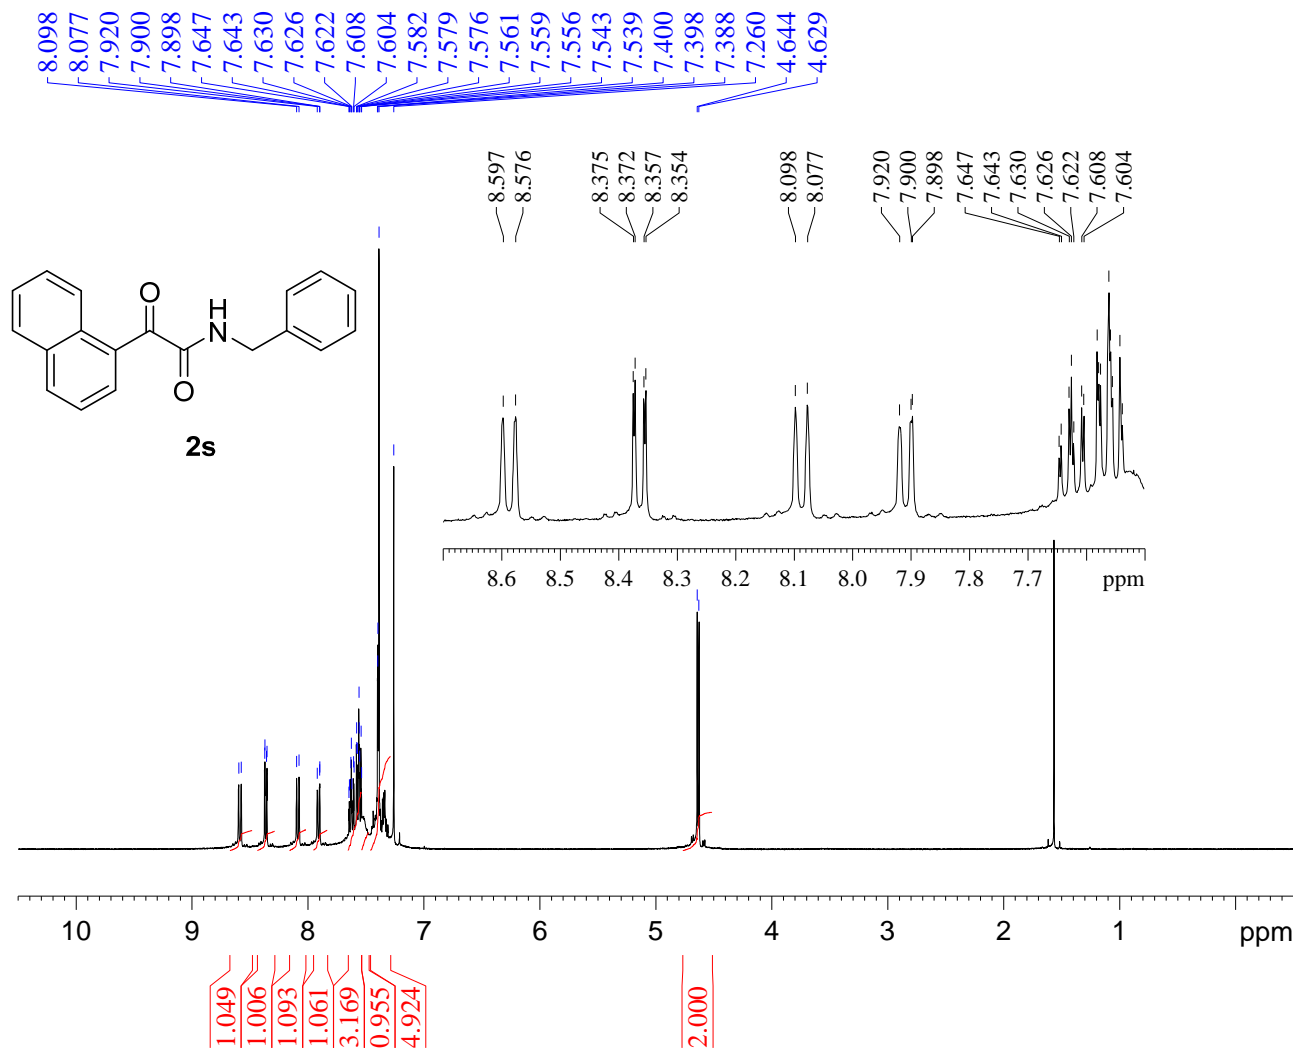

NAME Substrate 1H  
 EXPNO 6  
 PROCNO 1  
 Date\_ 20150712  
 Time 15.19  
 INSTRUM spect  
 PROBHD 5 mm DUL 13C-1  
 PULPROG zg30  
 TD 32768  
 SOLVENT CDCl3  
 NS 52  
 DS 0  
 SWH 6410.256 Hz  
 FIDRES 0.195625 Hz  
 AQ 2.5559540 sec  
 RG 4  
 DW 78.000 usec  
 DE 6.00 usec  
 TE 300.0 K  
 D1 2.00000000 sec  
 TD0 1

===== CHANNEL f1 =====  
 NUC1 1H  
 P1 10.00 usec  
 PL1 -2.40 dB  
 SFO1 400.1528010 MHz  
 SI 16384  
 SF 400.1500088 MHz  
 WDW EM  
 SSB 0  
 LB 0.00 Hz  
 GB 0  
 PC 1.00

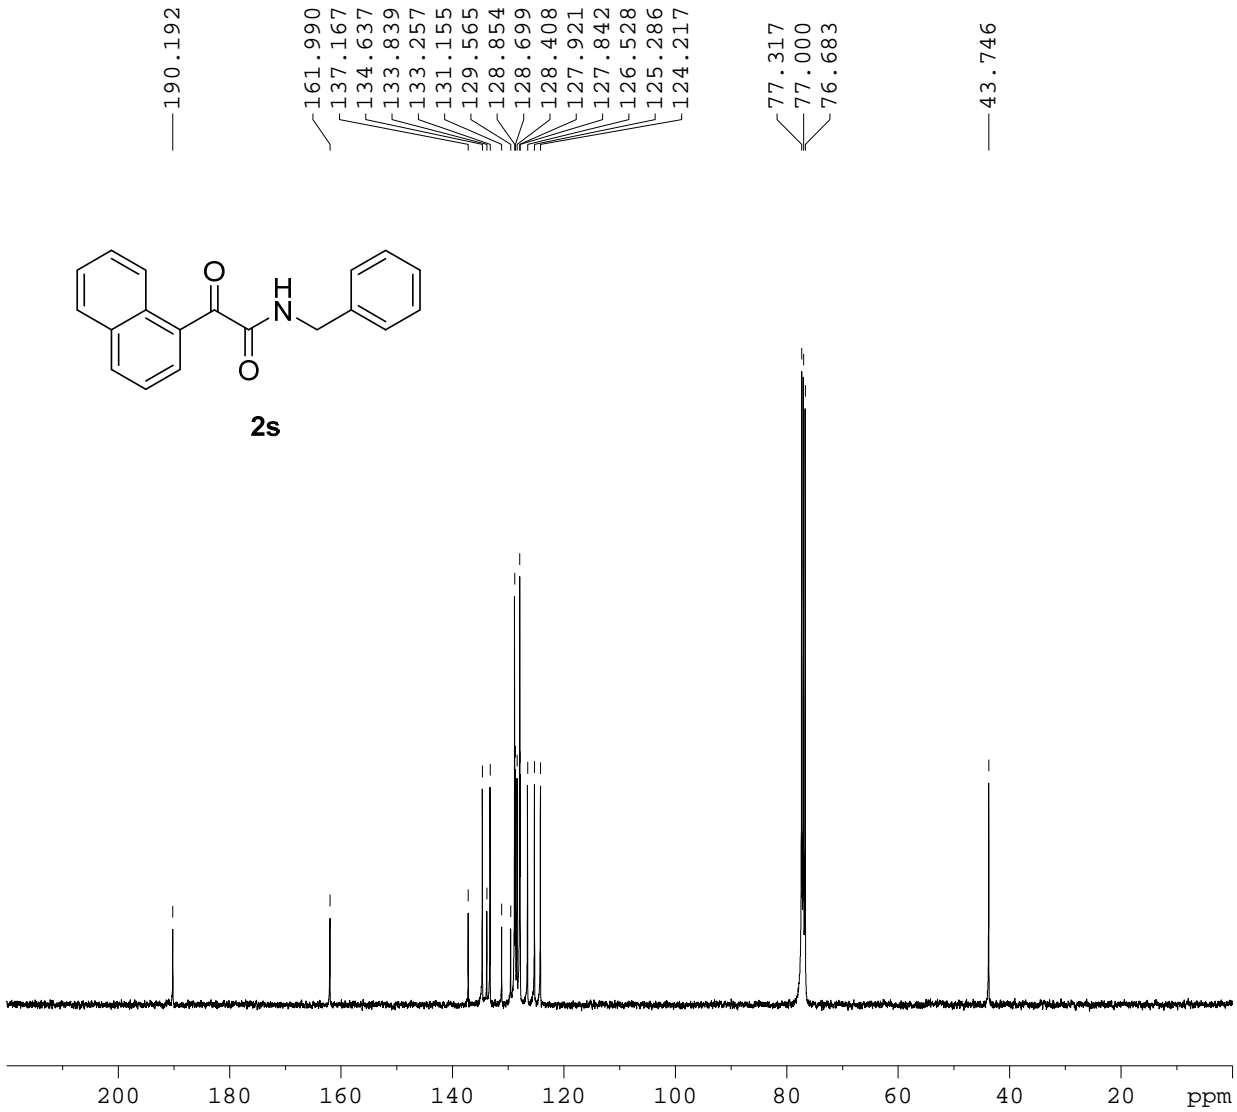

```

NAME      Substrate 13C
EXPNO      6
PROCNO     1
Date_      20150711
Time       17.40
INSTRUM    spect
PROBHD     5 mm DUL 13C-1
PULPROG    zgpg30
TD         65536
SOLVENT    CDCl3
NS         1739
DS         0
SWH        22727.273 Hz
FIDRES     0.346791 Hz
AQ         1.4418420 sec
RG         57
DW         22.000 usec
DE         6.00 usec
TE         300.0 K
D1         2.00000000 sec
d11        0.03000000 sec
DELTA      1.899999998 sec
TD0        1

===== CHANNEL f1 =====
NUC1       13C
P1         9.70 usec
PL1        -0.50 dB
SFO1       100.6288660 MHz

===== CHANNEL f2 =====
CPDPRG2    waltz16
NUC2       1H
PCPD2      90.00 usec
PL2        -2.40 dB
PL12       15.10 dB
PL13       18.10 dB
SFO2       400.1516010 MHz
SI         32768
SF         100.6178034 MHz
WDW        EM
SSB        0
LB         3.00 Hz
GB         0
PC         1.00

```

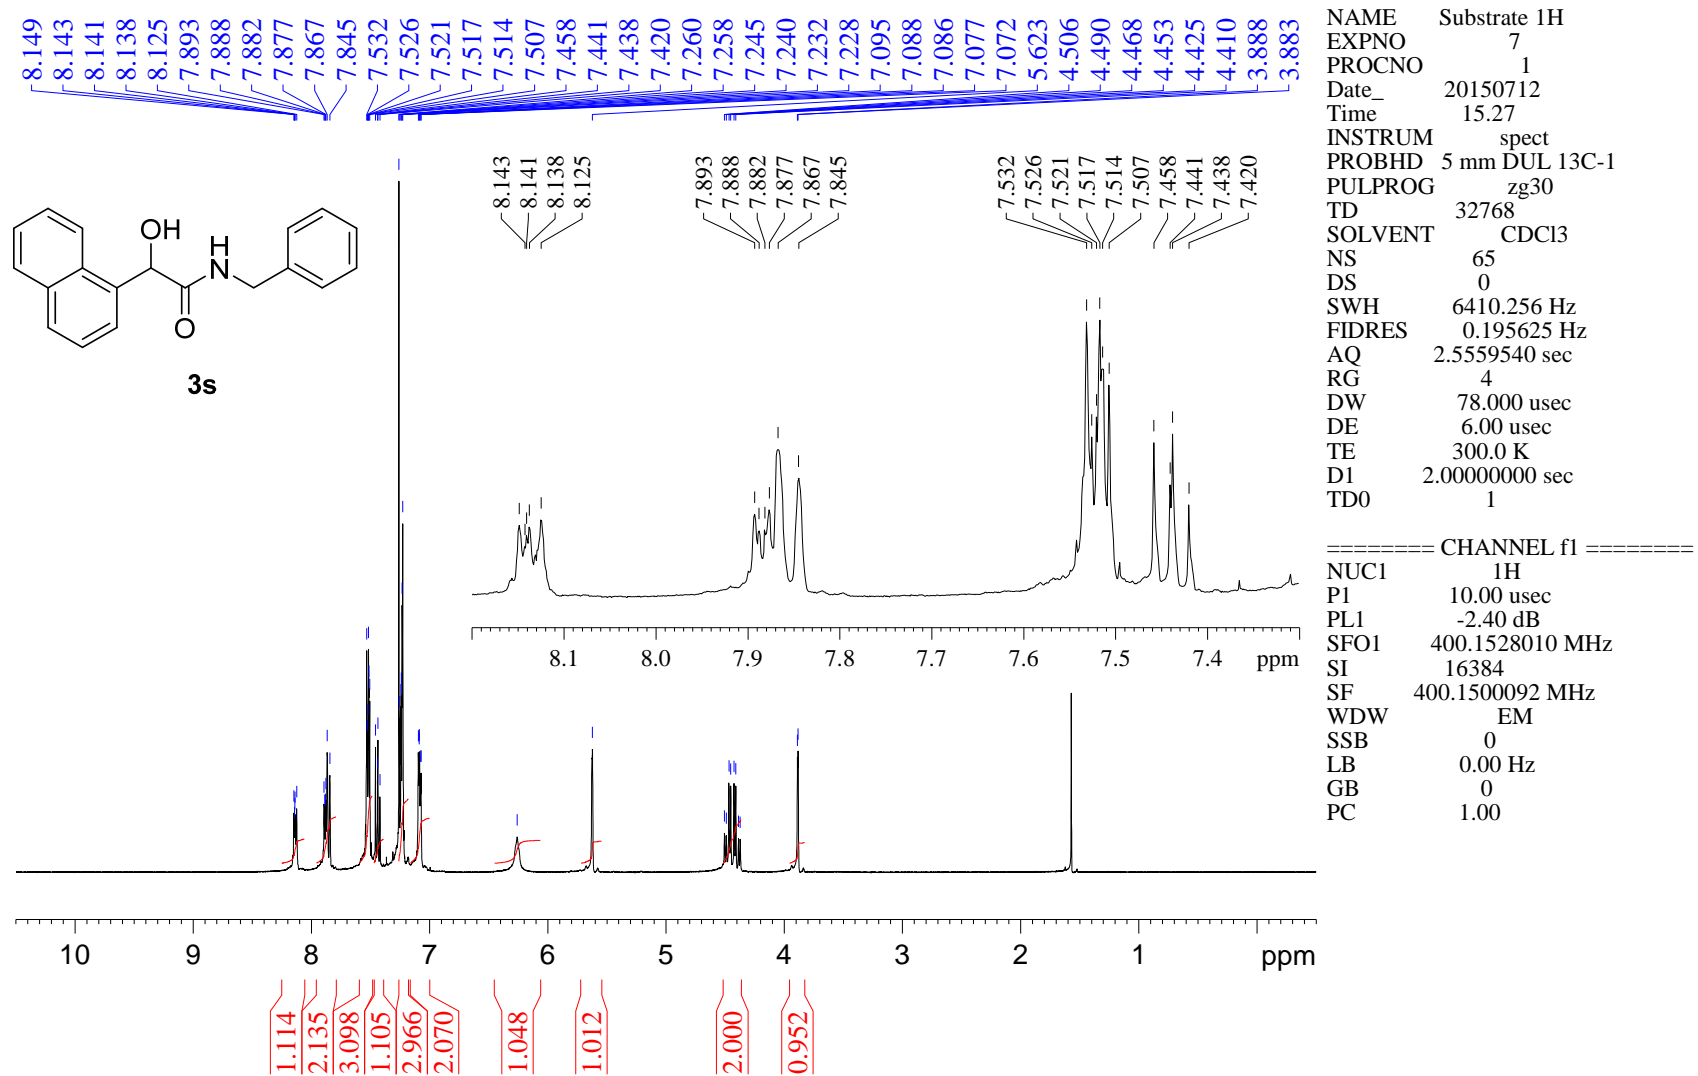

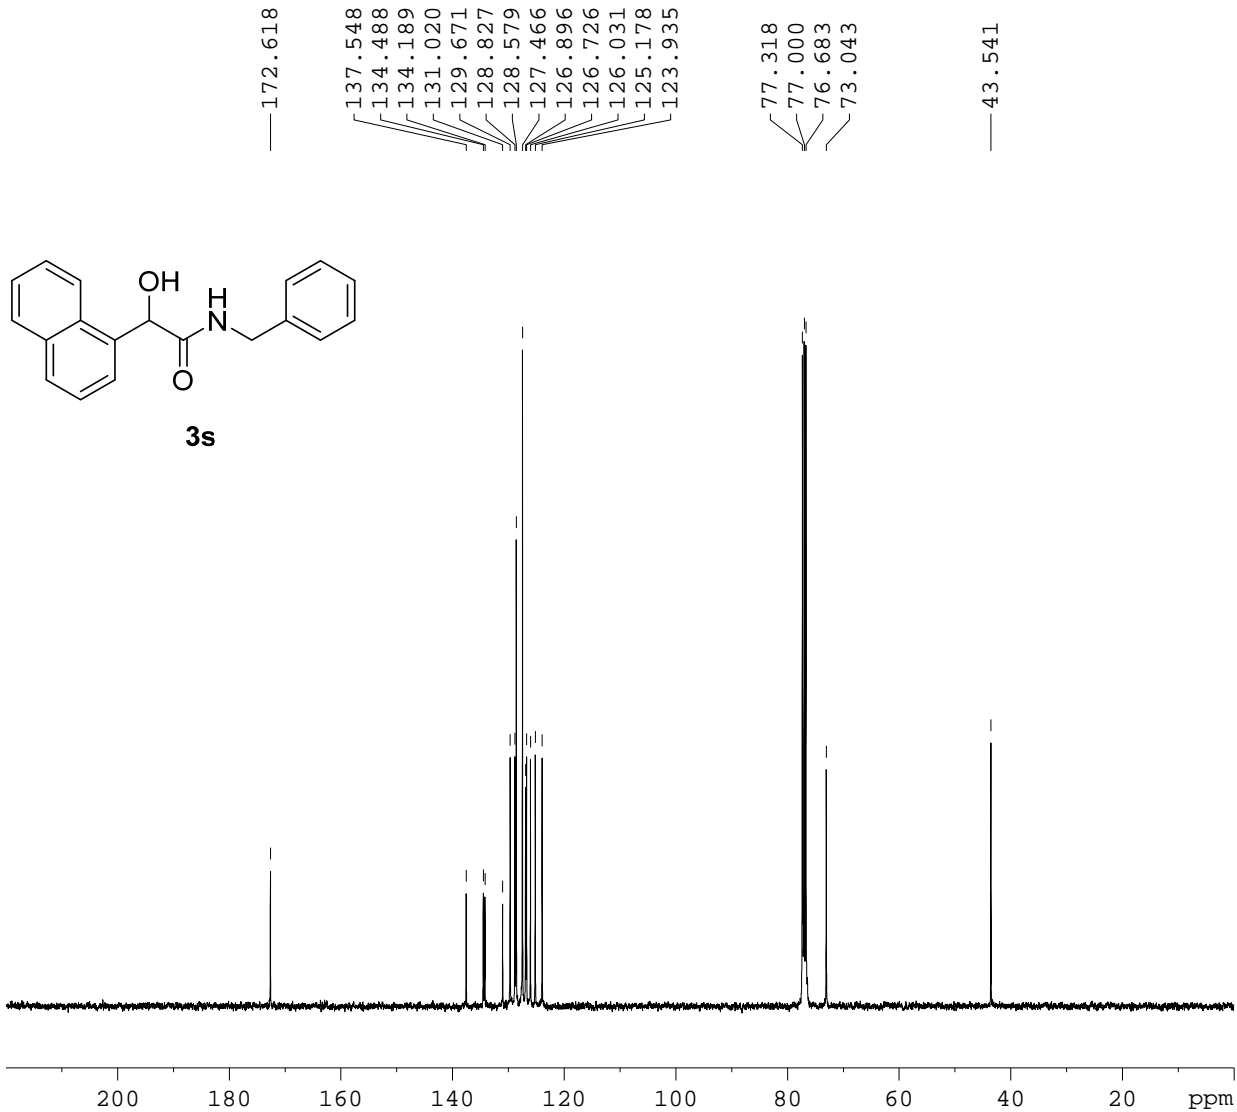

```

NAME      Substrate 13C
EXPNO     7
PROCNO    1
Date_     20150712
Time      15.35
INSTRUM   spect
PROBHD    5 mm DUL 13C-1
PULPROG   zgpg30
TD         65536
SOLVENT   CDC13
NS         1029
DS         0
SWH       22727.273 Hz
FIDRES    0.346791 Hz
AQ         1.4418420 sec
RG         57
DW         22.000 usec
DE         6.00 usec
TE         300.0 K
D1         2.00000000 sec
d11        0.03000000 sec
DELTA     1.89999998 sec
TD0        1

===== CHANNEL f1 =====
NUC1      13C
P1         9.70 usec
PL1        -0.50 dB
SFO1      100.6288660 MHz

===== CHANNEL f2 =====
CPDPRG2   waltz16
NUC2      1H
PCPD2     90.00 usec
PL2        -2.40 dB
PL12      15.10 dB
PL13      18.10 dB
SFO2      400.1516010 MHz
SI         32768
SF         100.6178041 MHz
WDW        EM
SSB        0
LB         3.00 Hz
GB         0
PC         1.00

```
